# Supplementary material for: Integrating Immune Multi-Omics and Machine Learning to Improve Prognosis, Immune Landscape, and Sensitivity to First- and Second-Line Treatments for Head and Neck Squamous Cell Carcinoma
Source: Research Square preprint supplement (doi:10.21203/rs.3.rs-4659367/v1), 2024-07-26
Supplement: Supplementary file 1 [file c5fdda7395b477637f4b53d1.xlsx]

## Sheet: S1
Gene	class	dirct
DES	CS1	up
ACTA1	CS1	up
ACTC1	CS1	up
KRT1	CS1	up
MMP13	CS1	up
SPRR2G	CS1	up
MYL1	CS1	up
MYBPH	CS1	up
KLK5	CS1	up
MYL2	CS1	up
KRTDAP	CS1	up
CKM	CS1	up
MMP1	CS1	up
KRT6C	CS1	up
MMP10	CS1	up
LCE3D	CS1	up
CSRP3	CS1	up
SLN	CS1	up
CASP14	CS1	up
KLK7	CS1	up
KRT14	CS1	up
INHBA	CS1	up
LCE3E	CS1	up
ANKRD1	CS1	up
GJB6	CS1	up
MMP3	CS1	up
MYH2	CS1	up
TCAP	CS1	up
TENM2	CS1	up
AREG	CS1	up
CDA	CS1	up
MYLPF	CS1	up
TNNC1	CS1	up
NIPAL4	CS1	up
MYH1	CS1	up
KRT6B	CS1	up
HSPB3	CS1	up
DSG1	CS1	up
FLRT3	CS1	up
KRT75	CS1	up
SERPINE1	CS1	up
NEFL	CS1	up
PTHLH	CS1	up
MYOG	CS1	up
ARSI	CS1	up
ACTN2	CS1	up
SPINK6	CS1	up
S100A7	CS1	up
TGFBI	CS1	up
EREG	CS1	up
CASQ2	CS1	up
IGFL2	CS1	up
TNNT1	CS1	up
KLK8	CS1	up
KLHL41	CS1	up
KRT16	CS1	up
IGFL1	CS1	up
HEPHL1	CS1	up
PNLIPRP3	CS1	up
MYH7	CS1	up
HSPB7	CS1	up
SMPX	CS1	up
CAV1	CS1	up
CPA4	CS1	up
SBSN	CS1	up
NT5E	CS1	up
FSTL3	CS1	up
GJB2	CS1	up
VEGFC	CS1	up
MT2A	CS1	up
FABP4	CS1	up
IGFL3	CS1	up
GOLGA7B	CS1	up
TNNI1	CS1	up
NRAP	CS1	up
S100A7A	CS1	up
MYF6	CS1	up
SPRR2B	CS1	up
IGFBP6	CS1	up
WFDC12	CS1	up
CNGB1	CS1	up
DMKN	CS1	up
FLNC	CS1	up
EPGN	CS1	up
CRCT1	CS1	up
F2RL1	CS1	up
FABP5	CS1	up
MYBPC2	CS1	up
GSDMA	CS1	up
WNT7A	CS1	up
HTR7	CS1	up
KLK10	CS1	up
SLC6A11	CS1	up
LMOD2	CS1	up
ADAMTS15	CS1	up
TNNI2	CS1	up
SRPX	CS1	up
HOXC13	CS1	up
MT1E	CS1	up
FAM83A	CS1	up
KRT17	CS1	up
TIMP3	CS1	up
RGS20	CS1	up
MB	CS1	up
CSPG4	CS1	up
SH2D5	CS1	up
CCNA1	CS1	up
SLC22A3	CS1	up
THSD1	CS1	up
APOBEC2	CS1	up
AMIGO2	CS1	up
CLCA2	CS1	up
TNC	CS1	up
GALNT6	CS1	up
CST6	CS1	up
EEF1A2	CS1	up
SEMA3C	CS1	up
COL12A1	CS1	up
NGF	CS1	up
FN1	CS1	up
IL24	CS1	up
CHGB	CS1	up
SPOCK1	CS1	up
TNNT3	CS1	up
MYOM3	CS1	up
CLMP	CS1	up
USP2	CS1	up
SORCS2	CS1	up
GJA1	CS1	up
PPP1R27	CS1	up
MAGEA4	CS1	up
PRR9	CS1	up
NNMT	CS1	up
CAVIN4	CS1	up
ASB5	CS1	up
CA2	CS1	up
RNASE7	CS1	up
BASP1	CS1	up
ITGA5	CS1	up
TNNC2	CS1	up
POPDC3	CS1	up
PYGL	CS1	up
LAMC2	CS1	up
CACNG1	CS1	up
XIRP1	CS1	up
AHNAK2	CS1	up
KPRP	CS1	up
XIRP2	CS1	up
CHRNA1	CS1	up
THBD	CS1	up
MFAP5	CS1	up
PRSS23	CS1	up
MN1	CS1	up
COL5A1	CS1	up
PPP2R2C	CS1	up
NEB	CS1	up
MSX2	CS1	up
COL5A2	CS1	up
SLITRK6	CS1	up
TNFRSF12A	CS1	up
COL17A1	CS1	up
TRIM63	CS1	up
PCDH7	CS1	up
THBS1	CS1	up
SPRR1B	CS1	up
CHRND	CS1	up
SULF2	CS1	up
FOSL1	CS1	up
KANK4	CS1	up
APCDD1L	CS1	up
KRT6A	CS1	up
COL1A1	CS1	up
CAMK2N1	CS1	up
JPH2	CS1	up
PDPN	CS1	up
RHOD	CS1	up
F3	CS1	up
EN1	CS1	up
KCNJ15	CS1	up
COX6A2	CS1	up
PI3	CS1	up
SPTLC3	CS1	up
ZBED2	CS1	up
PAEP	CS1	up
ANO1	CS1	up
SPRR4	CS1	up
CXCL14	CS1	up
HRC	CS1	up
CA12	CS1	up
RAB38	CS1	up
NMRK2	CS1	up
FAP	CS1	up
SDR9C7	CS1	up
LCE1F	CS1	up
FOLR3	CS1	up
COL11A1	CS1	up
MYOZ1	CS1	up
CSF2	CS1	up
SLC6A2	CS1	up
SPON2	CS1	up
RRAD	CS1	up
LMOD3	CS1	up
FLRT2	CS1	up
COL4A6	CS1	up
ACTN1	CS1	up
SERINC2	CS1	up
SLURP1	CS1	up
TRDN	CS1	up
C1orf68	CS1	up
FBLIM1	CS1	up
FHL1	CS1	up
EVA1A	CS1	up
PMEPA1	CS1	up
STAC3	CS1	up
THBS2	CS1	up
KRT10	CS1	up
CWH43	CS1	up
PAQR5	CS1	up
TPM2	CS1	up
CYP26B1	CS1	up
COL5A3	CS1	up
SHISAL1	CS1	up
SFRP2	CS1	up
DSC1	CS1	up
HTRA1	CS1	up
ITGA3	CS1	up
DLX3	CS1	up
GPR68	CS1	up
LGALS7B	CS1	up
SLC7A5	CS1	up
LAMA3	CS1	up
ARL14	CS1	up
PODNL1	CS1	up
MYOZ2	CS1	up
C1QTNF6	CS1	up
COL1A2	CS1	up
PLK2	CS1	up
MYH3	CS1	up
PLA2G4E	CS1	up
PTGS1	CS1	up
IL1A	CS1	up
IFI6	CS1	up
POSTN	CS1	up
CALB2	CS1	up
KLK6	CS1	up
COL3A1	CS1	up
POU3F1	CS1	up
MYPN	CS1	up
MYO1B	CS1	up
CDH13	CS1	up
TUBB2A	CS1	up
SLC38A5	CS1	up
MSC	CS1	up
DCBLD1	CS1	up
MYOT	CS1	up
IVL	CS1	up
LCE1A	CS1	up
MUCL1	CS1	up
KLHL40	CS1	up
MMP2	CS1	up
IL20	CS1	up
LIPK	CS1	up
SLC16A2	CS1	up
NEFM	CS1	up
CAV3	CS1	up
PLAU	CS1	up
LCE3A	CS1	up
SMYD1	CS1	up
SLC24A3	CS1	up
SYT7	CS1	up
UPP1	CS1	up
SPRR2E	CS1	up
IFIT1	CS1	up
DKK3	CS1	up
TPM1	CS1	up
LTBP1	CS1	up
PDGFC	CS1	up
FGFBP1	CS1	up
STYXL2	CS1	up
SGCA	CS1	up
TLL1	CS1	up
RBM24	CS1	up
SIRPA	CS1	up
FXYD5	CS1	up
TREM1	CS1	up
IRS1	CS1	up
CAP2	CS1	up
NEXN	CS1	up
BNC1	CS1	up
FHL2	CS1	up
TUBB6	CS1	up
RPL3L	CS1	up
LCE2A	CS1	up
IGF2BP2	CS1	up
CACNA1S	CS1	up
MXRA5	CS1	up
TENM3	CS1	up
BPIFC	CS1	up
AJAP1	CS1	up
MYADM	CS1	up
PCDHGC5	CS1	up
GSDME	CS1	up
IL11	CS1	up
ATP1A2	CS1	up
TUBA4A	CS1	up
NCAM1	CS1	up
SAMD9	CS1	up
GPR1	CS1	up
SNAI2	CS1	up
AKR1B15	CS1	up
BGN	CS1	up
EDNRA	CS1	up
CARD18	CS1	up
LCE3C	CS1	up
CDH3	CS1	up
S100A12	CS1	up
CERCAM	CS1	up
MME	CS1	up
MYBPC1	CS1	up
CDK6	CS1	up
CHPF	CS1	up
FSCN1	CS1	up
CYP39A1	CS1	up
PPP1R14C	CS1	up
HTRA3	CS1	up
CORO6	CS1	up
HMGA2	CS1	up
SMTN	CS1	up
KIRREL1	CS1	up
SEC14L2	CS1	up
DKK1	CS1	up
LGALS1	CS1	up
F13A1	CS1	up
CTSL	CS1	up
DUSP6	CS1	up
BIN1	CS1	up
TMEM92	CS1	up
EHD2	CS1	up
PRNP	CS1	up
UNC45B	CS1	up
CTSV	CS1	up
LCE2C	CS1	up
MAFB	CS1	up
HJV	CS1	up
LCE2B	CS1	up
S100A2	CS1	up
KLC3	CS1	up
KIFC3	CS1	up
ISG15	CS1	up
ZNF114	CS1	up
CRYAB	CS1	up
MYH10	CS1	up
LPAR3	CS1	up
SPOCD1	CS1	up
TNFAIP6	CS1	up
MICAL2	CS1	up
MEAK7	CS1	up
SCG5	CS1	up
MYL4	CS1	up
C10orf71	CS1	up
TENT5B	CS1	up
SLC7A8	CS1	up
L1CAM	CS1	up
LDB3	CS1	up
MDFI	CS1	up
ITGA6	CS1	up
CYP27C1	CS1	up
PROCR	CS1	up
SFN	CS1	up
DDIT4L	CS1	up
SPRR5	CS1	up
DDN	CS1	up
COL6A1	CS1	up
GDPD2	CS1	up
DLX1	CS1	up
CASQ1	CS1	up
TMEM45A	CS1	up
COL6A2	CS1	up
CALD1	CS1	up
C10orf99	CS1	up
SMOC1	CS1	up
SCT	CS1	up
KLHL30	CS1	up
ENDOD1	CS1	up
DACT1	CS1	up
SLC35F3	CS1	up
SERPINH1	CS1	up
LOXL2	CS1	up
PGLYRP4	CS1	up
KRT34	CS1	up
CAV2	CS1	up
SLC39A2	CS1	up
IFFO2	CS1	up
RDH12	CS1	up
SGCG	CS1	up
MFAP2	CS1	up
SERPINE2	CS1	up
MYH8	CS1	up
COL6A3	CS1	up
EFNB2	CS1	up
AKR1B10	CS1	up
ADPRHL1	CS1	up
CAVIN1	CS1	up
SOX15	CS1	up
NID1	CS1	up
SGPP1	CS1	up
GSDMC	CS1	up
PCDHGC3	CS1	up
DEFB4A	CS1	up
SPRR2D	CS1	up
SGCD	CS1	up
EML1	CS1	up
BMP2	CS1	up
MMP17	CS1	up
AGPAT4	CS1	up
FOXC2	CS1	up
IRX4	CS1	up
ALOXE3	CS1	up
PDLIM7	CS1	up
FEZ1	CS1	up
IFI27	CS1	up
DYSF	CS1	up
ADGRF4	CS1	up
NRG1	CS1	up
CHST11	CS1	up
MYO5A	CS1	up
MYL3	CS1	up
PLEK2	CS1	up
RAET1G	CS1	up
PANX1	CS1	up
PLEC	CS1	up
TRIML2	CS1	up
COL10A1	CS1	up
PXDN	CS1	up
LHX1	CS1	up
STRIT1	CS1	up
TH	CS1	up
ZNF469	CS1	up
ADAM12	CS1	up
FST	CS1	up
APLN	CS1	up
LCE2D	CS1	up
CA3	CS1	up
EPHB3	CS1	up
PROC	CS1	up
KLF10	CS1	up
GAST	CS1	up
CAMK2A	CS1	up
INPP4B	CS1	up
ANTXR2	CS1	up
CMYA5	CS1	up
PRRG1	CS1	up
LIMA1	CS1	up
CYP27B1	CS1	up
ULBP2	CS1	up
TTN	CS1	up
SERPINB3	CS1	up
DUSP26	CS1	up
ACP7	CS1	up
NSG1	CS1	up
NOCT	CS1	up
IFIT3	CS1	up
CARD10	CS1	up
SLC7A11	CS1	up
TAGLN	CS1	up
RHOB	CS1	up
LAMB3	CS1	up
DHRS7	CS1	up
S100A10	CS1	up
GPR153	CS1	up
CXCL11	CS1	up
PXDC1	CS1	up
SFXN3	CS1	up
ADAMTS2	CS1	up
MAP3K20	CS1	up
P4HA2	CS1	up
MYMK	CS1	up
CDH15	CS1	up
TNS4	CS1	up
SFRP1	CS1	up
WNT11	CS1	up
CAVIN3	CS1	up
TMCC3	CS1	up
KLK11	CS1	up
TSHZ3	CS1	up
NPR2	CS1	up
BTBD11	CS1	up
BDKRB1	CS1	up
SYNPO2L	CS1	up
STON2	CS1	up
VCAN	CS1	up
SHISA4	CS1	up
INHBB	CS1	up
XDH	CS1	up
SPARC	CS1	up
SHANK2	CS1	up
IL18	CS1	up
IL20RB	CS1	up
CYP4F22	CS1	up
IFITM3	CS1	up
TSPAN10	CS1	up
PYGM	CS1	up
PTPRD	CS1	up
SERPINB7	CS1	up
GLT8D2	CS1	up
TGFBR2	CS1	up
P3H2	CS1	up
MMP11	CS1	up
ADAMTS12	CS1	up
TBX1	CS1	up
MEDAG	CS1	up
UBTD1	CS1	up
ADAMTS14	CS1	up
HAS2	CS1	up
CYB5R1	CS1	up
PRUNE2	CS1	up
BBOX1	CS1	up
GPC6	CS1	up
BARX2	CS1	up
TM4SF19	CS1	up
AEBP1	CS1	up
RIN1	CS1	up
MYO18B	CS1	up
IP6K3	CS1	up
LY6G6C	CS1	up
SYNC	CS1	up
NAV3	CS1	up
FJX1	CS1	up
TEX29	CS1	up
BCAR3	CS1	up
APBB2	CS1	up
RAB31	CS1	up
DIRAS1	CS1	up
MMP9	CS1	up
RGS4	CS1	up
ABLIM3	CS1	up
CCND1	CS1	up
ARRDC4	CS1	up
BDKRB2	CS1	up
GLIPR1	CS1	up
LRRC15	CS1	up
SMIM3	CS1	up
ATP1B4	CS1	up
GREM1	CS1	up
CTSC	CS1	up
KCTD11	CS1	up
PXN	CS1	up
MYOM1	CS1	up
NELL2	CS1	up
NQO1	CS1	up
SLCO1B3	CS1	up
SLC37A2	CS1	up
MET	CS1	up
CD276	CS1	up
LPCAT2	CS1	up
PHLDB2	CS1	up
TREM2	CS1	up
KLK14	CS1	up
MMP28	CS1	up
TRPV3	CS1	up
CARD6	CS1	up
C1orf116	CS1	up
KLF7	CS1	up
MSN	CS1	up
CREG2	CS1	up
VDR	CS1	up
TMEM86A	CS1	up
DUSP13	CS1	up
FHOD1	CS1	up
HHATL	CS1	up
LRRC17	CS1	up
ADAMTSL4	CS1	up
KIF26B	CS1	up
ARL4D	CS1	up
CAPNS2	CS1	up
MAP7D1	CS1	up
RHEX	CS1	up
MBOAT2	CS1	up
MRC1	CS1	up
SYPL2	CS1	up
SLC4A3	CS1	up
TMOD4	CS1	up
FAM89A	CS1	up
GFPT2	CS1	up
BMPR1B	CS1	up
CLEC11A	CS1	up
ARSJ	CS1	up
CKMT2	CS1	up
PSORS1C1	CS1	up
DLX2	CS1	up
RUNDC3A	CS1	up
ABCA12	CS1	up
LMX1B	CS1	up
OAF	CS1	up
SMOX	CS1	up
AFAP1L1	CS1	up
SAA1	CS1	up
OLR1	CS1	up
CHST2	CS1	up
C6orf15	CS1	up
USB1	CS1	up
PLA2G2F	CS1	up
SLC2A9	CS1	up
IRX2	CS1	up
TRIM55	CS1	up
ENAH	CS1	up
MSRB3	CS1	up
IL6	CS1	up
CRISPLD2	CS1	up
SPANXB1	CS1	up
IL31RA	CS1	up
CITED4	CS1	up
TMEM154	CS1	up
BAIAP2L2	CS1	up
CCBE1	CS1	up
EFNB1	CS1	up
CACNG6	CS1	up
LCE6A	CS1	up
RTN4	CS1	up
TRIM54	CS1	up
SERPINB5	CS1	up
ANKRD2	CS1	up
PLPP4	CS1	up
SLC3A2	CS1	up
FADS3	CS1	up
PDCD1LG2	CS1	up
MMP14	CS1	up
FKBP9	CS1	up
PRKAG3	CS1	up
TIMP2	CS1	up
SERPING1	CS1	up
NDRG1	CS1	up
SOWAHC	CS1	up
ITGB6	CS1	up
CDHR1	CS1	up
TPPP3	CS1	up
VGLL3	CS1	up
FAM110C	CS1	up
NRIP1	CS1	up
SMTNL2	CS1	up
ZNF365	CS1	up
LAMP5	CS1	up
GLIS1	CS1	up
GRP	CS1	up
ATP2A1	CS1	up
LPCAT1	CS1	up
SEMA3A	CS1	up
SCARA5	CS1	up
CFAP251	CS1	up
OLFML3	CS1	up
BNIP3	CS1	up
AKAP6	CS1	up
CD151	CS1	up
MLIP	CS1	up
WARS1	CS1	up
RAB11FIP5	CS1	up
PGF	CS1	up
SLC5A1	CS1	up
NLRP10	CS1	up
SHC1	CS1	up
CEACAM19	CS1	up
TGFA	CS1	up
C1S	CS1	up
LGALSL	CS1	up
RNF222	CS1	up
EFEMP1	CS1	up
IL36RN	CS1	up
MSRB1	CS1	up
CREB5	CS1	up
TSPAN2	CS1	up
IMPDH1	CS1	up
LRRC38	CS1	up
CCDC71L	CS1	up
PKP3	CS1	up
RAPSN	CS1	up
FSTL1	CS1	up
CERS3	CS1	up
ENO3	CS1	up
ARPP21	CS1	up
AGTRAP	CS1	up
MARVELD1	CS1	up
MAF	CS1	up
SAMD4A	CS1	up
KDELR3	CS1	up
CD44	CS1	up
HRH1	CS1	up
CHRNA9	CS1	up
COL16A1	CS1	up
CDH11	CS1	up
CCN2	CS1	up
ZNF474	CS1	up
FIBIN	CS1	up
PCOLCE	CS1	up
SLC10A6	CS1	up
CGB8	CS1	up
HS3ST3A1	CS1	up
ELL2	CS1	up
SULF1	CS1	up
CEBPB	CS1	up
DOK4	CS1	up
P4HA3	CS1	up
MT1X	CS1	up
ASPRV1	CS1	up
MAGEB2	CS1	up
DNAJB5	CS1	up
SH3RF3	CS1	up
RPE65	CS1	up
PTK6	CS1	up
ROS1	CS1	up
CFL2	CS1	up
MYL9	CS1	up
TTLL11	CS1	up
CCL13	CS1	up
DSE	CS1	up
PTGFRN	CS1	up
CDH16	CS1	up
C11orf96	CS1	up
HAS1	CS1	up
C5orf46	CS1	up
COPZ2	CS1	up
LIPG	CS1	up
UNC93A	CS1	up
RCN3	CS1	up
FOXL2	CS1	up
ASPN	CS1	up
DPF1	CS1	up
MAN1A1	CS1	up
SYNPO	CS1	up
ITGB1	CS1	up
ARHGEF4	CS1	up
NID2	CS1	up
GPX8	CS1	up
KCNK6	CS1	up
FURIN	CS1	up
NOD2	CS1	up
TANC2	CS1	up
IL1RL1	CS1	up
DIO3	CS1	up
FAM25C	CS1	up
PLCD3	CS1	up
EDIL3	CS1	up
ULBP3	CS1	up
HOMER3	CS1	up
NRP1	CS1	up
PPIF	CS1	up
NAV1	CS1	up
PLN	CS1	up
CRABP2	CS1	up
COX7A1	CS1	up
PINK1	CS1	up
NDFIP2	CS1	up
GASK1B	CS1	up
LUM	CS1	up
SLC38A2	CS1	up
TGFB1	CS1	up
CLDN17	CS1	up
DDX60	CS1	up
DDX60L	CS1	up
FLNA	CS1	up
B4GALNT1	CS1	up
RIMS3	CS1	up
RBP1	CS1	up
HBEGF	CS1	up
EMP3	CS1	up
LYPD5	CS1	up
SP110	CS1	up
SDK2	CS1	up
SCN4A	CS1	up
ATP10D	CS1	up
SPTB	CS1	up
MAMDC2	CS1	up
PLAUR	CS1	up
TMEM158	CS1	up
NGEF	CS1	up
MYOM2	CS1	up
PIEZO1	CS1	up
FOXF2	CS1	up
CST3	CS1	up
PTK7	CS1	up
TSPAN5	CS1	up
SLC22A15	CS1	up
VGLL2	CS1	up
SLC12A4	CS1	up
NFE2	CS1	up
SLC38A4	CS1	up
IFNE	CS1	up
MAP2	CS1	up
SLC16A1	CS1	up
RSAD2	CS1	up
TSC22D2	CS1	up
PPP4R4	CS1	up
BEST3	CS1	up
GBP1	CS1	up
CYTH3	CS1	up
TMEM79	CS1	up
H2BC4	CS1	up
CLTB	CS1	up
ZCCHC24	CS1	up
PRICKLE1	CS1	up
PPP1R3C	CS1	up
CASP4	CS1	up
WWC2	CS1	up
IL22RA1	CS1	up
IL36G	CS1	up
IRX1	CS1	up
CTTN	CS1	up
PITX2	CS1	up
UBE2Q2	CS1	up
ITGA7	CS1	up
INF2	CS1	up
PNPLA1	CS1	up
CCN1	CS1	up
MAP1A	CS1	up
SCN4B	CS1	up
SMTNL1	CS1	up
SCARF2	CS1	up
TRIM6	CS1	up
TWIST1	CS1	up
NTM	CS1	up
FAM214B	CS1	up
MAP4K4	CS1	up
ME1	CS1	up
PSG4	CS1	up
HRCT1	CS1	up
THBS4	CS1	up
MAGEA11	CS1	up
NDEL1	CS1	up
PHLDB1	CS1	up
BAK1	CS1	up
JHY	CS1	up
NDN	CS1	up
NANOS1	CS1	up
PVR	CS1	up
PAPPA	CS1	up
BMP1	CS1	up
PDGFA	CS1	up
TMOD1	CS1	up
HSPB6	CS1	up
FAM126A	CS1	up
SEC23A	CS1	up
CD248	CS1	up
PHLDA1	CS1	up
CLIP4	CS1	up
TBX15	CS1	up
PLPPR2	CS1	up
LAMA4	CS1	up
STARD13	CS1	up
PLIN3	CS1	up
AXL	CS1	up
STK17A	CS1	up
RPS6KA4	CS1	up
CPXM1	CS1	up
EPSTI1	CS1	up
MAP3K7CL	CS1	up
RNASE10	CS1	up
TTYH3	CS1	up
C5orf38	CS1	up
LDHA	CS1	up
NXN	CS1	up
CXCR1	CS1	up
ADCY7	CS1	up
SUGCT	CS1	up
DUSP14	CS1	up
APCDD1	CS1	up
PMP22	CS1	up
PNP	CS1	up
MGLL	CS1	up
TTC7B	CS1	up
DHRS2	CS1	up
ARHGEF37	CS1	up
MYOD1	CS1	up
TTPAL	CS1	up
CLCF1	CS1	up
FBN2	CS1	up
KLF6	CS1	up
FLG2	CS1	up
CNN1	CS1	up
TNFSF9	CS1	up
CTSK	CS1	up
TMSB10	CS1	up
RNF217	CS1	up
SGMS2	CS1	up
PLS3	CS1	up
COL4A1	CS1	up
MXRA8	CS1	up
CDH2	CS1	up
ENPEP	CS1	up
P3H1	CS1	up
IFIT2	CS1	up
CALHM5	CS1	up
PDGFRB	CS1	up
XG	CS1	up
LRRC32	CS1	up
CPEB2	CS1	up
ACP5	CS1	up
MYLK2	CS1	up
MATN3	CS1	up
HEYL	CS1	up
DCN	CS1	up
FAM83G	CS1	up
ABL2	CS1	up
DLL1	CS1	up
PI15	CS1	up
WFDC5	CS1	up
SLC44A5	CS1	up
CD36	CS1	up
KCNJ12	CS1	up
RUNX2	CS1	up
TRIM58	CS1	up
ADAMTS7	CS1	up
PTX3	CS1	up
CASP1	CS1	up
FHL3	CS1	up
ZYX	CS1	up
METTL7B	CS1	up
OTUB2	CS1	up
ELMO3	CS1	up
DSC2	CS1	up
AGPAT2	CS1	up
RRAS2	CS1	up
TOX2	CS1	up
MAP4	CS1	up
MYOZ3	CS1	up
APP	CS1	up
FERMT1	CS1	up
KCNF1	CS1	up
MMP16	CS1	up
DIPK1A	CS1	up
SLC6A15	CS1	up
MFSD2A	CS1	up
CLIC3	CS1	up
SLC39A13	CS1	up
KCNK10	CS1	up
RFLNB	CS1	up
MYOF	CS1	up
TWIST2	CS1	up
JAG1	CS1	up
ANXA3	CS1	up
PIM1	CS1	up
EXT2	CS1	up
IGFN1	CS1	up
HOXA1	CS1	up
PLOD1	CS1	up
SLC7A1	CS1	up
SLC38A7	CS1	up
KLHL31	CS1	up
ARHGAP29	CS1	up
PALMD	CS1	up
PEAR1	CS1	up
BEND6	CS1	up
FBN1	CS1	up
F2R	CS1	up
NES	CS1	up
PRKCA	CS1	up
CTHRC1	CS1	up
HOXC11	CS1	up
YWHAZ	CS1	up
ISLR	CS1	up
CYS1	CS1	up
GRN	CS1	up
SRPX2	CS1	up
RNF128	CS1	up
ACER1	CS1	up
PIP4P2	CS1	up
HELZ2	CS1	up
ENTPD7	CS1	up
TGFB2	CS1	up
GALNT2	CS1	up
UBASH3B	CS1	up
HACD1	CS1	up
NIPAL1	CS1	up
VIM	CS1	up
DAAM1	CS1	up
SPON1	CS1	up
PPFIBP1	CS1	up
LGALS9C	CS1	up
SLPI	CS1	up
GPR176	CS1	up
PDLIM3	CS1	up
LCN1	CS1	up
PDE2A	CS1	up
RAB3IL1	CS1	up
PCDHGA10	CS1	up
SLC47A2	CS1	up
MYF5	CS1	up
OLFML2B	CS1	up
KRT31	CS1	up
SPRY4	CS1	up
ADAMTS4	CS1	up
ITGA11	CS1	up
ITPRID2	CS1	up
PTPRE	CS1	up
GALNT15	CS1	up
ANXA5	CS1	up
NKX2-8	CS1	up
ACKR4	CS1	up
SLURP2	CS1	up
FERMT2	CS1	up
DNER	CS1	up
TCEAL7	CS1	up
CRIM1	CS1	up
PCDHGB2	CS1	up
ST8SIA2	CS1	up
BPGM	CS1	up
KRT79	CS1	up
CCL7	CS1	up
GALNT18	CS1	up
KCNK7	CS1	up
CALM1	CS1	up
SCN1B	CS1	up
LRRC8C	CS1	up
SDC2	CS1	up
SNPH	CS1	up
SPEG	CS1	up
C6orf141	CS1	up
ADM	CS1	up
EPDR1	CS1	up
ELOVL4	CS1	up
CDC42EP3	CS1	up
HSPH1	CS1	up
ACTA2	CS1	up
FMNL2	CS1	up
BOK	CS1	up
PPP1R14B	CS1	up
PLXDC2	CS1	up
TDO2	CS1	up
BOP1	CS1	up
GNA12	CS1	up
KTN1	CS1	up
ANPEP	CS1	up
TFPI2	CS1	up
MMP12	CS1	up
LARGE2	CS1	up
PPP1R3A	CS1	up
LHX5	CS1	up
LGALS9B	CS1	up
MISP	CS1	up
PAM	CS1	up
EFNB3	CS1	up
FAM25A	CS1	up
PDGFB	CS1	up
ATP6V1D	CS1	up
OAS2	CS1	up
ALDH3B2	CS1	up
DSCAM	CS1	up
BFSP1	CS1	up
EMILIN1	CS1	up
AHNAK	CS1	up
LY6E	CS1	up
SPECC1	CS1	up
HIF1A	CS1	up
C16orf74	CS1	up
RBMS2	CS1	up
ELFN2	CS1	up
HMOX2	CS1	up
TUBA1A	CS1	up
BATF2	CS1	up
HTR1D	CS1	up
LIMCH1	CS1	up
EPPK1	CS1	up
DCUN1D5	CS1	up
CHST15	CS1	up
ENDOU	CS1	up
TES	CS1	up
LCE1D	CS1	up
KIAA1549L	CS1	up
PLPP7	CS1	up
YKT6	CS1	up
C1R	CS1	up
GLI3	CS1	up
IL13RA2	CS1	up
ENC1	CS1	up
LGALS3BP	CS1	up
AFAP1L2	CS1	up
FOXL1	CS1	up
ANGPTL4	CS1	up
NCF2	CS1	up
PRAG1	CS1	up
OSTM1	CS1	up
TYMP	CS1	up
IFI44	CS1	up
SLC35F2	CS1	up
FOXD1	CS1	up
ZNF319	CS1	up
HOMER2	CS1	up
PLTP	CS1	up
S100A16	CS1	up
FKBP14	CS1	up
LUZP1	CS1	up
DAB2	CS1	up
SOX9	CS1	up
CSDC2	CS1	up
PLA2G4F	CS1	up
FABP3	CS1	up
CD59	CS1	up
CLTCL1	CS1	up
SEMA6B	CS1	up
STC2	CS1	up
COL4A2	CS1	up
TGFB1I1	CS1	up
PKM	CS1	up
TXLNB	CS1	up
IFNK	CS1	up
CARD17	CS1	up
F2RL2	CS1	up
PLAAT2	CS1	up
NEDD4	CS1	up
LAMB1	CS1	up
C4orf54	CS1	up
ANXA2	CS1	up
DUSP29	CS1	up
FAM20C	CS1	up
ELK3	CS1	up
CALU	CS1	up
SPRYD7	CS1	up
ELAVL2	CS1	up
NFASC	CS1	up
KCNE4	CS1	up
CMTM3	CS1	up
SLC27A4	CS1	up
EHD1	CS1	up
ADGRG1	CS1	up
HES2	CS1	up
ADRB2	CS1	up
STRIP2	CS1	up
PGAM1	CS1	up
AIM2	CS1	up
KYNU	CS1	up
GNAI1	CS1	up
BCAR1	CS1	up
N4BP1	CS1	up
C11orf45	CS1	up
BICC1	CS1	up
DISP2	CS1	up
CAB39	CS1	up
CTSB	CS1	up
FNDC1	CS1	up
PHLDA2	CS1	up
ACTB	CS1	up
MYO7B	CS1	up
TCAF2	CS1	up
RCAN1	CS1	up
ITGB4	CS1	up
OBSL1	CS1	up
BCL9L	CS1	up
METRNL	CS1	up
RAB32	CS1	up
TOR4A	CS1	up
CHPF2	CS1	up
COL8A1	CS1	up
BCAM	CS1	up
TNKS1BP1	CS1	up
VCL	CS1	up
P2RY6	CS1	up
CORO2B	CS1	up
PALLD	CS1	up
RECK	CS1	up
SIAH1	CS1	up
MRGPRX3	CS1	up
ANO6	CS1	up
ABCA1	CS1	up
CHRNG	CS1	up
REEP3	CS1	up
TPD52L2	CS1	up
ZNF608	CS1	up
MEF2C	CS1	up
LTBP2	CS1	up
SSPN	CS1	up
STEAP4	CS1	up
EGFR	CS1	up
RAPGEF3	CS1	up
MYH9	CS1	up
CILP	CS1	up
PPP2R3A	CS1	up
KLHL4	CS1	up
SLC2A1	CS1	up
OLFM2	CS1	up
FCGR2A	CS1	up
PLA2G4D	CS1	up
LRRC39	CS1	up
APLP2	CS1	up
KCTD12	CS1	up
ADAMTS1	CS1	up
MBNL2	CS1	up
TXNDC17	CS1	up
TSPAN7	CS1	up
SQLE	CS1	up
GRINA	CS1	up
LRRC3	CS1	up
ATP6V0D1	CS1	up
TGFB3	CS1	up
NUTF2	CS1	up
PDK4	CS1	up
ARC	CS1	up
SEC61G	CS1	up
MYADML2	CS1	up
NABP1	CS1	up
TGM5	CS1	up
AKAP12	CS1	up
IL1RAP	CS1	up
OASL	CS1	up
MVP	CS1	up
PTPN21	CS1	up
GFOD1	CS1	up
VSNL1	CS1	up
MROH6	CS1	up
C20orf194	CS1	up
LATS2	CS1	up
GM2A	CS1	up
ITGB5	CS1	up
NTSR1	CS1	up
ADAMTS6	CS1	up
CXCL5	CS1	up
RNF149	CS1	up
CSGALNACT2	CS1	up
TMPRSS13	CS1	up
ADRA2C	CS1	up
MICALL1	CS1	up
RALB	CS1	up
CCDC9B	CS1	up
CTNNAL1	CS1	up
QSOX1	CS1	up
RET	CS1	up
SBDS	CS1	up
TNFRSF1A	CS1	up
DSG3	CS1	up
NOX4	CS1	up
H2AC6	CS1	up
PPARD	CS1	up
RDH16	CS1	up
DNMT3B	CS1	up
PLOD3	CS1	up
ADARB1	CS1	up
ALDH1L2	CS1	up
NRP2	CS1	up
LAMC1	CS1	up
ITPRIP	CS1	up
STC1	CS1	up
FAM83B	CS1	up
MOCS1	CS1	up
MACF1	CS1	up
GPSM1	CS1	up
TRAF3IP2	CS1	up
GPRC5A	CS1	up
RAET1E	CS1	up
TIMP4	CS1	up
COL24A1	CS1	up
PRR32	CS1	up
RNF152	CS1	up
GPR158	CS1	up
HERC6	CS1	up
GNA15	CS1	up
FAM83H	CS1	up
EPHB2	CS1	up
KRT37	CS1	up
ABTB2	CS1	up
PTH1R	CS1	up
HSPA12A	CS1	up
ACVR1	CS1	up
IBSP	CS1	up
SPRED3	CS1	up
KIF1C	CS1	up
FITM1	CS1	up
MLLT11	CS1	up
MEIS3	CS1	up
PLCB3	CS1	up
KANK1	CS1	up
NEU2	CS1	up
CAP1	CS1	up
DOK5	CS1	up
PLBD2	CS1	up
PYGB	CS1	up
CCM2	CS1	up
NAGS	CS1	up
LYPD3	CS1	up
SPANXC	CS1	up
PKIG	CS1	up
ANGPTL2	CS1	up
TCHHL1	CS1	up
ABRA	CS1	up
POLR2L	CS1	up
NRBF2	CS1	up
BCAT1	CS1	up
SOX11	CS1	up
NCS1	CS1	up
ODAPH	CS1	up
H2AC8	CS1	up
FZD2	CS1	up
CEP170B	CS1	up
KRT5	CS1	up
AIG1	CS1	up
LIPA	CS1	up
COL13A1	CS1	up
NDST1	CS1	up
YIF1A	CS1	up
SRL	CS1	up
SDC3	CS1	up
ODF3L1	CS1	up
FILIP1L	CS1	up
NOG	CS1	up
YIPF7	CS1	up
ZHX3	CS1	up
FADD	CS1	up
ANXA13	CS1	up
AQP10	CS1	up
SLC24A2	CS1	up
CPEB4	CS1	up
CCDC85B	CS1	up
MAP7D3	CS1	up
SLC22A1	CS1	up
MSRB2	CS1	up
DAPK3	CS1	up
PERP	CS1	up
GNG11	CS1	up
TRMT12	CS1	up
MYO1C	CS1	up
DVL1	CS1	up
KRBA1	CS1	up
PPP1R13L	CS1	up
SCN2B	CS1	up
PPP1R1A	CS1	up
RAB7B	CS1	up
DLC1	CS1	up
DRAP1	CS1	up
VSIG4	CS1	up
EFEMP2	CS1	up
PCSK5	CS1	up
LPAR5	CS1	up
ISM1	CS1	up
GFUS	CS1	up
P2RX6	CS1	up
C11orf24	CS1	up
OCIAD2	CS1	up
CDKN1A	CS1	up
IL1F10	CS1	up
SCG2	CS1	up
PLCD4	CS1	up
ZDHHC9	CS1	up
DLGAP4	CS1	up
GAS6	CS1	up
THNSL2	CS1	up
EGFL7	CS1	up
MT1A	CS1	up
OR2W3	CS1	up
LRP12	CS1	up
UCN2	CS1	up
LYVE1	CS1	up
SPRYD3	CS1	up
EVC	CS1	up
TMEM200B	CS1	up
AK4	CS1	up
STARD3NL	CS1	up
SYDE1	CS1	up
STRN3	CS1	up
HLA-C	CS1	up
TRIML1	CS1	up
CAMSAP2	CS1	up
SLC41A2	CS1	up
MRGPRF	CS1	up
SYT12	CS1	up
EFNA3	CS1	up
MT1F	CS1	up
MUL1	CS1	up
ITGB3	CS1	up
RABAC1	CS1	up
HSPB8	CS1	up
UBE2L6	CS1	up
IER3	CS1	up
SRPK2	CS1	up
HAL	CS1	up
PDLIM4	CS1	up
MRAS	CS1	up
GGT5	CS1	up
PCSK1N	CS1	up
GAS1	CS1	up
FAM241A	CS1	up
PALM2AKAP2	CS1	up
SLC35E4	CS1	up
LHFPL2	CS1	up
TMBIM1	CS1	up
REXO2	CS1	up
PCSK1	CS1	up
HLA-B	CS1	up
GPR50	CS1	up
KLHL38	CS1	up
ANO5	CS1	up
FOLR2	CS1	up
MYH6	CS1	up
MCTP1	CS1	up
GALNS	CS1	up
HOXD10	CS1	up
HTATIP2	CS1	up
SH3BGRL3	CS1	up
TSKU	CS1	up
CD109	CS1	up
DUSP7	CS1	up
MEFV	CS1	up
B3GNT4	CS1	up
IGFBP7	CS1	up
COBL	CS1	up
TIPARP	CS1	up
TUBA1C	CS1	up
TBC1D2	CS1	up
CAMK2D	CS1	up
PLD2	CS1	up
MARK3	CS1	up
UBE2E2	CS1	up
STAC	CS1	up
BACE1	CS1	up
DUSP10	CS1	up
GPR157	CS1	up
PI4K2A	CS1	up
SNAI1	CS1	up
IL13RA1	CS1	up
TGFBR1	CS1	up
RIN3	CS1	up
MFSD12	CS1	up
FLG	CS1	up
HDAC9	CS1	up
MB21D2	CS1	up
CPQ	CS1	up
NCKAP5	CS1	up
GXYLT2	CS1	up
HLA-A	CS1	up
EHD4	CS1	up
PCDHB16	CS1	up
TIMP1	CS1	up
PLEKHG5	CS1	up
ASB10	CS1	up
RTN2	CS1	up
TNFAIP1	CS1	up
SEMA7A	CS1	up
IL17RE	CS1	up
MFGE8	CS1	up
YAP1	CS1	up
BRMS1	CS1	up
ECM2	CS1	up
RRAS	CS1	up
DEPDC7	CS1	up
BMP8A	CS1	up
ZSCAN31	CS1	up
CD209	CS1	up
SLC52A2	CS1	up
CFL1	CS1	up
TNFAIP8L3	CS1	up
PLK3	CS1	up
ITPR2	CS1	up
CCL24	CS1	up
IFIT5	CS1	up
KCNA7	CS1	up
BVES	CS1	up
GJC1	CS1	up
ELOVL1	CS1	up
PLEKHN1	CS1	up
EIF2B2	CS1	up
TINAGL1	CS1	up
MYO10	CS1	up
LAD1	CS1	up
STX1A	CS1	up
GJB3	CS1	up
TCEAL9	CS1	up
PEBP4	CS1	up
ERG	CS1	up
ERRFI1	CS1	up
KRTAP2-3	CS1	up
COL27A1	CS1	up
THY1	CS1	up
BEAN1	CS1	up
GSTO1	CS1	up
NCKAP5L	CS1	up
COL28A1	CS1	up
IFI35	CS1	up
WDFY2	CS1	up
SURF4	CS1	up
ALPK3	CS1	up
GALNT10	CS1	up
DSTN	CS1	up
PCDHGB7	CS1	up
EXTL3	CS1	up
EXT1	CS1	up
LIPM	CS1	up
OTUD1	CS1	up
PARVB	CS1	up
PKNOX2	CS1	up
SLC45A3	CS1	up
SALL1	CS1	up
C1QTNF1	CS1	up
PPBP	CS1	up
S100A3	CS1	up
SNX9	CS1	up
PTPRN	CS1	up
LAMA1	CS1	up
PORCN	CS1	up
XAF1	CS1	up
TMC7	CS1	up
ETS1	CS1	up
LAMP1	CS1	up
ARMCX1	CS1	up
GLDN	CS1	up
JUP	CS1	up
KRT19	CS2	up
FDCSP	CS2	up
NTS	CS2	up
FAM3B	CS2	up
EPHX3	CS2	up
KRT13	CS2	up
PLAC8	CS2	up
JCHAIN	CS2	up
FOXA1	CS2	up
CLDN3	CS2	up
PODXL2	CS2	up
SOX2	CS2	up
SYCP2	CS2	up
WFDC2	CS2	up
LTF	CS2	up
CYP4X1	CS2	up
DMRTA2	CS2	up
CD79A	CS2	up
GABRP	CS2	up
TMPRSS11A	CS2	up
MUC4	CS2	up
GSTA1	CS2	up
UPK1B	CS2	up
SPRR3	CS2	up
TMPRSS2	CS2	up
WNK2	CS2	up
ALDH1A1	CS2	up
PCP4L1	CS2	up
SOX21	CS2	up
CXCL17	CS2	up
ADH7	CS2	up
ZNF541	CS2	up
FOXJ1	CS2	up
NEFH	CS2	up
NPPC	CS2	up
SUSD4	CS2	up
EYA2	CS2	up
NTRK2	CS2	up
CDKN2A	CS2	up
ARHGAP4	CS2	up
MSMB	CS2	up
MAP7D2	CS2	up
MZB1	CS2	up
CEL	CS2	up
DAPL1	CS2	up
NOS2	CS2	up
CCL19	CS2	up
STAG3	CS2	up
CALML5	CS2	up
TMSB15A	CS2	up
SYNGR3	CS2	up
KRT24	CS2	up
SMC1B	CS2	up
TLX3	CS2	up
KRT8	CS2	up
HLF	CS2	up
ARHGEF26	CS2	up
SLC44A4	CS2	up
MYB	CS2	up
SVIP	CS2	up
ALDH3A1	CS2	up
MGAT3	CS2	up
YBX2	CS2	up
MEI1	CS2	up
FAM83E	CS2	up
TJP3	CS2	up
DOC2B	CS2	up
ELF3	CS2	up
CLDN10	CS2	up
CEACAM5	CS2	up
CDKN2C	CS2	up
BEX2	CS2	up
M1AP	CS2	up
NUP210	CS2	up
ABCA13	CS2	up
CLDN7	CS2	up
KRT15	CS2	up
MYO3A	CS2	up
ANKRD65	CS2	up
TCP11	CS2	up
ADH1C	CS2	up
ILDR1	CS2	up
PARM1	CS2	up
PRSS21	CS2	up
FADS2	CS2	up
ABCA3	CS2	up
MRAP2	CS2	up
KRT7	CS2	up
KRT4	CS2	up
SPIB	CS2	up
TCIM	CS2	up
PTN	CS2	up
ZBTB7C	CS2	up
PHYHD1	CS2	up
FA2H	CS2	up
MFSD4A	CS2	up
IL17RB	CS2	up
ZYG11A	CS2	up
MUC20	CS2	up
MYH14	CS2	up
RIBC2	CS2	up
PRR15L	CS2	up
ST6GALNAC1	CS2	up
IL34	CS2	up
MSLN	CS2	up
PLEKHG4	CS2	up
POU2AF1	CS2	up
INA	CS2	up
MYO5C	CS2	up
COL9A2	CS2	up
CLGN	CS2	up
ACBD7	CS2	up
ISYNA1	CS2	up
FUT6	CS2	up
KRTCAP3	CS2	up
MAL	CS2	up
NKX2-3	CS2	up
HPDL	CS2	up
CLCA4	CS2	up
TMPRSS11B	CS2	up
FAM3D	CS2	up
FOXRED2	CS2	up
TCEA3	CS2	up
ZFR2	CS2	up
PIK3R3	CS2	up
TSPAN1	CS2	up
PNCK	CS2	up
SBK1	CS2	up
EPCAM	CS2	up
TAF7L	CS2	up
OR2I1P	CS2	up
SLC26A9	CS2	up
ARNT2	CS2	up
IQCG	CS2	up
MOXD1	CS2	up
TNFRSF17	CS2	up
CYP4B1	CS2	up
MS4A1	CS2	up
SLC34A2	CS2	up
HMSD	CS2	up
OLFM1	CS2	up
PBX1	CS2	up
CHDH	CS2	up
RASSF9	CS2	up
GPR143	CS2	up
TMEM178B	CS2	up
BTNL9	CS2	up
IKZF3	CS2	up
FOXE1	CS2	up
PAX1	CS2	up
KCNS1	CS2	up
SLFN13	CS2	up
PIGR	CS2	up
C19orf57	CS2	up
CYP4F12	CS2	up
MUC21	CS2	up
FAM222A	CS2	up
GLB1L2	CS2	up
RNF212	CS2	up
LMO4	CS2	up
RBP7	CS2	up
PLEKHG6	CS2	up
GGT6	CS2	up
C8G	CS2	up
CLIC6	CS2	up
FCGBP	CS2	up
SERPINI1	CS2	up
PHGDH	CS2	up
PNLDC1	CS2	up
CP	CS2	up
SIM2	CS2	up
CCDC74A	CS2	up
MLF1	CS2	up
IRX6	CS2	up
SLC7A2	CS2	up
KLHL23	CS2	up
TMEM150C	CS2	up
MYLIP	CS2	up
SLC25A23	CS2	up
BPIFB1	CS2	up
STOX1	CS2	up
TNFRSF13C	CS2	up
SYNE4	CS2	up
AGR2	CS2	up
CAPN14	CS2	up
CEACAM7	CS2	up
OCA2	CS2	up
BCL2	CS2	up
SCNN1A	CS2	up
BMP7	CS2	up
PARD6A	CS2	up
VPREB3	CS2	up
VCAM1	CS2	up
CLU	CS2	up
SNX31	CS2	up
DUOX2	CS2	up
PRIMA1	CS2	up
SH3BGRL2	CS2	up
DIPK2A	CS2	up
AC136428.1	CS2	up
SCGB3A1	CS2	up
NMU	CS2	up
ELAPOR1	CS2	up
NR5A1	CS2	up
TRPV4	CS2	up
CGN	CS2	up
GIPC2	CS2	up
UPK3B	CS2	up
TMC4	CS2	up
CEP70	CS2	up
UGT8	CS2	up
SPOCK2	CS2	up
CD19	CS2	up
TNFAIP2	CS2	up
RHPN1	CS2	up
ZNF711	CS2	up
IGSF9	CS2	up
ATP13A4	CS2	up
PAX9	CS2	up
PIM2	CS2	up
FAM171A1	CS2	up
TMPRSS4	CS2	up
KHK	CS2	up
GDF15	CS2	up
CYP27A1	CS2	up
C1orf115	CS2	up
PLA2G2D	CS2	up
TENT5C	CS2	up
PPP1R1B	CS2	up
HOXB13	CS2	up
IGLL5	CS2	up
LHX2	CS2	up
HS3ST6	CS2	up
MGST1	CS2	up
FAAH2	CS2	up
ALDH5A1	CS2	up
ZDHHC2	CS2	up
GOLGA8A	CS2	up
RNF165	CS2	up
RIPPLY3	CS2	up
ACSS1	CS2	up
CD27	CS2	up
IL17REL	CS2	up
MROH2A	CS2	up
CXCR4	CS2	up
C4orf19	CS2	up
METTL7A	CS2	up
KEL	CS2	up
IL36A	CS2	up
CCDC146	CS2	up
TBX6	CS2	up
PSCA	CS2	up
OTX1	CS2	up
ARHGAP26	CS2	up
E2F2	CS2	up
LRRC4	CS2	up
GATM	CS2	up
COLCA2	CS2	up
ECHDC2	CS2	up
FMO3	CS2	up
TSPOAP1	CS2	up
EHF	CS2	up
CX3CL1	CS2	up
SGPP2	CS2	up
UCP2	CS2	up
BIRC3	CS2	up
RMI2	CS2	up
ITPKA	CS2	up
MANSC1	CS2	up
TMC8	CS2	up
SLC29A2	CS2	up
MORN3	CS2	up
ZSCAN16	CS2	up
REPIN1	CS2	up
CEACAM1	CS2	up
ZBTB18	CS2	up
ICA1	CS2	up
CRNN	CS2	up
VSIG2	CS2	up
LIPH	CS2	up
SMIM22	CS2	up
PLS1	CS2	up
NPM2	CS2	up
ZFP3	CS2	up
RBBP8NL	CS2	up
ZAP70	CS2	up
PXYLP1	CS2	up
CLDN4	CS2	up
IRAG2	CS2	up
EPHX2	CS2	up
SELENBP1	CS2	up
PYDC1	CS2	up
MEIS1	CS2	up
BICDL1	CS2	up
GGT7	CS2	up
SAMD12	CS2	up
CHPT1	CS2	up
C3orf70	CS2	up
NRCAM	CS2	up
EVA1C	CS2	up
UCHL1	CS2	up
CCDC190	CS2	up
SCNN1B	CS2	up
SMPDL3B	CS2	up
ATP6V0E2	CS2	up
KLHDC7B	CS2	up
SLC9A2	CS2	up
ZIC2	CS2	up
IQCB1	CS2	up
RPS4Y1	CS2	up
ABO	CS2	up
SLC1A1	CS2	up
MAP4K1	CS2	up
ADAM28	CS2	up
GCNT2	CS2	up
RTKN2	CS2	up
ASF1B	CS2	up
SKAP1	CS2	up
KLRG2	CS2	up
CREB3L4	CS2	up
SLC12A7	CS2	up
DERL3	CS2	up
STAR	CS2	up
DUOXA2	CS2	up
MAP1LC3A	CS2	up
COL21A1	CS2	up
ASB9	CS2	up
ATP13A5	CS2	up
ZNF367	CS2	up
ADM2	CS2	up
SYCE2	CS2	up
MAOB	CS2	up
SLC16A14	CS2	up
PRKX	CS2	up
MCM2	CS2	up
RHBDL3	CS2	up
LRRC56	CS2	up
DUSP2	CS2	up
LIPE	CS2	up
RAB42	CS2	up
RASIP1	CS2	up
TTC9	CS2	up
LYPD6	CS2	up
GPC3	CS2	up
PGAP4	CS2	up
MECOM	CS2	up
ARHGEF19	CS2	up
HMX2	CS2	up
ZG16B	CS2	up
WDR76	CS2	up
PLAAT1	CS2	up
RINL	CS2	up
SIGIRR	CS2	up
LMNB1	CS2	up
DBNDD1	CS2	up
SIT1	CS2	up
FAM111B	CS2	up
MIOX	CS2	up
BCL11A	CS2	up
LYPD2	CS2	up
EZH2	CS2	up
KREMEN2	CS2	up
PRSS12	CS2	up
RAPGEFL1	CS2	up
PTPRS	CS2	up
CBX7	CS2	up
REC8	CS2	up
B3GALT5	CS2	up
KLHL35	CS2	up
LGALS9	CS2	up
NOBOX	CS2	up
TMPO	CS2	up
ST6GAL1	CS2	up
RPP25	CS2	up
SCML2	CS2	up
PDE6B	CS2	up
CIART	CS2	up
LY75	CS2	up
ERO1B	CS2	up
SAPCD2	CS2	up
AKR7A3	CS2	up
DLG3	CS2	up
E2F1	CS2	up
SAMD10	CS2	up
CYP2E1	CS2	up
NRTN	CS2	up
FSTL4	CS2	up
ZDHHC23	CS2	up
TFDP2	CS2	up
PRSS36	CS2	up
PLEKHA7	CS2	up
MISP3	CS2	up
P4HTM	CS2	up
GPR160	CS2	up
ZBTB12	CS2	up
ENPP5	CS2	up
MAMDC4	CS2	up
JAK3	CS2	up
IL2RG	CS2	up
PCSK9	CS2	up
PITX1	CS2	up
UBXN11	CS2	up
EPB41L1	CS2	up
SOX30	CS2	up
MCF2L	CS2	up
IKZF2	CS2	up
IGFBP2	CS2	up
SMIM10L2A	CS2	up
FRAT2	CS2	up
LIMD2	CS2	up
SOWAHB	CS2	up
CD5	CS2	up
HID1	CS2	up
SOX14	CS2	up
GSR	CS2	up
CHAF1B	CS2	up
C2orf15	CS2	up
SLC4A11	CS2	up
PSIP1	CS2	up
DHFR	CS2	up
S1PR4	CS2	up
HSH2D	CS2	up
RORB	CS2	up
HMGB2	CS2	up
CCR7	CS2	up
EXOC3L4	CS2	up
RNF207	CS2	up
DEPTOR	CS2	up
L3MBTL4	CS2	up
HS3ST4	CS2	up
PRDX2	CS2	up
FN3K	CS2	up
MYO5B	CS2	up
CAPS	CS2	up
PKDCC	CS2	up
RALGPS1	CS2	up
TP53	CS2	up
RPL39L	CS2	up
SELL	CS2	up
ADGRF1	CS2	up
CD8B2	CS2	up
SLC16A8	CS2	up
HELLS	CS2	up
DMTN	CS2	up
FUT3	CS2	up
FOXD3	CS2	up
SH2D4A	CS2	up
CD79B	CS2	up
OXER1	CS2	up
CD3D	CS2	up
ASRGL1	CS2	up
CXCL13	CS2	up
MNS1	CS2	up
RGMA	CS2	up
PIR	CS2	up
BSPRY	CS2	up
TLX2	CS2	up
GGA2	CS2	up
CDC7	CS2	up
IGFBPL1	CS2	up
NINL	CS2	up
FUZ	CS2	up
HMGN5	CS2	up
NTN1	CS2	up
ADCY5	CS2	up
TNFRSF18	CS2	up
TXNDC16	CS2	up
CENPM	CS2	up
CENPH	CS2	up
PABPC1L	CS2	up
TYMS	CS2	up
ZNF879	CS2	up
EDARADD	CS2	up
CROCC	CS2	up
AMN	CS2	up
COCH	CS2	up
RNF150	CS2	up
KREMEN1	CS2	up
ZBED3	CS2	up
MACC1	CS2	up
AJM1	CS2	up
NFE2L3	CS2	up
CD2	CS2	up
FANCL	CS2	up
VAMP1	CS2	up
C21orf58	CS2	up
MDK	CS2	up
ZCWPW1	CS2	up
OGFRL1	CS2	up
EPHB6	CS2	up
GCNT3	CS2	up
PLLP	CS2	up
LCK	CS2	up
GZMH	CS2	up
RHBDL1	CS2	up
TFF3	CS2	up
BHLHA15	CS2	up
KLRB1	CS2	up
GKAP1	CS2	up
[truncated: 1,001 more rows]

## Sheet: S2
id	logFC	AveExpr	t	P.Value	adj.P.Val	B
DNA_REPLICATION	0.341395	-0.039203	8.37202	5.83184e-16	5.99383e-15	25.5414
MISMATCH_REPAIR	0.317032	-0.0385422	8.25773	1.35858e-15	1.32283e-14	24.7129
BASE_EXCISION_REPAIR	0.295796	-0.0425974	8.85601	1.48052e-17	1.9564e-16	29.1434
SELENOAMINO_ACID_METABOLISM	0.263067	-0.0433024	11.6687	5.75885e-28	3.23103e-26	52.7212
HOMOLOGOUS_RECOMBINATION	0.253179	-0.033956	7.02024	7.3259e-12	4.67342e-11	16.3145
VALINE_LEUCINE_AND_ISOLEUCINE_DEGRADATION	0.241083	-0.0379701	9.87264	4.16339e-21	8.55809e-20	37.1744
PRIMARY_IMMUNODEFICIENCY	0.219292	-0.00828549	5.64213	2.82758e-08	1.16245e-07	8.29801
GLYCINE_SERINE_AND_THREONINE_METABOLISM	0.215491	5.93147e-05	8.92878	8.41509e-18	1.19753e-16	29.6977
SPLICEOSOME	0.204408	-0.0358825	5.90616	6.50847e-09	2.93675e-08	9.71784
TAURINE_AND_HYPOTAURINE_METABOLISM	0.189925	-0.0119198	6.68583	6.20179e-11	3.47676e-10	14.2342
ONE_CARBON_POOL_BY_FOLATE	0.186634	-0.0241345	5.841	9.40005e-09	4.1405e-08	9.3622
BUTANOATE_METABOLISM	0.173723	-0.0108051	7.41019	5.47892e-13	4.0544e-12	18.8445
PROPANOATE_METABOLISM	0.169867	-0.0297802	6.76507	3.76647e-11	2.24773e-10	14.7196
PANTOTHENATE_AND_COA_BIOSYNTHESIS	0.158342	-0.00667471	6.98502	9.20949e-12	5.67919e-11	16.0914
NUCLEOTIDE_EXCISION_REPAIR	0.158075	-0.0419676	5.04638	6.33178e-07	2.09175e-06	5.30599
FATTY_ACID_METABOLISM	0.154313	-0.0220633	7.16005	2.92766e-12	1.93435e-11	17.2088
NON_HOMOLOGOUS_END_JOINING	0.153802	-0.0318309	4.80196	2.084e-06	6.11968e-06	4.16536
LYSINE_DEGRADATION	0.152592	-0.0349657	5.97646	4.36122e-09	2.12323e-08	10.1054
CELL_CYCLE	0.137865	-0.0356799	4.92342	1.16006e-06	3.5182e-06	4.72578
BASAL_TRANSCRIPTION_FACTORS	0.12452	-0.0286334	4.42033	1.21165e-05	3.34559e-05	2.48795
RNA_DEGRADATION	0.109092	-0.0374146	3.72248	0.00021989	0.000528308	-0.24485
VALINE_LEUCINE_AND_ISOLEUCINE_BIOSYNTHESIS	0.10827	-0.0193273	3.21446	0.00139209	0.00302985	-1.95514
GLYCOSYLPHOSPHATIDYLINOSITOL_GPI_ANCHOR_BIOSYNTHESIS	0.10348	-0.0378839	3.5458	0.000428554	0.000991031	-0.866697
ALANINE_ASPARTATE_AND_GLUTAMATE_METABOLISM	0.0879573	-0.01764	4.24884	2.56748e-05	6.78549e-05	1.77591
CYSTEINE_AND_METHIONINE_METABOLISM	0.0867575	-0.0157482	4.57286	6.08439e-06	1.70547e-05	3.14308
TRYPTOPHAN_METABOLISM	0.0864303	0.000402913	4.05463	5.83e-05	0.00014575	1.00124
PEROXISOME	0.0807671	-0.0338732	4.24522	2.60772e-05	6.79475e-05	1.76119
T_CELL_RECEPTOR_SIGNALING_PATHWAY	0.0791129	-0.021683	3.1349	0.0018211	0.00391748	-2.20128
DRUG_METABOLISM_CYTOCHROME_P450	0.0757859	0.0411639	2.45688	0.0143566	0.0262967	-4.05656
ASCORBATE_AND_ALDARATE_METABOLISM	0.0729113	0.0564712	2.36472	0.0184281	0.0318616	-4.27494
ALPHA_LINOLENIC_ACID_METABOLISM	0.0719189	0.0170788	2.41296	0.0161855	0.0287916	-4.16165
NON_SMALL_CELL_LUNG_CANCER	0.0699029	-0.015422	3.11084	0.00197306	0.00419558	-2.27454
COLORECTAL_CANCER	0.068694	-0.0274881	3.07368	0.00223083	0.00468981	-2.38663
HUNTINGTONS_DISEASE	0.0684225	-0.0418047	2.52308	0.0119449	0.0227279	-3.89468
ARACHIDONIC_ACID_METABOLISM	0.0641799	0.0105979	2.2698	0.023648	0.0401366	-4.4913
PENTOSE_AND_GLUCURONATE_INTERCONVERSIONS	0.0629087	0.0296786	2.17376	0.0301954	0.0490013	-4.70139
TASTE_TRANSDUCTION	0.0577639	0.0355364	2.75069	0.00616444	0.0123959	-3.30614
TYROSINE_METABOLISM	0.0557269	0.0120259	2.65516	0.00818206	0.016103	-3.55916
HISTIDINE_METABOLISM	0.0538246	0.0107683	2.39733	0.016884	0.029748	-4.19859
BETA_ALANINE_METABOLISM	0.0523285	0.000189197	2.37831	0.01777	0.0310137	-4.24324
APOPTOSIS	0.0496136	-0.0161579	2.29194	0.0223276	0.0382464	-4.44162
VEGF_SIGNALING_PATHWAY	-0.0356639	-0.0130862	-2.18099	0.0296531	0.0485471	-4.68589
PURINE_METABOLISM	-0.0386282	-0.0157906	-2.4459	0.0147956	0.0265745	-4.083
GLYCEROPHOSPHOLIPID_METABOLISM	-0.0433534	-0.0124032	-2.96346	0.00318829	0.0065537	-2.71148
FRUCTOSE_AND_MANNOSE_METABOLISM	-0.0489557	-0.0259646	-2.24746	0.0250498	0.0421292	-4.54098
MTOR_SIGNALING_PATHWAY	-0.0501119	-0.0183325	-2.47473	0.0136672	0.0255396	-4.01333
ETHER_LIPID_METABOLISM	-0.0507339	0.00472791	-2.64065	0.00853575	0.0166222	-3.59684
NEUROTROPHIN_SIGNALING_PATHWAY	-0.0514659	-0.0179374	-2.46166	0.0141689	0.0262124	-4.04501
GLYCOLYSIS_GLUCONEOGENESIS	-0.056003	0.00544463	-2.45223	0.0145412	0.0263737	-4.06778
SPHINGOLIPID_METABOLISM	-0.0614498	-0.0209219	-2.9929	0.00290127	0.00603074	-2.62584
FC_GAMMA_R_MEDIATED_PHAGOCYTOSIS	-0.0616313	-0.0193104	-2.94315	0.00340119	0.00691451	-2.77009
CELL_ADHESION_MOLECULES_CAMS	-0.068166	0.0127105	-2.23802	0.0256633	0.0427721	-4.56182
PPAR_SIGNALING_PATHWAY	-0.0726354	0.0206568	-3.80093	0.000162094	0.000394571	0.0404164
MAPK_SIGNALING_PATHWAY	-0.072988	-0.00495569	-4.96346	9.5377e-07	2.99064e-06	4.91331
HEMATOPOIETIC_CELL_LINEAGE	-0.0743205	0.0142226	-2.22037	0.026845	0.0443423	-4.60055
MELANOMA	-0.0744351	0.0108654	-3.93843	9.37723e-05	0.000231305	0.553906
N_GLYCAN_BIOSYNTHESIS	-0.0768047	-0.0339017	-2.72119	0.00673348	0.0133946	-3.3852
SYSTEMIC_LUPUS_ERYTHEMATOSUS	-0.076977	0.00208842	-2.5777	0.0102336	0.019721	-3.75794
OTHER_GLYCAN_DEGRADATION	-0.0793911	-0.0256458	-2.52026	0.0120396	0.0227279	-3.90165
PATHWAYS_IN_CANCER	-0.0830673	-0.004508	-4.92413	1.15609e-06	3.5182e-06	4.72906
CYTOSOLIC_DNA_SENSING_PATHWAY	-0.0851179	0.00651601	-3.29861	0.00104148	0.00229374	-1.68835
THYROID_CANCER	-0.0855141	-0.0154814	-3.58352	0.000372498	0.000872305	-0.736345
BASAL_CELL_CARCINOMA	-0.0910185	0.00651343	-4.08108	5.22386e-05	0.000132385	1.10475
CARDIAC_MUSCLE_CONTRACTION	-0.0931889	0.0024078	-3.51897	0.000473115	0.00106739	-0.958583
STARCH_AND_SUCROSE_METABOLISM	-0.0942717	0.0493912	-4.18081	3.43448e-05	8.82469e-05	1.50071
VASOPRESSIN_REGULATED_WATER_REABSORPTION	-0.0969012	-0.013274	-4.85655	1.604e-06	4.78613e-06	4.41567
AMINO_SUGAR_AND_NUCLEOTIDE_SUGAR_METABOLISM	-0.097087	-0.0260282	-4.74595	2.71909e-06	7.85988e-06	3.91121
GNRH_SIGNALING_PATHWAY	-0.0982204	-0.00617786	-5.93662	5.47444e-09	2.59685e-08	9.88529
HEDGEHOG_SIGNALING_PATHWAY	-0.0988055	0.0153638	-5.15457	3.67839e-07	1.33432e-06	5.82722
CYTOKINE_CYTOKINE_RECEPTOR_INTERACTION	-0.0989312	0.0139515	-3.5344	0.000446988	0.0010209	-0.905827
TIGHT_JUNCTION	-0.101178	0.00697684	-5.57066	4.16818e-08	1.67633e-07	7.92349
LONG_TERM_POTENTIATION	-0.101925	0.003122	-5.49984	6.09849e-08	2.30258e-07	7.55647
EPITHELIAL_CELL_SIGNALING_IN_HELICOBACTER_PYLORI_INFECTION	-0.108407	-0.0201123	-5.49983	6.09873e-08	2.30258e-07	7.55643
NEUROACTIVE_LIGAND_RECEPTOR_INTERACTION	-0.110003	0.0462151	-4.98425	8.61125e-07	2.74669e-06	5.01121
ENDOCYTOSIS	-0.110777	-0.0207426	-5.92574	5.82407e-09	2.69363e-08	9.82537
GLIOMA	-0.111333	-0.0102085	-5.04271	6.44827e-07	2.09286e-06	5.28851
LEUKOCYTE_TRANSENDOTHELIAL_MIGRATION	-0.112417	0.0072186	-5.12407	4.29117e-07	1.49786e-06	5.67927
ERBB_SIGNALING_PATHWAY	-0.112986	-0.00644208	-5.09321	5.0113e-07	1.71302e-06	5.53037
VASCULAR_SMOOTH_MUSCLE_CONTRACTION	-0.115638	-0.00183189	-5.75634	1.50804e-08	6.34064e-08	8.90521
GLYCOSPHINGOLIPID_BIOSYNTHESIS_GANGLIO_SERIES	-0.11888	-0.0251346	-3.49293	0.00052051	0.00116017	-1.04718
RENAL_CELL_CARCINOMA	-0.120032	-0.015701	-5.08999	5.09275e-07	1.71302e-06	5.51489
MELANOGENESIS	-0.121199	0.000169203	-6.56361	1.32614e-10	7.21575e-10	13.495
SNARE_INTERACTIONS_IN_VESICULAR_TRANSPORT	-0.124543	-0.0404791	-5.12733	4.22119e-07	1.49786e-06	5.69505
GLYCOSAMINOGLYCAN_BIOSYNTHESIS_HEPARAN_SULFATE	-0.124827	0.00324302	-5.51214	5.70999e-08	2.24755e-07	7.61993
ADHERENS_JUNCTION	-0.126159	-0.00969284	-4.57361	6.06341e-06	1.70547e-05	3.14637
WNT_SIGNALING_PATHWAY	-0.128074	-0.00692158	-7.57174	1.81327e-13	1.39773e-12	19.9246
NOD_LIKE_RECEPTOR_SIGNALING_PATHWAY	-0.131886	-0.0157591	-5.30941	1.66293e-07	6.15283e-07	6.59035
LONG_TERM_DEPRESSION	-0.132858	0.00927979	-7.66934	9.21566e-14	7.74953e-13	20.5861
LYSOSOME	-0.135264	-0.0335274	-5.82238	1.04354e-08	4.48963e-08	9.26116
CALCIUM_SIGNALING_PATHWAY	-0.135465	0.0202482	-7.60236	1.46741e-13	1.18031e-12	20.1315
OLFACTORY_TRANSDUCTION	-0.137719	0.0996066	-4.37507	1.4808e-05	4.02865e-05	2.29751
BLADDER_CANCER	-0.143165	-0.0195662	-7.20642	2.15309e-12	1.52275e-11	17.5086
PROTEASOME	-0.144831	-0.0358819	-3.65127	0.000288684	0.000684699	-0.498927
STEROID_BIOSYNTHESIS	-0.147775	-0.0162076	-4.27503	2.29297e-05	6.14781e-05	1.88297
PRION_DISEASES	-0.152295	0.00979428	-7.20165	2.2224e-12	1.52275e-11	17.4777
O_GLYCAN_BIOSYNTHESIS	-0.158621	0.0178131	-6.32977	5.50168e-10	2.90803e-09	12.1127
AXON_GUIDANCE	-0.160643	0.00527856	-7.8862	2.00109e-14	1.76286e-13	22.0797
NICOTINATE_AND_NICOTINAMIDE_METABOLISM	-0.167472	0.000138614	-8.49675	2.29499e-16	2.65358e-15	26.4554
GLYCOSAMINOGLYCAN_BIOSYNTHESIS_KERATAN_SULFATE	-0.1696	-0.00667243	-6.04487	2.94301e-09	1.51238e-08	10.4863
VIBRIO_CHOLERAE_INFECTION	-0.169995	-0.0101086	-9.83212	5.8333e-21	1.07916e-19	36.8428
TGF_BETA_SIGNALING_PATHWAY	-0.181025	-0.00724417	-8.51463	2.00624e-16	2.47436e-15	26.5872
GLYCOSAMINOGLYCAN_DEGRADATION	-0.181532	-0.0184652	-6.75551	4.00115e-11	2.31317e-10	14.6607
GAP_JUNCTION	-0.187457	0.0037379	-9.31346	4.02727e-19	6.77314e-18	32.6817
RENIN_ANGIOTENSIN_SYSTEM	-0.187695	0.00880226	-6.03232	3.16413e-09	1.58207e-08	10.4161
REGULATION_OF_ACTIN_CYTOSKELETON	-0.194037	0.00365979	-10.0046	1.37932e-21	3.18968e-20	38.2606
GALACTOSE_METABOLISM	-0.207793	-0.00070329	-8.42597	3.90065e-16	4.24482e-15	25.9355
COMPLEMENT_AND_COAGULATION_CASCADES	-0.21952	0.0349728	-8.12041	3.71072e-15	3.43242e-14	23.7289
PATHOGENIC_ESCHERICHIA_COLI_INFECTION	-0.22074	-0.0162776	-10.487	2.24939e-23	5.94481e-22	42.3097
ARRHYTHMOGENIC_RIGHT_VENTRICULAR_CARDIOMYOPATHY_ARVC	-0.275686	0.0119755	-11.5154	2.35531e-27	7.26222e-26	51.3335
DILATED_CARDIOMYOPATHY	-0.280996	0.0110301	-11.6477	6.98602e-28	3.23103e-26	52.5309
GLYCOSAMINOGLYCAN_BIOSYNTHESIS_CHONDROITIN_SULFATE	-0.303763	-0.0220476	-9.10458	2.12105e-18	3.26995e-17	31.0503
FOCAL_ADHESION	-0.303933	0.00471024	-11.5485	1.73819e-27	6.4313e-26	51.6328
HYPERTROPHIC_CARDIOMYOPATHY_HCM	-0.308152	0.00716085	-12.7213	2.78484e-32	5.15196e-30	62.5161
ECM_RECEPTOR_INTERACTION	-0.387742	0.0153167	-12.5895	9.90304e-32	9.16031e-30	61.2652

## Sheet: S3
Model	TCGA	GSE27020	GSE41613	GSE42743	GSE65858
CoxBoost+Enet[alpha=0.1]	0.660539	0.691477	0.670774	0.6627	0.607383
CoxBoost+Enet[alpha=0.2]	0.660266	0.69371	0.673926	0.659596	0.606832
CoxBoost+Enet[alpha=0.3]	0.66017	0.691477	0.67192	0.653389	0.610383
CoxBoost+Enet[alpha=0.4]	0.660298	0.691105	0.672779	0.652354	0.609098
CoxBoost+Enet[alpha=0.5]	0.660025	0.689617	0.674212	0.648733	0.610383
CoxBoost+Enet[alpha=0.6]	0.659961	0.691105	0.673926	0.64925	0.611179
CoxBoost+Enet[alpha=0.7]	0.659961	0.691105	0.673639	0.648733	0.61124
CoxBoost+Enet[alpha=0.8]	0.659913	0.691477	0.674499	0.64925	0.611424
CoxBoost+Enet[alpha=0.9]	0.65948	0.69185	0.67106	0.645629	0.609955
CoxBoost+GBM	0.634418	0.692222	0.619771	0.58536	0.593639
CoxBoost+Lasso	0.659833	0.691477	0.672779	0.647698	0.611546
CoxBoost+plsRcox	0.659287	0.685523	0.668481	0.6627	0.611302
CoxBoost+Ridge	0.660587	0.690733	0.670201	0.660631	0.61124
CoxBoost+RSF	0.647703	0.654447	0.620917	0.546301	0.599027
CoxBoost+StepCox[backward]	0.656124	0.715296	0.656447	0.603207	0.572426
CoxBoost+StepCox[both]	0.656124	0.715296	0.656447	0.603207	0.572426
CoxBoost+StepCox[forward]	0.660427	0.688128	0.673352	0.648215	0.612893
CoxBoost+SuperPC	0.662434	0.705992	0.672493	0.656492	0.616689
CoxBoost+survivalSVM	0.585178	0.549684	0.575931	0.601138	0.538937
Enet[alpha=0.1]+CoxBoost	0.660459	0.692594	0.672206	0.660114	0.607934
Enet[alpha=0.1]+GBM	0.641354	0.695757	0.627364	0.574496	0.593272
Enet[alpha=0.1]+Lasso	0.659752	0.693338	0.673352	0.646663	0.610444
Enet[alpha=0.1]+plsRcox	0.659463	0.698921	0.673926	0.661148	0.612159
Enet[alpha=0.1]+Ridge	0.661053	0.698176	0.672779	0.661666	0.612097
Enet[alpha=0.1]+RSF	0.655418	0.657797	0.623926	0.548888	0.595261
Enet[alpha=0.1]+StepCox[backward]	0.656124	0.715296	0.656447	0.603207	0.572426
Enet[alpha=0.1]+StepCox[both]	0.656124	0.715296	0.656447	0.603207	0.572426
Enet[alpha=0.1]+StepCox[forward]	0.66025	0.687012	0.673066	0.647698	0.611791
Enet[alpha=0.1]+SuperPC	0.661695	0.706736	0.669914	0.661148	0.616261
Enet[alpha=0.1]+survivalSVM	0.594747	0.585039	0.603725	0.612002	0.547202
Enet[alpha=0.2]+CoxBoost	0.660379	0.692222	0.672206	0.652871	0.610261
Enet[alpha=0.2]+GBM	0.640784	0.694269	0.633381	0.581221	0.588496
Enet[alpha=0.2]+Lasso	0.659672	0.692594	0.673926	0.648215	0.611791
Enet[alpha=0.2]+plsRcox	0.659463	0.698921	0.673926	0.661148	0.612159
Enet[alpha=0.2]+Ridge	0.661101	0.698176	0.672493	0.663218	0.611853
Enet[alpha=0.2]+RSF	0.639499	0.63249	0.61404	0.522504	0.580446
Enet[alpha=0.2]+StepCox[backward]	0.656124	0.715296	0.656447	0.603207	0.572426
Enet[alpha=0.2]+StepCox[both]	0.656124	0.715296	0.656447	0.603207	0.572426
Enet[alpha=0.2]+StepCox[forward]	0.66025	0.687012	0.673066	0.647698	0.611791
Enet[alpha=0.2]+SuperPC	0.661695	0.706736	0.669914	0.661148	0.616261
Enet[alpha=0.2]+survivalSVM	0.594747	0.585039	0.603725	0.612002	0.547202
Enet[alpha=0.3]+CoxBoost	0.660427	0.692594	0.673639	0.649767	0.609955
Enet[alpha=0.3]+GBM	0.637123	0.700037	0.624069	0.583808	0.591772
Enet[alpha=0.3]+Lasso	0.659496	0.691477	0.673639	0.646146	0.611485
Enet[alpha=0.3]+plsRcox	0.659287	0.685523	0.668481	0.6627	0.611302
Enet[alpha=0.3]+Ridge	0.660619	0.690733	0.669914	0.658562	0.611546
Enet[alpha=0.3]+RSF	0.648988	0.656494	0.62894	0.546818	0.597404
Enet[alpha=0.3]+StepCox[backward]	0.656124	0.715296	0.656447	0.603207	0.572426
Enet[alpha=0.3]+StepCox[both]	0.656124	0.715296	0.656447	0.603207	0.572426
Enet[alpha=0.3]+StepCox[forward]	0.660427	0.688128	0.673352	0.648215	0.612893
Enet[alpha=0.3]+SuperPC	0.662434	0.705992	0.672493	0.656492	0.616689
Enet[alpha=0.3]+survivalSVM	0.585178	0.549684	0.575931	0.601138	0.538937
Enet[alpha=0.4]+CoxBoost	0.660218	0.69185	0.672493	0.652871	0.610261
Enet[alpha=0.4]+GBM	0.635927	0.695199	0.625788	0.5776	0.589353
Enet[alpha=0.4]+Lasso	0.659785	0.692222	0.673926	0.648733	0.611853
Enet[alpha=0.4]+plsRcox	0.659287	0.685523	0.668481	0.6627	0.611302
Enet[alpha=0.4]+Ridge	0.660587	0.690733	0.670201	0.660631	0.61124
Enet[alpha=0.4]+RSF	0.638119	0.641049	0.615473	0.531816	0.58014
Enet[alpha=0.4]+StepCox[backward]	0.656124	0.715296	0.656447	0.603207	0.572426
Enet[alpha=0.4]+StepCox[both]	0.656124	0.715296	0.656447	0.603207	0.572426
Enet[alpha=0.4]+StepCox[forward]	0.660427	0.688128	0.673352	0.648215	0.612893
Enet[alpha=0.4]+SuperPC	0.662434	0.705992	0.672493	0.656492	0.616689
Enet[alpha=0.4]+survivalSVM	0.585178	0.549684	0.575931	0.601138	0.538937
Enet[alpha=0.5]+CoxBoost	0.660603	0.692222	0.672493	0.651319	0.60971
Enet[alpha=0.5]+GBM	0.634129	0.702084	0.624785	0.578117	0.588496
Enet[alpha=0.5]+Lasso	0.659496	0.691477	0.673639	0.646146	0.611485
Enet[alpha=0.5]+plsRcox	0.659287	0.685523	0.668481	0.6627	0.611302
Enet[alpha=0.5]+Ridge	0.660587	0.690733	0.670201	0.660631	0.61124
Enet[alpha=0.5]+RSF	0.640535	0.640491	0.613754	0.522504	0.583752
Enet[alpha=0.5]+StepCox[backward]	0.656124	0.715296	0.656447	0.603207	0.572426
Enet[alpha=0.5]+StepCox[both]	0.656124	0.715296	0.656447	0.603207	0.572426
Enet[alpha=0.5]+StepCox[forward]	0.660427	0.688128	0.673352	0.648215	0.612893
Enet[alpha=0.5]+SuperPC	0.662434	0.705992	0.672493	0.656492	0.616689
Enet[alpha=0.5]+survivalSVM	0.585178	0.549684	0.575931	0.601138	0.538937
Enet[alpha=0.6]+CoxBoost	0.660379	0.690361	0.672779	0.652354	0.610689
Enet[alpha=0.6]+GBM	0.640278	0.704875	0.630229	0.577082	0.590455
Enet[alpha=0.6]+Lasso	0.659496	0.691477	0.673639	0.646146	0.611485
Enet[alpha=0.6]+plsRcox	0.659287	0.685523	0.668481	0.6627	0.611302
Enet[alpha=0.6]+Ridge	0.660603	0.690733	0.670201	0.658562	0.612036
Enet[alpha=0.6]+RSF	0.644163	0.645143	0.617479	0.538541	0.595751
Enet[alpha=0.6]+StepCox[backward]	0.656124	0.715296	0.656447	0.603207	0.572426
Enet[alpha=0.6]+StepCox[both]	0.656124	0.715296	0.656447	0.603207	0.572426
Enet[alpha=0.6]+StepCox[forward]	0.660427	0.688128	0.673352	0.648215	0.612893
Enet[alpha=0.6]+SuperPC	0.662434	0.705992	0.672493	0.656492	0.616689
Enet[alpha=0.6]+survivalSVM	0.585178	0.549684	0.575931	0.601138	0.538937
Enet[alpha=0.7]+CoxBoost	0.660298	0.69185	0.672493	0.652871	0.609649
Enet[alpha=0.7]+GBM	0.635711	0.695013	0.634957	0.57553	0.593884
Enet[alpha=0.7]+Lasso	0.659785	0.692222	0.673926	0.648733	0.611853
Enet[alpha=0.7]+plsRcox	0.659287	0.685523	0.668481	0.6627	0.611302
Enet[alpha=0.7]+Ridge	0.660619	0.690733	0.669914	0.658562	0.611546
Enet[alpha=0.7]+RSF	0.642437	0.661705	0.622636	0.535954	0.598078
Enet[alpha=0.7]+StepCox[backward]	0.656124	0.715296	0.656447	0.603207	0.572426
Enet[alpha=0.7]+StepCox[both]	0.656124	0.715296	0.656447	0.603207	0.572426
Enet[alpha=0.7]+StepCox[forward]	0.660427	0.688128	0.673352	0.648215	0.612893
Enet[alpha=0.7]+SuperPC	0.662434	0.705992	0.672493	0.656492	0.616689
Enet[alpha=0.7]+survivalSVM	0.585178	0.549684	0.575931	0.601138	0.538937
Enet[alpha=0.8]+CoxBoost	0.660363	0.692222	0.672779	0.652354	0.609955
Enet[alpha=0.8]+GBM	0.635285	0.697804	0.628367	0.58148	0.587027
Enet[alpha=0.8]+Lasso	0.659528	0.69185	0.673352	0.646146	0.611424
Enet[alpha=0.8]+plsRcox	0.659287	0.685523	0.668481	0.6627	0.611302
Enet[alpha=0.8]+Ridge	0.660619	0.690733	0.669914	0.658562	0.611546
Enet[alpha=0.8]+RSF	0.649341	0.640677	0.627937	0.531816	0.58718
Enet[alpha=0.8]+StepCox[backward]	0.656124	0.715296	0.656447	0.603207	0.572426
Enet[alpha=0.8]+StepCox[both]	0.656124	0.715296	0.656447	0.603207	0.572426
Enet[alpha=0.8]+StepCox[forward]	0.660427	0.688128	0.673352	0.648215	0.612893
Enet[alpha=0.8]+SuperPC	0.662434	0.705992	0.672493	0.656492	0.616689
Enet[alpha=0.8]+survivalSVM	0.585178	0.549684	0.575931	0.601138	0.538937
Enet[alpha=0.9]+CoxBoost	0.66025	0.692222	0.673352	0.653389	0.608669
Enet[alpha=0.9]+GBM	0.636305	0.694641	0.617192	0.569064	0.59419
Enet[alpha=0.9]+Lasso	0.659881	0.689989	0.673066	0.64925	0.611853
Enet[alpha=0.9]+plsRcox	0.657906	0.681801	0.665043	0.663735	0.60671
Enet[alpha=0.9]+Ridge	0.660475	0.688128	0.670774	0.663218	0.610628
Enet[alpha=0.9]+RSF	0.643561	0.631373	0.622779	0.543714	0.572579
Enet[alpha=0.9]+StepCox[backward]	0.656124	0.715296	0.656447	0.603207	0.572426
Enet[alpha=0.9]+StepCox[both]	0.656124	0.715296	0.656447	0.603207	0.572426
Enet[alpha=0.9]+StepCox[forward]	0.660411	0.6885	0.674212	0.649767	0.612771
Enet[alpha=0.9]+SuperPC	0.660234	0.697804	0.669914	0.6627	0.609036
Enet[alpha=0.9]+survivalSVM	0.624255	0.635281	0.642407	0.651319	0.594527
GBM+CoxBoost	0.66033	0.698921	0.67106	0.649767	0.60622
GBM+Enet[alpha=0.1]	0.660571	0.701154	0.672493	0.662183	0.609832
GBM+Enet[alpha=0.2]	0.660539	0.69706	0.67106	0.659596	0.607873
GBM+Enet[alpha=0.3]	0.66078	0.69706	0.670487	0.657527	0.607016
GBM+Enet[alpha=0.4]	0.660106	0.698921	0.672206	0.652871	0.607261
GBM+Enet[alpha=0.5]	0.660074	0.698921	0.672493	0.651837	0.607506
GBM+Enet[alpha=0.6]	0.660009	0.696688	0.67192	0.646663	0.607689
GBM+Enet[alpha=0.7]	0.659399	0.696316	0.671633	0.647698	0.607506
GBM+Enet[alpha=0.8]	0.659046	0.69706	0.671347	0.646146	0.607016
GBM+Enet[alpha=0.9]	0.659303	0.695571	0.670774	0.644077	0.608791
GBM+Lasso	0.658709	0.698549	0.668768	0.640973	0.605485
GBM+plsRcox	0.651821	0.710086	0.659026	0.634247	0.569548
GBM+Ridge	0.660041	0.705992	0.675072	0.662183	0.606955
GBM+RSF	0.641097	0.653145	0.621203	0.54837	0.589629
GBM+StepCox[backward]	0.660395	0.659844	0.639542	0.549405	0.561344
GBM+StepCox[both]	0.660395	0.659844	0.639542	0.549405	0.561344
GBM+StepCox[forward]	0.668149	0.599926	0.65043	0.619245	0.588894
GBM+SuperPC	0.641209	0.724228	0.671347	0.651837	0.582527
GBM+survivalSVM	0.61093	0.66617	0.656447	0.631143	0.566548
Lasso+CoxBoost	0.659977	0.690361	0.672493	0.649767	0.612036
Lasso+Enet[alpha=0.1]	0.659014	0.688128	0.672206	0.651837	0.611546
Lasso+Enet[alpha=0.2]	0.659239	0.688128	0.67192	0.649767	0.611424
Lasso+Enet[alpha=0.3]	0.659399	0.690361	0.672206	0.646663	0.61173
Lasso+Enet[alpha=0.4]	0.65948	0.689989	0.672493	0.648733	0.611302
Lasso+Enet[alpha=0.5]	0.659961	0.690733	0.672779	0.64925	0.612342
Lasso+Enet[alpha=0.6]	0.65964	0.690361	0.673352	0.648733	0.611424
Lasso+Enet[alpha=0.7]	0.659624	0.689989	0.673066	0.64925	0.611485
Lasso+Enet[alpha=0.8]	0.659977	0.690361	0.672493	0.649767	0.612281
Lasso+Enet[alpha=0.9]	0.659897	0.690361	0.672493	0.64925	0.612465
Lasso+GBM	0.641025	0.700782	0.621347	0.576565	0.587241
Lasso+plsRcox	0.656525	0.670636	0.668768	0.666322	0.615771
Lasso+Ridge	0.659576	0.680685	0.672779	0.659079	0.614546
Lasso+RSF	0.637766	0.633048	0.625358	0.526125	0.587823
Lasso+StepCox[backward]	0.656124	0.715296	0.656447	0.603207	0.572426
Lasso+StepCox[both]	0.656124	0.715296	0.656447	0.603207	0.572426
Lasso+StepCox[forward]	0.660122	0.6885	0.673352	0.64925	0.613138
Lasso+SuperPC	0.656445	0.690361	0.661605	0.67046	0.619444
Lasso+survivalSVM	0.64678	0.686267	0.665616	0.635282	0.588649
plsRcox+CoxBoost	0.653395	0.70227	0.653868	0.639938	0.596057
plsRcox+Enet[alpha=0.1]	0.654326	0.700037	0.652722	0.64149	0.597343
plsRcox+Enet[alpha=0.2]	0.654053	0.700782	0.653009	0.638386	0.597098
plsRcox+Enet[alpha=0.3]	0.654053	0.703015	0.653009	0.635799	0.595935
plsRcox+Enet[alpha=0.4]	0.653957	0.703759	0.655014	0.636317	0.596547
plsRcox+Enet[alpha=0.5]	0.653892	0.702642	0.654441	0.638903	0.596976
plsRcox+Enet[alpha=0.6]	0.65386	0.701526	0.652722	0.639938	0.596976
plsRcox+Enet[alpha=0.7]	0.654069	0.700782	0.653868	0.639938	0.596731
plsRcox+Enet[alpha=0.8]	0.653973	0.703015	0.654441	0.637869	0.596057
plsRcox+Enet[alpha=0.9]	0.654021	0.702642	0.654728	0.637869	0.596302
plsRcox+GBM	0.630316	0.676777	0.602149	0.549922	0.581946
plsRcox+Lasso	0.653748	0.701898	0.653582	0.638903	0.596425
plsRcox+Ridge	0.65309	0.705247	0.64957	0.654941	0.595506
plsRcox+RSF	0.624376	0.63342	0.617192	0.524573	0.589935
plsRcox+StepCox[backward]	0.655498	0.675102	0.642693	0.572168	0.567589
plsRcox+StepCox[both]	0.655498	0.675102	0.642693	0.572168	0.567589
plsRcox+StepCox[forward]	0.659126	0.633048	0.638395	0.596999	0.574752
plsRcox+SuperPC	0.640085	0.706736	0.667049	0.662183	0.591772
plsRcox+survivalSVM	0.605118	0.649795	0.64212	0.648733	0.561467
RSF+CoxBoost	0.659496	0.713063	0.670201	0.634247	0.590241
RSF+Enet[alpha=0.1]	0.661149	0.719762	0.673926	0.636317	0.594037
RSF+Enet[alpha=0.2]	0.660122	0.718273	0.673639	0.638903	0.591955
RSF+Enet[alpha=0.3]	0.660025	0.71604	0.672206	0.636834	0.59116
RSF+Enet[alpha=0.4]	0.65948	0.713807	0.670201	0.63373	0.591221
RSF+Enet[alpha=0.5]	0.659447	0.713063	0.671347	0.631661	0.590915
RSF+Enet[alpha=0.6]	0.659335	0.713807	0.67192	0.630626	0.590364
RSF+Enet[alpha=0.7]	0.658741	0.713435	0.673066	0.629074	0.590058
RSF+Enet[alpha=0.8]	0.658404	0.713807	0.672779	0.630626	0.59018
RSF+Enet[alpha=0.9]	0.658516	0.714552	0.672206	0.628557	0.590486
RSF+GBM	0.640535	0.703015	0.626934	0.58717	0.560212
RSF+Lasso	0.658709	0.713435	0.67192	0.627005	0.590058
RSF+plsRcox	0.654824	0.69371	0.666189	0.632178	0.561038
RSF+Ridge	0.659961	0.72125	0.678797	0.649767	0.594772
RSF+StepCox[backward]	0.660395	0.659844	0.639542	0.549405	0.561344
RSF+StepCox[both]	0.660395	0.659844	0.639542	0.549405	0.561344
RSF+StepCox[forward]	0.66961	0.663193	0.660172	0.605794	0.571262
RSF+SuperPC	0.647133	0.726089	0.67765	0.658562	0.591343
RSF+survivalSVM	0.608586	0.663937	0.646132	0.619245	0.55761
StepCox[backward]+CoxBoost	0.661165	0.686639	0.644126	0.57165	0.568814
StepCox[backward]+Enet[alpha=0.1]	0.661037	0.675475	0.644699	0.566994	0.56912
StepCox[backward]+Enet[alpha=0.2]	0.661021	0.6885	0.645272	0.57372	0.568507
StepCox[backward]+Enet[alpha=0.3]	0.660924	0.673614	0.644986	0.561304	0.568201
StepCox[backward]+Enet[alpha=0.4]	0.655707	0.717901	0.653582	0.607346	0.571385
StepCox[backward]+Enet[alpha=0.5]	0.655193	0.717157	0.653868	0.607863	0.570895
StepCox[backward]+Enet[alpha=0.6]	0.661085	0.665426	0.64212	0.554061	0.564589
StepCox[backward]+Enet[alpha=0.7]	0.661037	0.665798	0.641547	0.553544	0.564589
StepCox[backward]+Enet[alpha=0.8]	0.660989	0.665798	0.640974	0.553026	0.564528
StepCox[backward]+Enet[alpha=0.9]	0.661406	0.66617	0.640974	0.555613	0.565814
StepCox[backward]+GBM	0.627089	0.712691	0.619341	0.576306	0.54059
StepCox[backward]+Lasso	0.661181	0.665798	0.642407	0.554061	0.56514
StepCox[backward]+plsRcox	0.654165	0.713435	0.65043	0.600621	0.569671
StepCox[backward]+Ridge	0.660555	0.689245	0.647278	0.57372	0.569365
StepCox[backward]+RSF	0.633519	0.699479	0.640974	0.561562	0.575425
StepCox[backward]+SuperPC	0.643409	0.715668	0.659026	0.622349	0.57414
StepCox[backward]+survivalSVM	0.632363	0.69706	0.624642	0.585101	0.549467
StepCox[both]+CoxBoost	0.661037	0.678452	0.644413	0.564925	0.569732
StepCox[both]+Enet[alpha=0.1]	0.655369	0.71939	0.653868	0.608898	0.571569
StepCox[both]+Enet[alpha=0.2]	0.661133	0.67808	0.644986	0.566994	0.569671
StepCox[both]+Enet[alpha=0.3]	0.66131	0.666543	0.64212	0.558717	0.566487
StepCox[both]+Enet[alpha=0.4]	0.66139	0.668403	0.643266	0.558717	0.567222
StepCox[both]+Enet[alpha=0.5]	0.655755	0.717529	0.653295	0.605794	0.571507
StepCox[both]+Enet[alpha=0.6]	0.661085	0.665426	0.64212	0.554061	0.564589
StepCox[both]+Enet[alpha=0.7]	0.661374	0.66617	0.641547	0.555613	0.56563
StepCox[both]+Enet[alpha=0.8]	0.661133	0.665426	0.64212	0.554061	0.564406
StepCox[both]+Enet[alpha=0.9]	0.661165	0.665798	0.641834	0.553544	0.564589
StepCox[both]+GBM	0.631857	0.710272	0.621777	0.566218	0.538876
StepCox[both]+Lasso	0.655	0.717157	0.653868	0.605794	0.57065
StepCox[both]+plsRcox	0.654165	0.713435	0.65043	0.600621	0.569671
StepCox[both]+Ridge	0.658324	0.708225	0.651003	0.591826	0.572242
StepCox[both]+RSF	0.634274	0.696502	0.635387	0.568288	0.57616
StepCox[both]+SuperPC	0.643409	0.715668	0.659026	0.622349	0.57414
StepCox[both]+survivalSVM	0.632363	0.69706	0.624642	0.585101	0.549467
StepCox[forward]+CoxBoost	0.660154	0.697804	0.673066	0.650802	0.607077
StepCox[forward]+Enet[alpha=0.1]	0.660523	0.699665	0.672779	0.661666	0.610077
StepCox[forward]+Enet[alpha=0.2]	0.660122	0.701526	0.669914	0.657527	0.606526
StepCox[forward]+Enet[alpha=0.3]	0.660764	0.69706	0.670487	0.658044	0.607077
StepCox[forward]+Enet[alpha=0.4]	0.66009	0.698921	0.67192	0.652354	0.607322
StepCox[forward]+Enet[alpha=0.5]	0.660074	0.698921	0.672779	0.651837	0.607506
StepCox[forward]+Enet[alpha=0.6]	0.660025	0.69706	0.67192	0.646663	0.607751
StepCox[forward]+Enet[alpha=0.7]	0.659768	0.694827	0.672493	0.646146	0.608547
StepCox[forward]+Enet[alpha=0.8]	0.659303	0.696316	0.671347	0.645629	0.607812
StepCox[forward]+Enet[alpha=0.9]	0.659094	0.694827	0.669341	0.643559	0.607445
StepCox[forward]+GBM	0.633463	0.649237	0.613324	0.598551	0.600986
StepCox[forward]+Lasso	0.659142	0.695199	0.669628	0.644077	0.608547
StepCox[forward]+plsRcox	0.649686	0.70227	0.660172	0.647698	0.573772
StepCox[forward]+Ridge	0.657457	0.716412	0.675358	0.67046	0.609036
StepCox[forward]+RSF	0.638191	0.631559	0.627507	0.542162	0.586323
StepCox[forward]+SuperPC	0.644822	0.725716	0.679943	0.661148	0.588956
StepCox[forward]+survivalSVM	0.614334	0.668403	0.657307	0.661666	0.576711
SuperPC+CoxBoost	0.653298	0.701898	0.653868	0.640973	0.595935
SuperPC+Enet[alpha=0.1]	0.65431	0.699665	0.651862	0.642007	0.597221
SuperPC+Enet[alpha=0.2]	0.654053	0.700782	0.653009	0.638386	0.597098
SuperPC+Enet[alpha=0.3]	0.654053	0.703015	0.653009	0.635799	0.595935
SuperPC+Enet[alpha=0.4]	0.653957	0.703759	0.655014	0.636317	0.596547
SuperPC+Enet[alpha=0.5]	0.653892	0.702642	0.654441	0.638903	0.596976
SuperPC+Enet[alpha=0.6]	0.654069	0.701154	0.654155	0.639421	0.597098
SuperPC+Enet[alpha=0.7]	0.653876	0.700409	0.654441	0.639421	0.596608
SuperPC+Enet[alpha=0.8]	0.653925	0.701154	0.655014	0.638386	0.596976
SuperPC+Enet[alpha=0.9]	0.653973	0.703387	0.653868	0.638386	0.595935
SuperPC+GBM	0.627523	0.653517	0.604298	0.571133	0.602149
SuperPC+Lasso	0.6537	0.701154	0.652436	0.638386	0.596731
SuperPC+plsRcox	0.649766	0.686639	0.633811	0.624418	0.553814
SuperPC+Ridge	0.653475	0.704875	0.653582	0.645629	0.59318
SuperPC+RSF	0.618733	0.589133	0.600143	0.520952	0.587272
SuperPC+StepCox[backward]	0.651886	0.716412	0.653582	0.628039	0.578119
SuperPC+StepCox[both]	0.651886	0.716412	0.653582	0.628039	0.578119
SuperPC+StepCox[forward]	0.654856	0.624116	0.617765	0.642525	0.584364
SuperPC+survivalSVM	0.595855	0.644957	0.617192	0.624935	0.543529
Ridge+CoxBoost	0.660379	0.69371	0.673926	0.650285	0.60922
Ridge+Enet[alpha=0.1]	0.660668	0.70227	0.672206	0.661666	0.609771
Ridge+Enet[alpha=0.2]	0.660363	0.698176	0.670774	0.657527	0.607445
Ridge+Enet[alpha=0.3]	0.660603	0.69371	0.673926	0.654423	0.60971
Ridge+Enet[alpha=0.4]	0.660379	0.691477	0.672206	0.651837	0.609342
Ridge+Enet[alpha=0.5]	0.660074	0.694083	0.672779	0.650285	0.608791
Ridge+Enet[alpha=0.6]	0.660025	0.692222	0.672779	0.644594	0.609587
Ridge+Enet[alpha=0.7]	0.66269	0.66617	0.65702	0.627005	0.608608
Ridge+Enet[alpha=0.8]	0.659608	0.692594	0.67192	0.646146	0.609526
Ridge+Enet[alpha=0.9]	0.659463	0.69185	0.670487	0.645629	0.610016
Ridge+GBM	0.632869	0.656494	0.620201	0.590274	0.59921
Ridge+Lasso	0.659592	0.693338	0.670774	0.644594	0.610383
Ridge+plsRcox	0.656044	0.716785	0.674499	0.665804	0.601322
Ridge+RSF	0.65142	0.648307	0.631232	0.560786	0.6012
Ridge+StepCox[backward]	0.656927	0.634164	0.626648	0.580962	0.563793
Ridge+StepCox[both]	0.656927	0.634164	0.626648	0.580962	0.563793
Ridge+StepCox[forward]	0.662225	0.633792	0.642693	0.62597	0.604139
Ridge+SuperPC	0.656236	0.723111	0.673066	0.658044	0.594955
Ridge+survivalSVM	0.604524	0.595087	0.600287	0.627522	0.54408
CoxBoost	0.660555	0.699293	0.67106	0.651837	0.605669
Enet[alpha=0.1]	0.66078	0.701526	0.673352	0.660114	0.609159
Enet[alpha=0.2]	0.660122	0.701526	0.669914	0.657527	0.606526
Enet[alpha=0.3]	0.660764	0.69706	0.670487	0.658044	0.607077
Enet[alpha=0.4]	0.66009	0.698921	0.67192	0.652354	0.607322
Enet[alpha=0.5]	0.660122	0.695943	0.672493	0.650802	0.608424
Enet[alpha=0.6]	0.659801	0.699293	0.670774	0.646663	0.606465
Enet[alpha=0.7]	0.659496	0.697804	0.67192	0.646663	0.606894
Enet[alpha=0.8]	0.659303	0.696316	0.671347	0.645629	0.607812
Enet[alpha=0.9]	0.659303	0.695199	0.670487	0.644077	0.608914
GBM	0.63681	0.663193	0.619914	0.586136	0.60022
Lasso	0.659528	0.693338	0.670774	0.644594	0.610261
plsRcox	0.649686	0.70227	0.660172	0.647698	0.573772
Ridge	0.659431	0.708969	0.676504	0.666839	0.608608
RSF	0.636409	0.634537	0.618338	0.564925	0.591649
StepCox[backward]	0.660395	0.659844	0.639542	0.549405	0.561344
StepCox[both]	0.660395	0.659844	0.639542	0.549405	0.561344
StepCox[forward]	0.667989	0.601414	0.648138	0.620797	0.586507
SuperPC	0.64381	0.718273	0.677077	0.666839	0.595506
survivalSVM	0.614334	0.668403	0.657307	0.661666	0.576711

## Sheet: S4
gene	lowMean	highMean	logFC	pValue	fdr
SCGB2A1	13.0245	0.752093	-4.11417	7.70083e-05	0.000208548
KEL	4.29564	0.31535	-3.76785	1.81272e-08	1.01904e-07
FCER2	2.46997	0.199027	-3.63346	9.96156e-14	1.46037e-12
MS4A1	9.12716	0.811448	-3.4916	3.12931e-23	3.87712e-21
PCP4	8.72418	0.793373	-3.45895	0.0130337	0.0218537
C8G	16.0661	1.47673	-3.44355	5.12057e-07	2.14547e-06
IL17REL	4.63425	0.505099	-3.1977	1.80865e-09	1.23267e-08
MUC6	1.96966	0.219228	-3.16744	0.0319599	0.0486366
CD8B2	5.47989	0.654124	-3.06651	1.83204e-05	5.64106e-05
KRT36	9.13138	1.10877	-3.04188	1.26456e-05	4.02814e-05
ZFR2	2.46154	0.305104	-3.01219	2.35717e-13	3.19635e-12
CRB2	1.91032	0.240513	-2.98963	4.41281e-07	1.87512e-06
KRT24	100.907	12.8043	-2.97832	2.53895e-15	5.09877e-14
ATP13A5	8.637	1.13607	-2.92648	0.00170944	0.0035126
UPB1	1.19572	0.159924	-2.90242	9.7315e-14	1.42982e-12
ZNF541	4.84405	0.649778	-2.8982	2.06995e-16	5.30309e-15
SPIB	15.842	2.13795	-2.88945	3.29195e-20	2.11873e-18
NEFH	16.1488	2.20949	-2.86964	3.31442e-07	1.44756e-06
CD19	5.43849	0.754663	-2.8493	2.56586e-21	2.10273e-19
NOS2	13.9261	2.05322	-2.76183	5.64769e-08	2.89381e-07
IGLL1	1.07468	0.159703	-2.75045	2.79225e-22	2.77e-20
TNFRSF13B	1.25747	0.187947	-2.74213	3.67243e-25	8.65252e-23
RORB	2.93533	0.459313	-2.67597	3.20904e-08	1.71584e-07
PYDC1	7.16615	1.16576	-2.61993	0.000279904	0.00067937
PLA2G2D	8.00683	1.32112	-2.59947	1.57959e-17	4.99786e-16
MEI1	8.16923	1.35569	-2.59118	1.49777e-22	1.56838e-20
ENPP6	2.21732	0.369157	-2.58651	1.1195e-05	3.60611e-05
GRIN2A	1.17586	0.20224	-2.53958	0.0106826	0.0183046
CR2	3.08386	0.540656	-2.51196	1.07029e-13	1.56211e-12
TCL1A	3.93251	0.704809	-2.48015	1.79518e-12	2.07042e-11
CD79A	74.9407	13.9407	-2.42644	9.96061e-26	2.68205e-23
AC136428.1	7.24432	1.3558	-2.41771	7.76782e-21	5.82322e-19
FMO3	19.9323	3.7852	-2.39667	5.08435e-09	3.16131e-08
CD22	3.84309	0.72983	-2.39664	3.94351e-11	3.64106e-10
CCL19	134.492	26.2194	-2.35881	1.30009e-15	2.75335e-14
BLK	1.74637	0.341681	-2.35363	3.58344e-24	6.30399e-22
CYP2E1	3.05113	0.602735	-2.33975	1.27941e-15	2.71828e-14
FAM3B	19.8227	4.00182	-2.30843	8.32784e-17	2.31809e-15
RHOXF1	1.01519	0.210714	-2.2684	2.06177e-05	6.27955e-05
TAF7L	4.08969	0.849488	-2.26733	0.00554219	0.0101801
VCAM1	47.1332	9.81722	-2.26336	1.63043e-07	7.60944e-07
STAG3	5.72979	1.20505	-2.24939	8.06144e-10	5.83448e-09
ADH1C	26.3735	5.54681	-2.24936	2.98601e-05	8.80194e-05
NKX2-3	5.09306	1.07958	-2.23807	3.37364e-07	1.47098e-06
B3GALT5	2.48716	0.528862	-2.23353	3.31507e-06	1.18889e-05
SYCP2	9.85151	2.0974	-2.23174	1.06766e-07	5.16376e-07
ADGRG7	1.76235	0.382317	-2.20466	0.00639797	0.0115841
DRGX	1.44059	0.313137	-2.20179	9.67045e-05	0.000257242
MGAT3	12.5557	2.73206	-2.20029	5.65556e-11	5.05551e-10
TLR10	2.60074	0.568952	-2.19254	2.2187e-17	6.79199e-16
BTNL9	8.2702	1.82471	-2.18025	2.69548e-05	7.99915e-05
TCP11	3.3367	0.744391	-2.16429	1.94559e-06	7.32363e-06
IL19	1.61821	0.363706	-2.15355	0.000101928	0.000270266
SIM2	5.69445	1.30138	-2.12952	0.00226235	0.0045179
TNFRSF17	8.49356	1.97314	-2.10588	2.4888e-25	6.08097e-23
SMC1B	5.72828	1.34536	-2.09011	0.00402559	0.00760178
HTR3A	4.30514	1.02657	-2.06823	1.72118e-12	1.9973e-11
HS3ST4	2.23769	0.533827	-2.06757	1.79704e-09	1.2266e-08
WDR49	1.04115	0.250631	-2.05454	2.18013e-10	1.76362e-09
TDRD10	2.7927	0.674482	-2.04981	8.51979e-07	3.42714e-06
TMPRSS2	13.5654	3.28391	-2.04644	4.28692e-17	1.25414e-15
FUT6	11.2007	2.73136	-2.0359	2.72797e-23	3.46086e-21
CD79B	6.99123	1.7247	-2.0192	7.7782e-20	4.60205e-18
TMEM178B	5.89517	1.46174	-2.01184	0.000173087	0.000437745
CD40LG	1.93831	0.486008	-1.99575	9.99731e-23	1.10844e-20
ABCA3	18.0722	4.54478	-1.99148	0.000112037	0.000294993
SHISA8	1.25759	0.324921	-1.9525	2.29415e-13	3.12697e-12
TMPRSS11B	16.8845	4.36701	-1.95098	1.25641e-15	2.67805e-14
SLC26A9	8.71632	2.26946	-1.94137	7.3887e-19	3.43262e-17
FCRL5	2.3267	0.612135	-1.92636	1.69522e-21	1.51127e-19
NUGGC	1.46087	0.387415	-1.91488	1.07144e-25	2.8273e-23
JCHAIN	384.84	102.828	-1.90402	5.19297e-25	1.18131e-22
FCRL3	1.54211	0.4144	-1.89581	1.26158e-16	3.39008e-15
POU2AF1	13.8852	3.74127	-1.89194	2.45929e-19	1.29791e-17
PARM1	36.8171	9.92525	-1.8912	9.03311e-10	6.47733e-09
CLDN3	27.7872	7.50896	-1.88774	4.84102e-05	0.000136363
HMX2	1.43971	0.390066	-1.88399	6.44151e-06	2.18538e-05
CYP4X1	24.5005	6.71182	-1.86803	3.99343e-12	4.3581e-11
IGLL5	5.94706	1.64116	-1.85746	2.88899e-23	3.63022e-21
OCA2	3.7292	1.03111	-1.85467	6.88186e-11	6.05328e-10
DMRTA2	7.44429	2.0587	-1.8544	7.02095e-06	2.36192e-05
KCNA3	2.18157	0.619879	-1.81531	1.79673e-19	9.83651e-18
CYP4F12	5.55736	1.5875	-1.80765	2.69265e-11	2.55841e-10
MZB1	55.0839	15.8179	-1.80008	2.78849e-24	5.18187e-22
VPREB3	7.66051	2.20097	-1.7993	1.93996e-07	8.89363e-07
IL36A	48.8566	14.3264	-1.76987	3.94483e-14	6.33959e-13
ZMAT1	1.72105	0.505338	-1.76797	4.72007e-13	6.03455e-12
ADARB2	1.37795	0.405803	-1.76368	3.25451e-06	1.1678e-05
ZNF831	0.922609	0.272868	-1.75751	2.03131e-22	2.09383e-20
DYNAP	5.05996	1.50615	-1.74826	1.81203e-11	1.77227e-10
IKZF3	9.81582	2.92217	-1.74807	5.07695e-24	8.16893e-22
YBX2	5.59031	1.67128	-1.74197	3.45311e-05	0.000100331
C1QTNF4	1.32582	0.396645	-1.74096	5.17649e-06	1.78839e-05
TLX3	3.57202	1.07256	-1.73568	4.87145e-09	3.04905e-08
FCRLA	3.60194	1.09208	-1.72169	5.70551e-11	5.09327e-10
PNOC	1.49068	0.455883	-1.70923	2.0419e-21	1.77243e-19
GPR18	1.85962	0.572585	-1.69944	1.28495e-18	5.57684e-17
ATP13A4	7.58627	2.34731	-1.69238	9.71214e-16	2.13926e-14
CD27	13.6889	4.23649	-1.69206	6.02848e-23	7.12506e-21
CYP4B1	10.7337	3.33215	-1.68763	9.94038e-13	1.19994e-11
KRT78	87.7567	27.3738	-1.68071	3.37724e-17	1.00813e-15
LAX1	5.0007	1.56144	-1.67926	3.0498e-19	1.54765e-17
COL4A4	2.96288	0.932868	-1.66725	1.28445e-06	5.00209e-06
SPRR3	2314.11	730.039	-1.66441	2.17782e-15	4.41385e-14
BEST2	3.17156	1.00264	-1.66139	0.00060734	0.00137237
GPR174	2.09749	0.664258	-1.65885	5.05672e-21	3.94783e-19
KLRB1	5.10591	1.62119	-1.65512	1.27233e-26	4.30438e-24
SOX8	2.78044	0.887946	-1.64677	0.0156083	0.0256523
CEACAM7	16.0754	5.14694	-1.64307	3.27311e-16	8.08716e-15
MSGN1	1.1736	0.376479	-1.6403	0.00380941	0.00724227
BTLA	1.29692	0.416328	-1.6393	6.02583e-18	2.09223e-16
DEFB124	0.95984	0.309114	-1.63466	0.00390423	0.0073986
TJP3	13.6302	4.39745	-1.63207	1.41547e-18	6.08136e-17
CYP27A1	38.3957	12.3987	-1.63076	1.39399e-05	4.40429e-05
SYNGR3	8.4146	2.71832	-1.63018	1.95761e-09	1.32455e-08
HLF	8.97114	2.90261	-1.62794	9.52144e-19	4.36201e-17
BANK1	2.71512	0.879716	-1.62591	1.79138e-10	1.47722e-09
KCNJ18	3.16226	1.02472	-1.62573	7.75701e-08	3.85484e-07
IRAG2	4.58316	1.48808	-1.62289	1.81134e-14	3.10778e-13
CRNN	378.949	123.103	-1.62214	1.64863e-11	1.6245e-10
GPR25	2.15115	0.705283	-1.60883	3.45866e-14	5.64771e-13
STAP1	2.41877	0.794567	-1.60603	1.27914e-17	4.13651e-16
MYO3A	2.94655	0.971142	-1.60127	1.34638e-06	5.21862e-06
RANBP17	0.964454	0.318371	-1.599	0.000116804	0.000306384
TIMD4	0.957665	0.31805	-1.59027	8.09676e-09	4.82296e-08
GPR15	5.66575	1.88349	-1.58886	3.40606e-12	3.76693e-11
IRF4	7.24196	2.41183	-1.58625	1.07106e-18	4.80667e-17
HCAR1	1.21985	0.406264	-1.58621	3.38796e-05	9.86552e-05
SLAMF6	8.89434	2.96682	-1.58397	2.75926e-21	2.24727e-19
SPINK7	76.0777	25.5357	-1.57496	5.47925e-07	2.28199e-06
CHDH	2.82972	0.950398	-1.57405	8.32627e-12	8.64353e-11
HMSD	2.69045	0.908811	-1.5658	5.92316e-11	5.26974e-10
MUC4	18.1936	6.15759	-1.56299	1.96218e-11	1.90781e-10
OR2I1P	23.8409	8.08407	-1.56029	2.8242e-13	3.7601e-12
EXOC3L4	5.70956	1.9471	-1.55205	2.16401e-08	1.19464e-07
LY9	1.50416	0.514401	-1.548	1.26736e-21	1.14531e-19
GZMM	9.547	3.26862	-1.54636	7.01903e-25	1.4937e-22
CALHM1	1.24951	0.427933	-1.54591	3.2571e-05	9.52019e-05
ORM2	1.15306	0.395245	-1.54465	6.36636e-08	3.22696e-07
TNFRSF13C	4.71765	1.62753	-1.53539	4.4256e-19	2.18694e-17
CHST4	1.00605	0.348172	-1.53083	0.000669623	0.00150102
DUOX2	35.2519	12.215	-1.52905	6.65828e-09	4.0261e-08
STAR	4.02809	1.39953	-1.52516	0.000279424	0.000678331
RPTN	33.2635	11.571	-1.52342	2.06872e-05	6.29722e-05
TRAT1	2.42854	0.845306	-1.52254	8.91775e-21	6.61016e-19
CRYM	2.60554	0.907017	-1.52238	4.45875e-05	0.000126269
CNTD1	1.25347	0.437257	-1.51938	0.000602718	0.00136286
HS3ST6	9.90463	3.46217	-1.51642	5.428e-06	1.86795e-05
ZNF683	5.42215	1.89535	-1.5164	3.68456e-17	1.09e-15
ZNF667	1.01274	0.354592	-1.51404	0.00565849	0.0103851
TENT5C	19.9599	7.01144	-1.50932	1.54997e-18	6.49218e-17
ZAP70	7.60244	2.67125	-1.50895	6.93392e-24	1.08912e-21
SPRR2F	277.207	97.5692	-1.50646	2.01711e-08	1.12152e-07
EPHX3	57.9078	20.4702	-1.50023	8.95361e-18	2.99832e-16
IRX6	6.31724	2.23559	-1.49864	3.36784e-07	1.46894e-06
SPOCK2	35.8004	12.6786	-1.49758	1.03089e-18	4.65807e-17
DERL3	6.677	2.36632	-1.49655	9.07681e-17	2.52125e-15
IL2RG	21.1607	7.53675	-1.48937	3.77895e-17	1.11543e-15
C7	3.16834	1.12858	-1.48922	0.00221356	0.00443586
KL	1.20877	0.431038	-1.48765	2.15968e-06	8.06763e-06
NPPC	10.0481	3.60901	-1.47724	6.17842e-08	3.13652e-07
C11orf16	1.36721	0.491386	-1.4763	0.00325044	0.00628642
NCR3	2.07675	0.747306	-1.47456	2.06305e-18	8.22351e-17
UBASH3A	2.69118	0.970135	-1.47198	1.83057e-21	1.62098e-19
SULT1B1	1.67697	0.607024	-1.46603	2.60445e-07	1.16723e-06
MAL	181.95	65.9589	-1.4639	2.94167e-14	4.88206e-13
SH2D1A	4.50491	1.63416	-1.46295	4.12875e-20	2.56956e-18
C4orf19	3.33635	1.21304	-1.45964	8.8043e-09	5.21856e-08
CAPN14	12.9091	4.7122	-1.45392	1.56212e-08	8.87243e-08
CLDN10	8.30603	3.03532	-1.45231	0.000172252	0.00043605
MFSD4A	6.73635	2.46894	-1.44807	4.72394e-07	1.99576e-06
PCP4L1	28.2793	10.4262	-1.43954	5.76212e-14	8.90228e-13
ALKAL2	1.51411	0.558563	-1.43868	9.112e-06	2.98544e-05
KRT13	2930.68	1082.17	-1.4373	1.32745e-14	2.33837e-13
CXCR3	11.4747	4.23979	-1.43639	5.2705e-20	3.16086e-18
IL17RB	5.89458	2.1812	-1.43427	3.67154e-10	2.83786e-09
ANKRD34B	0.962819	0.356755	-1.43233	3.86016e-06	1.37022e-05
MAP7D2	8.20635	3.04329	-1.43111	0.0155656	0.0255884
SERPINB12	11.784	4.37709	-1.42878	8.42538e-07	3.39226e-06
TBC1D10C	8.33527	3.11006	-1.42228	3.60817e-22	3.48613e-20
LORICRIN	20.7591	7.74873	-1.42171	8.29349e-05	0.000223406
GZMK	3.55496	1.32988	-1.41854	9.45293e-18	3.14954e-16
CD5	12.75	4.76968	-1.41853	2.53423e-21	2.10273e-19
P2RY10	5.34678	2.0023	-1.41702	2.11244e-18	8.36982e-17
CALML5	1041.39	390.287	-1.4159	7.97815e-19	3.69346e-17
ZYG11A	2.70349	1.01472	-1.41374	6.72503e-08	3.38277e-07
SERPINI1	21.0599	7.9444	-1.40649	0.00119694	0.00254634
CRTAM	2.57252	0.973742	-1.40157	7.13023e-16	1.61921e-14
LTA	2.82564	1.07202	-1.39824	7.96205e-16	1.78355e-14
DUOXA2	12.0055	4.5582	-1.39715	8.3677e-10	6.03957e-09
TMPRSS11A	62.1002	23.6082	-1.39531	1.0782e-15	2.35137e-14
SYCE2	1.93222	0.734769	-1.3949	0.000110835	0.000292121
RNF165	3.39494	1.2913	-1.39456	0.000164432	0.000417535
SELL	23.6702	9.01393	-1.39284	4.55169e-13	5.84193e-12
CD6	9.03459	3.44336	-1.39164	6.5002e-23	7.52313e-21
MUC21	33.03	12.6079	-1.38945	1.16624e-15	2.51018e-14
FOXD3	1.41416	0.543379	-1.37991	1.93345e-05	5.9229e-05
ACBD7	3.71299	1.42718	-1.37941	0.00520217	0.00961308
FCRL6	1.09994	0.423829	-1.37586	3.45264e-15	6.76882e-14
MYB	5.82731	2.24639	-1.37522	1.62683e-11	1.60541e-10
FAM240C	2.7618	1.07325	-1.36362	2.05698e-05	6.26787e-05
CCR7	15.0589	5.85305	-1.36336	9.41004e-19	4.32599e-17
PLAC8	24.3056	9.51454	-1.35308	7.27689e-14	1.09853e-12
CD177	45.6906	17.9015	-1.35182	1.76161e-09	1.20366e-08
FOXA1	19.5161	7.65299	-1.35057	7.799e-08	3.87279e-07
CD3G	6.27276	2.46137	-1.34964	2.40829e-19	1.28644e-17
P2RY8	6.40253	2.52043	-1.34497	5.65373e-16	1.3064e-14
MYCN	3.57223	1.40908	-1.34207	3.86772e-07	1.66441e-06
CD8A	24.5907	9.70445	-1.34139	2.80953e-18	1.06827e-16
ITLN1	1.28477	0.50728	-1.34065	0.000467162	0.00107946
GABRP	39.9614	15.7875	-1.33983	1.37342e-07	6.50895e-07
C19orf57	7.74091	3.06129	-1.33836	6.76354e-09	4.08601e-08
ESR1	2.05142	0.812095	-1.3369	0.00921102	0.0160119
TGM6	1.1538	0.45735	-1.33502	0.000221168	0.000548411
MAP4K1	7.82085	3.10727	-1.33168	1.18137e-22	1.26723e-20
SFTA2	2.42053	0.961732	-1.33162	7.85127e-08	3.89581e-07
COL6A6	0.898436	0.357028	-1.33138	2.05257e-11	1.98837e-10
CCDC60	0.95933	0.381477	-1.33043	2.67479e-07	1.19469e-06
BCL2	6.07861	2.41951	-1.32903	1.72525e-14	2.97554e-13
PDE6B	2.53432	1.00888	-1.32885	1.21247e-09	8.51827e-09
PRSS27	26.8229	10.678	-1.32882	1.76279e-18	7.26822e-17
TIFAB	0.926525	0.369683	-1.32554	1.51389e-18	6.36212e-17
SLAMF1	3.69672	1.47767	-1.32293	5.20662e-20	3.13681e-18
KCNS1	5.07099	2.03843	-1.31481	0.000610044	0.00137783
KRT4	809.161	325.513	-1.31371	1.0699e-06	4.22389e-06
GZMH	24.2469	9.76849	-1.31159	2.25468e-19	1.21422e-17
CD48	6.24217	2.51735	-1.31014	4.08782e-17	1.19855e-15
SEPTIN1	6.64837	2.68294	-1.30918	2.35506e-24	4.50328e-22
KLK12	54.0211	21.8142	-1.30826	8.47791e-06	2.79994e-05
TMEM156	2.85347	1.15797	-1.30112	2.20584e-11	2.12748e-10
HAL	4.90994	1.99251	-1.30112	4.11186e-06	1.45097e-05
FAM83E	24.3164	9.87645	-1.29986	2.09033e-10	1.69305e-09
PPP1R16B	9.30113	3.77786	-1.29984	4.836e-17	1.40853e-15
VNN1	7.70647	3.13131	-1.2993	6.38781e-10	4.70842e-09
ITK	3.08365	1.25296	-1.2993	3.7649e-16	9.16495e-15
PARP15	1.65018	0.67065	-1.29899	4.01822e-14	6.44969e-13
RSPO1	0.879772	0.357635	-1.29864	1.84704e-14	3.1608e-13
LTB	35.1771	14.3143	-1.29718	1.09314e-11	1.1069e-10
SIRPG	7.91322	3.22423	-1.29531	9.64487e-18	3.19735e-16
MROH2A	3.05558	1.24916	-1.29049	0.00443066	0.00830254
SNX22	1.16243	0.475338	-1.29012	8.60111e-13	1.05077e-11
ARHGAP4	26.8318	10.9727	-1.29002	1.30864e-19	7.37871e-18
GAPT	1.46946	0.601214	-1.28933	2.53576e-13	3.42094e-12
CD3E	36.0323	14.7537	-1.28821	1.58686e-19	8.76026e-18
FAM189A2	2.00723	0.823328	-1.28566	0.00019195	0.000481663
IL21R	4.93859	2.02826	-1.28385	3.34494e-12	3.70867e-11
IKZF1	6.34303	2.60688	-1.28285	4.10686e-16	9.86993e-15
CDKN2C	42.7927	17.5939	-1.28229	8.66454e-07	3.48006e-06
SIT1	10.6689	4.39138	-1.28066	6.35296e-21	4.84515e-19
SCNN1B	22.3051	9.19187	-1.27894	1.79917e-15	3.7091e-14
ICAM3	2.41264	0.994941	-1.27793	7.82581e-18	2.66805e-16
CSF2RB	24.1083	9.9635	-1.27481	3.86999e-15	7.55335e-14
FAM3D	19.1146	7.90144	-1.27448	7.14848e-16	1.62057e-14
ACER1	5.10103	2.10884	-1.27434	0.000118102	0.000309482
ITGAL	8.95353	3.70586	-1.27265	2.40829e-18	9.31816e-17
GRAP2	2.50132	1.03565	-1.27215	1.41132e-18	6.08136e-17
CD3D	53.4248	22.1374	-1.27102	8.93137e-22	8.24059e-20
EYA2	28.2472	11.7065	-1.27079	1.96047e-08	1.09233e-07
TMEM71	2.57165	1.07052	-1.26438	1.35292e-13	1.92769e-12
CCR4	4.97537	2.07523	-1.26153	3.25346e-15	6.40689e-14
TRPV6	0.855988	0.357737	-1.25869	5.7288e-11	5.1106e-10
PDCD1	7.98549	3.3421	-1.25663	3.52278e-18	1.30195e-16
FUT3	39.0637	16.3563	-1.25598	4.91178e-16	1.15109e-14
ADGRG5	2.86978	1.20166	-1.25591	1.56875e-16	4.13963e-15
THEMIS	2.03447	0.85379	-1.2527	7.12483e-17	2.00865e-15
FDCSP	1753.66	737.29	-1.25006	2.95232e-07	1.30583e-06
CD8B	2.65282	1.11807	-1.24652	1.42789e-18	6.09697e-17
CD52	64.4015	27.1875	-1.24415	4.26389e-18	1.54131e-16
WDFY4	3.41158	1.44067	-1.24369	8.31729e-13	1.02177e-11
FUT7	3.32721	1.40678	-1.24191	2.89022e-19	1.47234e-17
PYHIN1	2.41466	1.0219	-1.24056	2.45364e-16	6.18992e-15
LTF	201.562	85.3824	-1.23921	1.26218e-08	7.28171e-08
NR3C2	1.96465	0.833435	-1.23713	1.9493e-08	1.08703e-07
GPAT2	1.95324	0.829517	-1.23553	0.00362926	0.00693576
CXCL17	157.607	66.982	-1.23449	1.47915e-17	4.71398e-16
SMIM5	3.90844	1.66342	-1.23244	6.47295e-21	4.90828e-19
RAD9B	0.943197	0.403123	-1.22634	1.0681e-06	4.21932e-06
SPINK5	194.636	83.4303	-1.22213	5.52541e-15	1.05655e-13
TCIM	65.8655	28.2762	-1.21993	0.000814481	0.00179254
CIBAR2	1.0128	0.434862	-1.21972	9.60548e-14	1.41445e-12
GPR171	4.33602	1.86296	-1.21877	2.94646e-16	7.33501e-15
SLC1A1	6.14994	2.64557	-1.21699	3.04423e-06	1.09892e-05
SNX31	3.98531	1.71442	-1.21697	1.93618e-05	5.92886e-05
AMY2B	0.938541	0.404509	-1.21425	1.66071e-09	1.14005e-08
CLEC10A	8.34791	3.59821	-1.21414	8.90989e-14	1.32087e-12
HPGD	10.2776	4.43332	-1.21304	1.06311e-09	7.53716e-09
CD96	6.51917	2.81464	-1.21174	6.84235e-19	3.19003e-17
CD2	47.0437	20.3393	-1.20973	5.15847e-18	1.81495e-16
FLT3	1.02434	0.44296	-1.20944	1.57301e-16	4.14257e-15
EOMES	3.01539	1.30523	-1.20804	7.7718e-15	1.44221e-13
LILRA4	1.46768	0.635717	-1.20708	4.61691e-12	4.99308e-11
TMEM211	0.845769	0.366995	-1.2045	7.37645e-05	0.000200216
XCR1	2.11321	0.917594	-1.20351	6.50665e-19	3.06603e-17
GPR55	0.882224	0.383835	-1.20066	2.31877e-18	9.07829e-17
TESPA1	2.31975	1.01022	-1.1993	5.18498e-16	1.20867e-14
REM1	2.72956	1.19003	-1.19766	9.83413e-06	3.20532e-05
TMEM150C	10.4353	4.56563	-1.19259	2.17497e-05	6.58631e-05
TAC3	1.15675	0.506618	-1.19111	0.00568637	0.0104231
RAB37	1.82371	0.80185	-1.18547	2.79675e-19	1.43581e-17
NLRC3	3.51704	1.54679	-1.18508	3.08646e-19	1.56026e-17
DOC2B	34.7251	15.284	-1.18396	1.30927e-12	1.56189e-11
FASLG	3.70014	1.63331	-1.17978	1.13893e-16	3.08564e-15
SPACA4	1.53693	0.679878	-1.17671	2.66848e-16	6.70627e-15
PLA2G4D	8.9523	3.96245	-1.17586	0.00244221	0.00484404
RASGRP2	2.84296	1.2599	-1.17408	4.43541e-11	4.04149e-10
MAB21L4	39.3606	17.458	-1.17287	3.8268e-16	9.28143e-15
ANXA9	21.4131	9.49885	-1.17267	4.73168e-13	6.04354e-12
S1PR4	12.808	5.69207	-1.17002	3.65183e-24	6.33977e-22
GAL3ST2	1.07847	0.479415	-1.16964	0.0008691	0.00190227
RNF150	3.96208	1.76327	-1.168	0.000452023	0.00104871
LGALS4	3.12686	1.39231	-1.16723	0.000638663	0.00143623
CXCR6	8.75707	3.90333	-1.16574	8.50397e-18	2.855e-16
SPNS3	1.01356	0.451887	-1.1654	2.21605e-26	7.13137e-24
PTGDS	0.94563	0.421657	-1.16521	1.64383e-12	1.91471e-11
KLRG1	1.15041	0.513003	-1.16511	1.30703e-15	2.75482e-14
SCNN1G	9.36749	4.19025	-1.16063	4.73671e-10	3.5753e-09
NCF1	4.55323	2.03758	-1.16003	4.32088e-24	7.21641e-22
CD37	16.0636	7.18945	-1.15985	1.21119e-11	1.22175e-10
LDLRAD1	1.03924	0.465134	-1.15982	1.65629e-07	7.71875e-07
NKG7	57.964	26.0119	-1.15599	2.74204e-17	8.25993e-16
BCAS1	4.10301	1.84441	-1.15353	8.14053e-05	0.0002196
CD247	8.56414	3.86339	-1.14844	2.18138e-17	6.6933e-16
LGALS2	15.0854	6.82329	-1.14461	1.50947e-15	3.1532e-14
TAGAP	7.58846	3.43306	-1.14431	4.43111e-16	1.05722e-14
SP9	1.57955	0.715341	-1.14281	0.00786866	0.0139355
CIITA	6.90327	3.13454	-1.13902	6.19751e-16	1.42456e-14
SLURP1	294.784	133.896	-1.13855	0.00151813	0.00315888
TMIGD2	2.25437	1.02446	-1.13786	1.30855e-11	1.306e-10
SERPINB11	6.52636	2.9692	-1.13621	4.50511e-07	1.91065e-06
SLC2A4	2.28065	1.03783	-1.13587	0.000772962	0.00170743
KRT15	603.031	274.632	-1.13473	0.000263474	0.000643277
CHRNA6	0.803314	0.365881	-1.13459	0.000309507	0.000743425
SYNE4	3.33279	1.51847	-1.13411	1.66909e-06	6.36289e-06
KRT33B	0.986713	0.449742	-1.13353	0.000956102	0.00207583
CLCA4	45.1335	20.5747	-1.13333	1.31453e-11	1.30997e-10
PIM2	58.0843	26.5168	-1.13124	2.34602e-18	9.15781e-17
CD28	3.33212	1.52126	-1.13118	1.82454e-12	2.09879e-11
YPEL1	1.24271	0.567501	-1.13079	4.05618e-09	2.58912e-08
RND1	4.06994	1.85936	-1.1302	2.28512e-16	5.82044e-15
CARMIL2	2.27972	1.04157	-1.1301	7.24765e-17	2.03892e-15
TMSB15A	11.5373	5.27321	-1.12956	0.00645839	0.0116825
TEX101	2.09179	0.95638	-1.12908	7.56924e-09	4.53536e-08
LCE3A	119.344	54.5862	-1.12852	0.0125851	0.0211958
ATP10B	7.18116	3.28654	-1.12765	3.74987e-10	2.89332e-09
CTSW	17.6821	8.10215	-1.12591	2.71326e-18	1.03465e-16
RHBDL3	2.42837	1.11345	-1.12495	0.0017262	0.00354594
GNG8	6.66855	3.0579	-1.12483	5.70885e-06	1.95745e-05
RAB42	8.50548	3.90318	-1.12374	0.00336364	0.00647881
GDPD3	14.6867	6.73977	-1.12374	1.56681e-15	3.26065e-14
GGT6	41.0919	18.9208	-1.11888	1.92857e-20	1.33924e-18
LYPD2	106.955	49.3306	-1.11644	5.94402e-08	3.02684e-07
CLECL1	1.18158	0.545057	-1.11623	1.36598e-12	1.61784e-11
CCR2	2.7061	1.24915	-1.11526	1.06925e-12	1.2872e-11
SASH3	23.8935	11.0327	-1.11483	7.67154e-15	1.42561e-13
RASAL3	10.1896	4.71039	-1.11318	4.37617e-18	1.57757e-16
CCNI2	1.42766	0.660209	-1.11266	0.0238581	0.0374388
PENK	2.45054	1.13378	-1.11196	7.44213e-05	0.000201957
PTX4	2.02291	0.937054	-1.11023	1.24532e-07	5.95102e-07
MIOX	1.89683	0.879174	-1.10937	1.06161e-05	3.4356e-05
PRKCB	3.45344	1.60127	-1.10882	7.79288e-11	6.81826e-10
VNN2	3.68018	1.71055	-1.10532	2.26945e-17	6.93128e-16
SIGLEC8	1.27828	0.59455	-1.10434	2.63383e-08	1.43302e-07
DNASE1L3	11.915	5.55834	-1.10005	3.1554e-18	1.17939e-16
MUC20	9.41529	4.39227	-1.10004	5.46202e-10	4.07152e-09
FAM81A	1.94588	0.908958	-1.09814	0.00131221	0.00276527
IFNG	3.1009	1.44968	-1.09696	6.4142e-14	9.79502e-13
TIGIT	6.71427	3.14654	-1.09346	1.64368e-15	3.40451e-14
GP1BA	1.53367	0.720094	-1.09074	0.00041703	0.000972481
SMIM22	4.32262	2.03101	-1.08971	2.72076e-06	9.95225e-06
SPN	7.63507	3.58778	-1.08955	6.14921e-15	1.16236e-13
BCL2L14	1.64471	0.773605	-1.08816	4.64643e-11	4.2163e-10
IPCEF1	1.316	0.619763	-1.08637	2.43384e-15	4.89521e-14
CORO1A	52.2447	24.634	-1.08463	1.19138e-17	3.88126e-16
WNK2	11.5278	5.43809	-1.08394	1.47776e-05	4.63895e-05
CEACAM21	2.88082	1.35926	-1.08366	5.98375e-16	1.37783e-14
TBX21	2.2866	1.07939	-1.08298	1.89641e-16	4.93515e-15
FATE1	0.879879	0.416085	-1.08043	0.00367681	0.00701545
CXCR4	95.309	45.1262	-1.07865	4.99474e-09	3.10999e-08
ZC3H12D	1.69713	0.804789	-1.07642	5.27689e-14	8.22978e-13
PRSS36	3.99737	1.89805	-1.07454	4.10685e-16	9.86993e-15
PITX1	237.365	113.032	-1.07038	9.48865e-17	2.60277e-15
ASRGL1	2.02763	0.966256	-1.06931	9.35176e-06	3.05717e-05
TF	1.58163	0.753822	-1.06911	2.73886e-05	8.12057e-05
C3orf70	3.29944	1.57452	-1.06731	6.28431e-07	2.57902e-06
ARHGAP26	7.06438	3.37186	-1.06702	1.83344e-07	8.46412e-07
TFF3	56.304	26.8939	-1.06596	0.000137878	0.000355653
LDHC	1.32973	0.635336	-1.06554	0.00141662	0.00296869
CCER2	0.77167	0.368827	-1.06504	0.000566132	0.00128564
RUFY4	1.44048	0.688637	-1.06474	4.82688e-08	2.50043e-07
VWCE	1.23313	0.590095	-1.0633	0.00188124	0.00383516
RHCG	702.708	336.446	-1.06255	1.16172e-08	6.74637e-08
CPNE5	5.00262	2.40121	-1.05892	1.55293e-14	2.70307e-13
WFIKKN1	0.776143	0.372893	-1.05756	0.00027238	0.000663304
TMSB4Y	1.52301	0.732369	-1.05628	0.00100182	0.00216617
SLC7A2	11.4835	5.52247	-1.05618	8.33239e-05	0.000224317
CCR5	11.4207	5.50138	-1.05379	1.2543e-14	2.23036e-13
SOWAHA	0.817704	0.39393	-1.05364	0.000324976	0.0007762
IL34	13.6413	6.57266	-1.05344	4.57766e-16	1.08824e-14
SLA2	6.69862	3.2331	-1.05095	1.2673e-14	2.24741e-13
C11orf21	0.897063	0.433134	-1.0504	3.55215e-17	1.05557e-15
CES3	2.77271	1.34193	-1.04699	8.33238e-05	0.000224317
PTPRC	21.8084	10.5553	-1.04692	1.02313e-11	1.0408e-10
TSPOAP1	2.61086	1.26374	-1.04682	2.97091e-09	1.94147e-08
ITGB7	4.20472	2.03966	-1.04368	6.11479e-19	2.91261e-17
INSM1	3.80976	1.85145	-1.04105	1.01373e-08	5.94982e-08
CYTIP	15.8424	7.69946	-1.04096	6.54991e-14	9.97916e-13
C16orf89	1.04252	0.507575	-1.03838	0.00509365	0.0094284
ARMH1	1.08083	0.528044	-1.0334	5.3627e-09	3.30946e-08
SCIMP	2.25455	1.10154	-1.03331	4.67903e-09	2.93977e-08
LCK	18.0509	8.82074	-1.0331	5.5926e-17	1.61111e-15
RASGRP1	7.70377	3.76452	-1.0331	2.08741e-15	4.25678e-14
NCCRP1	219.097	107.1	-1.03261	2.32158e-13	3.16108e-12
C2CD4B	3.31033	1.62272	-1.02856	0.000309732	0.000743831
OXER1	3.0687	1.50976	-1.02331	8.67908e-07	3.48484e-06
TMC8	19.7414	9.71441	-1.02303	1.78078e-11	1.7443e-10
TNFSF8	2.0844	1.02658	-1.02179	4.04973e-11	3.72349e-10
ACSM3	0.769813	0.379781	-1.01934	4.17318e-07	1.78306e-06
RHOH	4.3198	2.1329	-1.01815	2.23977e-14	3.80818e-13
BCO1	1.62848	0.804114	-1.01806	3.65881e-08	1.92943e-07
CXCL13	90.7011	44.8598	-1.0157	7.59109e-10	5.52133e-09
SUSD4	34.2765	16.9545	-1.01555	5.65526e-12	6.03197e-11
FOXJ1	6.119	3.0273	-1.01526	4.85241e-06	1.68836e-05
SIDT1	2.60022	1.28743	-1.01414	3.49827e-16	8.57922e-15
M1AP	3.94968	1.9565	-1.01346	1.82025e-07	8.40613e-07
IRF8	13.4091	6.64324	-1.01325	2.28662e-11	2.20056e-10
BATF	30.0692	14.9083	-1.01217	5.3675e-19	2.5941e-17
KLHDC7B	40.4857	20.0966	-1.01046	1.74457e-06	6.63147e-06
SP5	2.26988	1.12827	-1.0085	0.0027589	0.00541922
SVIP	6.66424	3.31274	-1.00842	5.43149e-13	6.89068e-12
CYSRT1	100.56	50.0036	-1.00795	3.05415e-10	2.39717e-09
PLIN5	0.924031	0.460063	-1.00611	9.79971e-11	8.46741e-10
CNFN	1553.39	773.743	-1.00549	6.1242e-08	3.11139e-07
AJM1	4.18342	2.08408	-1.00527	1.14453e-05	3.67687e-05
CEACAM5	129.189	64.371	-1.005	8.4972e-14	1.2668e-12
ST6GALNAC1	20.1504	10.0428	-1.00465	3.64028e-07	1.57578e-06
TSGA10IP	0.852756	0.42552	-1.00291	0.000506134	0.00116077
GRP	3.33653	6.6767	1.00079	3.40689e-09	2.20562e-08
HPCAL4	0.33181	0.664357	1.0016	4.23564e-05	0.00012061
MLLT11	9.14316	18.3178	1.00248	2.42087e-12	2.74643e-11
FER1L6	0.79646	1.59595	1.00274	5.02028e-06	1.74044e-05
SLC22A3	7.90852	15.8557	1.00352	1.37635e-08	7.89892e-08
SCARF2	5.36074	10.7493	1.00373	4.76482e-08	2.47216e-07
SH2D5	7.41184	14.8641	1.00393	1.06102e-15	2.31774e-14
DCBLD2	14.0445	28.1861	1.00498	4.8326e-16	1.1386e-14
COL5A3	28.548	57.2959	1.00504	1.58924e-14	2.75901e-13
MAD1L1	0.453796	0.911088	1.00555	8.17753e-08	4.04102e-07
KIAA1549L	2.95479	5.93266	1.00562	5.16254e-15	9.92924e-14
PALM3	0.491766	0.988398	1.00712	0.0288098	0.0443336
YAP1	53.7387	108.061	1.00781	4.38716e-07	1.86543e-06
PPP4R4	2.60423	5.24637	1.01046	9.12733e-17	2.52996e-15
DCUN1D5	7.4753	15.0608	1.0106	1.18184e-21	1.07539e-19
LIF	5.96181	12.0385	1.01383	1.96218e-06	7.37368e-06
SLC5A12	0.502001	1.01431	1.01474	3.25532e-05	9.51711e-05
MN1	10.4991	21.2331	1.01605	3.6263e-18	1.33646e-16
SPON2	29.2011	59.0699	1.0164	1.90688e-16	4.95263e-15
SLC6A11	5.80001	11.7348	1.01666	8.28821e-12	8.61749e-11
CHPF	105.649	213.987	1.01824	1.10472e-31	1.45757e-28
PDZK1	0.669213	1.3563	1.01914	1.54274e-07	7.23086e-07
P3H2	48.2433	97.7843	1.01927	1.03476e-10	8.9116e-10
RFX8	0.39203	0.794968	1.01993	2.97177e-11	2.80068e-10
EGFR	83.8024	170.061	1.02099	6.51714e-14	9.9407e-13
INHBE	0.327503	0.664694	1.02118	0.00394111	0.00746041
APLN	8.01995	16.293	1.02259	7.1079e-17	2.00817e-15
BIRC2	34.3628	69.824	1.02287	2.50964e-09	1.66644e-08
ABCA4	1.12417	2.28544	1.02361	0.00111799	0.00239267
EN1	5.63118	11.4547	1.02443	3.1863e-10	2.49348e-09
ANTXR2	8.09243	16.463	1.02458	8.5196e-12	8.8232e-11
DIRAS3	1.67579	3.40983	1.02486	0.00303701	0.00591355
SCT	3.18887	6.5045	1.02839	8.95491e-07	3.58584e-06
SULF2	89.1684	182.223	1.0311	3.66189e-21	2.91054e-19
ZNF365	2.12008	4.33294	1.03123	6.36933e-13	7.95052e-12
UBXN10	0.712821	1.45705	1.03144	3.6395e-06	1.29607e-05
NKX6-1	0.497638	1.02093	1.03671	6.31832e-09	3.84697e-08
RAB6B	4.62163	9.49881	1.03934	0.00122485	0.00259734
CORO2B	0.901187	1.85452	1.04115	2.94126e-09	1.92401e-08
P4HA3	2.53417	5.21565	1.04133	3.68456e-13	4.82283e-12
FEZ1	8.70696	17.9335	1.04242	1.92777e-15	3.94341e-14
PCDHGB6	0.525713	1.08463	1.04486	0.00786674	0.0139339
PRR20G	2.21399	4.56884	1.04518	8.81464e-12	9.07179e-11
TIMP4	0.832098	1.71802	1.04592	9.45994e-13	1.14825e-11
ST6GAL2	1.08778	2.24707	1.04666	0.00176327	0.00361475
HRCT1	1.45003	2.99555	1.04674	9.19603e-06	3.0115e-05
MMP16	0.746881	1.54699	1.05051	1.63894e-14	2.8341e-13
KDELR3	22.9197	47.5183	1.0519	1.96456e-20	1.35709e-18
MRGPRX3	3.02542	6.27622	1.05276	0.000147909	0.000379081
C1GALT1C1L	0.728288	1.51191	1.05379	0.000711057	0.0015818
PSORS1C1	0.963585	2.00076	1.05406	7.2269e-16	1.63553e-14
PLPP4	2.74607	5.70434	1.05469	8.06522e-09	4.80635e-08
SLC16A2	10.5894	22.0011	1.05496	1.2673e-14	2.24741e-13
MT2A	1116.05	2320.06	1.05577	2.7e-16	6.77259e-15
CREB5	2.05578	4.27385	1.05585	1.28971e-15	2.73577e-14
CTSV	43.3814	90.3115	1.05783	4.45201e-19	2.19179e-17
NCAM1	1.93129	4.02191	1.05832	9.81659e-09	5.77442e-08
CNGB1	5.39314	11.2402	1.05947	2.52256e-08	1.37703e-07
ZBED2	22.4937	47.0217	1.06381	1.02746e-15	2.25189e-14
ANKRD1	17.0143	35.5835	1.06446	6.84754e-12	7.23351e-11
DNAH5	0.673619	1.41218	1.06792	1.30304e-12	1.55587e-11
PDPN	81.8814	172.235	1.07277	3.83667e-20	2.42206e-18
PSG4	0.975585	2.05752	1.07657	0.0157481	0.0258561
ACTN1	97.5251	206.253	1.08057	1.68964e-28	8.76521e-26
FOXL2	2.10393	4.45114	1.08109	4.48464e-11	4.08353e-10
SLC7A8	77.0786	163.466	1.08458	3.52699e-16	8.63359e-15
C5orf46	2.11103	4.47957	1.08541	2.70126e-11	2.56406e-10
ACTG2	4.95289	10.5151	1.08611	0.00290966	0.00568741
GLI2	3.75915	7.98326	1.08657	1.26126e-06	4.91903e-06
NECAB2	0.633126	1.34604	1.08816	4.0102e-06	1.41699e-05
CFAP300	1.32358	2.81888	1.09068	0.000256807	0.000628514
SLC6A15	4.64443	9.90454	1.09259	4.34816e-09	2.75023e-08
SCN9A	1.17121	2.50012	1.094	1.41083e-07	6.66719e-07
COL10A1	20.2417	43.3019	1.0971	4.31844e-10	3.284e-09
COL4A6	9.72557	20.8302	1.09882	2.14971e-18	8.46665e-17
SLC35G1	2.65212	5.68508	1.10003	2.99588e-06	1.08295e-05
WNT11	4.06313	8.7155	1.10099	3.33445e-06	1.19518e-05
KIF1A	0.431827	0.926842	1.10187	0.00346927	0.00666573
ITGA3	115.643	248.52	1.10368	2.24965e-20	1.53e-18
PPEF1	0.657272	1.4135	1.1047	1.75708e-10	1.45348e-09
DNER	2.16279	4.65972	1.10735	4.30466e-13	5.56821e-12
LOXL2	27.0742	58.3559	1.10796	2.21731e-16	5.66961e-15
SNAI2	50.4942	108.868	1.10839	2.63593e-34	8.69463e-31
NKAIN4	0.440181	0.949071	1.10842	2.84284e-05	8.41374e-05
SGCE	0.905731	1.95504	1.11004	6.32158e-10	4.66482e-09
SLC13A5	1.47424	3.18599	1.11177	0.000323346	0.000772736
TBX5	0.306457	0.66386	1.11519	0.0145579	0.0241454
TENM3	4.83719	10.4928	1.11715	3.49303e-15	6.83784e-14
SERPINA5	0.418088	0.907683	1.11838	0.000261978	0.000639863
ARL14	4.6736	10.1523	1.1192	4.15677e-06	1.46516e-05
EFNB2	15.664	34.0671	1.12092	3.19288e-36	4.21268e-32
BARX1	9.1293	19.8688	1.12193	1.38824e-06	5.3698e-06
GLI1	2.23871	4.87417	1.12249	2.72903e-10	2.16517e-09
NEFL	28.3179	61.685	1.12321	6.37667e-12	6.76861e-11
LMX1B	1.2226	2.66816	1.12589	9.35109e-13	1.13713e-11
DNAH14	0.303843	0.663402	1.12656	1.7819e-12	2.0569e-11
CHRNA9	0.994823	2.17305	1.12721	3.32324e-08	1.76731e-07
PCDHGB1	0.616013	1.34719	1.12892	1.64432e-08	9.28332e-08
CST4	0.834898	1.8265	1.12941	0.000366115	0.000865995
NAP1L2	2.5931	5.68188	1.13169	1.54744e-10	1.28895e-09
GRIA3	0.570848	1.2511	1.13202	5.75132e-05	0.000159686
ADRA2C	3.24288	7.12935	1.1365	3.18871e-06	1.14606e-05
ALX4	0.39487	0.8688	1.13765	2.82898e-07	1.25675e-06
DIO3	1.17837	2.59309	1.13788	7.09766e-07	2.88854e-06
TMEM92	3.13337	6.89598	1.13804	2.31281e-20	1.5569e-18
DCBLD1	13.7155	30.2465	1.14096	1.37539e-28	7.88995e-26
LRRC17	4.24935	9.38136	1.14255	3.81096e-06	1.35348e-05
ITGA6	256.001	566.079	1.14485	6.42006e-24	1.02056e-21
LHB	0.988283	2.18916	1.14738	1.2496e-10	1.06369e-09
GSDME	9.51448	21.1042	1.14933	1.72037e-27	7.3221e-25
BASP1	77.817	172.698	1.15009	6.23511e-21	4.81088e-19
FOXC2	3.03403	6.75115	1.1539	1.71945e-17	5.41442e-16
SCN4B	3.34216	7.43987	1.1545	7.37299e-06	2.46776e-05
NRG1	5.05467	11.2651	1.15618	3.80284e-12	4.16733e-11
DACT1	3.21754	7.18707	1.15945	5.39224e-13	6.86067e-12
COL17A1	401.962	899.235	1.16164	5.9679e-13	7.49909e-12
IL1A	41.2498	92.3003	1.16195	5.13484e-09	3.1852e-08
IGF2BP1	2.27747	5.09612	1.16197	2.86886e-06	1.04193e-05
FST	79.8163	179.089	1.16592	1.8044e-17	5.64152e-16
BCAR3	8.58873	19.3072	1.16862	2.37251e-19	1.27248e-17
MPPED1	0.748316	1.68297	1.16929	0.0139378	0.0231898
CHGA	0.570607	1.28404	1.17012	8.06689e-06	2.67962e-05
CSDC2	0.917341	2.06823	1.17287	1.29698e-05	4.12085e-05
FAM133A	0.673706	1.52245	1.1762	0.00878239	0.0153619
TMEM59L	0.575343	1.30273	1.17904	1.19597e-06	4.68654e-06
TENM2	30.1066	68.1787	1.17924	3.9558e-20	2.47359e-18
GDPD2	8.11518	18.4004	1.18104	1.93915e-05	5.93623e-05
IL6	8.72559	19.8004	1.18221	1.17246e-06	4.60538e-06
FAP	6.35467	14.4509	1.18527	6.11354e-18	2.11711e-16
HECW1	0.302608	0.689702	1.18852	2.30171e-17	7.01358e-16
DKK3	20.6796	47.1357	1.18861	2.66469e-25	6.39234e-23
SHISAL1	4.35531	9.9361	1.1899	3.8143e-11	3.53164e-10
NPR2	3.01066	6.88995	1.19442	1.48874e-10	1.24635e-09
PEG10	5.29091	12.1121	1.19486	0.000239901	0.000590753
IBSP	2.30749	5.28418	1.19535	4.02181e-11	3.7004e-10
MYOG	7.74911	17.7502	1.19574	1.55559e-08	8.83912e-08
B4GALNT1	2.53138	5.8078	1.19807	5.86652e-19	2.81465e-17
FOXL1	1.51967	3.48904	1.19907	1.52158e-15	3.17152e-14
TNFRSF12A	107.335	246.553	1.19977	2.08446e-34	8.69463e-31
TRPC1	1.12094	2.59312	1.20998	2.45868e-10	1.97083e-09
MSC	16.3168	37.9008	1.21587	1.5305e-17	4.85417e-16
PTX3	3.12568	7.26791	1.21737	1.22234e-14	2.1794e-13
HSPB3	16.0415	37.3261	1.21838	2.56611e-13	3.4513e-12
RNF128	8.27713	19.2734	1.21941	5.55653e-09	3.41944e-08
PDGFC	8.27624	19.2812	1.22014	1.8402e-23	2.47752e-21
MAGEA4	28.7322	67.2797	1.2275	3.97803e-06	1.40676e-05
CSPG4	33.8203	79.2777	1.22902	1.36301e-13	1.93789e-12
IGFN1	0.550596	1.29613	1.23514	2.9269e-10	2.30855e-09
PMEPA1	50.0931	117.979	1.23585	1.26013e-23	1.78777e-21
AC008687.4	0.430123	1.0133	1.23624	1.19994e-15	2.57013e-14
ANO1	61.6453	145.279	1.23676	6.494e-18	2.24298e-16
CYP4F11	17.6471	41.6778	1.23985	2.04699e-06	7.6575e-06
NKD1	1.0402	2.45889	1.24115	9.32849e-07	3.71733e-06
HOXA11	0.956599	2.26401	1.2429	2.82476e-12	3.16567e-11
CDH13	5.73765	13.5925	1.24428	9.0299e-19	4.16575e-17
VGF	0.620895	1.47316	1.2465	0.0017359	0.00356418
AQP10	0.360052	0.855357	1.24832	5.98911e-13	7.51144e-12
TIMP3	97.4896	231.716	1.24904	3.2283e-23	3.9439e-21
NKX2-8	1.03535	2.46097	1.2491	6.31278e-12	6.71159e-11
FBN2	6.88769	16.3747	1.24938	1.10052e-08	6.41358e-08
COL28A1	0.850043	2.02325	1.25107	1.26218e-07	6.02502e-07
SLC35F3	2.20609	5.25772	1.25294	1.51316e-17	4.81076e-16
PAEP	2.43157	5.79658	1.25331	4.40914e-11	4.02033e-10
METTL11B	0.314919	0.752208	1.25615	2.91865e-16	7.27953e-15
LHX5	1.30451	3.12013	1.25809	1.07616e-17	3.53206e-16
TNC	212.398	508.066	1.25824	1.54306e-16	4.08e-15
HAS2	5.88575	14.1239	1.26284	3.03905e-13	4.01775e-12
CEP126	0.720374	1.72892	1.26306	4.49174e-06	1.57241e-05
SEMA3C	30.8325	74.0154	1.26337	6.35298e-21	4.84515e-19
SLCO1B3	1.54714	3.72771	1.26868	5.95836e-11	5.29391e-10
ST8SIA2	0.761522	1.84364	1.2756	2.70251e-13	3.61266e-12
LAMB3	395.268	958.516	1.27797	7.34912e-29	4.40747e-26
HOXB8	0.357927	0.868753	1.27928	3.20998e-05	9.4054e-05
IL31RA	1.04947	2.5532	1.28265	2.18613e-23	2.82783e-21
MAGEA11	4.19836	10.2202	1.28353	0.000123197	0.000321111
PLAU	148.759	363.619	1.28945	1.72727e-28	8.76521e-26
CFAP58	0.412719	1.00972	1.29073	1.1669e-14	2.09186e-13
SLC22A1	1.87296	4.58965	1.29307	5.05344e-06	1.75e-05
MYH3	6.14909	15.1171	1.29773	1.60409e-05	4.99396e-05
THBS1	61.9643	153.246	1.30634	1.23635e-17	4.00797e-16
IL24	10.5312	26.0689	1.30766	2.7877e-08	1.50803e-07
F3	123.491	306.025	1.30924	7.8734e-15	1.45697e-13
COL2A1	0.700588	1.74264	1.31463	7.94659e-13	9.80797e-12
SLC7A11	9.67324	24.1603	1.32057	2.24697e-07	1.01773e-06
NEFM	5.52412	13.8113	1.32203	7.04995e-06	2.37047e-05
HTR7	5.26168	13.1923	1.3261	4.80977e-20	2.93797e-18
HAS1	1.51498	3.79898	1.32632	2.56823e-07	1.15256e-06
SLC6A17	0.454981	1.1457	1.33235	7.35276e-05	0.000199702
FOXI3	0.753448	1.91335	1.34452	1.84202e-05	5.66783e-05
LRRC38	0.967863	2.45858	1.34495	3.58787e-12	3.95145e-11
TSPAN2	2.0962	5.35258	1.35246	1.66116e-13	2.32669e-12
PRSS23	21.7518	55.5763	1.35334	2.55546e-27	1.02172e-24
MMP1	474.186	1213.45	1.35559	4.89949e-15	9.43705e-14
GAST	8.78803	22.4971	1.35613	1.98486e-07	9.08367e-07
DSCAM	0.337515	0.865231	1.35813	1.04687e-09	7.43003e-09
GLIS1	1.5241	3.91324	1.36041	1.22488e-12	1.46652e-11
CHRNG	0.269477	0.694409	1.36562	2.14071e-07	9.73616e-07
ARSI	18.2725	47.0917	1.3658	5.25286e-23	6.30056e-21
VEPH1	0.265291	0.68392	1.36625	3.18463e-12	3.54582e-11
NKAIN2	0.552776	1.42515	1.36635	1.12769e-05	3.63074e-05
SP8	0.359057	0.925933	1.36669	2.74247e-09	1.80921e-08
C1QL4	0.378779	0.978131	1.36867	3.40328e-17	1.01361e-15
STC2	8.45818	21.8615	1.36998	1.15475e-22	1.25916e-20
IL11	5.59319	14.48	1.37232	1.01483e-24	2.12533e-22
POPDC3	4.49645	11.6521	1.37373	9.36698e-24	1.40441e-21
FOXL2NB	0.350967	0.911416	1.37677	1.6929e-09	1.16032e-08
SERPINE2	27.0888	70.7625	1.38529	8.4245e-16	1.88076e-14
NTSR1	0.733381	1.91965	1.38821	0.00434965	0.00815536
ANXA13	0.284497	0.745611	1.39001	2.10833e-12	2.4126e-11
MFAP5	14.1977	37.4084	1.3977	6.12206e-11	5.42474e-10
ADAMTS6	0.495043	1.30758	1.40128	4.69063e-16	1.1131e-14
GDNF	0.604309	1.60282	1.40726	2.18442e-08	1.20452e-07
RXRG	0.328793	0.888208	1.43372	6.30941e-05	0.000173574
FSTL3	31.5872	85.4773	1.4362	2.31991e-32	4.23683e-29
KANK4	2.59647	7.05795	1.44269	1.19443e-20	8.61163e-19
ITGA5	48.0442	131.438	1.45195	7.00429e-33	1.54024e-29
GDF6	0.375599	1.03305	1.45965	1.41051e-10	1.18688e-09
PLPPR1	0.426669	1.17677	1.46365	0.0089672	0.0156478
BCHE	1.80104	4.98862	1.46981	2.28501e-10	1.84281e-09
IGFL3	8.18817	22.6823	1.46996	9.50867e-12	9.73292e-11
PROC	2.20809	6.13309	1.47382	7.26792e-17	2.04028e-15
SCN5A	0.409704	1.13801	1.47386	3.25037e-06	1.16663e-05
C11orf87	0.422744	1.17807	1.47857	1.39995e-07	6.62673e-07
ADAMTS15	5.07092	14.1395	1.47941	6.04826e-23	7.12506e-21
ZNF474	0.951218	2.65701	1.48196	7.85294e-15	1.45522e-13
AJAP1	1.48049	4.15046	1.4872	9.26099e-09	5.46709e-08
GAP43	1.77649	4.98045	1.48724	5.25348e-07	2.19767e-06
KCNF1	0.515578	1.44665	1.48845	1.21038e-16	3.26581e-15
ASCL5	0.258863	0.72656	1.48889	4.12924e-14	6.59579e-13
SHANK2	1.6863	4.73525	1.48958	3.80159e-20	2.41883e-18
SEMA3A	1.84753	5.2116	1.49613	5.86489e-14	9.02933e-13
SOHLH2	0.274987	0.776969	1.4985	3.33863e-08	1.77477e-07
CREG2	1.45785	4.15157	1.50981	3.23956e-21	2.60627e-19
NGF	2.92071	8.3271	1.5115	1.34743e-20	9.60973e-19
WNT7A	4.23337	12.0732	1.51193	2.00569e-23	2.67304e-21
VEGFC	15.1931	43.6589	1.52286	2.31272e-21	1.98143e-19
SIX3	0.233817	0.672311	1.52375	0.0178436	0.0288727
CAV1	164.351	474.245	1.52885	6.15372e-29	3.8663e-26
SMOC1	3.32091	9.64391	1.53804	1.85397e-10	1.52217e-09
SFRP5	0.511398	1.49673	1.54929	0.00410964	0.00774608
MAGEB2	4.58553	13.4512	1.55257	0.000920865	0.00200559
SYT7	6.12128	18.0035	1.55637	2.44429e-24	4.60714e-22
SCG2	2.31385	6.82293	1.5601	1.46643e-10	1.23079e-09
PTHLH	69.2532	205.287	1.56769	9.92616e-27	3.53962e-24
GAL	5.64041	16.7411	1.56953	1.35464e-05	4.2892e-05
FN1	217.965	651.424	1.5795	8.27753e-13	1.01784e-11
CAMK2N1	14.5218	43.4464	1.58102	2.56894e-32	4.23683e-29
CLDN6	0.905425	2.72062	1.58727	1.25075e-05	3.98995e-05
AMIGO2	13.9692	42.3458	1.59997	3.76235e-30	2.92003e-27
IL13RA2	2.97477	9.04865	1.60492	0.000816407	0.00179618
CCNA1	10.0165	30.5215	1.60745	2.75335e-14	4.60427e-13
SLC6A2	1.64726	5.0238	1.60871	6.61192e-16	1.5093e-14
HTR1D	0.489635	1.4996	1.6148	2.84185e-18	1.07745e-16
TRIML2	1.03164	3.17912	1.62369	8.5764e-12	8.87506e-11
FAM166C	0.221078	0.683212	1.62778	3.93438e-12	4.30077e-11
MATN3	1.46542	4.56864	1.64045	6.80428e-21	5.13004e-19
FREM2	0.868976	2.71271	1.64235	0.00153655	0.00319565
FLRT2	2.11497	6.61616	1.64536	2.34478e-26	7.27115e-24
TRIM9	0.480539	1.52037	1.6617	8.96123e-16	1.98713e-14
AREG	62.8542	199.781	1.66834	7.33689e-23	8.34508e-21
MAGEA10	1.97991	6.32621	1.67591	0.00169735	0.00349222
LHX1	0.60844	1.95042	1.6806	1.21792e-14	2.17445e-13
ADD2	0.922949	2.97987	1.69093	2.4308e-05	7.28579e-05
SCG5	2.637	8.51772	1.69157	6.8765e-25	1.48735e-22
PCSK1N	2.35613	7.61183	1.69182	0.000310494	0.000745388
APCDD1L	2.51498	8.17991	1.70154	3.02373e-24	5.46508e-22
IRX1	1.33571	4.37886	1.71295	0.0123688	0.0208635
SRPX	11.7875	38.953	1.72448	2.07335e-23	2.73557e-21
NT5E	17.7172	58.6339	1.72659	5.13189e-26	1.44064e-23
SALL1	0.367663	1.22198	1.73277	3.86039e-11	3.56931e-10
CCBE1	0.686961	2.28352	1.73296	1.21883e-18	5.34263e-17
MYMK	0.570477	1.89995	1.73572	1.59897e-07	7.48112e-07
DISP2	0.424147	1.42185	1.74513	3.81322e-20	2.41883e-18
DHRS2	3.93436	13.2879	1.75592	1.5832e-08	8.97669e-08
LAMA3	53.9058	182.11	1.7563	6.3405e-27	2.39019e-24
EVA1A	5.32983	18.2333	1.77442	1.51099e-27	6.87446e-25
SUN3	0.580414	1.9864	1.77501	1.09421e-13	1.59173e-12
NOG	0.657453	2.31711	1.81737	3.74941e-11	3.48378e-10
SLITRK6	6.41915	22.6732	1.82054	2.66625e-18	1.01971e-16
TLL1	1.25009	4.44272	1.82941	1.26996e-18	5.52999e-17
LAMC2	299.16	1070.54	1.83935	2.99544e-31	3.29348e-28
TGFBI	165.602	593.371	1.84121	3.32677e-32	4.87704e-29
CDH2	0.817447	2.95865	1.85574	6.05927e-14	9.28525e-13
DKK1	9.93109	36.3926	1.87362	2.33471e-21	1.98737e-19
KISS1	0.914097	3.36083	1.8784	0.00343029	0.00659564
ELFN2	0.312609	1.15872	1.8901	1.40724e-10	1.18489e-09
SERPINE1	168.854	626.484	1.8915	2.59364e-34	8.69463e-31
INHBA	22.5479	83.9367	1.89631	2.90452e-31	3.29348e-28
SYT13	0.380934	1.41925	1.89752	6.52248e-09	3.95303e-08
FRMD5	0.364484	1.3806	1.92137	2.7967e-19	1.43581e-17
PSG5	0.19166	0.74112	1.95116	8.00111e-10	5.80036e-09
LRRN4	0.304005	1.1831	1.9604	5.23586e-12	5.62098e-11
MYO7B	0.593398	2.30934	1.96041	2.47013e-05	7.38353e-05
KLHL4	0.260645	1.01639	1.96329	1.88143e-13	2.61852e-12
FGF19	2.55463	9.9913	1.96756	6.63039e-08	3.34026e-07
SPOCK1	5.69769	22.5359	1.98378	1.66547e-27	7.3221e-25
RSPO4	0.542523	2.21441	2.02916	0.0164352	0.0268374
ROS1	0.589265	2.40917	2.03155	1.24052e-14	2.20882e-13
JPH3	0.237272	1.00022	2.0757	0.000416984	0.000972481
L1CAM	2.6322	11.1352	2.08079	1.61806e-14	2.80166e-13
TH	1.02994	4.43369	2.10596	1.47221e-12	1.73122e-11
KRTAP2-3	0.311365	1.34292	2.1087	3.35507e-06	1.20127e-05
GPR50	1.56773	6.76211	2.10879	4.48476e-07	1.90325e-06
CSF2	5.09878	22.1289	2.11771	1.0571e-16	2.88168e-15
HMGA2	3.1541	14.2744	2.17813	2.07804e-25	5.17315e-23
MMP13	70.4621	319.458	2.18071	8.26467e-20	4.8464e-18
PTPRN	0.290145	1.31751	2.18297	4.11142e-21	3.24827e-19
FOLR3	2.79842	12.8204	2.19576	2.41129e-11	2.31211e-10
RXFP1	0.157568	0.753644	2.25791	9.90402e-05	0.000262925
SPOCK3	0.679971	3.2534	2.2584	8.62254e-10	6.20315e-09
ANXA10	1.00577	4.92867	2.2929	0.0296567	0.0454724
GOLGA6L7	0.264352	1.30287	2.30116	0.0049387	0.00916215
MYL4	1.10842	5.4914	2.30867	3.69108e-07	1.5962e-06
FOXA2	0.331681	1.68043	2.34096	1.85743e-21	1.63379e-19
ZFP42	0.696526	3.55234	2.35052	2.0602e-12	2.36162e-11
MMP10	94.1446	486.579	2.36972	1.53222e-22	1.59182e-20
CHGB	8.58714	50.9909	2.56999	4.47844e-18	1.60567e-16
TFPI2	4.03117	27.5014	2.77023	9.68294e-08	4.71427e-07
IFNK	0.504905	3.52547	2.80373	6.52033e-09	3.95303e-08
CGB8	0.229011	1.6613	2.85883	2.68322e-19	1.38833e-17
SPANXB1	1.32833	11.5882	3.12497	8.18928e-08	4.04528e-07
CGB5	0.222154	2.05539	3.20978	6.78218e-11	5.96959e-10
FGF5	0.0905989	0.88564	3.28915	5.05159e-18	1.78211e-16

## Sheet: S5
ONTOLOGY	ID	Description	GeneRatio	BgRatio	pvalue	p.adjust	qvalue	geneID	Count
BP	GO:0030098	lymphocyte differentiation	54/397	429/18870	1.3954e-26	4.63135e-23	4.04961e-23	BATF/BCL2/CCL19/CCR2/CCR7/CD19/CD2/CD27/CD28/CD3D/CD3E/CD3G/CD40LG/CD79A/CD79B/CD8A/CR2/CRTAM/EOMES/FCRL3/FLT3/FOXJ1/FUT7/GPR18/IFNG/IKZF1/IKZF3/IL2RG/IRF4/IRF8/ITK/LCK/LY9/MS4A1/MYB/NKX2-3/PLA2G2D/POU2AF1/PTPRC/RASGRP1/RHOH/SASH3/SLAMF1/SLAMF6/SPINK5/SPN/TBX21/TESPA1/THEMIS/TNFSF8/VCAM1/VNN1/ZAP70/ZNF683	54
BP	GO:1903131	mononuclear cell differentiation	55/397	481/18870	5.62073e-25	9.3276e-22	8.15597e-22	BATF/BCL2/CCL19/CCR2/CCR7/CD19/CD2/CD27/CD28/CD3D/CD3E/CD3G/CD40LG/CD79A/CD79B/CD8A/CR2/CRTAM/EOMES/FCRL3/FLT3/FOXJ1/FUT7/GPR18/IFNG/IKZF1/IKZF3/IL2RG/IL34/IRF4/IRF8/ITK/LCK/LY9/MS4A1/MYB/NKX2-3/PLA2G2D/POU2AF1/PTPRC/RASGRP1/RHOH/SASH3/SLAMF1/SLAMF6/SPINK5/SPN/TBX21/TESPA1/THEMIS/TNFSF8/VCAM1/VNN1/ZAP70/ZNF683	55
BP	GO:0030217	T cell differentiation	41/397	307/18870	2.53091e-21	2.80003e-18	2.44832e-18	BATF/BCL2/CCL19/CCR2/CCR7/CD2/CD27/CD28/CD3D/CD3E/CD3G/CD8A/CRTAM/EOMES/FOXJ1/FUT7/GPR18/IFNG/IKZF3/IL2RG/IRF4/ITK/LCK/LY9/MYB/NKX2-3/PLA2G2D/PTPRC/RASGRP1/RHOH/SASH3/SLAMF6/SPINK5/SPN/TBX21/TESPA1/THEMIS/TNFSF8/VNN1/ZAP70/ZNF683	41
BP	GO:0046631	alpha-beta T cell activation	32/397	181/18870	1.31753e-20	1.09322e-17	9.559e-18	BATF/BCL2/CCL19/CCR2/CD247/CD28/CD3D/CD3E/CD3G/CRTAM/EOMES/FUT7/GPR18/IFNG/IL2RG/IRF4/ITK/LY9/MYB/NKG7/NKX2-3/PLA2G2D/PTPRC/RASAL3/SASH3/SLAMF6/SPN/TBX21/TNFSF8/WDFY4/ZAP70/ZNF683	32
BP	GO:0050851	antigen receptor-mediated signaling pathway	32/397	205/18870	6.42902e-19	4.26758e-16	3.73154e-16	BANK1/BCL2/BLK/BTNL9/CCR7/CD19/CD22/CD247/CD28/CD3D/CD3E/CD3G/CD79A/CD79B/CD8A/CD8B/FCRL3/ITK/LAX1/LCK/MS4A1/PRKCB/PTPRC/SH2D1A/SLA2/STAP1/TESPA1/THEMIS/TMIGD2/TRAT1/UBASH3A/ZAP70	32
BP	GO:0002768	immune response-regulating cell surface receptor signaling pathway	39/397	346/18870	1.03468e-17	5.72351e-15	5.00459e-15	BANK1/BCL2/BLK/BTLA/BTNL9/CCR7/CD19/CD22/CD247/CD28/CD3D/CD3E/CD3G/CD79A/CD79B/CD8A/CD8B/CR2/FCER2/FCRL3/ITK/LAX1/LCK/LILRA4/LTF/MS4A1/NCR3/PRKCB/PTPRC/SCIMP/SH2D1A/SLA2/STAP1/TESPA1/THEMIS/TMIGD2/TRAT1/UBASH3A/ZAP70	39
BP	GO:0050863	regulation of T cell activation	40/397	381/18870	4.74012e-17	2.24749e-14	1.96519e-14	BATF/CCL19/CCR2/CCR7/CD2/CD27/CD28/CD3E/CD40LG/CD5/CD6/CORO1A/CRTAM/FOXJ1/IFNG/IL2RG/IRF4/LAX1/LCK/PLA2G2D/PTPRC/RASAL3/RASGRP1/RHOH/SASH3/SIRPG/SIT1/SLAMF1/SPINK5/SPN/TBX21/TESPA1/TIGIT/TMIGD2/TNFRSF13C/TNFSF8/VCAM1/VNN1/ZAP70/ZNF683	40
BP	GO:0002443	leukocyte mediated immunity	44/397	466/18870	6.48967e-17	2.6924e-14	2.35421e-14	BATF/C7/C8G/CCR2/CD177/CD19/CD2/CD27/CD28/CD40LG/CD8A/CD96/CORO1A/CR2/CRTAM/CSF2RB/DNASE1L3/FCER2/FOXJ1/FUT7/GAPT/GZMM/IGLL1/IGLL5/IL21R/KLRB1/LTA/NCR3/NKG7/NOS2/PTGDS/PTPRC/RASGRP1/SASH3/SCIMP/SCNN1B/SH2D1A/SLA2/SLAMF1/SLAMF6/SPN/STAP1/SUSD4/TBX21	44
BP	GO:0002429	immune response-activating cell surface receptor signaling pathway	36/397	318/18870	1.72779e-16	6.3717e-14	5.57136e-14	BANK1/BCL2/BLK/BTNL9/CCR7/CD19/CD22/CD247/CD28/CD3D/CD3E/CD3G/CD79A/CD79B/CD8A/CD8B/CR2/FCRL3/ITK/LAX1/LCK/LTF/MS4A1/NCR3/PRKCB/PTPRC/SCIMP/SH2D1A/SLA2/STAP1/TESPA1/THEMIS/TMIGD2/TRAT1/UBASH3A/ZAP70	36
BP	GO:0042113	B cell activation	33/397	278/18870	8.14059e-16	2.70186e-13	2.36248e-13	BANK1/BATF/BCL2/CD19/CD22/CD27/CD28/CD40LG/CD79A/CD79B/CR2/FCRL3/FLT3/FOXJ1/GAPT/IKZF3/IL2RG/IRF8/LAX1/MS4A1/MZB1/NKX2-3/POU2AF1/PRKCB/PTPRC/RASGRP1/SASH3/TBC1D10C/TBX21/TNFRSF13B/TNFRSF13C/VCAM1/ZAP70	33
BP	GO:0007159	leukocyte cell-cell adhesion	40/397	419/18870	1.26266e-15	3.8098e-13	3.33125e-13	CCL19/CCR2/CCR7/CD177/CD27/CD28/CD3E/CD40LG/CD5/CD6/CHST4/CORO1A/CRTAM/FOXJ1/FUT7/GP1BA/IFNG/IL2RG/ITGAL/ITGB7/LAX1/LCK/PLA2G2D/PTPRC/RASAL3/RASGRP1/RHOH/SASH3/SELL/SIRPG/SLAMF1/SPN/TBX21/TESPA1/TIGIT/TMIGD2/TNFRSF13C/VCAM1/VNN1/ZAP70	40
BP	GO:0002449	lymphocyte mediated immunity	37/397	368/18870	3.03298e-15	8.38873e-13	7.33503e-13	BATF/C7/C8G/CCR2/CD19/CD2/CD27/CD28/CD40LG/CD8A/CD96/CORO1A/CR2/CRTAM/CSF2RB/FCER2/FOXJ1/FUT7/GAPT/GZMM/IGLL1/IGLL5/IL21R/KLRB1/LTA/NCR3/NKG7/PTPRC/RASGRP1/SASH3/SH2D1A/SLA2/SLAMF1/SLAMF6/SPN/SUSD4/TBX21	37
BP	GO:0002764	immune response-regulating signaling pathway	43/397	500/18870	4.33203e-15	1.106e-12	9.67078e-13	BANK1/BCL2/BLK/BTLA/BTNL9/CCR7/CD19/CD22/CD247/CD28/CD3D/CD3E/CD3G/CD79A/CD79B/CD8A/CD8B/CR2/ESR1/FCER2/FCRL3/IRF4/ITK/LAX1/LCK/LILRA4/LTF/MS4A1/NCR3/NLRC3/PRKCB/PTPRC/SCIMP/SH2D1A/SLA2/STAP1/TESPA1/THEMIS/TLR10/TMIGD2/TRAT1/UBASH3A/ZAP70	43
BP	GO:0046651	lymphocyte proliferation	33/397	307/18870	1.50142e-14	3.32966e-12	2.91142e-12	BCL2/CCL19/CCR2/CD19/CD22/CD28/CD3E/CD40LG/CD6/CD79A/CORO1A/CR2/CRTAM/FCRL3/FLT3/FOXJ1/GAPT/IKZF3/MS4A1/MZB1/PLA2G2D/PTPRC/RASAL3/RASGRP1/SASH3/SLAMF1/SPN/TMIGD2/TNFRSF13B/TNFRSF13C/TNFSF8/VCAM1/ZAP70	33
BP	GO:0002757	immune response-activating signaling pathway	41/397	473/18870	1.50482e-14	3.32966e-12	2.91142e-12	BANK1/BCL2/BLK/BTNL9/CCR7/CD19/CD22/CD247/CD28/CD3D/CD3E/CD3G/CD79A/CD79B/CD8A/CD8B/CR2/ESR1/FCRL3/IRF4/ITK/LAX1/LCK/LILRA4/LTF/MS4A1/NCR3/NLRC3/PRKCB/PTPRC/SCIMP/SH2D1A/SLA2/STAP1/TESPA1/THEMIS/TLR10/TMIGD2/TRAT1/UBASH3A/ZAP70	41
BP	GO:0070661	leukocyte proliferation	35/397	350/18870	2.08067e-14	4.3161e-12	3.77396e-12	BCL2/CCL19/CCR2/CD19/CD22/CD28/CD3E/CD40LG/CD6/CD79A/CORO1A/CR2/CRTAM/CSF2RB/FCRL3/FLT3/FOXJ1/GAPT/IKZF3/IL34/MS4A1/MZB1/PLA2G2D/PTPRC/RASAL3/RASGRP1/SASH3/SLAMF1/SPN/TMIGD2/TNFRSF13B/TNFRSF13C/TNFSF8/VCAM1/ZAP70	35
BP	GO:0032943	mononuclear cell proliferation	33/397	314/18870	2.88038e-14	5.62352e-12	4.91716e-12	BCL2/CCL19/CCR2/CD19/CD22/CD28/CD3E/CD40LG/CD6/CD79A/CORO1A/CR2/CRTAM/FCRL3/FLT3/FOXJ1/GAPT/IKZF3/MS4A1/MZB1/PLA2G2D/PTPRC/RASAL3/RASGRP1/SASH3/SLAMF1/SPN/TMIGD2/TNFRSF13B/TNFRSF13C/TNFSF8/VCAM1/ZAP70	33
BP	GO:1903037	regulation of leukocyte cell-cell adhesion	36/397	382/18870	5.37137e-14	9.90422e-12	8.66016e-12	CCL19/CCR2/CCR7/CD27/CD28/CD3E/CD40LG/CD5/CD6/CHST4/CORO1A/CRTAM/FOXJ1/FUT7/GP1BA/IFNG/IL2RG/LAX1/LCK/PLA2G2D/PTPRC/RASAL3/RASGRP1/RHOH/SASH3/SIRPG/SLAMF1/SPN/TBX21/TESPA1/TIGIT/TMIGD2/TNFRSF13C/VCAM1/VNN1/ZAP70	36
BP	GO:0022409	positive regulation of cell-cell adhesion	33/397	322/18870	5.93077e-14	1.03601e-11	9.0588e-12	CCL19/CCR2/CCR7/CD27/CD28/CD3E/CD40LG/CD5/CD6/CHST4/CORO1A/CXCL13/FOXA1/FUT3/FUT7/GP1BA/IFNG/IL2RG/LCK/PTPRC/RASAL3/RASGRP1/RHOH/SASH3/SIRPG/SLAMF1/SPN/TESPA1/TMIGD2/TNFRSF13C/VCAM1/VNN1/ZAP70	33
BP	GO:0002697	regulation of immune effector process	36/397	389/18870	9.32806e-14	1.54799e-11	1.35355e-11	BATF/CCL19/CCR2/CD177/CD22/CD28/CD40LG/CD96/CR2/CRTAM/DNASE1L3/FCER2/FCRL3/FOXJ1/FUT7/IFNG/IRF4/KLRB1/LTA/MZB1/NCF1/NCR3/NOS2/PTPRC/RASGRP1/SASH3/SCIMP/SH2D1A/SLAMF1/SLAMF6/SPINK5/SPN/STAP1/SUSD4/TBX21/ZNF683	36
BP	GO:0046632	alpha-beta T cell differentiation	21/397	124/18870	1.47186e-13	2.32624e-11	2.03405e-11	BATF/BCL2/CCL19/EOMES/FUT7/GPR18/IFNG/IL2RG/IRF4/ITK/LY9/MYB/NKX2-3/PLA2G2D/SASH3/SLAMF6/SPN/TBX21/TNFSF8/ZAP70/ZNF683	21
BP	GO:0045058	T cell selection	15/397	53/18870	1.62558e-13	2.41462e-11	2.11132e-11	BATF/BCL2/CCR7/CD28/CD3D/CD3E/CD3G/IRF4/LY9/PTPRC/SLAMF6/SPN/TBX21/THEMIS/ZAP70	15
BP	GO:1903039	positive regulation of leukocyte cell-cell adhesion	30/397	275/18870	1.67328e-13	2.41462e-11	2.11132e-11	CCL19/CCR2/CCR7/CD27/CD28/CD3E/CD40LG/CD5/CD6/CHST4/CORO1A/FUT7/GP1BA/IFNG/IL2RG/LCK/PTPRC/RASAL3/RASGRP1/RHOH/SASH3/SIRPG/SLAMF1/SPN/TESPA1/TMIGD2/TNFRSF13C/VCAM1/VNN1/ZAP70	30
BP	GO:0022407	regulation of cell-cell adhesion	40/397	493/18870	2.7915e-13	3.86041e-11	3.37551e-11	CCL19/CCR2/CCR7/CD27/CD28/CD3E/CD40LG/CD5/CD6/CHST4/CORO1A/CRTAM/CXCL13/FOXA1/FOXJ1/FUT3/FUT7/GP1BA/IFNG/IL2RG/LAX1/LCK/MUC21/PLA2G2D/PTPRC/RASAL3/RASGRP1/RHOH/SASH3/SIRPG/SLAMF1/SPN/TBX21/TESPA1/TIGIT/TMIGD2/TNFRSF13C/VCAM1/VNN1/ZAP70	40
BP	GO:0050867	positive regulation of cell activation	35/397	396/18870	8.04327e-13	1.06782e-10	9.33697e-11	BCL2/CCL19/CCR2/CCR7/CD177/CD2/CD27/CD28/CD3E/CD40LG/CD5/CD6/CORO1A/FCRL3/GP1BA/IFNG/IL2RG/LCK/MYB/PTPRC/RASAL3/RASGRP1/RHOH/SASH3/SIRPG/SLAMF1/SPN/STAP1/TBX21/TESPA1/TMIGD2/TNFRSF13C/VCAM1/VNN1/ZAP70	35
BP	GO:0043368	positive T cell selection	13/397	40/18870	9.36443e-13	1.19541e-10	1.04525e-10	BATF/BCL2/CD3D/CD3E/CD3G/IRF4/LY9/PTPRC/SLAMF6/SPN/TBX21/THEMIS/ZAP70	13
BP	GO:0002263	cell activation involved in immune response	30/397	305/18870	2.48528e-12	3.05505e-10	2.67131e-10	BATF/CCL19/CCR2/CD177/CD19/CD28/CD40LG/CORO1A/DNASE1L3/EOMES/GAPT/IFNG/IRF4/IRF8/ITGAL/LY9/MYB/NKG7/NKX2-3/POU2AF1/PTGDS/PTPRC/RASGRP1/SCNN1B/SLAMF1/SLAMF6/SPN/TBX21/TCIM/ZNF683	30
BP	GO:0070663	regulation of leukocyte proliferation	28/397	267/18870	2.90624e-12	3.44493e-10	3.01222e-10	BCL2/CCL19/CCR2/CD22/CD28/CD3E/CD40LG/CD6/CORO1A/CRTAM/CSF2RB/FCRL3/FOXJ1/IKZF3/IL34/MZB1/PLA2G2D/PTPRC/RASAL3/SASH3/SLAMF1/SPN/TMIGD2/TNFRSF13B/TNFRSF13C/TNFSF8/VCAM1/ZAP70	28
BP	GO:0050870	positive regulation of T cell activation	27/397	251/18870	3.94851e-12	4.519e-10	3.95137e-10	CCL19/CCR2/CCR7/CD27/CD28/CD3E/CD40LG/CD5/CD6/CORO1A/IFNG/IL2RG/LCK/PTPRC/RASAL3/RASGRP1/RHOH/SASH3/SIRPG/SLAMF1/SPN/TESPA1/TMIGD2/TNFRSF13C/VCAM1/VNN1/ZAP70	27
BP	GO:0002696	positive regulation of leukocyte activation	33/397	380/18870	6.03861e-12	6.68072e-10	5.84156e-10	BCL2/CCL19/CCR2/CCR7/CD177/CD2/CD27/CD28/CD3E/CD40LG/CD5/CD6/CORO1A/FCRL3/IFNG/IL2RG/LCK/PTPRC/RASAL3/RASGRP1/RHOH/SASH3/SIRPG/SLAMF1/SPN/STAP1/TBX21/TESPA1/TMIGD2/TNFRSF13C/VCAM1/VNN1/ZAP70	33
BP	GO:0050670	regulation of lymphocyte proliferation	26/397	238/18870	7.01675e-12	7.51245e-10	6.56883e-10	BCL2/CCL19/CCR2/CD22/CD28/CD3E/CD40LG/CD6/CORO1A/CRTAM/FCRL3/FOXJ1/IKZF3/MZB1/PLA2G2D/PTPRC/RASAL3/SASH3/SLAMF1/SPN/TMIGD2/TNFRSF13B/TNFRSF13C/TNFSF8/VCAM1/ZAP70	26
BP	GO:0002366	leukocyte activation involved in immune response	29/397	301/18870	9.73522e-12	1.00973e-09	8.82895e-10	BATF/CCL19/CCR2/CD177/CD19/CD28/CD40LG/CORO1A/DNASE1L3/EOMES/GAPT/IFNG/IRF4/IRF8/ITGAL/LY9/MYB/NKG7/NKX2-3/POU2AF1/PTGDS/PTPRC/RASGRP1/SCNN1B/SLAMF1/SLAMF6/SPN/TBX21/ZNF683	29
BP	GO:0032944	regulation of mononuclear cell proliferation	26/397	242/18870	1.02683e-11	1.03274e-09	9.0302e-10	BCL2/CCL19/CCR2/CD22/CD28/CD3E/CD40LG/CD6/CORO1A/CRTAM/FCRL3/FOXJ1/IKZF3/MZB1/PLA2G2D/PTPRC/RASAL3/SASH3/SLAMF1/SPN/TMIGD2/TNFRSF13B/TNFRSF13C/TNFSF8/VCAM1/ZAP70	26
BP	GO:0051251	positive regulation of lymphocyte activation	30/397	330/18870	1.83481e-11	1.7911e-09	1.56612e-09	BCL2/CCL19/CCR2/CCR7/CD27/CD28/CD3E/CD40LG/CD5/CD6/CORO1A/FCRL3/IFNG/IL2RG/LCK/PTPRC/RASAL3/RASGRP1/RHOH/SASH3/SIRPG/SLAMF1/SPN/TBX21/TESPA1/TMIGD2/TNFRSF13C/VCAM1/VNN1/ZAP70	30
BP	GO:0002460	adaptive immune response based on somatic recombination of immune receptors built from immunoglobulin superfamily domains	32/397	380/18870	2.86971e-11	2.7213e-09	2.37948e-09	BATF/C7/C8G/CCL19/CCR2/CD19/CD27/CD28/CD40LG/CD8A/CR2/CSF2RB/CXCL13/FCER2/FOXJ1/FUT7/GAPT/GZMM/IGLL1/IGLL5/IL21R/IRF4/LTA/LY9/PTPRC/SASH3/SLA2/SLAMF1/SLAMF6/SPN/SUSD4/TBX21	32
BP	GO:0050853	B cell receptor signaling pathway	15/397	77/18870	5.79498e-11	5.34265e-09	4.67157e-09	BANK1/BCL2/BLK/CD19/CD22/CD79A/CD79B/FCRL3/ITK/LCK/MS4A1/PRKCB/PTPRC/STAP1/TMIGD2	15
BP	GO:0002703	regulation of leukocyte mediated immunity	25/397	249/18870	1.12734e-10	1.01125e-08	8.8423e-09	CCR2/CD177/CD28/CD96/CR2/CRTAM/DNASE1L3/FCER2/FOXJ1/FUT7/KLRB1/LTA/NCR3/NOS2/PTPRC/RASGRP1/SASH3/SCIMP/SH2D1A/SLAMF1/SLAMF6/SPN/STAP1/SUSD4/TBX21	25
BP	GO:0001819	positive regulation of cytokine production	36/397	499/18870	1.30361e-10	1.1386e-08	9.95579e-09	BATF/C1QTNF4/CCL19/CCR2/CCR7/CD2/CD28/CD3E/CD40LG/CD6/CRTAM/CXCL17/DEFB124/IFNG/IL36A/IRF4/IRF8/ITK/LTA/LTB/LY9/MYB/NOS2/ORM2/POU2AF1/PTPRC/PYDC1/RASGRP1/SASH3/SCIMP/SLAMF1/SLAMF6/SPN/TBX21/TIGIT/TMIGD2	36
BP	GO:0045619	regulation of lymphocyte differentiation	23/397	212/18870	1.35102e-10	1.14975e-08	1.00534e-08	BATF/CCL19/CCR2/CD2/CD27/CD28/CRTAM/FCRL3/FOXJ1/IFNG/IKZF3/IL2RG/IRF4/PTPRC/RASGRP1/RHOH/SASH3/SPINK5/TBX21/TESPA1/VNN1/ZAP70/ZNF683	23
BP	GO:0050852	T cell receptor signaling pathway	19/397	144/18870	1.95765e-10	1.62436e-08	1.42032e-08	BTNL9/CCR7/CD247/CD28/CD3D/CD3E/CD3G/CD8A/CD8B/ITK/LCK/PTPRC/SH2D1A/SLA2/TESPA1/THEMIS/TRAT1/UBASH3A/ZAP70	19
BP	GO:0045580	regulation of T cell differentiation	21/397	181/18870	2.49291e-10	2.01804e-08	1.76456e-08	BATF/CCL19/CCR2/CD2/CD27/CD28/CRTAM/FOXJ1/IFNG/IL2RG/IRF4/PTPRC/RASGRP1/RHOH/SASH3/SPINK5/TBX21/TESPA1/VNN1/ZAP70/ZNF683	21
BP	GO:0070665	positive regulation of leukocyte proliferation	20/397	166/18870	3.40453e-10	2.69039e-08	2.35245e-08	BCL2/CCL19/CCR2/CD28/CD3E/CD40LG/CD6/CORO1A/CSF2RB/FCRL3/IL34/PTPRC/RASAL3/SASH3/SLAMF1/SPN/TMIGD2/TNFRSF13C/VCAM1/ZAP70	20
BP	GO:0035710	CD4-positive, alpha-beta T cell activation	17/397	119/18870	5.07001e-10	3.91334e-08	3.42179e-08	BATF/CCL19/CD28/CD3E/FUT7/IFNG/IL2RG/IRF4/LY9/MYB/NKG7/NKX2-3/PLA2G2D/SASH3/SLAMF6/SPN/TBX21	17
BP	GO:0042100	B cell proliferation	16/397	104/18870	5.35475e-10	4.03919e-08	3.53183e-08	BCL2/CD19/CD22/CD40LG/CD79A/CR2/FCRL3/GAPT/IKZF3/MS4A1/MZB1/PTPRC/RASGRP1/SASH3/TNFRSF13B/TNFRSF13C	16
BP	GO:0042102	positive regulation of T cell proliferation	16/397	105/18870	6.19751e-10	4.57101e-08	3.99685e-08	CCL19/CCR2/CD28/CD3E/CD40LG/CD6/CORO1A/PTPRC/RASAL3/SASH3/SLAMF1/SPN/TMIGD2/TNFRSF13C/VCAM1/ZAP70	16
BP	GO:0045785	positive regulation of cell adhesion	34/397	482/18870	7.85608e-10	5.66833e-08	4.95634e-08	CCL19/CCR2/CCR7/CD27/CD28/CD3E/CD40LG/CD5/CD6/CHST4/CORO1A/CXCL13/FOXA1/FUT3/FUT7/GP1BA/IFNG/IL2RG/LCK/PTPRC/RASAL3/RASGRP1/RHOH/SASH3/SIRPG/SLAMF1/SPN/SPOCK2/TESPA1/TMIGD2/TNFRSF13C/VCAM1/VNN1/ZAP70	34
BP	GO:0002285	lymphocyte activation involved in immune response	22/397	213/18870	8.8083e-10	6.22016e-08	5.43886e-08	BATF/CCL19/CD19/CD28/CD40LG/CORO1A/EOMES/GAPT/IFNG/IRF4/IRF8/ITGAL/LY9/MYB/NKG7/NKX2-3/POU2AF1/PTPRC/SLAMF6/SPN/TBX21/ZNF683	22
BP	GO:0050854	regulation of antigen receptor-mediated signaling pathway	13/397	66/18870	9.69787e-10	6.70567e-08	5.86338e-08	CCR7/CD19/CD22/FCRL3/LCK/PRKCB/PTPRC/SH2D1A/SLA2/STAP1/TESPA1/TRAT1/UBASH3A	13
BP	GO:0050900	leukocyte migration	30/397	396/18870	1.54761e-09	1.04827e-07	9.16597e-08	CCL19/CCR2/CCR5/CCR7/CD177/CHST4/CORO1A/CRTAM/CXCL13/CXCL17/CXCR3/CXCR4/DEFB124/FOXJ1/FUT7/GP1BA/GPR15/GPR18/IL34/ITGAL/ITGB7/LCK/NKX2-3/SELL/SLAMF1/SPN/STAP1/TBX21/VCAM1/ZAP70	30
BP	GO:0050671	positive regulation of lymphocyte proliferation	18/397	145/18870	1.61551e-09	1.07238e-07	9.37677e-08	BCL2/CCL19/CCR2/CD28/CD3E/CD40LG/CD6/CORO1A/FCRL3/PTPRC/RASAL3/SASH3/SLAMF1/SPN/TMIGD2/TNFRSF13C/VCAM1/ZAP70	18
BP	GO:0042129	regulation of T cell proliferation	20/397	182/18870	1.75781e-09	1.14396e-07	1.00027e-07	CCL19/CCR2/CD28/CD3E/CD40LG/CD6/CORO1A/CRTAM/FOXJ1/PLA2G2D/PTPRC/RASAL3/SASH3/SLAMF1/SPN/TMIGD2/TNFRSF13C/TNFSF8/VCAM1/ZAP70	20
BP	GO:0050864	regulation of B cell activation	17/397	130/18870	2.05224e-09	1.30988e-07	1.14535e-07	BANK1/BCL2/CD19/CD22/CD27/CD28/FCRL3/FOXJ1/IKZF3/IL2RG/MZB1/PTPRC/SASH3/TBC1D10C/TBX21/TNFRSF13B/TNFRSF13C	17
BP	GO:0001906	cell killing	22/397	223/18870	2.10041e-09	1.31533e-07	1.15012e-07	C7/C8G/CD2/CORO1A/CRTAM/DNASE1L3/FCER2/GZMH/GZMM/IFNG/KLRB1/LCE3A/LTF/NCR3/NKG7/NOS2/PTPRC/RASGRP1/SCNN1B/SH2D1A/SLAMF6/STAP1	22
BP	GO:0032946	positive regulation of mononuclear cell proliferation	18/397	148/18870	2.25674e-09	1.38706e-07	1.21283e-07	BCL2/CCL19/CCR2/CD28/CD3E/CD40LG/CD6/CORO1A/FCRL3/PTPRC/RASAL3/SASH3/SLAMF1/SPN/TMIGD2/TNFRSF13C/VCAM1/ZAP70	18
BP	GO:0043383	negative T cell selection	7/397	13/18870	2.66372e-09	1.60744e-07	1.40553e-07	CCR7/CD28/CD3E/PTPRC/SPN/THEMIS/ZAP70	7
BP	GO:0002706	regulation of lymphocyte mediated immunity	20/397	188/18870	3.10579e-09	1.84073e-07	1.60952e-07	CCR2/CD28/CD96/CR2/CRTAM/FCER2/FOXJ1/FUT7/KLRB1/LTA/NCR3/PTPRC/RASGRP1/SASH3/SH2D1A/SLAMF1/SLAMF6/SPN/SUSD4/TBX21	20
BP	GO:0033077	T cell differentiation in thymus	14/397	87/18870	3.55529e-09	2.07018e-07	1.81014e-07	BCL2/CCR7/CD28/CD3D/CD3E/CD3G/FOXJ1/IL2RG/PTPRC/RASGRP1/SPN/TESPA1/VNN1/ZAP70	14
BP	GO:1902105	regulation of leukocyte differentiation	26/397	321/18870	4.94981e-09	2.79048e-07	2.43997e-07	BATF/CCL19/CCR2/CD2/CD27/CD28/CRTAM/FCRL3/FOXJ1/GPR55/IFNG/IKZF3/IL2RG/IL34/IRF4/LTF/PTPRC/RASGRP1/RHOH/SASH3/SPINK5/TBX21/TESPA1/VNN1/ZAP70/ZNF683	26
BP	GO:0042098	T cell proliferation	21/397	213/18870	4.96048e-09	2.79048e-07	2.43997e-07	CCL19/CCR2/CD28/CD3E/CD40LG/CD6/CORO1A/CRTAM/FOXJ1/PLA2G2D/PTPRC/RASAL3/RASGRP1/SASH3/SLAMF1/SPN/TMIGD2/TNFRSF13C/TNFSF8/VCAM1/ZAP70	21
BP	GO:0006959	humoral immune response	23/397	258/18870	6.40598e-09	3.54357e-07	3.09847e-07	BCL2/C7/C8G/CCR2/CCR7/CD28/CR2/CXCL13/FCER2/FOXJ1/IFNG/JCHAIN/LGALS4/LTA/LTF/MS4A1/PDCD1/POU2AF1/PTPRC/SH2D1A/SPINK5/SUSD4/TF	23
BP	GO:0043367	CD4-positive, alpha-beta T cell differentiation	14/397	93/18870	8.6952e-09	4.73104e-07	4.13678e-07	BATF/CCL19/FUT7/IFNG/IL2RG/IRF4/LY9/MYB/NKX2-3/PLA2G2D/SASH3/SLAMF6/SPN/TBX21	14
BP	GO:0045061	thymic T cell selection	8/397	23/18870	1.33068e-08	7.12342e-07	6.22866e-07	CCR7/CD28/CD3D/CD3E/CD3G/PTPRC/SPN/ZAP70	8
BP	GO:0019724	B cell mediated immunity	20/397	208/18870	1.77212e-08	9.33599e-07	8.16331e-07	BATF/C7/C8G/CD19/CD27/CD28/CD40LG/CR2/CSF2RB/FCER2/FOXJ1/GAPT/IGLL1/IGLL5/IL21R/LTA/PTPRC/SLA2/SUSD4/TBX21	20
BP	GO:1903706	regulation of hemopoiesis	29/397	417/18870	1.98705e-08	1.03047e-06	9.01038e-07	BATF/CCL19/CCR2/CD2/CD27/CD28/CRTAM/FCRL3/FOXJ1/GPR171/GPR55/IFNG/IKZF3/IL2RG/IL34/IRF4/LTF/MYB/PTPRC/RASGRP1/RHOH/SASH3/SPINK5/TBX21/TCIM/TESPA1/VNN1/ZAP70/ZNF683	29
BP	GO:0046634	regulation of alpha-beta T cell activation	15/397	116/18870	2.14485e-08	1.09519e-06	9.57628e-07	BATF/CCL19/CCR2/CD28/CD3E/CRTAM/IFNG/IL2RG/IRF4/PTPRC/RASAL3/SASH3/TBX21/ZAP70/ZNF683	15
BP	GO:0030183	B cell differentiation	17/397	153/18870	2.49787e-08	1.25613e-06	1.09835e-06	BCL2/CD19/CD27/CD40LG/CD79A/CD79B/CR2/FCRL3/FLT3/IKZF3/IL2RG/IRF8/MS4A1/NKX2-3/POU2AF1/PTPRC/VCAM1	17
BP	GO:0031295	T cell costimulation	10/397	48/18870	4.86554e-08	2.41026e-06	2.10751e-06	CCL19/CCR7/CD28/CD3E/CD40LG/CD5/LCK/SPN/TMIGD2/TNFRSF13C	10
BP	GO:0045060	negative thymic T cell selection	6/397	12/18870	6.93381e-08	3.38431e-06	2.95921e-06	CCR7/CD28/CD3E/PTPRC/SPN/ZAP70	6
BP	GO:0016064	immunoglobulin mediated immune response	19/397	205/18870	7.29147e-08	3.48981e-06	3.05146e-06	BATF/C7/C8G/CD19/CD27/CD28/CD40LG/CR2/CSF2RB/FCER2/FOXJ1/GAPT/IGLL1/IGLL5/IL21R/LTA/PTPRC/SUSD4/TBX21	19
BP	GO:0031294	lymphocyte costimulation	10/397	50/18870	7.36025e-08	3.48981e-06	3.05146e-06	CCL19/CCR7/CD28/CD3E/CD40LG/CD5/LCK/SPN/TMIGD2/TNFRSF13C	10
BP	GO:0071674	mononuclear cell migration	19/397	207/18870	8.51085e-08	3.97852e-06	3.47879e-06	CCL19/CCR2/CCR5/CCR7/CORO1A/CRTAM/CXCL13/CXCL17/CXCR4/DEFB124/FUT7/GPR15/IL34/ITGAL/ITGB7/SLAMF1/SPN/TBX21/ZAP70	19
BP	GO:0002705	positive regulation of leukocyte mediated immunity	16/397	151/18870	1.25743e-07	5.79638e-06	5.06831e-06	CD177/CD28/CRTAM/FCER2/LTA/NCR3/NOS2/PTPRC/RASGRP1/SASH3/SCIMP/SH2D1A/SLAMF1/SLAMF6/STAP1/TBX21	16
BP	GO:0001909	leukocyte mediated cytotoxicity	15/397	140/18870	2.6941e-07	1.22489e-05	1.07104e-05	CD2/CORO1A/CRTAM/DNASE1L3/GZMM/KLRB1/NCR3/NKG7/NOS2/PTPRC/RASGRP1/SCNN1B/SH2D1A/SLAMF6/STAP1	15
BP	GO:0050901	leukocyte tethering or rolling	8/397	34/18870	4.02328e-07	1.80449e-05	1.57783e-05	CCR2/CHST4/FUT7/GP1BA/ITGB7/SELL/SPN/VCAM1	8
BP	GO:0002920	regulation of humoral immune response	9/397	47/18870	4.95639e-07	2.19337e-05	1.91786e-05	CCR7/CR2/CXCL13/FCER2/FOXJ1/LTA/PTPRC/SPINK5/SUSD4	9
BP	GO:0019722	calcium-mediated signaling	18/397	210/18870	5.17918e-07	2.2618e-05	1.9777e-05	CCR2/CCR4/CCR5/CCR7/CD22/CD3E/CXCR3/CXCR4/CXCR6/GRIN2A/PTPRC/REM1/SLA2/TBC1D10C/TRAT1/VCAM1/XCR1/ZAP70	18
BP	GO:0002363	alpha-beta T cell lineage commitment	7/397	25/18870	5.99761e-07	2.5852e-05	2.26048e-05	BATF/BCL2/IRF4/LY9/SLAMF6/SPN/TBX21	7
BP	GO:0043369	CD4-positive or CD8-positive, alpha-beta T cell lineage commitment	7/397	26/18870	8.05946e-07	3.4294e-05	2.99864e-05	BATF/BCL2/IRF4/LY9/SLAMF6/SPN/TBX21	7
BP	GO:0050857	positive regulation of antigen receptor-mediated signaling pathway	7/397	27/18870	1.06844e-06	4.48879e-05	3.92496e-05	CCR7/LCK/PRKCB/PTPRC/STAP1/TESPA1/TRAT1	7
BP	GO:0002699	positive regulation of immune effector process	20/397	270/18870	1.24052e-06	5.12764e-05	4.48356e-05	CCL19/CCR2/CD177/CD28/CRTAM/FCER2/IFNG/LTA/MZB1/NCR3/NOS2/PTPRC/RASGRP1/SASH3/SCIMP/SH2D1A/SLAMF1/SLAMF6/STAP1/TBX21	20
BP	GO:0002923	regulation of humoral immune response mediated by circulating immunoglobulin	6/397	18/18870	1.2514e-06	5.12764e-05	4.48356e-05	CR2/FCER2/FOXJ1/LTA/PTPRC/SUSD4	6
BP	GO:0072676	lymphocyte migration	13/397	124/18870	2.16212e-06	8.75132e-05	7.65208e-05	CCL19/CCR2/CCR7/CORO1A/CRTAM/CXCL13/FUT7/GPR15/ITGAL/ITGB7/SPN/TBX21/ZAP70	13
BP	GO:0002295	T-helper cell lineage commitment	6/397	20/18870	2.52118e-06	0.000100576	8.79428e-05	BATF/IRF4/LY9/SLAMF6/SPN/TBX21	6
BP	GO:0046635	positive regulation of alpha-beta T cell activation	10/397	72/18870	2.54546e-06	0.000100576	8.79428e-05	CCL19/CCR2/CD28/CD3E/IFNG/IL2RG/PTPRC/RASAL3/SASH3/ZAP70	10
BP	GO:0001776	leukocyte homeostasis	12/397	109/18870	3.17936e-06	0.000124145	0.000108551	BCL2/CCR2/CORO1A/FLT3/GAPT/GPR174/LGALS2/NKX2-3/SASH3/SIT1/TNFRSF13B/TNFRSF17	12
BP	GO:0045123	cellular extravasation	10/397	74/18870	3.28529e-06	0.000126789	0.000110863	CCR2/CD177/CHST4/FUT7/GP1BA/ITGAL/ITGB7/SELL/SPN/VCAM1	10
BP	GO:0031640	killing of cells of another organism	11/397	92/18870	3.63448e-06	0.000137078	0.00011986	C7/C8G/FCER2/GZMH/GZMM/IFNG/LCE3A/LTF/NKG7/NOS2/SCNN1B	11
BP	GO:0141061	disruption of cell in another organism	11/397	92/18870	3.63448e-06	0.000137078	0.00011986	C7/C8G/FCER2/GZMH/GZMM/IFNG/LCE3A/LTF/NKG7/NOS2/SCNN1B	11
BP	GO:0002360	T cell lineage commitment	7/397	32/18870	3.69827e-06	0.000137917	0.000120593	BATF/BCL2/IRF4/LY9/SLAMF6/SPN/TBX21	7
BP	GO:0031341	regulation of cell killing	12/397	111/18870	3.85301e-06	0.000142091	0.000124243	CRTAM/DNASE1L3/FCER2/IFNG/KLRB1/NCR3/NOS2/PTPRC/RASGRP1/SH2D1A/SLAMF6/STAP1	12
BP	GO:0002287	alpha-beta T cell activation involved in immune response	10/397	76/18870	4.20503e-06	0.00015007	0.00013122	BATF/CCL19/EOMES/IFNG/IRF4/LY9/MYB/SLAMF6/SPN/TBX21	10
BP	GO:0002293	alpha-beta T cell differentiation involved in immune response	10/397	76/18870	4.20503e-06	0.00015007	0.00013122	BATF/CCL19/EOMES/IFNG/IRF4/LY9/MYB/SLAMF6/SPN/TBX21	10
BP	GO:0031343	positive regulation of cell killing	10/397	76/18870	4.20503e-06	0.00015007	0.00013122	CRTAM/FCER2/IFNG/NCR3/NOS2/PTPRC/RASGRP1/SH2D1A/SLAMF6/STAP1	10
BP	GO:0032729	positive regulation of type II interferon production	10/397	77/18870	4.74324e-06	0.000167477	0.00014644	CCR2/CD2/CD3E/CRTAM/IRF8/LTA/RASGRP1/SASH3/SLAMF1/SLAMF6	10
BP	GO:0002228	natural killer cell mediated immunity	10/397	79/18870	6.001e-06	0.000209656	0.000183321	CD2/CD96/CORO1A/CRTAM/KLRB1/NCR3/NKG7/RASGRP1/SH2D1A/SLAMF6	10
BP	GO:0043373	CD4-positive, alpha-beta T cell lineage commitment	6/397	23/18870	6.22412e-06	0.000215186	0.000188157	BATF/IRF4/LY9/SLAMF6/SPN/TBX21	6
BP	GO:0045059	positive thymic T cell selection	5/397	14/18870	6.88111e-06	0.000235448	0.000205873	CD3D/CD3E/CD3G/PTPRC/ZAP70	5
BP	GO:0032615	interleukin-12 production	9/397	64/18870	7.30773e-06	0.000244993	0.00021422	CCL19/CCR7/CD40LG/IFNG/IRF8/LTB/SCIMP/SLAMF1/TIGIT	9
BP	GO:0032655	regulation of interleukin-12 production	9/397	64/18870	7.30773e-06	0.000244993	0.00021422	CCL19/CCR7/CD40LG/IFNG/IRF8/LTB/SCIMP/SLAMF1/TIGIT	9
BP	GO:0141060	disruption of anatomical structure in another organism	11/397	99/18870	7.47318e-06	0.000248035	0.00021688	C7/C8G/FCER2/GZMH/GZMM/IFNG/LCE3A/LTF/NKG7/NOS2/SCNN1B	11
BP	GO:0055074	calcium ion homeostasis	21/397	331/18870	7.79898e-06	0.000256285	0.000224094	ATP13A4/ATP13A5/BCL2/CCL19/CCR2/CCR5/CCR7/CD19/CORO1A/FASLG/FATE1/GP1BA/KEL/KL/LCK/NPPC/PRKCB/PTPRC/TRPV6/TSPOAP1/XCR1	21
BP	GO:0032609	type II interferon production	12/397	119/18870	7.97189e-06	0.000256881	0.000224614	CCR2/CCR7/CD2/CD3E/CD96/CRTAM/IRF8/LTA/RASGRP1/SASH3/SLAMF1/SLAMF6	12
BP	GO:0032649	regulation of type II interferon production	12/397	119/18870	7.97189e-06	0.000256881	0.000224614	CCR2/CCR7/CD2/CD3E/CD96/CRTAM/IRF8/LTA/RASGRP1/SASH3/SLAMF1/SLAMF6	12
BP	GO:0030888	regulation of B cell proliferation	9/397	65/18870	8.32652e-06	0.000265728	0.00023235	BCL2/CD22/FCRL3/IKZF3/MZB1/PTPRC/SASH3/TNFRSF13B/TNFRSF13C	9
BP	GO:0032640	tumor necrosis factor production	15/397	186/18870	9.6871e-06	0.000303316	0.000265217	C1QTNF4/CCL19/CCR2/CD2/GPR18/IFNG/LILRA4/LTF/NLRC3/ORM2/PTPRC/RASGRP1/SASH3/SLAMF1/SPN	15
BP	GO:0032680	regulation of tumor necrosis factor production	15/397	186/18870	9.6871e-06	0.000303316	0.000265217	C1QTNF4/CCL19/CCR2/CD2/GPR18/IFNG/LILRA4/LTF/NLRC3/ORM2/PTPRC/RASGRP1/SASH3/SLAMF1/SPN	15
BP	GO:0019932	second-messenger-mediated signaling	20/397	310/18870	1.00328e-05	0.000311203	0.000272113	CCR2/CCR4/CCR5/CCR7/CD22/CD3E/CXCR3/CXCR4/CXCR6/GRIN2A/NOS2/NPPC/PTPRC/REM1/SLA2/TBC1D10C/TRAT1/VCAM1/XCR1/ZAP70	20
BP	GO:0002292	T cell differentiation involved in immune response	10/397	84/18870	1.04763e-05	0.000317937	0.000278001	BATF/CCL19/EOMES/IFNG/IRF4/LY9/MYB/SLAMF6/SPN/TBX21	10
BP	GO:0046629	gamma-delta T cell activation	6/397	25/18870	1.05372e-05	0.000317937	0.000278001	CD247/CD3E/CD3G/GPR18/ITK/PTPRC	6
BP	GO:0046641	positive regulation of alpha-beta T cell proliferation	6/397	25/18870	1.05372e-05	0.000317937	0.000278001	CCR2/CD28/CD3E/PTPRC/RASAL3/ZAP70	6
BP	GO:0006968	cellular defense response	8/397	52/18870	1.19798e-05	0.000358207	0.000313213	CCR2/CCR5/ITK/KLRG1/NCF1/SH2D1A/SPN/TRAT1	8
BP	GO:0002698	negative regulation of immune effector process	12/397	125/18870	1.32173e-05	0.000387743	0.000339039	CCR2/CD22/CD96/CR2/FCRL3/FOXJ1/PTPRC/SLAMF1/SPINK5/SPN/SUSD4/TBX21	12
BP	GO:0071706	tumor necrosis factor superfamily cytokine production	15/397	191/18870	1.33181e-05	0.000387743	0.000339039	C1QTNF4/CCL19/CCR2/CD2/GPR18/IFNG/LILRA4/LTF/NLRC3/ORM2/PTPRC/RASGRP1/SASH3/SLAMF1/SPN	15
BP	GO:1903555	regulation of tumor necrosis factor superfamily cytokine production	15/397	191/18870	1.33181e-05	0.000387743	0.000339039	C1QTNF4/CCL19/CCR2/CD2/GPR18/IFNG/LILRA4/LTF/NLRC3/ORM2/PTPRC/RASGRP1/SASH3/SLAMF1/SPN	15
BP	GO:0002407	dendritic cell chemotaxis	6/397	26/18870	1.34566e-05	0.00038837	0.000339587	CCL19/CCR2/CCR5/CCR7/CXCR4/SLAMF1	6
BP	GO:0002704	negative regulation of leukocyte mediated immunity	9/397	69/18870	1.37079e-05	0.000392211	0.000342946	CCR2/CD96/CR2/FOXJ1/PTPRC/SLAMF1/SPN/SUSD4/TBX21	9
BP	GO:0072540	T-helper 17 cell lineage commitment	5/397	16/18870	1.45002e-05	0.000411334	0.000359667	BATF/IRF4/LY9/SLAMF6/TBX21	5
BP	GO:0002822	regulation of adaptive immune response based on somatic recombination of immune receptors built from immunoglobulin superfamily domains	15/397	193/18870	1.50793e-05	0.000424137	0.000370861	BATF/CCL19/CCR2/CD28/CR2/FCER2/FOXJ1/FUT7/LTA/PTPRC/SASH3/SLAMF1/SPN/SUSD4/TBX21	15
BP	GO:0002708	positive regulation of lymphocyte mediated immunity	12/397	129/18870	1.82029e-05	0.000507407	0.000443672	CD28/CRTAM/FCER2/LTA/NCR3/PTPRC/RASGRP1/SASH3/SH2D1A/SLAMF1/SLAMF6/TBX21	12
BP	GO:0002455	humoral immune response mediated by circulating immunoglobulin	8/397	55/18870	1.83455e-05	0.000507407	0.000443672	C7/C8G/CR2/FCER2/FOXJ1/LTA/PTPRC/SUSD4	8
BP	GO:0002312	B cell activation involved in immune response	10/397	90/18870	1.9409e-05	0.000532384	0.000465512	BATF/CD19/CD28/CD40LG/GAPT/IRF8/NKX2-3/POU2AF1/PTPRC/TBX21	10
BP	GO:0070098	chemokine-mediated signaling pathway	10/397	91/18870	2.14026e-05	0.000582257	0.000509121	CCL19/CCR2/CCR4/CCR5/CCR7/CXCL13/CXCR3/CXCR4/CXCR6/XCR1	10
BP	GO:0072678	T cell migration	9/397	73/18870	2.18073e-05	0.000588441	0.000514528	CCR2/CORO1A/CXCL13/FUT7/GPR15/ITGAL/ITGB7/SPN/ZAP70	9
BP	GO:0046637	regulation of alpha-beta T cell differentiation	9/397	74/18870	2.43718e-05	0.00065234	0.0005704	BATF/CCL19/IFNG/IL2RG/IRF4/SASH3/TBX21/ZAP70/ZNF683	9
BP	GO:0036037	CD8-positive, alpha-beta T cell activation	6/397	29/18870	2.63209e-05	0.000698873	0.000611088	BCL2/CRTAM/EOMES/GPR18/TNFSF8/WDFY4	6
BP	GO:0002294	CD4-positive, alpha-beta T cell differentiation involved in immune response	9/397	75/18870	2.71879e-05	0.000708833	0.000619798	BATF/CCL19/IFNG/IRF4/LY9/MYB/SLAMF6/SPN/TBX21	9
BP	GO:0002707	negative regulation of lymphocyte mediated immunity	8/397	58/18870	2.73367e-05	0.000708833	0.000619798	CD96/CR2/FOXJ1/PTPRC/SLAMF1/SPN/SUSD4/TBX21	8
BP	GO:0061756	leukocyte adhesion to vascular endothelial cell	8/397	58/18870	2.73367e-05	0.000708833	0.000619798	CCR2/CHST4/FUT7/GP1BA/ITGB7/SELL/SPN/VCAM1	8
BP	GO:0018958	phenol-containing compound metabolic process	11/397	114/18870	2.87958e-05	0.000736919	0.000644356	BCL2/CRYM/CYP2E1/DUOX2/DUOXA2/GRIN2A/INSM1/KL/OCA2/SLC1A1/SULT1B1	11
BP	GO:0032735	positive regulation of interleukin-12 production	7/397	43/18870	2.90106e-05	0.000736919	0.000644356	CCL19/CCR7/CD40LG/IFNG/IRF8/LTB/SCIMP	7
BP	GO:0097305	response to alcohol	17/397	254/18870	2.9086e-05	0.000736919	0.000644356	CCL19/CCR5/CCR7/CD27/CLDN3/DYNAP/GRIN2A/HPGD/MAP4K1/NPPC/PENK/PRKCB/PTPRC/SCNN1B/SCNN1G/SLC2A4/VCAM1	17
BP	GO:0042267	natural killer cell mediated cytotoxicity	9/397	76/18870	3.02752e-05	0.000761237	0.000665619	CD2/CORO1A/CRTAM/KLRB1/NCR3/NKG7/RASGRP1/SH2D1A/SLAMF6	9
BP	GO:0006874	intracellular calcium ion homeostasis	19/397	308/18870	3.10181e-05	0.000772762	0.000675697	ATP13A4/ATP13A5/BCL2/CCL19/CCR2/CCR5/CCR7/CD19/CORO1A/FASLG/FATE1/GP1BA/KEL/LCK/NPPC/PRKCB/PTPRC/TSPOAP1/XCR1	19
BP	GO:0002685	regulation of leukocyte migration	16/397	230/18870	3.11992e-05	0.000772762	0.000675697	CCL19/CCR2/CCR7/CHST4/CORO1A/CXCL13/CXCL17/CXCR3/DEFB124/FUT7/GP1BA/GPR18/IL34/SLAMF1/SPN/STAP1	16
BP	GO:0002260	lymphocyte homeostasis	9/397	77/18870	3.36544e-05	0.000826914	0.000723047	BCL2/CORO1A/GAPT/GPR174/LGALS2/SASH3/SIT1/TNFRSF13B/TNFRSF17	9
BP	GO:0045582	positive regulation of T cell differentiation	11/397	116/18870	3.38838e-05	0.000826914	0.000723047	CCL19/CD27/IFNG/IL2RG/PTPRC/RASGRP1/RHOH/SASH3/TESPA1/VNN1/ZAP70	11
BP	GO:0001910	regulation of leukocyte mediated cytotoxicity	10/397	96/18870	3.42239e-05	0.000829117	0.000724973	CRTAM/DNASE1L3/KLRB1/NCR3/NOS2/PTPRC/RASGRP1/SH2D1A/SLAMF6/STAP1	10
BP	GO:0002819	regulation of adaptive immune response	15/397	208/18870	3.6308e-05	0.000873234	0.000763548	BATF/CCL19/CCR2/CD28/CR2/FCER2/FOXJ1/FUT7/LTA/PTPRC/SASH3/SLAMF1/SPN/SUSD4/TBX21	15
BP	GO:0002361	CD4-positive, CD25-positive, alpha-beta regulatory T cell differentiation	4/397	10/18870	3.66549e-05	0.000875234	0.000765297	FUT7/IFNG/IL2RG/PLA2G2D	4
BP	GO:2000514	regulation of CD4-positive, alpha-beta T cell activation	9/397	78/18870	3.73476e-05	0.000885404	0.00077419	BATF/CCL19/CD28/CD3E/IFNG/IL2RG/IRF4/SASH3/TBX21	9
BP	GO:0050856	regulation of T cell receptor signaling pathway	7/397	45/18870	3.94033e-05	0.00092186	0.000806067	CCR7/LCK/SH2D1A/SLA2/TESPA1/TRAT1/UBASH3A	7
BP	GO:0002237	response to molecule of bacterial origin	21/397	369/18870	3.94408e-05	0.00092186	0.000806067	CCR5/CCR7/CD6/CD96/CSF2RB/CXCL13/DEFB124/FASLG/HPGD/IL36A/IRF8/LTA/LTF/NOS2/NUGGC/PENK/SCIMP/STAP1/TIFAB/TLR10/VCAM1	21
BP	GO:1990868	response to chemokine	10/397	99/18870	4.47012e-05	0.0010303	0.000900887	CCL19/CCR2/CCR4/CCR5/CCR7/CXCL13/CXCR3/CXCR4/CXCR6/XCR1	10
BP	GO:1990869	cellular response to chemokine	10/397	99/18870	4.47012e-05	0.0010303	0.000900887	CCL19/CCR2/CCR4/CCR5/CCR7/CXCL13/CXCR3/CXCR4/CXCR6/XCR1	10
BP	GO:0002437	inflammatory response to antigenic stimulus	9/397	80/18870	4.57696e-05	0.00104765	0.000916057	CCR7/CD28/CD6/FUT7/IL36A/LTA/PLA2G2D/RASGRP1/SPN	9
BP	GO:0002712	regulation of B cell mediated immunity	8/397	64/18870	5.65605e-05	0.00127029	0.00111073	CD28/CR2/FCER2/FOXJ1/LTA/PTPRC/SUSD4/TBX21	8
BP	GO:0002889	regulation of immunoglobulin mediated immune response	8/397	64/18870	5.65605e-05	0.00127029	0.00111073	CD28/CR2/FCER2/FOXJ1/LTA/PTPRC/SUSD4/TBX21	8
BP	GO:0033089	positive regulation of T cell differentiation in thymus	4/397	11/18870	5.66444e-05	0.00127029	0.00111073	IL2RG/RASGRP1/TESPA1/VNN1	4
BP	GO:0036336	dendritic cell migration	6/397	33/18870	5.71591e-05	0.00127323	0.0011133	CCL19/CCR2/CCR5/CCR7/CXCR4/SLAMF1	6
BP	GO:0002286	T cell activation involved in immune response	11/397	123/18870	5.82714e-05	0.00128935	0.0011274	BATF/CCL19/EOMES/IFNG/IRF4/ITGAL/LY9/MYB/SLAMF6/SPN/TBX21	11
BP	GO:0050871	positive regulation of B cell activation	9/397	84/18870	6.74859e-05	0.00148335	0.00129703	BCL2/CD27/CD28/FCRL3/IL2RG/PTPRC/SASH3/TBX21/TNFRSF13C	9
BP	GO:0032743	positive regulation of interleukin-2 production	6/397	34/18870	6.8186e-05	0.00148888	0.00130186	CCR2/CD28/CD3E/IRF4/PTPRC/SASH3	6
BP	GO:0007204	positive regulation of cytosolic calcium ion concentration	13/397	173/18870	7.84672e-05	0.00170217	0.00148837	BCL2/CCR2/CCR4/CCR5/CCR7/CD52/CXCL13/CXCR3/CXCR4/CXCR6/ESR1/S1PR4/XCR1	13
BP	GO:0032760	positive regulation of tumor necrosis factor production	10/397	106/18870	8.02398e-05	0.00172933	0.00151211	C1QTNF4/CCL19/CCR2/CD2/IFNG/ORM2/PTPRC/RASGRP1/SASH3/SPN	10
BP	GO:0031349	positive regulation of defense response	24/397	480/18870	8.82576e-05	0.00188985	0.00165247	C2CD4B/CCR2/CCR7/CD28/CRTAM/ESR1/FCRL3/IFNG/IRF4/LGALS2/LILRA4/LTA/LTF/NCR3/NKG7/NLRC3/PENK/PYHIN1/RASGRP1/SCIMP/SH2D1A/SLAMF6/STAP1/TLR10	24
BP	GO:0045621	positive regulation of lymphocyte differentiation	11/397	130/18870	9.6404e-05	0.00205106	0.00179343	CCL19/CD27/IFNG/IL2RG/PTPRC/RASGRP1/RHOH/SASH3/TESPA1/VNN1/ZAP70	11
BP	GO:0001912	positive regulation of leukocyte mediated cytotoxicity	8/397	69/18870	9.75171e-05	0.00206152	0.00180258	CRTAM/NCR3/NOS2/PTPRC/RASGRP1/SH2D1A/SLAMF6/STAP1	8
BP	GO:0050855	regulation of B cell receptor signaling pathway	5/397	23/18870	9.89265e-05	0.00207808	0.00181706	CD19/CD22/FCRL3/PRKCB/STAP1	5
BP	GO:1903557	positive regulation of tumor necrosis factor superfamily cytokine production	10/397	110/18870	0.000109674	0.00228936	0.0020018	C1QTNF4/CCL19/CCR2/CD2/IFNG/ORM2/PTPRC/RASGRP1/SASH3/SPN	10
BP	GO:0002715	regulation of natural killer cell mediated immunity	7/397	53/18870	0.000115844	0.00238811	0.00208815	CD96/CRTAM/KLRB1/NCR3/RASGRP1/SH2D1A/SLAMF6	7
BP	GO:0007157	heterophilic cell-cell adhesion via plasma membrane cell adhesion molecules	7/397	53/18870	0.000115844	0.00238811	0.00208815	CD6/CEACAM5/CRB2/CRTAM/ITGAL/SELL/VCAM1	7
BP	GO:0097553	calcium ion transmembrane import into cytosol	14/397	205/18870	0.00011771	0.00241159	0.00210868	BCL2/CCL19/CCR5/CCR7/CD19/CORO1A/FASLG/GP1BA/GRIN2A/LCK/MS4A1/PTPRC/TRPV6/XCR1	14
BP	GO:1903238	positive regulation of leukocyte tethering or rolling	4/397	13/18870	0.000118693	0.00241683	0.00211326	CCR2/CHST4/FUT7/GP1BA	4
BP	GO:0048872	homeostasis of number of cells	18/397	316/18870	0.000137764	0.00278804	0.00243784	BCL2/CCR2/CCR4/CCR7/CORO1A/FLT3/GAPT/GPR174/IKZF1/LGALS2/MYB/NKX2-3/SASH3/SCNN1B/SIT1/ST6GALNAC1/TNFRSF13B/TNFRSF17	18
BP	GO:0042093	T-helper cell differentiation	8/397	73/18870	0.000145731	0.0028963	0.0025325	BATF/CCL19/IRF4/LY9/MYB/SLAMF6/SPN/TBX21	8
BP	GO:0045109	intermediate filament organization	8/397	73/18870	0.000145731	0.0028963	0.0025325	KRT13/KRT15/KRT24/KRT33B/KRT36/KRT4/KRT78/NEFH	8
BP	GO:0071677	positive regulation of mononuclear cell migration	8/397	73/18870	0.000145731	0.0028963	0.0025325	CCR2/CCR7/CORO1A/CXCL13/CXCL17/DEFB124/SLAMF1/SPN	8
BP	GO:0032496	response to lipopolysaccharide	19/397	348/18870	0.00015689	0.0030995	0.00271018	CCR5/CCR7/CD6/CD96/CSF2RB/CXCL13/FASLG/HPGD/IL36A/IRF8/LTA/LTF/NOS2/NUGGC/PENK/SCIMP/STAP1/TIFAB/VCAM1	19
BP	GO:0043370	regulation of CD4-positive, alpha-beta T cell differentiation	7/397	56/18870	0.00016512	0.00324281	0.00283548	BATF/CCL19/IFNG/IL2RG/IRF4/SASH3/TBX21	7
BP	GO:0002438	acute inflammatory response to antigenic stimulus	5/397	26/18870	0.000183604	0.00358461	0.00313435	CCR7/CD6/FUT7/PLA2G2D/SPN	5
BP	GO:0002274	myeloid leukocyte activation	15/397	241/18870	0.00018995	0.0036868	0.00322371	BATF/CCR2/CD177/CD2/DNASE1L3/FCER2/IFNG/IRF4/PTGDS/PTPRC/RASGRP1/RHOH/SCNN1B/SLAMF1/STAP1	15
BP	GO:0060326	cell chemotaxis	18/397	325/18870	0.000195036	0.00376351	0.00329078	CCL19/CCR2/CCR4/CCR5/CCR7/CORO1A/CXCL13/CXCL17/CXCR3/CXCR4/CXCR6/DEFB124/GPR18/IL34/SLAMF1/STAP1/VCAM1/XCR1	18
BP	GO:0002700	regulation of production of molecular mediator of immune response	13/397	191/18870	0.000211595	0.00404527	0.00353715	CCR2/CD22/CD28/CD40LG/CD96/FCRL3/MZB1/PTPRC/SASH3/SCIMP/SLAMF1/SPINK5/TBX21	13
BP	GO:0002637	regulation of immunoglobulin production	8/397	77/18870	0.000212075	0.00404527	0.00353715	CD22/CD28/CD40LG/FCRL3/MZB1/PTPRC/SASH3/TBX21	8
BP	GO:0043374	CD8-positive, alpha-beta T cell differentiation	4/397	15/18870	0.000219155	0.00415288	0.00363124	BCL2/EOMES/GPR18/TNFSF8	4
BP	GO:0032753	positive regulation of interleukin-4 production	5/397	27/18870	0.00022147	0.00415288	0.00363124	CD28/CD3E/CD40LG/IRF4/SASH3	5
BP	GO:0033081	regulation of T cell differentiation in thymus	5/397	27/18870	0.00022147	0.00415288	0.00363124	FOXJ1/IL2RG/RASGRP1/TESPA1/VNN1	5
BP	GO:0002823	negative regulation of adaptive immune response based on somatic recombination of immune receptors built from immunoglobulin superfamily domains	7/397	59/18870	0.000230118	0.0042908	0.00375184	CR2/FOXJ1/PTPRC/SLAMF1/SPN/SUSD4/TBX21	7
BP	GO:0030101	natural killer cell activation	9/397	99/18870	0.000240692	0.00446289	0.00390231	CD2/CORO1A/IL21R/NCR3/NKG7/PTPRC/RASGRP1/SLAMF1/ZNF683	9
BP	GO:0002864	regulation of acute inflammatory response to antigenic stimulus	4/397	16/18870	0.000287373	0.00529883	0.00463325	CCR7/FUT7/PLA2G2D/SPN	4
BP	GO:0046640	regulation of alpha-beta T cell proliferation	6/397	44/18870	0.000299778	0.00546683	0.00478015	CCR2/CD28/CD3E/PTPRC/RASAL3/ZAP70	6
BP	GO:2000516	positive regulation of CD4-positive, alpha-beta T cell activation	6/397	44/18870	0.000299778	0.00546683	0.00478015	CCL19/CD28/CD3E/IFNG/IL2RG/SASH3	6
BP	GO:0009312	oligosaccharide biosynthetic process	5/397	29/18870	0.00031472	0.00566296	0.00495165	B3GALT5/FUT3/FUT6/FUT7/ST6GALNAC1	5
BP	GO:0045954	positive regulation of natural killer cell mediated cytotoxicity	5/397	29/18870	0.00031472	0.00566296	0.00495165	CRTAM/NCR3/RASGRP1/SH2D1A/SLAMF6	5
BP	GO:0002520	immune system development	13/397	199/18870	0.000315652	0.00566296	0.00495165	BATF/BCL2/CCR4/CD28/CD3E/CD40LG/FOXJ1/LTA/LTB/NKX2-3/PDCD1/PTPRC/TBX21	13
BP	GO:0002687	positive regulation of leukocyte migration	11/397	149/18870	0.000320933	0.00572675	0.00500742	CCL19/CCR2/CCR7/CORO1A/CXCL13/CXCL17/DEFB124/FUT7/IL34/SLAMF1/SPN	11
BP	GO:0002688	regulation of leukocyte chemotaxis	10/397	126/18870	0.000334843	0.00594302	0.00519652	CCL19/CCR2/CCR7/CXCL13/CXCL17/DEFB124/GPR18/IL34/SLAMF1/STAP1	10
BP	GO:0032623	interleukin-2 production	7/397	63/18870	0.000347294	0.00609877	0.00533271	CCR2/CD28/CD3E/IRF4/PTPRC/SASH3/TBX21	7
BP	GO:0032663	regulation of interleukin-2 production	7/397	63/18870	0.000347294	0.00609877	0.00533271	CCR2/CD28/CD3E/IRF4/PTPRC/SASH3/TBX21	7
BP	GO:0002921	negative regulation of humoral immune response	4/397	17/18870	0.000369583	0.00642224	0.00561555	CR2/FOXJ1/SPINK5/SUSD4	4
BP	GO:0050862	positive regulation of T cell receptor signaling pathway	4/397	17/18870	0.000369583	0.00642224	0.00561555	CCR7/LCK/TESPA1/TRAT1	4
BP	GO:0002440	production of molecular mediator of immune response	17/397	314/18870	0.000379249	0.00655587	0.0057324	BATF/CCR2/CD22/CD28/CD40LG/CD96/FCRL3/GAPT/LGALS4/MZB1/PTPRC/SASH3/SCIMP/SLAMF1/SPINK5/TBX21/VPREB3	17
BP	GO:0002820	negative regulation of adaptive immune response	7/397	64/18870	0.000382998	0.00656895	0.00574384	CR2/FOXJ1/PTPRC/SLAMF1/SPN/SUSD4/TBX21	7
BP	GO:0097028	dendritic cell differentiation	6/397	46/18870	0.000383964	0.00656895	0.00574384	BATF/CCL19/CCR7/FLT3/IRF4/IRF8	6
BP	GO:0002456	T cell mediated immunity	10/397	129/18870	0.000404298	0.00688136	0.006017	CCR2/CD8A/CR2/FUT7/GZMM/PTPRC/SASH3/SLAMF1/SPN/TBX21	10
BP	GO:0002526	acute inflammatory response	9/397	107/18870	0.000430355	0.00724893	0.0063384	C2CD4B/CCR7/CD6/DNASE1L3/FUT7/ORM2/PLA2G2D/SPN/VNN1	9
BP	GO:0002701	negative regulation of production of molecular mediator of immune response	6/397	47/18870	0.000432446	0.00724893	0.0063384	CD22/CD96/FCRL3/SLAMF1/SPINK5/TBX21	6
BP	GO:0046633	alpha-beta T cell proliferation	6/397	47/18870	0.000432446	0.00724893	0.0063384	CCR2/CD28/CD3E/PTPRC/RASAL3/ZAP70	6
BP	GO:0001562	response to protozoan	5/397	31/18870	0.000435013	0.00725532	0.00634399	BATF/IRF4/IRF8/NKG7/SPN	5
BP	GO:0006957	complement activation, alternative pathway	4/397	18/18870	0.00046733	0.00771675	0.00674746	C7/C8G/CR2/SUSD4	4
BP	GO:1903236	regulation of leukocyte tethering or rolling	4/397	18/18870	0.00046733	0.00771675	0.00674746	CCR2/CHST4/FUT7/GP1BA	4
BP	GO:0002861	regulation of inflammatory response to antigenic stimulus	6/397	48/18870	0.000485573	0.0079783	0.00697615	CCR7/CD28/FUT7/LTA/PLA2G2D/SPN	6
BP	GO:0002673	regulation of acute inflammatory response	6/397	49/18870	0.000543645	0.00884489	0.0077339	C2CD4B/CCR7/DNASE1L3/FUT7/PLA2G2D/SPN	6
BP	GO:0042269	regulation of natural killer cell mediated cytotoxicity	6/397	49/18870	0.000543645	0.00884489	0.0077339	CRTAM/KLRB1/NCR3/RASGRP1/SH2D1A/SLAMF6	6
BP	GO:1902107	positive regulation of leukocyte differentiation	12/397	185/18870	0.000566736	0.00913105	0.00798411	CCL19/CD27/IFNG/IL2RG/IL34/PTPRC/RASGRP1/RHOH/SASH3/TESPA1/VNN1/ZAP70	12
BP	GO:1903708	positive regulation of hemopoiesis	12/397	185/18870	0.000566736	0.00913105	0.00798411	CCL19/CD27/IFNG/IL2RG/IL34/PTPRC/RASGRP1/RHOH/SASH3/TESPA1/VNN1/ZAP70	12
BP	GO:0002544	chronic inflammatory response	4/397	19/18870	0.00058218	0.00932242	0.00815145	CXCL13/LTA/VCAM1/VNN1	4
BP	GO:0050858	negative regulation of antigen receptor-mediated signaling pathway	5/397	33/18870	0.00058704	0.00932242	0.00815145	CD22/FCRL3/SH2D1A/SLA2/UBASH3A	5
BP	GO:0072539	T-helper 17 cell differentiation	5/397	33/18870	0.00058704	0.00932242	0.00815145	BATF/IRF4/LY9/SLAMF6/TBX21	5
BP	GO:0051209	release of sequestered calcium ion into cytosol	10/397	136/18870	0.000613956	0.00970343	0.00848459	CCL19/CCR5/CCR7/CD19/CORO1A/FASLG/GP1BA/LCK/PTPRC/XCR1	10
BP	GO:0051283	negative regulation of sequestering of calcium ion	10/397	137/18870	0.000650166	0.010227	0.00894242	CCL19/CCR5/CCR7/CD19/CORO1A/FASLG/GP1BA/LCK/PTPRC/XCR1	10
BP	GO:0002717	positive regulation of natural killer cell mediated immunity	5/397	34/18870	0.000676498	0.0105413	0.00921722	CRTAM/NCR3/RASGRP1/SH2D1A/SLAMF6	5
BP	GO:0035025	positive regulation of Rho protein signal transduction	5/397	34/18870	0.000676498	0.0105413	0.00921722	GPR174/GPR18/GPR55/P2RY10/P2RY8	5
BP	GO:0051282	regulation of sequestering of calcium ion	10/397	139/18870	0.000727887	0.0112891	0.00987105	CCL19/CCR5/CCR7/CD19/CORO1A/FASLG/GP1BA/LCK/PTPRC/XCR1	10
BP	GO:0032633	interleukin-4 production	5/397	35/18870	0.000775773	0.0119203	0.010423	CD28/CD3E/CD40LG/IRF4/SASH3	5
BP	GO:0032673	regulation of interleukin-4 production	5/397	35/18870	0.000775773	0.0119203	0.010423	CD28/CD3E/CD40LG/IRF4/SASH3	5
BP	GO:0045104	intermediate filament cytoskeleton organization	8/397	94/18870	0.000823489	0.0125952	0.0110131	KRT13/KRT15/KRT24/KRT33B/KRT36/KRT4/KRT78/NEFH	8
BP	GO:0043552	positive regulation of phosphatidylinositol 3-kinase activity	4/397	21/18870	0.000869553	0.0132388	0.0115759	CCL19/CCR7/CD19/FLT3	4
BP	GO:0045103	intermediate filament-based process	8/397	95/18870	0.000883041	0.0132884	0.0116193	KRT13/KRT15/KRT24/KRT33B/KRT36/KRT4/KRT78/NEFH	8
BP	GO:0001894	tissue homeostasis	15/397	279/18870	0.000884828	0.0132884	0.0116193	BCL2/CCR2/CLDN3/CORO1A/CRB2/GPR55/JCHAIN/LTF/MUC4/MUC6/SASH3/SLC1A1/TF/TFF3/TJP3	15
BP	GO:0060249	anatomical structure homeostasis	15/397	279/18870	0.000884828	0.0132884	0.0116193	BCL2/CCR2/CLDN3/CORO1A/CRB2/GPR55/JCHAIN/LTF/MUC4/MUC6/SASH3/SLC1A1/TF/TFF3/TJP3	15
BP	GO:0051208	sequestering of calcium ion	10/397	143/18870	0.000906367	0.0135506	0.0118485	CCL19/CCR5/CCR7/CD19/CORO1A/FASLG/GP1BA/LCK/PTPRC/XCR1	10
BP	GO:0002690	positive regulation of leukocyte chemotaxis	8/397	96/18870	0.000945998	0.0140797	0.0123111	CCL19/CCR2/CCR7/CXCL13/CXCL17/DEFB124/IL34/SLAMF1	8
BP	GO:0002883	regulation of hypersensitivity	3/397	10/18870	0.000993516	0.0147209	0.0128718	CCR7/FUT7/SPN	3
BP	GO:0050921	positive regulation of chemotaxis	10/397	145/18870	0.00100823	0.0148725	0.0130044	CCL19/CCR2/CCR4/CCR7/CXCL13/CXCL17/CXCR4/DEFB124/IL34/SLAMF1	10
BP	GO:0045471	response to ethanol	9/397	121/18870	0.00104889	0.0154038	0.0134689	CD27/CLDN3/GRIN2A/HPGD/NPPC/PENK/PRKCB/SLC2A4/VCAM1	9
BP	GO:0002275	myeloid cell activation involved in immune response	8/397	98/18870	0.00108269	0.0158302	0.0138417	CCR2/CD177/DNASE1L3/IFNG/PTGDS/RASGRP1/SCNN1B/SLAMF1	8
BP	GO:0002335	mature B cell differentiation	5/397	38/18870	0.00113916	0.0165828	0.0144999	CD19/IL2RG/IRF8/NKX2-3/POU2AF1	5
BP	GO:0002695	negative regulation of leukocyte activation	12/397	202/18870	0.00122225	0.0177146	0.0154895	BANK1/CCR2/CRTAM/FOXJ1/LAX1/PLA2G2D/PTPRC/SPN/TBC1D10C/TBX21/TIGIT/TNFRSF13B	12
BP	GO:0006816	calcium ion transport	20/397	445/18870	0.00126775	0.0182941	0.0159962	ANXA9/BCL2/CALHM1/CCL19/CCR5/CCR7/CD19/CORO1A/CXCR4/FASLG/FCRL3/GP1BA/GRIN2A/LCK/MS4A1/PRKCB/PTPRC/REM1/TRPV6/XCR1	20
BP	GO:0071675	regulation of mononuclear cell migration	9/397	125/18870	0.00131944	0.0189576	0.0165764	CCR2/CCR7/CORO1A/CXCL13/CXCL17/DEFB124/IL34/SLAMF1/SPN	9
BP	GO:0002924	negative regulation of humoral immune response mediated by circulating immunoglobulin	3/397	11/18870	0.00134484	0.0190437	0.0166517	CR2/FOXJ1/SUSD4	3
BP	GO:0048304	positive regulation of isotype switching to IgG isotypes	3/397	11/18870	0.00134484	0.0190437	0.0166517	CD28/PTPRC/TBX21	3
BP	GO:0051709	regulation of killing of cells of another organism	3/397	11/18870	0.00134484	0.0190437	0.0166517	FCER2/IFNG/NOS2	3
BP	GO:0070588	calcium ion transmembrane transport	17/397	352/18870	0.00134838	0.0190437	0.0166517	ANXA9/BCL2/CALHM1/CCL19/CCR5/CCR7/CD19/CORO1A/FASLG/GP1BA/GRIN2A/LCK/MS4A1/PTPRC/REM1/TRPV6/XCR1	17
BP	GO:0050777	negative regulation of immune response	12/397	205/18870	0.00138623	0.0194954	0.0170466	CCR2/CD96/CR2/FOXJ1/NLRC3/PDCD1/PTPRC/SLAMF1/SPINK5/SPN/SUSD4/TBX21	12
BP	GO:0046579	positive regulation of Ras protein signal transduction	6/397	59/18870	0.0014688	0.020398	0.0178359	GPR174/GPR18/GPR55/P2RY10/P2RY8/RASGRP1	6
BP	GO:2000107	negative regulation of leukocyte apoptotic process	6/397	59/18870	0.0014688	0.020398	0.0178359	BCL2/CCL19/CCR5/CCR7/CD27/PDCD1	6
BP	GO:0002922	positive regulation of humoral immune response	4/397	24/18870	0.00146886	0.020398	0.0178359	CCR7/FCER2/LTA/PTPRC	4
BP	GO:0008037	cell recognition	10/397	154/18870	0.00158938	0.0219798	0.0192189	CCL19/CCR7/CD5/CD6/CRTAM/CXCR4/FUT3/NCR3/SPACA4/TEX101	10
BP	GO:0002381	immunoglobulin production involved in immunoglobulin-mediated immune response	6/397	60/18870	0.00160357	0.022084	0.01931	BATF/CD28/CD40LG/GAPT/PTPRC/TBX21	6
BP	GO:0045066	regulatory T cell differentiation	5/397	41/18870	0.00161536	0.0221544	0.0193716	CD28/FUT7/IFNG/IL2RG/PLA2G2D	5
BP	GO:0001779	natural killer cell differentiation	4/397	25/18870	0.0017199	0.0233704	0.0204349	PTPRC/RASGRP1/SLAMF1/ZNF683	4
BP	GO:0010623	programmed cell death involved in cell development	4/397	25/18870	0.0017199	0.0233704	0.0204349	BCL2/DNASE1L3/FASLG/SYCP2	4
BP	GO:0071219	cellular response to molecule of bacterial origin	13/397	239/18870	0.00172514	0.0233704	0.0204349	CCR5/CD6/CXCL13/DEFB124/IL36A/IRF8/LTF/NOS2/NUGGC/SCIMP/STAP1/TIFAB/TLR10	13
BP	GO:0097048	dendritic cell apoptotic process	3/397	12/18870	0.00176527	0.0236325	0.020664	BCL2/CCL19/CCR7	3
BP	GO:2000668	regulation of dendritic cell apoptotic process	3/397	12/18870	0.00176527	0.0236325	0.020664	BCL2/CCL19/CCR7	3
BP	GO:0050727	regulation of inflammatory response	19/397	425/18870	0.00176585	0.0236325	0.020664	C2CD4B/CCR2/CCR7/CD28/CXCL17/DNASE1L3/DUOXA2/ESR1/FUT7/IFNG/LGALS2/LTA/NCF1/NKG7/NLRC3/PLA2G2D/PTPRC/SPN/STAP1	19
BP	GO:0030595	leukocyte chemotaxis	13/397	240/18870	0.00179011	0.0238609	0.0208638	CCL19/CCR2/CCR5/CCR7/CORO1A/CXCL13/CXCL17/CXCR4/DEFB124/GPR18/IL34/SLAMF1/STAP1	13
BP	GO:0032733	positive regulation of interleukin-10 production	5/397	42/18870	0.00180246	0.0239295	0.0209237	CD28/CD40LG/IRF4/SASH3/TIGIT	5
BP	GO:0031424	keratinization	7/397	83/18870	0.00182125	0.0240826	0.0210576	CNFN/KRT4/KRT78/LCE3A/LORICRIN/SPRR2F/SPRR3	7
BP	GO:0090218	positive regulation of lipid kinase activity	4/397	26/18870	0.00199922	0.0260958	0.022818	CCL19/CCR7/CD19/FLT3	4
BP	GO:1904996	positive regulation of leukocyte adhesion to vascular endothelial cell	4/397	26/18870	0.00199922	0.0260958	0.022818	CCR2/CHST4/FUT7/GP1BA	4
BP	GO:0002714	positive regulation of B cell mediated immunity	5/397	43/18870	0.00200495	0.0260958	0.022818	CD28/FCER2/LTA/PTPRC/TBX21	5
BP	GO:0002891	positive regulation of immunoglobulin mediated immune response	5/397	43/18870	0.00200495	0.0260958	0.022818	CD28/FCER2/LTA/PTPRC/TBX21	5
BP	GO:0002863	positive regulation of inflammatory response to antigenic stimulus	3/397	13/18870	0.00225925	0.0291768	0.0255119	CCR7/CD28/LTA	3
BP	GO:0042362	fat-soluble vitamin biosynthetic process	3/397	13/18870	0.00225925	0.0291768	0.0255119	BCO1/CYP27A1/IFNG	3
BP	GO:0030890	positive regulation of B cell proliferation	5/397	45/18870	0.00245903	0.0315117	0.0275535	BCL2/FCRL3/PTPRC/SASH3/TNFRSF13C	5
BP	GO:1905521	regulation of macrophage migration	5/397	45/18870	0.00245903	0.0315117	0.0275535	CCR2/CXCL17/IL34/SLAMF1/STAP1	5
BP	GO:0010758	regulation of macrophage chemotaxis	4/397	28/18870	0.00264896	0.0336855	0.0294543	CXCL17/IL34/SLAMF1/STAP1	4
BP	GO:0042832	defense response to protozoan	4/397	28/18870	0.00264896	0.0336855	0.0294543	BATF/IRF4/IRF8/NKG7	4
BP	GO:0050866	negative regulation of cell activation	12/397	223/18870	0.00279589	0.0354181	0.0309693	BANK1/CCR2/CRTAM/FOXJ1/LAX1/PLA2G2D/PTPRC/SPN/TBC1D10C/TBX21/TIGIT/TNFRSF13B	12
BP	GO:0051057	positive regulation of small GTPase mediated signal transduction	6/397	67/18870	0.0028271	0.0355892	0.0311189	GPR174/GPR18/GPR55/P2RY10/P2RY8/RASGRP1	6
BP	GO:0002524	hypersensitivity	3/397	14/18870	0.00283084	0.0355892	0.0311189	CCR7/FUT7/SPN	3
BP	GO:0043029	T cell homeostasis	5/397	47/18870	0.00298347	0.0371537	0.0324869	BCL2/CORO1A/GPR174/LGALS2/SIT1	5
BP	GO:0072538	T-helper 17 type immune response	5/397	47/18870	0.00298347	0.0371537	0.0324869	BATF/IRF4/LY9/SLAMF6/TBX21	5
BP	GO:0002377	immunoglobulin production	11/397	196/18870	0.00300072	0.0371537	0.0324869	BATF/CD22/CD28/CD40LG/FCRL3/GAPT/MZB1/PTPRC/SASH3/TBX21/VPREB3	11
BP	GO:0001773	myeloid dendritic cell activation	4/397	29/18870	0.00302244	0.0371537	0.0324869	BATF/CD2/IRF4/SLAMF1	4
BP	GO:0002710	negative regulation of T cell mediated immunity	4/397	29/18870	0.00302244	0.0371537	0.0324869	PTPRC/SLAMF1/SPN/TBX21	4
BP	GO:0042403	thyroid hormone metabolic process	4/397	29/18870	0.00302244	0.0371537	0.0324869	CRYM/DUOX2/DUOXA2/SULT1B1	4
BP	GO:0045165	cell fate commitment	14/397	286/18870	0.00308527	0.037786	0.0330398	BATF/BCL2/DMRTA2/EOMES/EYA2/FOXA1/IRF4/LY9/PITX1/SLAMF6/SOX8/SPN/TBX21/TLX3	14
BP	GO:0051250	negative regulation of lymphocyte activation	10/397	169/18870	0.00313875	0.0382997	0.0334889	BANK1/CRTAM/FOXJ1/LAX1/PLA2G2D/SPN/TBC1D10C/TBX21/TIGIT/TNFRSF13B	10
BP	GO:0042088	T-helper 1 type immune response	5/397	48/18870	0.00327393	0.0398028	0.0348032	CCL19/CCR2/SLAMF1/SPN/TBX21	5
BP	GO:0002507	tolerance induction	4/397	30/18870	0.00343033	0.041552	0.0363327	CCR4/CD3E/FOXJ1/PDCD1	4
BP	GO:2000106	regulation of leukocyte apoptotic process	7/397	93/18870	0.00347703	0.041592	0.0363677	BCL2/CCL19/CCR5/CCR7/CD27/CD3G/PDCD1	7
BP	GO:0001768	establishment of T cell polarity	3/397	15/18870	0.00348376	0.041592	0.0363677	CCL19/CCR7/CRTAM	3
BP	GO:0001771	immunological synapse formation	3/397	15/18870	0.00348376	0.041592	0.0363677	CCL19/CCR7/CD6	3
BP	GO:0048302	regulation of isotype switching to IgG isotypes	3/397	15/18870	0.00348376	0.041592	0.0363677	CD28/PTPRC/TBX21	3
BP	GO:0009308	amine metabolic process	8/397	119/18870	0.00369127	0.0439116	0.0383959	CHDH/GDPD3/GRIN2A/INSM1/KL/SLC1A1/SULT1B1/VCAM1	8
BP	GO:0050920	regulation of chemotaxis	12/397	232/18870	0.00384781	0.0456103	0.0398812	CCL19/CCR2/CCR4/CCR7/CXCL13/CXCL17/CXCR4/DEFB124/GPR18/IL34/SLAMF1/STAP1	12
BP	GO:0002825	regulation of T-helper 1 type immune response	4/397	31/18870	0.00387408	0.0457582	0.0400106	CCL19/CCR2/SLAMF1/TBX21	4
BP	GO:0009988	cell-cell recognition	6/397	72/18870	0.00405528	0.0477286	0.0417335	CCL19/CCR7/CD6/FUT3/SPACA4/TEX101	6
BP	GO:0045088	regulation of innate immune response	18/397	425/18870	0.00408178	0.0477403	0.0417438	CD96/CRTAM/ESR1/FCRL3/IRF4/KLRB1/LILRA4/LTF/NCF1/NCR3/NLRC3/PYHIN1/RASGRP1/SCIMP/SH2D1A/SLAMF6/SUSD4/TLR10	18
BP	GO:0071887	leukocyte apoptotic process	8/397	121/18870	0.00408504	0.0477403	0.0417438	BCL2/CCL19/CCR5/CCR7/CD27/CD3G/FASLG/PDCD1	8
BP	GO:0071216	cellular response to biotic stimulus	13/397	265/18870	0.00419927	0.0484802	0.0423906	CCR5/CD6/CXCL13/DEFB124/IL36A/IRF8/LTF/NOS2/NUGGC/SCIMP/STAP1/TIFAB/TLR10	13
BP	GO:0001767	establishment of lymphocyte polarity	3/397	16/18870	0.00422138	0.0484802	0.0423906	CCL19/CCR7/CRTAM	3
BP	GO:0002713	negative regulation of B cell mediated immunity	3/397	16/18870	0.00422138	0.0484802	0.0423906	CR2/FOXJ1/SUSD4	3
BP	GO:0002890	negative regulation of immunoglobulin mediated immune response	3/397	16/18870	0.00422138	0.0484802	0.0423906	CR2/FOXJ1/SUSD4	3
BP	GO:0048291	isotype switching to IgG isotypes	3/397	16/18870	0.00422138	0.0484802	0.0423906	CD28/PTPRC/TBX21	3
BP	GO:0032635	interleukin-6 production	10/397	177/18870	0.00435792	0.0497042	0.043461	BANK1/C1QTNF4/FOXJ1/IFNG/IL36A/NLRC3/NOS2/POU2AF1/SCIMP/SLAMF1	10
BP	GO:0032675	regulation of interleukin-6 production	10/397	177/18870	0.00435792	0.0497042	0.043461	BANK1/C1QTNF4/FOXJ1/IFNG/IL36A/NLRC3/NOS2/POU2AF1/SCIMP/SLAMF1	10
BP	GO:0042742	defense response to bacterium	15/397	330/18870	0.00445842	0.0506763	0.044311	CXCL13/DEFB124/IRF8/JCHAIN/LCE3A/LGALS4/LTA/LTF/NOS2/PLAC8/SCNN1B/SPINK5/SPN/TF/TNFSF8	15
BP	GO:0006909	phagocytosis	12/397	237/18870	0.00455732	0.0514207	0.0449618	CCR2/CORO1A/ICAM3/IFNG/IL2RG/IRF8/ITGAL/PTPRC/SIRPG/SLAMF1/STAP1/TIMD4	12
BP	GO:0051651	maintenance of location in cell	12/397	237/18870	0.00455732	0.0514207	0.0449618	CCL19/CCR5/CCR7/CD19/CORO1A/FASLG/GP1BA/LCK/PTPRC/TMSB15A/TMSB4Y/XCR1	12
BP	GO:0009101	glycoprotein biosynthetic process	14/397	299/18870	0.00457039	0.0514207	0.0449618	B3GALT5/BCL2/CCL19/CCR7/CHST4/DERL3/FUT3/FUT6/FUT7/GAL3ST2/HS3ST4/HS3ST6/MGAT3/ST6GALNAC1	14
BP	GO:0046638	positive regulation of alpha-beta T cell differentiation	5/397	52/18870	0.00464115	0.0520405	0.0455037	CCL19/IFNG/IL2RG/SASH3/ZAP70	5
BP	GO:0002824	positive regulation of adaptive immune response based on somatic recombination of immune receptors built from immunoglobulin superfamily domains	8/397	124/18870	0.0047355	0.0529196	0.0462724	CCR2/CD28/FCER2/LTA/PTPRC/SASH3/SLAMF1/TBX21	8
BP	GO:0045577	regulation of B cell differentiation	4/397	33/18870	0.00487486	0.0541126	0.0473156	CD27/FCRL3/IKZF3/IL2RG	4
BP	GO:0050869	negative regulation of B cell activation	4/397	33/18870	0.00487486	0.0541126	0.0473156	BANK1/FOXJ1/TBC1D10C/TNFRSF13B	4
BP	GO:0002709	regulation of T cell mediated immunity	7/397	99/18870	0.00491106	0.0543327	0.047508	CCR2/FUT7/PTPRC/SASH3/SLAMF1/SPN/TBX21	7
BP	GO:0050729	positive regulation of inflammatory response	9/397	152/18870	0.0049446	0.054522	0.0476736	C2CD4B/CCR2/CCR7/CD28/IFNG/LGALS2/LTA/NKG7/STAP1	9
BP	GO:0071622	regulation of granulocyte chemotaxis	5/397	53/18870	0.00503796	0.0551997	0.0482661	CCL19/CCR7/CXCL17/IL34/SLAMF1	5
BP	GO:0036065	fucosylation	3/397	17/18870	0.00504677	0.0551997	0.0482661	FUT3/FUT6/FUT7	3
BP	GO:0006935	chemotaxis	19/397	468/18870	0.00505595	0.0551997	0.0482661	CCL19/CCR2/CCR4/CCR5/CCR7/CORO1A/CXCL13/CXCL17/CXCR3/CXCR4/CXCR6/DEFB124/GPR18/IL34/SLAMF1/SPN/STAP1/VCAM1/XCR1	19
BP	GO:0042330	taxis	19/397	470/18870	0.00528692	0.0575321	0.0503056	CCL19/CCR2/CCR4/CCR5/CCR7/CORO1A/CXCL13/CXCL17/CXCR3/CXCR4/CXCR6/DEFB124/GPR18/IL34/SLAMF1/SPN/STAP1/VCAM1/XCR1	19
BP	GO:0001782	B cell homeostasis	4/397	34/18870	0.00543464	0.0587543	0.0513743	BCL2/GAPT/SASH3/TNFRSF13B	4
BP	GO:0043372	positive regulation of CD4-positive, alpha-beta T cell differentiation	4/397	34/18870	0.00543464	0.0587543	0.0513743	CCL19/IFNG/IL2RG/SASH3	4
BP	GO:0002639	positive regulation of immunoglobulin production	5/397	54/18870	0.00545823	0.0588178	0.0514297	CD28/MZB1/PTPRC/SASH3/TBX21	5
BP	GO:0002204	somatic recombination of immunoglobulin genes involved in immune response	5/397	55/18870	0.00590266	0.0629934	0.0550809	BATF/CD28/CD40LG/PTPRC/TBX21	5
BP	GO:0002208	somatic diversification of immunoglobulins involved in immune response	5/397	55/18870	0.00590266	0.0629934	0.0550809	BATF/CD28/CD40LG/PTPRC/TBX21	5
BP	GO:0045190	isotype switching	5/397	55/18870	0.00590266	0.0629934	0.0550809	BATF/CD28/CD40LG/PTPRC/TBX21	5
BP	GO:0002827	positive regulation of T-helper 1 type immune response	3/397	18/18870	0.00596266	0.0630256	0.0551091	CCR2/SLAMF1/TBX21	3
BP	GO:0048535	lymph node development	3/397	18/18870	0.00596266	0.0630256	0.0551091	LTA/LTB/NKX2-3	3
BP	GO:1904044	response to aldosterone	3/397	18/18870	0.00596266	0.0630256	0.0551091	PTPRC/SCNN1B/SCNN1G	3
BP	GO:0048873	homeostasis of number of cells within a tissue	4/397	35/18870	0.00603579	0.0631949	0.0552571	BCL2/CCR2/CORO1A/SASH3	4
BP	GO:0070633	transepithelial transport	4/397	35/18870	0.00603579	0.0631949	0.0552571	CLDN3/RHCG/SCNN1B/SLC1A1	4
BP	GO:2000406	positive regulation of T cell migration	4/397	35/18870	0.00603579	0.0631949	0.0552571	CCR2/CORO1A/CXCL13/SPN	4
BP	GO:0002821	positive regulation of adaptive immune response	8/397	130/18870	0.00627194	0.0654609	0.0572384	CCR2/CD28/FCER2/LTA/PTPRC/SASH3/SLAMF1/TBX21	8
BP	GO:0010720	positive regulation of cell development	18/397	444/18870	0.00635865	0.0660893	0.0577879	BCL2/CCL19/CD27/CXCR4/DMRTA2/IFNG/IL2RG/IL34/LTA/MYB/PTPRC/RASGRP1/RHOH/SASH3/SOX8/TESPA1/VNN1/ZAP70	18
BP	GO:0038093	Fc receptor signaling pathway	5/397	56/18870	0.00637197	0.0660893	0.0577879	CD247/FCER2/LCK/LILRA4/PTPRC	5
BP	GO:0002283	neutrophil activation involved in immune response	3/397	19/18870	0.00697149	0.0714148	0.0624445	CD177/DNASE1L3/SCNN1B	3
BP	GO:0010759	positive regulation of macrophage chemotaxis	3/397	19/18870	0.00697149	0.0714148	0.0624445	CXCL17/IL34/SLAMF1	3
BP	GO:0032695	negative regulation of interleukin-12 production	3/397	19/18870	0.00697149	0.0714148	0.0624445	CCR7/SLAMF1/TIGIT	3
BP	GO:0035821	modulation of process of another organism	3/397	19/18870	0.00697149	0.0714148	0.0624445	FCER2/IFNG/NOS2	3
BP	GO:0002244	hematopoietic progenitor cell differentiation	8/397	133/18870	0.00716918	0.0732138	0.0640175	BATF/BCL2/FLT3/MYB/PTPRC/SERPINB12/TIFAB/TNFRSF13B	8
BP	GO:0043299	leukocyte degranulation	6/397	81/18870	0.00719975	0.0733006	0.0640934	CCR2/CD177/CORO1A/NKG7/PTGDS/RASGRP1	6
BP	GO:0010863	positive regulation of phospholipase C activity	4/397	37/18870	0.00736722	0.0747762	0.0653836	ESR1/GPR55/ITK/S1PR4	4
BP	GO:0002643	regulation of tolerance induction	3/397	20/18870	0.00807545	0.0809749	0.0708038	CD3E/FOXJ1/PDCD1	3
BP	GO:0035023	regulation of Rho protein signal transduction	6/397	83/18870	0.00808708	0.0809749	0.0708038	GPR174/GPR18/GPR55/P2RY10/P2RY8/TAGAP	6
BP	GO:0050848	regulation of calcium-mediated signaling	6/397	83/18870	0.00808708	0.0809749	0.0708038	CD22/CD3E/SLA2/TBC1D10C/TRAT1/ZAP70	6
BP	GO:0002369	T cell cytokine production	4/397	38/18870	0.00809993	0.0809749	0.0708038	CCR2/SASH3/SLAMF1/TBX21	4
BP	GO:0002724	regulation of T cell cytokine production	4/397	38/18870	0.00809993	0.0809749	0.0708038	CCR2/SASH3/SLAMF1/TBX21	4
BP	GO:0060193	positive regulation of lipase activity	5/397	60/18870	0.00851173	0.0848361	0.07418	ESR1/GPR55/ITK/PLIN5/S1PR4	5
BP	GO:0071222	cellular response to lipopolysaccharide	11/397	226/18870	0.00859086	0.0853685	0.0746455	CCR5/CD6/CXCL13/IL36A/IRF8/LTF/NOS2/NUGGC/SCIMP/STAP1/TIFAB	11
BP	GO:0002444	myeloid leukocyte mediated immunity	7/397	110/18870	0.00863823	0.0855829	0.074833	CCR2/CD177/DNASE1L3/PTGDS/RASGRP1/SCNN1B/STAP1	7
BP	GO:0043550	regulation of lipid kinase activity	4/397	39/18870	0.00887885	0.0874448	0.076461	CCL19/CCR7/CD19/FLT3	4
BP	GO:1900274	regulation of phospholipase C activity	4/397	39/18870	0.00887885	0.0874448	0.076461	ESR1/GPR55/ITK/S1PR4	4
BP	GO:0034113	heterotypic cell-cell adhesion	5/397	61/18870	0.00911567	0.0892476	0.0780373	CD2/ITGB7/LCK/PTPRC/VCAM1	5
BP	GO:1905517	macrophage migration	5/397	61/18870	0.00911567	0.0892476	0.0780373	CCR2/CXCL17/IL34/SLAMF1/STAP1	5
BP	GO:0050849	negative regulation of calcium-mediated signaling	3/397	21/18870	0.00927644	0.0900248	0.078717	CD22/SLA2/TBC1D10C	3
BP	GO:0090026	positive regulation of monocyte chemotaxis	3/397	21/18870	0.00927644	0.0900248	0.078717	CCR2/CXCL17/DEFB124	3
BP	GO:1903429	regulation of cell maturation	3/397	21/18870	0.00927644	0.0900248	0.078717	BCL2/NPPC/TCP11	3
BP	GO:0097191	extrinsic apoptotic signaling pathway	11/397	229/18870	0.00942998	0.0912481	0.0797866	BCL2/BCL2L14/CD27/EYA2/FASLG/IFNG/IL19/LTB/MAL/PTPRC/TMC8	11
BP	GO:0071902	positive regulation of protein serine/threonine kinase activity	8/397	140/18870	0.00963673	0.0929777	0.0812989	CCL19/FLT3/IFNG/IL34/LTF/RASGRP1/TCIM/TCL1A	8
BP	GO:0007200	phospholipase C-activating G protein-coupled receptor signaling pathway	7/397	113/18870	0.00994227	0.0956475	0.0836334	ESR1/GPR174/GPR18/GPR55/P2RY10/P2RY8/PRKCB	7
BP	GO:0016447	somatic recombination of immunoglobulin gene segments	5/397	63/18870	0.0104109	0.0998667	0.0873226	BATF/CD28/CD40LG/PTPRC/TBX21	5
BP	GO:0002691	regulation of cellular extravasation	4/397	41/18870	0.0105796	0.100613	0.0879748	CCR2/CHST4/FUT7/GP1BA	4
BP	GO:0048246	macrophage chemotaxis	4/397	41/18870	0.0105796	0.100613	0.0879748	CXCL17/IL34/SLAMF1/STAP1	4
BP	GO:1904994	regulation of leukocyte adhesion to vascular endothelial cell	4/397	41/18870	0.0105796	0.100613	0.0879748	CCR2/CHST4/FUT7/GP1BA	4
BP	GO:0046330	positive regulation of JNK cascade	6/397	88/18870	0.0106453	0.10066	0.0880163	CCL19/CCR7/CD27/NCF1/RASGRP1/SLAMF1	6
BP	GO:0098586	cellular response to virus	6/397	88/18870	0.0106453	0.10066	0.0880163	CCL19/IFNG/PENK/POU2AF1/VWCE/WDFY4	6
BP	GO:0006958	complement activation, classical pathway	4/397	42/18870	0.0115035	0.107854	0.0943065	C7/C8G/CR2/SUSD4	4
BP	GO:0042092	type 2 immune response	4/397	42/18870	0.0115035	0.107854	0.0943065	BATF/CCR2/MYB/TBX21	4
BP	GO:2000403	positive regulation of lymphocyte migration	4/397	42/18870	0.0115035	0.107854	0.0943065	CCR2/CORO1A/CXCL13/SPN	4
BP	GO:0032613	interleukin-10 production	5/397	65/18870	0.0118268	0.110262	0.0964122	CD28/CD40LG/IRF4/SASH3/TIGIT	5
BP	GO:0032653	regulation of interleukin-10 production	5/397	65/18870	0.0118268	0.110262	0.0964122	CD28/CD40LG/IRF4/SASH3/TIGIT	5
BP	GO:0007130	synaptonemal complex assembly	3/397	23/18870	0.0119758	0.110718	0.0968109	STAG3/SYCE2/SYCP2	3
BP	GO:0045063	T-helper 1 cell differentiation	3/397	23/18870	0.0119758	0.110718	0.0968109	CCL19/SPN/TBX21	3
BP	GO:0097164	ammonium ion metabolic process	3/397	23/18870	0.0119758	0.110718	0.0968109	CHDH/ENPP6/GRIN2A	3
BP	GO:0009100	glycoprotein metabolic process	15/397	370/18870	0.0121389	0.111914	0.0978568	B3GALT5/BCL2/CCL19/CCR7/CHST4/DERL3/FUT3/FUT6/FUT7/GAL3ST2/HS3ST4/HS3ST6/MGAT3/NCCRP1/ST6GALNAC1	15
BP	GO:0045622	regulation of T-helper cell differentiation	4/397	43/18870	0.0124778	0.114719	0.10031	BATF/CCL19/IRF4/TBX21	4
BP	GO:0030216	keratinocyte differentiation	9/397	177/18870	0.0128134	0.11748	0.102723	ACER1/CNFN/KRT36/KRT4/KRT78/LCE3A/LORICRIN/SPRR2F/SPRR3	9
BP	GO:0002320	lymphoid progenitor cell differentiation	3/397	24/18870	0.0134768	0.122547	0.107154	BATF/BCL2/FLT3	3
BP	GO:0030277	maintenance of gastrointestinal epithelium	3/397	24/18870	0.0134768	0.122547	0.107154	MUC4/MUC6/TFF3	3
BP	GO:0031338	regulation of vesicle fusion	3/397	24/18870	0.0134768	0.122547	0.107154	CORO1A/DOC2B/SLAMF1	3
BP	GO:0097529	myeloid leukocyte migration	11/397	242/18870	0.0138181	0.125306	0.109567	CCL19/CCR2/CCR7/CD177/CXCL13/CXCL17/DEFB124/FUT7/IL34/SLAMF1/STAP1	11
BP	GO:0016445	somatic diversification of immunoglobulins	5/397	68/18870	0.0141874	0.128305	0.112189	BATF/CD28/CD40LG/PTPRC/TBX21	5
BP	GO:0045089	positive regulation of innate immune response	14/397	343/18870	0.0143013	0.128983	0.112782	CRTAM/ESR1/FCRL3/IRF4/LILRA4/LTF/NCR3/NLRC3/PYHIN1/RASGRP1/SCIMP/SH2D1A/SLAMF6/TLR10	14
BP	GO:0006775	fat-soluble vitamin metabolic process	4/397	45/18870	0.0145807	0.131147	0.114674	BCO1/CYP27A1/CYP4F12/IFNG	4
BP	GO:0032874	positive regulation of stress-activated MAPK cascade	7/397	122/18870	0.0147133	0.131982	0.115404	CCL19/CCR7/CD27/NCF1/RASGRP1/SCIMP/SLAMF1	7
BP	GO:1901224	positive regulation of non-canonical NF-kappaB signal transduction	5/397	69/18870	0.0150396	0.133825	0.117016	C1QTNF4/CCL19/CD27/NR3C2/TCIM	5
BP	GO:0009110	vitamin biosynthetic process	3/397	25/18870	0.01508	0.133825	0.117016	BCO1/CYP27A1/IFNG	3
BP	GO:0050860	negative regulation of T cell receptor signaling pathway	3/397	25/18870	0.01508	0.133825	0.117016	SH2D1A/SLA2/UBASH3A	3
BP	GO:0061339	establishment or maintenance of monopolar cell polarity	3/397	25/18870	0.01508	0.133825	0.117016	CARMIL2/FOXJ1/SYNE4	3
BP	GO:0009311	oligosaccharide metabolic process	5/397	70/18870	0.0159254	0.140532	0.12288	B3GALT5/FUT3/FUT6/FUT7/ST6GALNAC1	5
BP	GO:0019731	antibacterial humoral response	5/397	70/18870	0.0159254	0.140532	0.12288	JCHAIN/LGALS4/LTF/SPINK5/TF	5
BP	GO:0070304	positive regulation of stress-activated protein kinase signaling cascade	7/397	124/18870	0.0159628	0.140532	0.12288	CCL19/CCR7/CD27/NCF1/RASGRP1/SCIMP/SLAMF1	7
BP	GO:0045860	positive regulation of protein kinase activity	12/397	282/18870	0.016722	0.145466	0.127194	CCL19/CCR7/DYNAP/FLT3/IFNG/IL34/LTF/NCF1/PTPRC/RASGRP1/TCIM/TCL1A	12
BP	GO:0051235	maintenance of location	14/397	350/18870	0.0167507	0.145466	0.127194	CCL19/CCR5/CCR7/CD19/CORO1A/FASLG/GP1BA/LCK/PLIN5/PTPRC/SMIM22/TMSB15A/TMSB4Y/XCR1	14
BP	GO:0002726	positive regulation of T cell cytokine production	3/397	26/18870	0.0167862	0.145466	0.127194	SASH3/SLAMF1/TBX21	3
BP	GO:0031579	membrane raft organization	3/397	26/18870	0.0167862	0.145466	0.127194	CD2/MAL/PTPRC	3
BP	GO:0070193	synaptonemal complex organization	3/397	26/18870	0.0167862	0.145466	0.127194	STAG3/SYCE2/SYCP2	3
BP	GO:1905523	positive regulation of macrophage migration	3/397	26/18870	0.0167862	0.145466	0.127194	CXCL17/IL34/SLAMF1	3
BP	GO:0043588	skin development	13/397	317/18870	0.0172463	0.148063	0.129465	ACER1/BCL2/CNFN/CYSRT1/KRT36/KRT4/KRT78/LCE3A/LORICRIN/LTB/SPINK5/SPRR2F/SPRR3	13
BP	GO:0006575	cellular modified amino acid metabolic process	7/397	126/18870	0.0172857	0.148063	0.129465	CHDH/CRYM/DUOX2/DUOXA2/SULT1B1/VNN1/VNN2	7
BP	GO:0046718	viral entry into host cell	8/397	156/18870	0.0175803	0.148063	0.129465	CCR5/CIITA/CR2/CXCR4/GPR15/ITGB7/SLAMF1/TMPRSS2	8
BP	GO:0097530	granulocyte migration	8/397	156/18870	0.0175803	0.148063	0.129465	CCL19/CCR7/CD177/CXCL13/CXCL17/FUT7/IL34/SLAMF1	8
BP	GO:0002420	natural killer cell mediated cytotoxicity directed against tumor cell target	2/397	10/18870	0.0177683	0.148063	0.129465	CRTAM/NKG7	2
BP	GO:0042368	vitamin D biosynthetic process	2/397	10/18870	0.0177683	0.148063	0.129465	CYP27A1/IFNG	2
BP	GO:0050861	positive regulation of B cell receptor signaling pathway	2/397	10/18870	0.0177683	0.148063	0.129465	PRKCB/STAP1	2
BP	GO:0060525	prostate glandular acinus development	2/397	10/18870	0.0177683	0.148063	0.129465	ESR1/FOXA1	2
BP	GO:0070862	negative regulation of protein exit from endoplasmic reticulum	2/397	10/18870	0.0177683	0.148063	0.129465	DERL3/SVIP	2
BP	GO:2000510	positive regulation of dendritic cell chemotaxis	2/397	10/18870	0.0177683	0.148063	0.129465	CCR7/SLAMF1	2
BP	GO:2000563	positive regulation of CD4-positive, alpha-beta T cell proliferation	2/397	10/18870	0.0177683	0.148063	0.129465	CD28/CD3E	2
BP	GO:0002562	somatic diversification of immune receptors via germline recombination within a single locus	5/397	72/18870	0.0177997	0.148063	0.129465	BATF/CD28/CD40LG/PTPRC/TBX21	5
BP	GO:0006801	superoxide metabolic process	5/397	72/18870	0.0177997	0.148063	0.129465	CD177/DUOX2/NCF1/NOS2/SLC1A1	5
BP	GO:0014015	positive regulation of gliogenesis	5/397	72/18870	0.0177997	0.148063	0.129465	CXCR4/IL34/LTA/MYB/SOX8	5
BP	GO:0016444	somatic cell DNA recombination	5/397	72/18870	0.0177997	0.148063	0.129465	BATF/CD28/CD40LG/PTPRC/TBX21	5
BP	GO:0050766	positive regulation of phagocytosis	5/397	72/18870	0.0177997	0.148063	0.129465	IFNG/IL2RG/PTPRC/SIRPG/STAP1	5
BP	GO:0006576	biogenic amine metabolic process	6/397	99/18870	0.0181955	0.150977	0.132013	GDPD3/GRIN2A/INSM1/KL/SLC1A1/SULT1B1	6
BP	GO:2001236	regulation of extrinsic apoptotic signaling pathway	8/397	158/18870	0.0188296	0.155849	0.136273	BCL2/BCL2L14/EYA2/IL19/LTB/MAL/PTPRC/TMC8	8
BP	GO:0010518	positive regulation of phospholipase activity	4/397	49/18870	0.0194265	0.159595	0.139549	ESR1/GPR55/ITK/S1PR4	4
BP	GO:0036230	granulocyte activation	4/397	49/18870	0.0194265	0.159595	0.139549	CCR2/CD177/DNASE1L3/SCNN1B	4
BP	GO:2000404	regulation of T cell migration	4/397	49/18870	0.0194265	0.159595	0.139549	CCR2/CORO1A/CXCL13/SPN	4
BP	GO:0032755	positive regulation of interleukin-6 production	6/397	101/18870	0.0198815	0.16293	0.142465	C1QTNF4/IFNG/IL36A/NOS2/POU2AF1/SCIMP	6
BP	GO:0030099	myeloid cell differentiation	16/397	430/18870	0.0203975	0.166747	0.145802	BATF/CCL19/CCR7/GP1BA/GPR171/GPR55/IFNG/IKZF1/IL34/IRF4/IRF8/LTF/MYB/NKX2-3/TF/TIFAB	16
BP	GO:0007202	activation of phospholipase C activity	3/397	28/18870	0.0205096	0.166842	0.145885	GPR55/ITK/S1PR4	3
BP	GO:0010922	positive regulation of phosphatase activity	3/397	28/18870	0.0205096	0.166842	0.145885	FCRL3/IFNG/PTPRC	3
BP	GO:0001547	antral ovarian follicle growth	2/397	11/18870	0.0214179	0.16845	0.147292	ESR1/NPPC	2
BP	GO:0001865	NK T cell differentiation	2/397	11/18870	0.0214179	0.16845	0.147292	ITK/ZNF683	2
BP	GO:0002423	natural killer cell mediated immune response to tumor cell	2/397	11/18870	0.0214179	0.16845	0.147292	CRTAM/NKG7	2
BP	GO:0002604	regulation of dendritic cell antigen processing and presentation	2/397	11/18870	0.0214179	0.16845	0.147292	CCL19/CCR7	2
BP	GO:0002725	negative regulation of T cell cytokine production	2/397	11/18870	0.0214179	0.16845	0.147292	SLAMF1/TBX21	2
BP	GO:0002775	antimicrobial peptide production	2/397	11/18870	0.0214179	0.16845	0.147292	LGALS4/SPINK5	2
BP	GO:0021559	trigeminal nerve development	2/397	11/18870	0.0214179	0.16845	0.147292	DRGX/TIFAB	2
BP	GO:0032966	negative regulation of collagen biosynthetic process	2/397	11/18870	0.0214179	0.16845	0.147292	CIITA/NPPC	2
BP	GO:0033632	regulation of cell-cell adhesion mediated by integrin	2/397	11/18870	0.0214179	0.16845	0.147292	CD3E/CXCL13	2
BP	GO:0034163	regulation of toll-like receptor 9 signaling pathway	2/397	11/18870	0.0214179	0.16845	0.147292	FCRL3/LILRA4	2
BP	GO:0042989	sequestering of actin monomers	2/397	11/18870	0.0214179	0.16845	0.147292	TMSB15A/TMSB4Y	2
BP	GO:0043320	natural killer cell degranulation	2/397	11/18870	0.0214179	0.16845	0.147292	CORO1A/NKG7	2
BP	GO:0044848	biological phase	2/397	11/18870	0.0214179	0.16845	0.147292	SPINK5/SYCP2	2
BP	GO:0046549	retinal cone cell development	2/397	11/18870	0.0214179	0.16845	0.147292	CRB2/RORB	2
BP	GO:0035094	response to nicotine	4/397	51/18870	0.0221802	0.173589	0.151785	BCL2/CHRNA6/PENK/VCAM1	4
BP	GO:0007292	female gamete generation	8/397	163/18870	0.0222282	0.173589	0.151785	BCL2/FUT6/HPGD/M1AP/NPPC/SEPTIN1/SYCP2/YBX2	8
BP	GO:0044409	entry into host	8/397	163/18870	0.0222282	0.173589	0.151785	CCR5/CIITA/CR2/CXCR4/GPR15/ITGB7/SLAMF1/TMPRSS2	8
BP	GO:0045055	regulated exocytosis	10/397	227/18870	0.0223366	0.174026	0.152167	CCR2/CD177/CORO1A/DOC2B/NKG7/PRKCB/PTGDS/RASGRP1/SYNGR3/TRPV6	10
BP	GO:0050868	negative regulation of T cell activation	7/397	133/18870	0.0225239	0.174285	0.152393	CRTAM/FOXJ1/LAX1/PLA2G2D/SPN/TBX21/TIGIT	7
BP	GO:0045830	positive regulation of isotype switching	3/397	29/18870	0.0225274	0.174285	0.152393	CD28/PTPRC/TBX21	3
BP	GO:0090025	regulation of monocyte chemotaxis	3/397	29/18870	0.0225274	0.174285	0.152393	CCR2/CXCL17/DEFB124	3
BP	GO:0048469	cell maturation	9/397	195/18870	0.0225874	0.174343	0.152444	BCL2/CCL19/FOXA1/FOXJ1/FUT6/NPPC/RND1/SOX8/TCP11	9
BP	GO:0071695	anatomical structure maturation	11/397	261/18870	0.0228036	0.175603	0.153546	BCL2/CCL19/FOXA1/FOXJ1/FUT6/LTF/NPPC/RND1/SOX8/SPINK5/TCP11	11
BP	GO:0043410	positive regulation of MAPK cascade	17/397	474/18870	0.0235345	0.1808	0.15809	ALKAL2/BANK1/CCL19/CCR7/CD27/CXCL17/FCRL3/FLT3/GPR55/IL34/KL/MAP4K1/NCF1/PTPRC/RASGRP1/SCIMP/SLAMF1	17
BP	GO:0002269	leukocyte activation involved in inflammatory response	4/397	52/18870	0.0236418	0.1808	0.15809	IFNG/PTPRC/SCNN1B/STAP1	4
BP	GO:0035306	positive regulation of dephosphorylation	4/397	52/18870	0.0236418	0.1808	0.15809	FCRL3/IFNG/PPP1R16B/PTPRC	4
BP	GO:0002200	somatic diversification of immune receptors	5/397	78/18870	0.0242786	0.184395	0.161233	BATF/CD28/CD40LG/PTPRC/TBX21	5
BP	GO:0019233	sensory perception of pain	5/397	78/18870	0.0242786	0.184395	0.161233	CCR2/CXCR4/GPR171/GRIN2A/PENK	5
BP	GO:0060191	regulation of lipase activity	5/397	78/18870	0.0242786	0.184395	0.161233	ESR1/GPR55/ITK/PLIN5/S1PR4	5
BP	GO:0060219	camera-type eye photoreceptor cell differentiation	3/397	30/18870	0.0246493	0.186783	0.163321	CRB2/RORB/SOX8	3
BP	GO:0002833	positive regulation of response to biotic stimulus	14/397	369/18870	0.0250185	0.188636	0.164941	CRTAM/ESR1/FCRL3/IRF4/LILRA4/LTF/NCR3/NLRC3/PYHIN1/RASGRP1/SCIMP/SH2D1A/SLAMF6/TLR10	14
BP	GO:0002702	positive regulation of production of molecular mediator of immune response	7/397	136/18870	0.0250726	0.188636	0.164941	CD28/MZB1/PTPRC/SASH3/SCIMP/SLAMF1/TBX21	7
BP	GO:0002645	positive regulation of tolerance induction	2/397	12/18870	0.0253484	0.188636	0.164941	CD3E/FOXJ1	2
BP	GO:0010713	negative regulation of collagen metabolic process	2/397	12/18870	0.0253484	0.188636	0.164941	CIITA/NPPC	2
BP	GO:0034154	toll-like receptor 7 signaling pathway	2/397	12/18870	0.0253484	0.188636	0.164941	LILRA4/SCIMP	2
BP	GO:0035112	genitalia morphogenesis	2/397	12/18870	0.0253484	0.188636	0.164941	SYCP2/TIFAB	2
BP	GO:0071389	cellular response to mineralocorticoid stimulus	2/397	12/18870	0.0253484	0.188636	0.164941	SCNN1B/SCNN1G	2
BP	GO:2000508	regulation of dendritic cell chemotaxis	2/397	12/18870	0.0253484	0.188636	0.164941	CCR7/SLAMF1	2
BP	GO:0007249	canonical NF-kappaB signal transduction	12/397	300/18870	0.0256069	0.190132	0.16625	CCL19/CCR7/DEFB124/ESR1/FASLG/LTB/LTF/NLRC3/PIM2/PRKCB/RHOH/TIFAB	12
BP	GO:0007266	Rho protein signal transduction	7/397	137/18870	0.0259643	0.191928	0.16782	ARHGAP4/GPR174/GPR18/GPR55/P2RY10/P2RY8/TAGAP	7
BP	GO:0010466	negative regulation of peptidase activity	7/397	137/18870	0.0259643	0.191928	0.16782	CRB2/LTF/SERPINB11/SERPINB12/SERPINI1/SPINK5/SPOCK2	7
BP	GO:1903556	negative regulation of tumor necrosis factor superfamily cytokine production	5/397	80/18870	0.0267345	0.196473	0.171794	GPR18/LILRA4/LTF/NLRC3/SLAMF1	5
BP	GO:0033674	positive regulation of kinase activity	13/397	337/18870	0.0268045	0.196473	0.171794	CCL19/CCR7/CD19/DYNAP/FLT3/IFNG/IL34/LTF/NCF1/PTPRC/RASGRP1/TCIM/TCL1A	13
BP	GO:0033688	regulation of osteoblast proliferation	3/397	31/18870	0.0268752	0.196473	0.171794	BCL2/LTF/SOX8	3
BP	GO:0034755	iron ion transmembrane transport	3/397	31/18870	0.0268752	0.196473	0.171794	IFNG/LTF/TF	3
BP	GO:2000273	positive regulation of signaling receptor activity	3/397	31/18870	0.0268752	0.196473	0.171794	CCR2/IFNG/NCF1	3
BP	GO:0002573	myeloid leukocyte differentiation	10/397	235/18870	0.0275146	0.200705	0.175495	BATF/CCL19/CCR7/GPR55/IFNG/IL34/IRF4/LTF/NKX2-3/TF	10
BP	GO:0006766	vitamin metabolic process	6/397	109/18870	0.0276823	0.201486	0.176178	BCO1/CYP27A1/CYP4F12/IFNG/VNN1/VNN2	6
BP	GO:0001708	cell fate specification	6/397	110/18870	0.028781	0.208568	0.18237	DMRTA2/EOMES/EYA2/FOXA1/TBX21/TLX3	6
BP	GO:1902476	chloride transmembrane transport	6/397	110/18870	0.028781	0.208568	0.18237	BEST2/CLCA4/GABRP/OCA2/SLC1A1/SLC26A9	6
BP	GO:0002313	mature B cell differentiation involved in immune response	3/397	32/18870	0.0292048	0.208648	0.18244	IRF8/NKX2-3/POU2AF1	3
BP	GO:0070227	lymphocyte apoptotic process	5/397	82/18870	0.0293434	0.208648	0.18244	BCL2/CD27/CD3G/FASLG/PDCD1	5
BP	GO:0002638	negative regulation of immunoglobulin production	2/397	13/18870	0.0295465	0.208648	0.18244	CD22/FCRL3	2
BP	GO:0021978	telencephalon regionalization	2/397	13/18870	0.0295465	0.208648	0.18244	DMRTA2/EOMES	2
BP	GO:0032823	regulation of natural killer cell differentiation	2/397	13/18870	0.0295465	0.208648	0.18244	RASGRP1/ZNF683	2
BP	GO:0033690	positive regulation of osteoblast proliferation	2/397	13/18870	0.0295465	0.208648	0.18244	LTF/SOX8	2
BP	GO:0035589	G protein-coupled purinergic nucleotide receptor signaling pathway	2/397	13/18870	0.0295465	0.208648	0.18244	GPR171/P2RY8	2
BP	GO:0042492	gamma-delta T cell differentiation	2/397	13/18870	0.0295465	0.208648	0.18244	GPR18/PTPRC	2
BP	GO:0042670	retinal cone cell differentiation	2/397	13/18870	0.0295465	0.208648	0.18244	CRB2/RORB	2
BP	GO:0045916	negative regulation of complement activation	2/397	13/18870	0.0295465	0.208648	0.18244	CR2/SUSD4	2
BP	GO:0070493	thrombin-activated receptor signaling pathway	2/397	13/18870	0.0295465	0.208648	0.18244	GP1BA/HPGD	2
BP	GO:0072683	T cell extravasation	2/397	13/18870	0.0295465	0.208648	0.18244	CCR2/ITGAL	2
BP	GO:0001818	negative regulation of cytokine production	14/397	381/18870	0.0316099	0.221826	0.193963	BANK1/CCR7/CD96/FOXJ1/GPR18/IFNG/LILRA4/LTF/NLRC3/PTPRC/SLAMF1/SPINK7/TBX21/TIGIT	14
BP	GO:0038094	Fc-gamma receptor signaling pathway	3/397	33/18870	0.0316378	0.221826	0.193963	CD247/LCK/PTPRC	3
BP	GO:0050891	multicellular organismal-level water homeostasis	3/397	33/18870	0.0316378	0.221826	0.193963	CYP4F12/SCNN1B/SCNN1G	3
BP	GO:0006584	catecholamine metabolic process	4/397	57/18870	0.0318136	0.221826	0.193963	GRIN2A/INSM1/KL/SLC1A1	4
BP	GO:0009712	catechol-containing compound metabolic process	4/397	57/18870	0.0318136	0.221826	0.193963	GRIN2A/INSM1/KL/SLC1A1	4
BP	GO:1901616	organic hydroxy compound catabolic process	4/397	57/18870	0.0318136	0.221826	0.193963	CYP27A1/CYP4F12/MIOX/SULT1B1	4
BP	GO:1901222	regulation of non-canonical NF-kappaB signal transduction	6/397	113/18870	0.032248	0.224384	0.1962	C1QTNF4/CCL19/CD27/NLRC3/NR3C2/TCIM	6
BP	GO:0031663	lipopolysaccharide-mediated signaling pathway	4/397	58/18870	0.0336229	0.228674	0.19995	CD6/LTF/SCIMP/TIFAB	4
BP	GO:0070231	T cell apoptotic process	4/397	58/18870	0.0336229	0.228674	0.19995	BCL2/CD27/FASLG/PDCD1	4
BP	GO:0045834	positive regulation of lipid metabolic process	7/397	145/18870	0.0338859	0.228674	0.19995	CCL19/CCR7/CD19/FLT3/IFNG/PLIN5/STAR	7
BP	GO:0002467	germinal center formation	2/397	14/18870	0.0339991	0.228674	0.19995	CXCL13/FOXJ1	2
BP	GO:0042415	norepinephrine metabolic process	2/397	14/18870	0.0339991	0.228674	0.19995	INSM1/KL	2
BP	GO:0045348	positive regulation of MHC class II biosynthetic process	2/397	14/18870	0.0339991	0.228674	0.19995	CIITA/IFNG	2
BP	GO:0070942	neutrophil mediated cytotoxicity	2/397	14/18870	0.0339991	0.228674	0.19995	DNASE1L3/SCNN1B	2
BP	GO:0072672	neutrophil extravasation	2/397	14/18870	0.0339991	0.228674	0.19995	CD177/FUT7	2
BP	GO:1902047	polyamine transmembrane transport	2/397	14/18870	0.0339991	0.228674	0.19995	ATP13A4/ATP13A5	2
BP	GO:1904152	regulation of retrograde protein transport, ER to cytosol	2/397	14/18870	0.0339991	0.228674	0.19995	DERL3/SVIP	2
BP	GO:2001140	positive regulation of phospholipid transport	2/397	14/18870	0.0339991	0.228674	0.19995	ABCA3/FASLG	2
BP	GO:0008544	epidermis development	14/397	385/18870	0.0340654	0.228674	0.19995	ACER1/BCL2/CALML5/CNFN/CYSRT1/KRT15/KRT36/KRT4/KRT78/LCE3A/LORICRIN/SPINK5/SPRR2F/SPRR3	14
BP	GO:0006887	exocytosis	13/397	349/18870	0.0341455	0.228674	0.19995	CCR2/CD177/CORO1A/DOC2B/EXOC3L4/IFNG/NKG7/PRKCB/PTGDS/RASGRP1/SEPTIN1/SYNGR3/TRPV6	13
BP	GO:0002323	natural killer cell activation involved in immune response	3/397	34/18870	0.0341736	0.228674	0.19995	CORO1A/NKG7/ZNF683	3
BP	GO:0010669	epithelial structure maintenance	3/397	34/18870	0.0341736	0.228674	0.19995	MUC4/MUC6/TFF3	3
BP	GO:0046475	glycerophospholipid catabolic process	3/397	34/18870	0.0341736	0.228674	0.19995	ENPP6/GDPD3/PLA2G4D	3
BP	GO:0048665	neuron fate specification	3/397	34/18870	0.0341736	0.228674	0.19995	DMRTA2/FOXA1/TLX3	3
BP	GO:0071353	cellular response to interleukin-4	3/397	34/18870	0.0341736	0.228674	0.19995	CORO1A/IL2RG/RUFY4	3
BP	GO:1902624	positive regulation of neutrophil migration	3/397	34/18870	0.0341736	0.228674	0.19995	CCL19/CCR7/FUT7	3
BP	GO:0051701	biological process involved in interaction with host	9/397	211/18870	0.0349843	0.233628	0.204282	CCR5/CIITA/CR2/CXCR4/GPR15/ITGB7/LTF/SLAMF1/TMPRSS2	9
BP	GO:0009913	epidermal cell differentiation	10/397	245/18870	0.035125	0.234096	0.204692	ACER1/CNFN/KRT36/KRT4/KRT78/LCE3A/LORICRIN/SPINK5/SPRR2F/SPRR3	10
BP	GO:0002886	regulation of myeloid leukocyte mediated immunity	4/397	59/18870	0.0354911	0.235119	0.205586	CCR2/CD177/DNASE1L3/STAP1	4
BP	GO:0010517	regulation of phospholipase activity	4/397	59/18870	0.0354911	0.235119	0.205586	ESR1/GPR55/ITK/S1PR4	4
BP	GO:0014009	glial cell proliferation	4/397	59/18870	0.0354911	0.235119	0.205586	IL34/LTA/MYB/PENK	4
BP	GO:0002446	neutrophil mediated immunity	3/397	35/18870	0.0368115	0.242416	0.211966	CD177/DNASE1L3/SCNN1B	3
BP	GO:0002719	negative regulation of cytokine production involved in immune response	3/397	35/18870	0.0368115	0.242416	0.211966	CD96/SLAMF1/TBX21	3
BP	GO:0046471	phosphatidylglycerol metabolic process	3/397	35/18870	0.0368115	0.242416	0.211966	ABCA3/PLA2G2D/PLA2G4D	3
BP	GO:0070228	regulation of lymphocyte apoptotic process	4/397	60/18870	0.0374181	0.245922	0.215032	BCL2/CD27/CD3G/PDCD1	4
BP	GO:0002064	epithelial cell development	9/397	214/18870	0.0377445	0.247089	0.216052	CLDN3/CXCR4/ESR1/FOXA1/FOXJ1/INSM1/PPP1R16B/SOX8/TJP3	9
BP	GO:1903046	meiotic cell cycle process	9/397	214/18870	0.0377445	0.247089	0.216052	CNTD1/M1AP/MEI1/NPPC/SEPTIN1/STAG3/SYCE2/SYCP2/ZNF541	9
BP	GO:0050672	negative regulation of lymphocyte proliferation	5/397	88/18870	0.0381105	0.248994	0.217718	CRTAM/FOXJ1/PLA2G2D/SPN/TNFRSF13B	5
BP	GO:0031960	response to corticosteroid	7/397	149/18870	0.0383908	0.249853	0.21847	ABCA3/BCL2/FLT3/PTGDS/PTPRC/SCNN1B/SCNN1G	7
BP	GO:0002468	dendritic cell antigen processing and presentation	2/397	15/18870	0.0386938	0.249853	0.21847	CCL19/CCR7	2
BP	GO:0002829	negative regulation of type 2 immune response	2/397	15/18870	0.0386938	0.249853	0.21847	CCR2/TBX21	2
BP	GO:0010820	positive regulation of T cell chemotaxis	2/397	15/18870	0.0386938	0.249853	0.21847	CCR2/CXCL13	2
BP	GO:0060221	retinal rod cell differentiation	2/397	15/18870	0.0386938	0.249853	0.21847	RORB/SOX8	2
BP	GO:2001138	regulation of phospholipid transport	2/397	15/18870	0.0386938	0.249853	0.21847	ABCA3/FASLG	2
BP	GO:0048599	oocyte development	4/397	61/18870	0.0394043	0.251956	0.220308	BCL2/FUT6/NPPC/YBX2	4
BP	GO:0071900	regulation of protein serine/threonine kinase activity	11/397	285/18870	0.0394907	0.251956	0.220308	CCL19/CCNI2/CDKN2C/FLT3/IFNG/IL34/LAX1/LTF/RASGRP1/TCIM/TCL1A	11
BP	GO:0006882	intracellular zinc ion homeostasis	3/397	36/18870	0.0395508	0.251956	0.220308	LCK/SLC1A1/TMC8	3
BP	GO:0033687	osteoblast proliferation	3/397	36/18870	0.0395508	0.251956	0.220308	BCL2/LTF/SOX8	3
BP	GO:0045589	regulation of regulatory T cell differentiation	3/397	36/18870	0.0395508	0.251956	0.220308	CD28/IFNG/IL2RG	3
BP	GO:0046164	alcohol catabolic process	3/397	36/18870	0.0395508	0.251956	0.220308	CYP27A1/MIOX/SULT1B1	3
BP	GO:0070670	response to interleukin-4	3/397	36/18870	0.0395508	0.251956	0.220308	CORO1A/IL2RG/RUFY4	3
BP	GO:0032945	negative regulation of mononuclear cell proliferation	5/397	89/18870	0.0397113	0.252494	0.220778	CRTAM/FOXJ1/PLA2G2D/SPN/TNFRSF13B	5
BP	GO:0019058	viral life cycle	12/397	321/18870	0.0398527	0.252908	0.221141	BCL2/CCR5/CD28/CIITA/CR2/CXCR4/CXCR6/GPR15/ITGB7/LTF/SLAMF1/TMPRSS2	12
BP	GO:0046578	regulation of Ras protein signal transduction	8/397	183/18870	0.0401457	0.254281	0.222341	GPR174/GPR18/GPR55/P2RY10/P2RY8/RASAL3/RASGRP1/TAGAP	8
BP	GO:0044403	biological process involved in symbiotic interaction	12/397	322/18870	0.0406465	0.256963	0.224687	CCR5/CIITA/CR2/CXCR4/CYSRT1/GPR15/ITGB7/LTF/SCNN1B/SLAMF1/ST6GALNAC1/TMPRSS2	12
BP	GO:0002718	regulation of cytokine production involved in immune response	6/397	120/18870	0.0413614	0.260986	0.228204	CCR2/CD96/SASH3/SCIMP/SLAMF1/TBX21	6
BP	GO:0032731	positive regulation of interleukin-1 beta production	4/397	62/18870	0.0414495	0.261045	0.228256	CCL19/IFNG/ORM2/PYDC1	4
BP	GO:0070374	positive regulation of ERK1 and ERK2 cascade	9/397	218/18870	0.0416509	0.261817	0.228931	ALKAL2/CCL19/CCR7/CXCL17/GPR55/PTPRC/RASGRP1/SCIMP/SLAMF1	9
BP	GO:1903038	negative regulation of leukocyte cell-cell adhesion	7/397	152/18870	0.0420157	0.263611	0.230499	CRTAM/FOXJ1/LAX1/PLA2G2D/SPN/TBX21/TIGIT	7
BP	GO:0009410	response to xenobiotic stimulus	15/397	434/18870	0.0421507	0.263959	0.230803	ABCA3/BCL2/CES3/CXCR4/CYP2E1/CYP4F12/GRIN2A/LCK/LTA/NOS2/NPPC/PRKCB/SCNN1B/SLC1A1/SULT1B1	15
BP	GO:0033280	response to vitamin D	3/397	37/18870	0.0423905	0.264463	0.231244	KL/PENK/PRKCB	3
BP	GO:0051385	response to mineralocorticoid	3/397	37/18870	0.0423905	0.264463	0.231244	PTPRC/SCNN1B/SCNN1G	3
BP	GO:0045132	meiotic chromosome segregation	5/397	91/18870	0.0430339	0.26612	0.232693	M1AP/SEPTIN1/STAG3/SYCE2/SYCP2	5
BP	GO:0009615	response to virus	15/397	436/18870	0.043568	0.26612	0.232693	BCL2/CCL19/CXCR4/DUOX2/IFNG/LILRA4/NLRC3/PENK/PIM2/POU2AF1/PTPRC/SPN/TBX21/VWCE/WDFY4	15
BP	GO:0002903	negative regulation of B cell apoptotic process	2/397	16/18870	0.0436184	0.26612	0.232693	BCL2/PDCD1	2
BP	GO:0006004	fucose metabolic process	2/397	16/18870	0.0436184	0.26612	0.232693	FUT6/FUT7	2
BP	GO:0006750	glutathione biosynthetic process	2/397	16/18870	0.0436184	0.26612	0.232693	GGT6/SLC1A1	2
BP	GO:0010819	regulation of T cell chemotaxis	2/397	16/18870	0.0436184	0.26612	0.232693	CCR2/CXCL13	2
BP	GO:0015846	polyamine transport	2/397	16/18870	0.0436184	0.26612	0.232693	ATP13A4/ATP13A5	2
BP	GO:0023035	CD40 signaling pathway	2/397	16/18870	0.0436184	0.26612	0.232693	CD40LG/SLAMF1	2
BP	GO:0030201	heparan sulfate proteoglycan metabolic process	2/397	16/18870	0.0436184	0.26612	0.232693	HS3ST4/HS3ST6	2
BP	GO:0045579	positive regulation of B cell differentiation	2/397	16/18870	0.0436184	0.26612	0.232693	CD27/IL2RG	2
BP	GO:0050665	hydrogen peroxide biosynthetic process	2/397	16/18870	0.0436184	0.26612	0.232693	DUOX2/DUOXA2	2
BP	GO:0051770	positive regulation of nitric-oxide synthase biosynthetic process	2/397	16/18870	0.0436184	0.26612	0.232693	FCER2/IFNG	2
BP	GO:0002367	cytokine production involved in immune response	6/397	122/18870	0.0442348	0.269386	0.235549	CCR2/CD96/SASH3/SCIMP/SLAMF1/TBX21	6
BP	GO:0032965	regulation of collagen biosynthetic process	3/397	38/18870	0.0453297	0.275045	0.240497	CIITA/MYB/NPPC	3
BP	GO:0035633	maintenance of blood-brain barrier	3/397	38/18870	0.0453297	0.275045	0.240497	CLDN3/SLC1A1/TJP3	3
BP	GO:0044000	movement in host	8/397	188/18870	0.0457979	0.277223	0.242402	CCR5/CIITA/CR2/CXCR4/GPR15/ITGB7/SLAMF1/TMPRSS2	8
BP	GO:0045807	positive regulation of endocytosis	7/397	155/18870	0.0458558	0.277223	0.242402	CCL19/IFNG/IL2RG/PTPRC/SIRPG/STAP1/TF	7
BP	GO:0048545	response to steroid hormone	12/397	330/18870	0.0473986	0.286029	0.250101	ABCA3/BCL2/ESR1/FLT3/FOXA1/NR3C2/PTGDS/PTPRC/RHOXF1/SCGB2A1/SCNN1B/SCNN1G	12
BP	GO:0009994	oocyte differentiation	4/397	65/18870	0.0479395	0.287724	0.251583	BCL2/FUT6/NPPC/YBX2	4
BP	GO:0046503	glycerolipid catabolic process	4/397	65/18870	0.0479395	0.287724	0.251583	ENPP6/GDPD3/PLA2G4D/PLIN5	4
BP	GO:0060042	retina morphogenesis in camera-type eye	4/397	65/18870	0.0479395	0.287724	0.251583	CRB2/RORB/SLC1A1/SOX8	4
BP	GO:0001662	behavioral fear response	3/397	39/18870	0.0483673	0.288043	0.251862	BCL2/PENK/SLC1A1	3
BP	GO:0045191	regulation of isotype switching	3/397	39/18870	0.0483673	0.288043	0.251862	CD28/PTPRC/TBX21	3
BP	GO:0070229	negative regulation of lymphocyte apoptotic process	3/397	39/18870	0.0483673	0.288043	0.251862	BCL2/CD27/PDCD1	3
BP	GO:0009068	aspartate family amino acid catabolic process	2/397	17/18870	0.0487613	0.288043	0.251862	ASRGL1/CRYM	2
BP	GO:0033631	cell-cell adhesion mediated by integrin	2/397	17/18870	0.0487613	0.288043	0.251862	CD3E/CXCL13	2
BP	GO:0071468	cellular response to acidic pH	2/397	17/18870	0.0487613	0.288043	0.251862	SCNN1B/SCNN1G	2
BP	GO:0110096	cellular response to aldehyde	2/397	17/18870	0.0487613	0.288043	0.251862	SCNN1B/SCNN1G	2
BP	GO:2000310	regulation of NMDA receptor activity	2/397	17/18870	0.0487613	0.288043	0.251862	CCR2/IFNG	2
BP	GO:0006821	chloride transport	6/397	125/18870	0.0487737	0.288043	0.251862	BEST2/CLCA4/GABRP/OCA2/SLC1A1/SLC26A9	6
CC	GO:0009897	external side of plasma membrane	45/410	387/19886	3.72e-21	1.209e-18	1.14733e-18	BTNL9/CCR2/CCR4/CCR5/CCR7/CD19/CD2/CD22/CD27/CD28/CD3D/CD3E/CD3G/CD40LG/CD5/CD79A/CD79B/CD8A/CEACAM21/CLEC10A/CSF2RB/CXCR3/CXCR4/CXCR6/FASLG/FCER2/FCRL6/GP1BA/IL21R/IL2RG/ITGAL/LY9/MS4A1/PDCD1/PTPRC/SCNN1B/SCNN1G/SELL/SLAMF1/SLAMF6/SLC2A4/SPN/TNFRSF13C/VCAM1/XCR1	45
CC	GO:0001772	immunological synapse	10/410	45/19886	2.08452e-08	3.38734e-06	3.21455e-06	CD28/CD37/CD3E/CD6/CORO1A/CRTAM/LCK/RHOH/SCIMP/ZAP70	10
CC	GO:0098802	plasma membrane signaling receptor complex	20/410	321/19886	1.25992e-05	0.00136492	0.00129529	CD247/CD3D/CD3E/CD3G/CD79A/CD79B/CD8A/CD8B/CHRNA6/CSF2RB/GP1BA/GRIN2A/HTR3A/ITGAL/ITGB7/SHISA8/TF/TMIGD2/TRAT1/ZAP70	20
CC	GO:0042105	alpha-beta T cell receptor complex	4/410	12/19886	7.7306e-05	0.00628112	0.0059607	CD247/CD3D/CD3E/CD3G	4
CC	GO:0001533	cornified envelope	7/410	60/19886	0.000226676	0.0147339	0.0139823	CNFN/CYSRT1/LORICRIN/RPTN/SERPINB12/SPRR2F/SPRR3	7
CC	GO:0045121	membrane raft	16/410	286/19886	0.000314989	0.0152022	0.0144267	CD177/CD19/CD48/CD79A/CD8A/FASLG/ITLN1/KCNA3/LCK/MAL/MS4A1/PTPRC/SLC1A1/SLC2A4/TEX101/ZAP70	16
CC	GO:0098857	membrane microdomain	16/410	287/19886	0.000327433	0.0152022	0.0144267	CD177/CD19/CD48/CD79A/CD8A/FASLG/ITLN1/KCNA3/LCK/MAL/MS4A1/PTPRC/SLC1A1/SLC2A4/TEX101/ZAP70	16
CC	GO:0044305	calyx of Held	3/410	19/19886	0.0065953	0.267478	0.253833	KCNA3/PRKCB/TSPOAP1	3
CC	GO:0045177	apical part of cell	18/410	469/19886	0.0089638	0.267478	0.253833	AJM1/CEACAM5/CEACAM7/CLCA4/CRB2/CYP4F12/DUOX2/DUOXA2/KL/MAL/MUC20/RHCG/SCNN1B/SCNN1G/SLC1A1/SLC26A9/TF/VCAM1	18
CC	GO:0000795	synaptonemal complex	4/410	40/19886	0.00906087	0.267478	0.253833	SMC1B/STAG3/SYCE2/SYCP2	4
CC	GO:0099086	synaptonemal structure	4/410	40/19886	0.00906087	0.267478	0.253833	SMC1B/STAG3/SYCE2/SYCP2	4
CC	GO:0016324	apical plasma membrane	16/410	403/19886	0.0098761	0.267478	0.253833	AJM1/CEACAM5/CEACAM7/CLCA4/CRB2/CYP4F12/DUOX2/KL/MAL/MUC20/RHCG/SCNN1B/SCNN1G/SLC1A1/SLC26A9/TF	16
CC	GO:0042101	T cell receptor complex	8/410	147/19886	0.0113573	0.283933	0.269449	CD247/CD3D/CD3E/CD3G/CD8A/CD8B/TRAT1/ZAP70	8
CC	GO:0031234	extrinsic component of cytoplasmic side of plasma membrane	5/410	71/19886	0.0155777	0.344805	0.327216	BLK/CARMIL2/GNG8/LCK/ZAP70	5
CC	GO:0046930	pore complex	3/410	26/19886	0.0159141	0.344805	0.327216	BCL2/C7/C8G	3
CC	GO:0008278	cohesin complex	2/410	10/19886	0.0171033	0.34741	0.329688	SMC1B/STAG3	2
CC	GO:0000794	condensed nuclear chromosome	5/410	81/19886	0.0259943	0.367163	0.348434	RAD9B/SMC1B/STAG3/SYCE2/SYCP2	5
CC	GO:0009898	cytoplasmic side of plasma membrane	8/410	173/19886	0.0273451	0.367163	0.348434	BLK/CARMIL2/CD2/GNG8/LCK/NCF1/PTPRC/ZAP70	8
CC	GO:0001931	uropod	2/410	13/19886	0.0284639	0.367163	0.348434	SCIMP/SPN	2
CC	GO:0044194	cytolytic granule	2/410	13/19886	0.0284639	0.367163	0.348434	GZMH/NKG7	2
CC	GO:0071735	IgG immunoglobulin complex	2/410	13/19886	0.0284639	0.367163	0.348434	IGLL1/IGLL5	2
CC	GO:0044853	plasma membrane raft	6/410	112/19886	0.0285564	0.367163	0.348434	CD177/CD8A/FASLG/MAL/MS4A1/TEX101	6
CC	GO:0043679	axon terminus	6/410	113/19886	0.0296547	0.367163	0.348434	KCNA3/PENK/PNOC/PRKCB/SLC1A1/TSPOAP1	6
CC	GO:0098636	protein complex involved in cell adhesion	4/410	57/19886	0.0298602	0.367163	0.348434	CD28/ITGAL/ITGB7/LGALS2	4
CC	GO:0030667	secretory granule membrane	12/410	314/19886	0.0303869	0.367163	0.348434	ABCA3/CD177/IRAG2/ITGAL/PTPRC/RAB37/SELL/SERPINB12/SVIP/TBC1D10C/TEX101/VNN1	12
CC	GO:0005770	late endosome	12/410	315/19886	0.0310284	0.367163	0.348434	ABCA3/ATP10B/ATP13A4/ATP13A5/CD79A/CXCR4/PARM1/SLA2/SLC1A1/SLC2A4/SMIM22/TF	12
CC	GO:0098562	cytoplasmic side of membrane	9/410	211/19886	0.0313952	0.367163	0.348434	BLK/CARMIL2/CD2/GNG8/LCK/NCF1/PTPRC/RASAL3/ZAP70	9
CC	GO:0000800	lateral element	2/410	14/19886	0.0327623	0.367163	0.348434	SMC1B/SYCP2	2
CC	GO:0031254	cell trailing edge	2/410	14/19886	0.0327623	0.367163	0.348434	SCIMP/SPN	2
CC	GO:0008180	COP9 signalosome	2/410	17/19886	0.0470253	0.48333	0.458674	TESPA1/THEMIS	2
CC	GO:0042599	lamellar body	2/410	17/19886	0.0470253	0.48333	0.458674	ABCA3/SPINK5	2
CC	GO:0034702	monoatomic ion channel complex	11/410	300/19886	0.0475894	0.48333	0.458674	BEST2/CHRNA6/GABRP/GRIN2A/HTR3A/KCNA3/KCNS1/SCNN1B/SCNN1G/SHISA8/TRPV6	11
MF	GO:0015026	coreceptor activity	12/390	49/18496	2.98084e-10	1.59177e-07	1.40884e-07	CCR5/CD28/CD8A/CD8B/CD8B2/CSF2RB/CXCR4/CXCR6/GPR15/IL2RG/LILRA4/TMIGD2	12
MF	GO:0016493	C-C chemokine receptor activity	8/390	23/18496	1.35222e-08	1.87395e-06	1.6586e-06	CCR2/CCR4/CCR5/CCR7/CXCR3/CXCR4/CXCR6/XCR1	8
MF	GO:0004896	cytokine receptor activity	14/390	96/18496	1.35775e-08	1.87395e-06	1.6586e-06	CCR2/CCR4/CCR5/CCR7/CSF2RB/CXCR3/CXCR4/CXCR6/FLT3/IL17RB/IL17REL/IL21R/IL2RG/XCR1	14
MF	GO:0140375	immune receptor activity	17/390	147/18496	1.40371e-08	1.87395e-06	1.6586e-06	CCR2/CCR4/CCR5/CCR7/CR2/CSF2RB/CXCR3/CXCR4/CXCR6/FCER2/FLT3/IL17RB/IL17REL/IL21R/IL2RG/LILRA4/XCR1	17
MF	GO:0019957	C-C chemokine binding	8/390	24/18496	1.99118e-08	2.12658e-06	1.88219e-06	CCR2/CCR4/CCR5/CCR7/CXCR3/CXCR4/CXCR6/XCR1	8
MF	GO:0001637	G protein-coupled chemoattractant receptor activity	8/390	26/18496	4.07618e-08	3.10954e-06	2.75219e-06	CCR2/CCR4/CCR5/CCR7/CXCR3/CXCR4/CXCR6/XCR1	8
MF	GO:0004950	chemokine receptor activity	8/390	26/18496	4.07618e-08	3.10954e-06	2.75219e-06	CCR2/CCR4/CCR5/CCR7/CXCR3/CXCR4/CXCR6/XCR1	8
MF	GO:0019956	chemokine binding	8/390	33/18496	3.18341e-07	2.12492e-05	1.88072e-05	CCR2/CCR4/CCR5/CCR7/CXCR3/CXCR4/CXCR6/XCR1	8
MF	GO:0005125	cytokine activity	16/390	237/18496	4.58931e-05	0.00272299	0.00241006	ALKAL2/C1QTNF4/CCL19/CD40LG/CXCL13/FAM3B/FAM3D/FASLG/IFNG/IL19/IL34/IL36A/LTA/LTB/SLURP1/TNFSF8	16
MF	GO:0019955	cytokine binding	11/390	145/18496	0.000258093	0.0137821	0.0121983	CCR2/CCR4/CCR5/CCR7/CXCR3/CXCR4/CXCR6/IL2RG/TMC8/WFIKKN1/XCR1	11
MF	GO:0005164	tumor necrosis factor receptor binding	5/390	31/18496	0.000439292	0.0213256	0.0188748	CD40LG/FASLG/LTA/LTB/TNFSF8	5
MF	GO:0016709	oxidoreductase activity, acting on paired donors, with incorporation or reduction of molecular oxygen, NAD(P)H as one donor, and incorporation of one atom of oxygen	5/390	38/18496	0.00115009	0.0469165	0.0415248	CYP27A1/CYP2E1/CYP4X1/FMO3/NOS2	5
MF	GO:0004252	serine-type endopeptidase activity	11/390	174/18496	0.00119311	0.0469165	0.0415248	GZMH/GZMK/GZMM/KLK12/LTF/PRSS27/PRSS36/RHBDL3/TMPRSS11A/TMPRSS11B/TMPRSS2	11
MF	GO:0005216	monoatomic ion channel activity	20/390	443/18496	0.00123002	0.0469165	0.0415248	ANXA9/BEST2/CALHM1/CHRNA6/CLCA4/GABRP/GRIN2A/HTR3A/KCNA3/KCNJ18/KCNS1/OCA2/SCNN1B/SCNN1G/SLC1A1/SLC26A9/TMC8/TMEM150C/TRPV6/TSPOAP1	20
MF	GO:0042608	T cell receptor binding	3/390	11/18496	0.00135333	0.0481785	0.0426417	CD3E/CD3G/LCK	3
MF	GO:0019865	immunoglobulin binding	4/390	24/18496	0.0014806	0.0483769	0.0428173	CD22/FCER2/JCHAIN/MS4A1	4
MF	GO:0004497	monooxygenase activity	8/390	104/18496	0.00161079	0.0483769	0.0428173	CYP27A1/CYP2E1/CYP4B1/CYP4F12/CYP4X1/FMO3/MIOX/NOS2	8
MF	GO:0042169	SH2 domain binding	5/390	41/18496	0.00163068	0.0483769	0.0428173	LAX1/LCK/SIT1/SLAMF1/SYNGR3	5
MF	GO:0008417	fucosyltransferase activity	3/390	13/18496	0.00227335	0.0638931	0.0565504	FUT3/FUT6/FUT7	3
MF	GO:0008236	serine-type peptidase activity	11/390	192/18496	0.00260104	0.0694478	0.0614667	GZMH/GZMK/GZMM/KLK12/LTF/PRSS27/PRSS36/RHBDL3/TMPRSS11A/TMPRSS11B/TMPRSS2	11
MF	GO:0017171	serine hydrolase activity	11/390	196/18496	0.00304848	0.0741004	0.0655846	GZMH/GZMK/GZMM/KLK12/LTF/PRSS27/PRSS36/RHBDL3/TMPRSS11A/TMPRSS11B/TMPRSS2	11
MF	GO:0004866	endopeptidase inhibitor activity	10/390	168/18496	0.00305282	0.0741004	0.0655846	CRB2/HMSD/LTF/SERPINB11/SERPINB12/SERPINI1/SPINK5/SPINK7/SPOCK2/WFIKKN1	10
MF	GO:0061134	peptidase regulator activity	12/390	228/18496	0.0034026	0.0789994	0.0699206	CRB2/HMSD/LTF/MAL/SERPINB11/SERPINB12/SERPINI1/SPINK5/SPINK7/SPOCK2/TIFAB/WFIKKN1	12
MF	GO:0032813	tumor necrosis factor receptor superfamily binding	5/390	49/18496	0.00361719	0.0804825	0.0712333	CD40LG/FASLG/LTA/LTB/TNFSF8	5
MF	GO:0016782	transferase activity, transferring sulphur-containing groups	6/390	71/18496	0.00382255	0.0816496	0.0722663	ACSM3/CHST4/GAL3ST2/HS3ST4/HS3ST6/SULT1B1	6
MF	GO:0030414	peptidase inhibitor activity	10/390	175/18496	0.00408226	0.0838434	0.0742079	CRB2/HMSD/LTF/SERPINB11/SERPINB12/SERPINI1/SPINK5/SPINK7/SPOCK2/WFIKKN1	10
MF	GO:1990782	protein tyrosine kinase binding	8/390	123/18496	0.00456751	0.0903351	0.0799536	ALKAL2/BANK1/CD2/CD247/CEACAM7/FCRL3/STAP1/TRAT1	8
MF	GO:0008146	sulfotransferase activity	5/390	53/18496	0.00508366	0.0969526	0.0858106	CHST4/GAL3ST2/HS3ST4/HS3ST6/SULT1B1	5
MF	GO:0004867	serine-type endopeptidase inhibitor activity	7/390	101/18496	0.00553868	0.101988	0.0902675	HMSD/SERPINB11/SERPINB12/SERPINI1/SPINK5/SPINK7/WFIKKN1	7
MF	GO:0061135	endopeptidase regulator activity	10/390	184/18496	0.00578879	0.10304	0.0911989	CRB2/HMSD/LTF/SERPINB11/SERPINB12/SERPINI1/SPINK5/SPINK7/SPOCK2/WFIKKN1	10
MF	GO:0001618	virus receptor activity	6/390	79/18496	0.00645018	0.110886	0.0981428	CCR5/CR2/CXCR4/GPR15/ITGB7/SLAMF1	6
MF	GO:0030280	structural constituent of skin epidermis	4/390	36/18496	0.00673023	0.110886	0.0981428	KRT36/KRT4/KRT78/LORICRIN	4
MF	GO:0140272	exogenous protein binding	6/390	80/18496	0.00685251	0.110886	0.0981428	CCR5/CR2/CXCR4/GPR15/ITGB7/SLAMF1	6
MF	GO:0042288	MHC class I protein binding	3/390	20/18496	0.00812402	0.127595	0.112931	CD8A/CD8B/CD8B2	3
MF	GO:0033691	sialic acid binding	3/390	22/18496	0.010639	0.162321	0.143667	CD22/SELL/SIGLEC8	3
MF	GO:0042287	MHC protein binding	4/390	42/18496	0.0115885	0.171896	0.152141	CD8A/CD8B/CD8B2/FCRL6	4
MF	GO:0043274	phospholipase binding	3/390	23/18496	0.0120467	0.173863	0.153882	BANK1/LCK/TESPA1	3
MF	GO:0005126	cytokine receptor binding	12/390	273/18496	0.0134698	0.189286	0.167533	CCL19/CCR2/CD40LG/CXCL13/FASLG/IFNG/IL34/IL36A/LTA/LTB/STAP1/TNFSF8	12
MF	GO:0004715	non-membrane spanning protein tyrosine kinase activity	4/390	45/18496	0.0146868	0.198499	0.175687	BLK/ITK/LCK/ZAP70	4
MF	GO:0043548	phosphatidylinositol 3-kinase binding	3/390	25/18496	0.0151683	0.198499	0.175687	CORO1A/LCK/NLRC3	3
MF	GO:0005253	monoatomic anion channel activity	6/390	95/18496	0.0152685	0.198499	0.175687	BEST2/CLCA4/GABRP/OCA2/SLC1A1/SLC26A9	6
MF	GO:0005506	iron ion binding	8/390	153/18496	0.0160034	0.198499	0.175687	CYP27A1/CYP2E1/CYP4B1/CYP4F12/CYP4X1/LTF/MIOX/TF	8
MF	GO:0070330	aromatase activity	3/390	26/18496	0.0168839	0.198499	0.175687	CYP2E1/CYP4B1/CYP4F12	3
MF	GO:0016811	hydrolase activity, acting on carbon-nitrogen (but not peptide) bonds, in linear amides	5/390	71/18496	0.0169876	0.198499	0.175687	ACER1/ASRGL1/UPB1/VNN1/VNN2	5
MF	GO:0001784	phosphotyrosine residue binding	4/390	47/18496	0.0170168	0.198499	0.175687	GRAP2/LCK/STAP1/ZAP70	4
MF	GO:0035591	signaling adaptor activity	6/390	98/18496	0.0175564	0.198499	0.175687	BANK1/CD3E/CD3G/SLA2/STAP1/TRAT1	6
MF	GO:0015203	polyamine transmembrane transporter activity	2/390	10/18496	0.0178426	0.198499	0.175687	ATP13A4/ATP13A5	2
MF	GO:0016175	superoxide-generating NAD(P)H oxidase activity	2/390	10/18496	0.0178426	0.198499	0.175687	DUOX2/NCF1	2
MF	GO:0004175	endopeptidase activity	15/390	389/18496	0.0186084	0.202793	0.179488	CAPN14/CLCA4/CTSW/GZMH/GZMK/GZMM/KEL/KLK12/LTF/PRSS27/PRSS36/RHBDL3/TMPRSS11A/TMPRSS11B/TMPRSS2	15
MF	GO:0022839	monoatomic ion gated channel activity	13/390	325/18496	0.021011	0.216692	0.191789	CALHM1/CHRNA6/GABRP/GRIN2A/HTR3A/KCNA3/KCNJ18/KCNS1/SCNN1B/SCNN1G/TMC8/TMEM150C/TSPOAP1	13
MF	GO:0022836	gated channel activity	13/390	326/18496	0.0214824	0.216692	0.191789	CALHM1/CHRNA6/GABRP/GRIN2A/HTR3A/KCNA3/KCNJ18/KCNS1/SCNN1B/SCNN1G/TMC8/TMEM150C/TSPOAP1	13
MF	GO:0008199	ferric iron binding	2/390	11/18496	0.0215069	0.216692	0.191789	MIOX/TF	2
MF	GO:0034056	estrogen response element binding	2/390	11/18496	0.0215069	0.216692	0.191789	ESR1/NR3C2	2
MF	GO:0030159	signaling receptor complex adaptor activity	4/390	51/18496	0.0223373	0.219972	0.194692	CD3E/CD3G/STAP1/TRAT1	4
MF	GO:0003785	actin monomer binding	3/390	29/18496	0.0226563	0.219972	0.194692	CORO1A/TMSB15A/TMSB4Y	3
MF	GO:0005544	calcium-dependent phospholipid binding	4/390	53/18496	0.025337	0.238454	0.211051	ANXA9/CPNE5/DOC2B/PLA2G4D	4
MF	GO:0015280	ligand-gated sodium channel activity	2/390	12/18496	0.025453	0.238454	0.211051	SCNN1B/SCNN1G	2
MF	GO:0099094	ligand-gated monoatomic cation channel activity	6/390	110/18496	0.0290441	0.254683	0.225414	CHRNA6/GRIN2A/HTR3A/KCNJ18/SCNN1B/SCNN1G	6
MF	GO:0005254	chloride channel activity	5/390	82/18496	0.0295806	0.254683	0.225414	BEST2/CLCA4/GABRP/OCA2/SLC26A9	5
MF	GO:0019992	diacylglycerol binding	2/390	13/18496	0.0296675	0.254683	0.225414	RASGRP1/RASGRP2	2
MF	GO:0045028	G protein-coupled purinergic nucleotide receptor activity	2/390	13/18496	0.0296675	0.254683	0.225414	GPR171/P2RY8	2
MF	GO:0140333	glycerophospholipid flippase activity	2/390	13/18496	0.0296675	0.254683	0.225414	ABCA3/ATP10B	2
MF	GO:0020037	heme binding	7/390	141/18496	0.0300468	0.254683	0.225414	CYP27A1/CYP2E1/CYP4B1/CYP4F12/CYP4X1/DUOX2/NOS2	7
MF	GO:0002020	protease binding	7/390	142/18496	0.0310567	0.259129	0.22935	ANXA9/BANK1/BCL2/CD177/CD28/DERL3/SELL	7
MF	GO:0004857	enzyme inhibitor activity	14/390	386/18496	0.0352222	0.284798	0.252068	ANXA9/CDKN2C/CRB2/HMSD/LTF/PPP1R16B/RHOH/SERPINB11/SERPINB12/SERPINI1/SPINK5/SPINK7/SPOCK2/WFIKKN1	14
MF	GO:0015276	ligand-gated monoatomic ion channel activity	7/390	146/18496	0.0353234	0.284798	0.252068	CHRNA6/GABRP/GRIN2A/HTR3A/KCNJ18/SCNN1B/SCNN1G	7
MF	GO:0045309	protein phosphorylated amino acid binding	4/390	59/18496	0.0357331	0.284798	0.252068	GRAP2/LCK/STAP1/ZAP70	4
MF	GO:0022834	ligand-gated channel activity	7/390	147/18496	0.0364477	0.286222	0.253329	CHRNA6/GABRP/GRIN2A/HTR3A/KCNJ18/SCNN1B/SCNN1G	7
MF	GO:0034483	heparan sulfate sulfotransferase activity	2/390	15/18496	0.0388499	0.29602	0.262	HS3ST4/HS3ST6	2
MF	GO:0070492	oligosaccharide binding	2/390	15/18496	0.0388499	0.29602	0.262	ITLN1/SELL	2
MF	GO:0046906	tetrapyrrole binding	7/390	151/18496	0.0411803	0.29602	0.262	CYP27A1/CYP2E1/CYP4B1/CYP4F12/CYP4X1/DUOX2/NOS2	7
MF	GO:0015108	chloride transmembrane transporter activity	6/390	120/18496	0.0417255	0.29602	0.262	BEST2/CLCA4/GABRP/OCA2/SLC1A1/SLC26A9	6
MF	GO:0008191	metalloendopeptidase inhibitor activity	2/390	16/18496	0.0437932	0.29602	0.262	SPOCK2/WFIKKN1	2
MF	GO:0008392	arachidonic acid epoxygenase activity	2/390	16/18496	0.0437932	0.29602	0.262	CYP2E1/CYP4F12	2
MF	GO:0034987	immunoglobulin receptor binding	2/390	16/18496	0.0437932	0.29602	0.262	CR2/JCHAIN	2
MF	GO:0045125	bioactive lipid receptor activity	2/390	16/18496	0.0437932	0.29602	0.262	GPR174/S1PR4	2
MF	GO:0050664	oxidoreductase activity, acting on NAD(P)H, oxygen as acceptor	2/390	16/18496	0.0437932	0.29602	0.262	DUOX2/NCF1	2
MF	GO:0070403	NAD+ binding	2/390	16/18496	0.0437932	0.29602	0.262	HPGD/PARP15	2
MF	GO:0140327	flippase activity	2/390	16/18496	0.0437932	0.29602	0.262	ABCA3/ATP10B	2
MF	GO:0005178	integrin binding	7/390	154/18496	0.0449804	0.300244	0.26574	CD177/CD40LG/FCER2/ICAM3/ITGAL/ITGB7/VCAM1	7
MF	GO:0005068	transmembrane receptor protein tyrosine kinase adaptor activity	2/390	17/18496	0.0489552	0.307554	0.272209	STAP1/TRAT1	2
MF	GO:0008242	omega peptidase activity	2/390	17/18496	0.0489552	0.307554	0.272209	ASRGL1/GGT6	2
MF	GO:0008381	mechanosensitive monoatomic ion channel activity	2/390	17/18496	0.0489552	0.307554	0.272209	TMC8/TMEM150C	2
MF	GO:0008525	phosphatidylcholine transporter activity	2/390	17/18496	0.0489552	0.307554	0.272209	ABCA3/ATP10B	2
MF	GO:0047498	calcium-dependent phospholipase A2 activity	2/390	17/18496	0.0489552	0.307554	0.272209	PLA2G2D/PLA2G4D	2

## Sheet: S6
category	subcategory	ID	Description	GeneRatio	BgRatio	pvalue	p.adjust	qvalue	geneID	Count
Human Diseases	Immune disease	hsa05340	Primary immunodeficiency	16/194	38/8840	2.2663e-17	5.59776e-15	5.03357e-15	CD19/CD3D/CD3E/CD40LG/CD79A/CD8A/CD8B/CD8B2/CIITA/IGLL1/IL2RG/LCK/PTPRC/TNFRSF13B/TNFRSF13C/ZAP70	16
Environmental Information Processing	Signaling molecules and interaction	hsa04060	Cytokine-cytokine receptor interaction	28/194	298/8840	5.43146e-11	6.70786e-09	6.03178e-09	CCL19/CCR2/CCR4/CCR5/CCR7/CD27/CD40LG/CSF2RB/CXCL13/CXCL17/CXCR3/CXCR4/CXCR6/FASLG/IFNG/IL17RB/IL19/IL21R/IL2RG/IL34/IL36A/LTA/LTB/TNFRSF13B/TNFRSF13C/TNFRSF17/TNFSF8/XCR1	28
Organismal Systems	Immune system	hsa04640	Hematopoietic cell lineage	16/194	99/8840	3.57042e-10	2.93965e-08	2.64337e-08	CD19/CD2/CD22/CD37/CD3D/CD3E/CD3G/CD5/CD8A/CD8B/CD8B2/CR2/FCER2/FLT3/GP1BA/MS4A1	16
Organismal Systems	Immune system	hsa04660	T cell receptor signaling pathway	17/194	122/8840	1.07498e-09	6.19021e-08	5.56631e-08	CD247/CD28/CD3D/CD3E/CD3G/CD40LG/CD8A/CD8B/CD8B2/GRAP2/IFNG/ITK/LCK/PDCD1/PTPRC/RASGRP1/ZAP70	17
Environmental Information Processing	Signaling molecules and interaction	hsa04514	Cell adhesion molecules	19/194	157/8840	1.25308e-09	6.19021e-08	5.56631e-08	CD2/CD22/CD28/CD40LG/CD6/CD8A/CD8B/CD8B2/CLDN10/CLDN3/ICAM3/ITGAL/ITGB7/PDCD1/PTPRC/SELL/SPN/TIGIT/VCAM1	19
Environmental Information Processing	Signaling molecules and interaction	hsa04061	Viral protein interaction with cytokine and cytokine receptor	13/194	100/8840	2.44619e-07	1.00701e-05	9.05519e-06	CCL19/CCR2/CCR4/CCR5/CCR7/CXCL13/CXCR3/CXCR4/IL19/IL2RG/IL34/LTA/XCR1	13
Human Diseases	Cancer: overview	hsa05235	PD-L1 expression and PD-1 checkpoint pathway in cancer	11/194	90/8840	3.9285e-06	0.00013862	0.000124648	BATF/CD247/CD28/CD3D/CD3E/CD3G/IFNG/LCK/PDCD1/RASGRP1/ZAP70	11
Organismal Systems	Immune system	hsa04062	Chemokine signaling pathway	15/194	193/8840	2.09947e-05	0.00063394	0.000570046	CCL19/CCR2/CCR4/CCR5/CCR7/CXCL13/CXCR3/CXCR4/CXCR6/GNG8/ITK/NCF1/PRKCB/RASGRP2/XCR1	15
Organismal Systems	Immune system	hsa04659	Th17 cell differentiation	11/194	108/8840	2.3099e-05	0.00063394	0.000570046	CD247/CD3D/CD3E/CD3G/IFNG/IL21R/IL2RG/IRF4/LCK/TBX21/ZAP70	11
Organismal Systems	Immune system	hsa04672	Intestinal immune network for IgA production	7/194	49/8840	8.65735e-05	0.00213837	0.00192284	CD28/CD40LG/CXCR4/ITGB7/TNFRSF13B/TNFRSF13C/TNFRSF17	7
Environmental Information Processing	Signal transduction	hsa04064	NF-kappa B signaling pathway	10/194	105/8840	9.70754e-05	0.00217978	0.00196009	BCL2/CCL19/CD40LG/LCK/LTA/LTB/PRKCB/TNFRSF13C/VCAM1/ZAP70	10
Organismal Systems	Immune system	hsa04662	B cell receptor signaling pathway	9/194	91/8840	0.000162745	0.00334984	0.00301222	BANK1/BLK/CD19/CD22/CD79A/CD79B/CR2/LILRA4/PRKCB	9
Organismal Systems	Immune system	hsa04658	Th1 and Th2 cell differentiation	9/194	92/8840	0.000177025	0.00336347	0.00302447	CD247/CD3D/CD3E/CD3G/IFNG/IL2RG/LCK/TBX21/ZAP70	9
Organismal Systems	Immune system	hsa04650	Natural killer cell mediated cytotoxicity	10/194	135/8840	0.000750827	0.0132467	0.0119116	CD247/CD48/FASLG/IFNG/ITGAL/LCK/NCR3/PRKCB/SH2D1A/ZAP70	10
Organismal Systems	Immune system	hsa04670	Leukocyte transendothelial migration	9/194	116/8840	0.000989184	0.0162886	0.0146469	CLDN10/CLDN3/CXCR4/ITGAL/ITK/NCF1/PRKCB/RHOH/VCAM1	9
Metabolism	Glycan biosynthesis and metabolism	hsa00601	Glycosphingolipid biosynthesis - lacto and neolacto series	4/194	28/8840	0.00304735	0.0470435	0.042302	B3GALT5/FUT3/FUT6/FUT7	4
Human Diseases	Infectious disease: parasitic	hsa05144	Malaria	5/194	50/8840	0.00460002	0.0668356	0.0600994	CD40LG/IFNG/ITGAL/KLRB1/VCAM1	5
Environmental Information Processing	Signal transduction	hsa04014	Ras signaling pathway	12/194	238/8840	0.00613147	0.0841374	0.0756573	CALML5/FASLG/FLT3/GNG8/GRIN2A/PLA2G2D/PLA2G4D/PRKCB/RASAL3/RASGRP1/RASGRP2/ZAP70	12
Human Diseases	Infectious disease: viral	hsa05170	Human immunodeficiency virus 1 infection	11/194	213/8840	0.00719562	0.0913834	0.082173	BCL2/CALML5/CCR5/CD247/CD3D/CD3E/CD3G/CXCR4/FASLG/GNG8/PRKCB	11
Human Diseases	Infectious disease: parasitic	hsa05142	Chagas disease	7/194	103/8840	0.00739947	0.0913834	0.082173	CD247/CD3D/CD3E/CD3G/FASLG/IFNG/NOS2	7
Human Diseases	Infectious disease: parasitic	hsa05143	African trypanosomiasis	4/194	37/8840	0.00843362	0.0991955	0.0891977	FASLG/IFNG/PRKCB/VCAM1	4
Organismal Systems	Excretory system	hsa04960	Aldosterone-regulated sodium reabsorption	4/194	38/8840	0.00926733	0.0995231	0.0894923	NR3C2/PRKCB/SCNN1B/SCNN1G	4
Human Diseases	Immune disease	hsa05330	Allograft rejection	4/194	38/8840	0.00926733	0.0995231	0.0894923	CD28/CD40LG/FASLG/IFNG	4
Metabolism	Metabolism of cofactors and vitamins	hsa00770	Pantothenate and CoA biosynthesis	3/194	21/8840	0.0103437	0.103969	0.0934904	UPB1/VNN1/VNN2	3
Metabolism	Lipid metabolism	hsa00590	Arachidonic acid metabolism	5/194	61/8840	0.010648	0.103969	0.0934904	CYP2E1/HPGD/PLA2G2D/PLA2G4D/PTGDS	5
Organismal Systems	Endocrine system	hsa04915	Estrogen signaling pathway	8/194	139/8840	0.0113651	0.103969	0.0934904	BCL2/CALML5/ESR1/KRT13/KRT15/KRT24/KRT33B/KRT36	8
Human Diseases	Infectious disease: viral	hsa05162	Measles	8/194	139/8840	0.0113651	0.103969	0.0934904	BCL2/CD28/CD3D/CD3E/CD3G/FASLG/IL2RG/SLAMF1	8
Human Diseases	Endocrine and metabolic disease	hsa04940	Type I diabetes mellitus	4/194	43/8840	0.0142372	0.125593	0.112934	CD28/FASLG/IFNG/LTA	4
Human Diseases	Infectious disease: bacterial	hsa05150	Staphylococcus aureus infection	6/194	100/8840	0.0224713	0.191393	0.172103	ITGAL/KRT13/KRT15/KRT24/KRT33B/KRT36	6
Metabolism	Lipid metabolism	hsa00565	Ether lipid metabolism	4/194	50/8840	0.0236147	0.194428	0.174832	ENPP6/GDPD3/PLA2G2D/PLA2G4D	4
Metabolism	Lipid metabolism	hsa00591	Linoleic acid metabolism	3/194	30/8840	0.0273505	0.217922	0.195958	CYP2E1/PLA2G2D/PLA2G4D	3
Organismal Systems	Immune system	hsa04612	Antigen processing and presentation	5/194	80/8840	0.0309131	0.238611	0.214561	CD8A/CD8B/CD8B2/CIITA/IFNG	5
Environmental Information Processing	Signal transduction	hsa04066	HIF-1 signaling pathway	6/194	109/8840	0.0325421	0.243573	0.219023	BCL2/IFNG/LDHC/NOS2/PRKCB/TF	6
Human Diseases	Infectious disease: viral	hsa05169	Epstein-Barr virus infection	9/194	203/8840	0.034677	0.247859	0.222878	BCL2/CD19/CD247/CD3D/CD3E/CD3G/CR2/FCER2/ITGAL	9
Human Diseases	Infectious disease: parasitic	hsa05145	Toxoplasmosis	6/194	111/8840	0.0351217	0.247859	0.222878	BCL2/CCR5/CD40LG/CIITA/IFNG/NOS2	6
Metabolism	Metabolism of other amino acids	hsa00430	Taurine and hypotaurine metabolism	2/194	16/8840	0.046991	0.322411	0.289915	FMO3/GGT6	2

## Sheet: S7
ONTOLOGY	ID	Description	GeneRatio	BgRatio	pvalue	p.adjust	qvalue	geneID	Count
BP	GO:0030198	extracellular matrix organization	30/297	321/18870	4.68792e-15	6.46202e-12	4.98978e-12	ADAMTS15/ADAMTS6/CAV1/COL10A1/COL17A1/COL28A1/COL2A1/COL4A6/COL5A3/CTSV/FAP/FLRT2/FOXC2/HAS1/HAS2/IBSP/IL6/LOXL2/MATN3/MMP1/MMP10/MMP13/MMP16/PDPN/PTX3/RXFP1/SMOC1/SULF2/TGFBI/TLL1	30
BP	GO:0043062	extracellular structure organization	30/297	322/18870	5.09793e-15	6.46202e-12	4.98978e-12	ADAMTS15/ADAMTS6/CAV1/COL10A1/COL17A1/COL28A1/COL2A1/COL4A6/COL5A3/CTSV/FAP/FLRT2/FOXC2/HAS1/HAS2/IBSP/IL6/LOXL2/MATN3/MMP1/MMP10/MMP13/MMP16/PDPN/PTX3/RXFP1/SMOC1/SULF2/TGFBI/TLL1	30
BP	GO:0045229	external encapsulating structure organization	30/297	323/18870	5.54204e-15	6.46202e-12	4.98978e-12	ADAMTS15/ADAMTS6/CAV1/COL10A1/COL17A1/COL28A1/COL2A1/COL4A6/COL5A3/CTSV/FAP/FLRT2/FOXC2/HAS1/HAS2/IBSP/IL6/LOXL2/MATN3/MMP1/MMP10/MMP13/MMP16/PDPN/PTX3/RXFP1/SMOC1/SULF2/TGFBI/TLL1	30
BP	GO:0048736	appendage development	20/297	182/18870	1.02771e-11	7.18983e-09	5.55178e-09	ALX4/B4GALNT1/COL2A1/DKK1/EN1/FBN2/FREM2/HOXA11/ITGA6/MYH3/NOG/NPR2/RSPO4/SALL1/SEMA3C/SLC7A11/SMOC1/SP8/TBX5/WNT7A	20
BP	GO:0060173	limb development	20/297	182/18870	1.02771e-11	7.18983e-09	5.55178e-09	ALX4/B4GALNT1/COL2A1/DKK1/EN1/FBN2/FREM2/HOXA11/ITGA6/MYH3/NOG/NPR2/RSPO4/SALL1/SEMA3C/SLC7A11/SMOC1/SP8/TBX5/WNT7A	20
BP	GO:0042060	wound healing	28/297	423/18870	1.63622e-10	9.53918e-08	7.36588e-08	ADRA2C/AJAP1/CAV1/CYP4F11/DCBLD2/F3/FAP/FN1/FOXA2/FOXC2/IL1A/IL6/ITGA5/NOG/NPR2/NRG1/PDPN/PLAU/PROC/SERPINE1/SERPINE2/SLC7A11/SYT7/TFPI2/THBS1/TNFRSF12A/WNT7A/YAP1	28
BP	GO:0060485	mesenchyme development	23/297	327/18870	2.37693e-09	1.18779e-06	9.17175e-07	ACTG2/BASP1/CDH2/DKK1/FGF19/FN1/FOXA2/FOXC2/GDNF/HAS2/HMGA2/IL6/LOXL2/NCAM1/NOG/NRG1/PDPN/SEMA3A/SEMA3C/SNAI2/TBX5/WNT11/YAP1	23
BP	GO:0007389	pattern specification process	27/297	475/18870	9.51837e-09	3.44647e-06	2.66126e-06	ALX4/BARX1/BASP1/DKK1/DNAH5/EN1/FOXA2/FOXC2/FST/GDNF/GLI1/GLI2/HOXA11/HOXB8/IRX1/LHX1/LMX1B/NKD1/NOG/RFX8/SEMA3C/SIX3/SP8/TBX5/TLL1/WNT11/WNT7A	27
BP	GO:0035107	appendage morphogenesis	15/297	146/18870	1.05641e-08	3.44647e-06	2.66126e-06	ALX4/COL2A1/DKK1/EN1/FBN2/FREM2/HOXA11/MYH3/NOG/NPR2/SALL1/SEMA3C/SP8/TBX5/WNT7A	15
BP	GO:0035108	limb morphogenesis	15/297	146/18870	1.05641e-08	3.44647e-06	2.66126e-06	ALX4/COL2A1/DKK1/EN1/FBN2/FREM2/HOXA11/MYH3/NOG/NPR2/SALL1/SEMA3C/SP8/TBX5/WNT7A	15
BP	GO:0034329	cell junction assembly	26/297	446/18870	1.0838e-08	3.44647e-06	2.66126e-06	ACTN1/ADD2/AMIGO2/CAV1/CDH13/CDH2/CLDN6/COL17A1/CORO2B/DKK1/DNER/DSCAM/FLRT2/FN1/GAP43/ITGA5/ITGA6/LAMA3/SHANK2/SLITRK6/SNAI2/ST8SIA2/TBX5/THBS1/WNT11/WNT7A	26
BP	GO:0048568	embryonic organ development	26/297	453/18870	1.48936e-08	4.34149e-06	3.35237e-06	ALX4/CHRNA9/COL2A1/CSF2/EGFR/EN1/FBN2/FOXC2/FOXL2/GDNF/GLI1/GLI2/HOXA11/HOXB8/LHX1/LIF/MFAP5/MMP16/NOG/SALL1/SCT/SIX3/SLITRK6/TH/WNT11/YAP1	26
BP	GO:0003002	regionalization	25/297	430/18870	2.21747e-08	5.9667e-06	4.60731e-06	ALX4/BARX1/BASP1/DKK1/DNAH5/EN1/FOXA2/FOXC2/GDNF/GLI1/GLI2/HOXA11/HOXB8/IRX1/LHX1/LMX1B/NKD1/NOG/RFX8/SEMA3C/SIX3/SP8/TLL1/WNT11/WNT7A	25
BP	GO:0072006	nephron development	15/297	156/18870	2.60372e-08	6.50558e-06	5.02341e-06	BASP1/FOXC2/GDNF/HOXA11/IRX1/ITGA3/LHX1/LIF/NOG/SALL1/SLC22A1/SULF2/TMEM59L/WNT11/YAP1	15
BP	GO:0001822	kidney development	21/297	314/18870	2.89501e-08	6.75115e-06	5.21304e-06	ADAMTS6/BASP1/EFNB2/FOXC2/FREM2/GDF6/GDNF/GLI2/HAS2/HOXA11/IRX1/ITGA3/LHX1/LIF/NOG/SALL1/SLC22A1/SULF2/TMEM59L/WNT11/YAP1	21
BP	GO:2001236	regulation of extrinsic apoptotic signaling pathway	15/297	158/18870	3.09232e-08	6.76058e-06	5.22032e-06	CAV1/COL2A1/CSF2/GDNF/IL1A/INHBA/ITGA6/SCG2/SERPINE1/SNAI2/SRPX/THBS1/TIMP3/TNFRSF12A/YAP1	15
BP	GO:0048762	mesenchymal cell differentiation	19/297	262/18870	3.738e-08	7.63619e-06	5.89644e-06	CDH2/FGF19/FN1/FOXA2/FOXC2/GDNF/HAS2/HMGA2/IL6/LOXL2/NCAM1/NOG/NRG1/PDPN/SEMA3A/SEMA3C/SNAI2/TBX5/WNT11	19
BP	GO:0009953	dorsal/ventral pattern formation	12/297	97/18870	4.00704e-08	7.63619e-06	5.89644e-06	EN1/GLI1/GLI2/HOXA11/LHX1/LMX1B/NOG/RFX8/SIX3/SP8/TLL1/WNT7A	12
BP	GO:0001503	ossification	25/297	444/18870	4.14773e-08	7.63619e-06	5.89644e-06	AREG/COL2A1/DKK1/EGFR/FBN2/FOXC2/FSTL3/GDPD2/GLI1/GLI2/IBSP/IL6/MMP13/MMP16/MN1/MYOG/NOG/NPR2/PTHLH/SMOC1/SNAI2/TNC/VEGFC/WNT11/YAP1	25
BP	GO:0072001	renal system development	21/297	324/18870	4.96067e-08	8.67621e-06	6.69951e-06	ADAMTS6/BASP1/EFNB2/FOXC2/FREM2/GDF6/GDNF/GLI2/HAS2/HOXA11/IRX1/ITGA3/LHX1/LIF/NOG/SALL1/SLC22A1/SULF2/TMEM59L/WNT11/YAP1	21
BP	GO:0072009	nephron epithelium development	13/297	120/18870	5.44339e-08	9.06713e-06	7.00137e-06	BASP1/FOXC2/GDNF/HOXA11/IRX1/LHX1/LIF/NOG/SALL1/SLC22A1/TMEM59L/WNT11/YAP1	13
BP	GO:0055123	digestive system development	14/297	146/18870	7.90938e-08	1.25759e-05	9.71075e-06	ALX4/BARX1/DACT1/EGFR/FOXL1/GLI1/GLI2/NPR2/PDGFC/SALL1/SCT/SFRP5/WNT11/YAP1	14
BP	GO:0030111	regulation of Wnt signaling pathway	21/297	338/18870	1.01752e-07	1.54752e-05	1.19495e-05	APCDD1L/BARX1/CAV1/CDH2/DACT1/DKK1/DKK3/EGFR/FOXL1/GLI1/HECW1/ITGA3/NKD1/NOG/RSPO4/SALL1/SFRP5/SNAI2/SULF2/WNT11/YAP1	21
BP	GO:0072073	kidney epithelium development	14/297	150/18870	1.11106e-07	1.61936e-05	1.25042e-05	BASP1/EFNB2/FOXC2/GDNF/HOXA11/IRX1/LHX1/LIF/NOG/SALL1/SLC22A1/TMEM59L/WNT11/YAP1	14
BP	GO:0001704	formation of primary germ layer	13/297	128/18870	1.17601e-07	1.64547e-05	1.27058e-05	DKK1/FN1/FOXC2/HMGA2/HOXA11/INHBA/ITGA3/ITGA5/LAMA3/LAMB3/LHX1/NOG/WNT11	13
BP	GO:0097191	extrinsic apoptotic signaling pathway	17/297	229/18870	1.41346e-07	1.90165e-05	1.4684e-05	CAV1/COL2A1/CSF2/GDNF/IL1A/INHBA/ITGA6/MLLT11/NGF/SCG2/SERPINE1/SNAI2/SRPX/THBS1/TIMP3/TNFRSF12A/YAP1	17
BP	GO:0050673	epithelial cell proliferation	25/297	480/18870	1.84617e-07	2.39182e-05	1.84689e-05	APLN/AREG/CAV1/CDH13/EFNB2/EGFR/F3/FAP/FST/GLI1/HAS2/IL6/LOXL2/NKX2-8/NKX6-1/NOG/PTPRN/SCG2/SCN5A/SNAI2/SULF2/THBS1/VEGFC/WNT7A/YAP1	25
BP	GO:0048565	digestive tract development	13/297	134/18870	2.01904e-07	2.52235e-05	1.94769e-05	ALX4/DACT1/EGFR/FOXL1/GLI1/GLI2/NPR2/PDGFC/SALL1/SCT/SFRP5/WNT11/YAP1	13
BP	GO:0001656	metanephros development	11/297	94/18870	2.64463e-07	3.18997e-05	2.4632e-05	BASP1/FOXC2/GDF6/GDNF/HOXA11/IRX1/LHX1/LIF/SALL1/SLC22A1/YAP1	11
BP	GO:0001706	endoderm formation	9/297	58/18870	2.84486e-07	3.31711e-05	2.56137e-05	DKK1/FN1/HMGA2/INHBA/ITGA5/LAMA3/LAMB3/LHX1/NOG	9
BP	GO:0060541	respiratory system development	16/297	214/18870	3.00702e-07	3.39308e-05	2.62004e-05	BASP1/CCBE1/GLI1/GLI2/ITGA3/LIF/MSC/NKX2-8/NOG/PDPN/RXFP1/SLC7A11/TBX5/TNC/WNT11/YAP1	16
BP	GO:0048608	reproductive structure development	19/297	305/18870	4.02193e-07	4.39647e-05	3.39483e-05	BASP1/FOXL2/FST/GLI1/HOXA11/IL1A/INHBA/LHB/LHX1/NOG/NPR2/PTPRN/PTX3/SALL1/SERPINE2/TNC/VGF/WNT7A/ZFP42	19
BP	GO:0030326	embryonic limb morphogenesis	12/297	120/18870	4.29577e-07	4.41959e-05	3.41267e-05	ALX4/DKK1/EN1/FBN2/FREM2/HOXA11/MYH3/NOG/SALL1/SP8/TBX5/WNT7A	12
BP	GO:0035113	embryonic appendage morphogenesis	12/297	120/18870	4.29577e-07	4.41959e-05	3.41267e-05	ALX4/DKK1/EN1/FBN2/FREM2/HOXA11/MYH3/NOG/SALL1/SP8/TBX5/WNT7A	12
BP	GO:0061458	reproductive system development	19/297	309/18870	4.90545e-07	4.84874e-05	3.74405e-05	BASP1/FOXL2/FST/GLI1/HOXA11/IL1A/INHBA/LHB/LHX1/NOG/NPR2/PTPRN/PTX3/SALL1/SERPINE2/TNC/VGF/WNT7A/ZFP42	19
BP	GO:0072080	nephron tubule development	11/297	100/18870	4.99012e-07	4.84874e-05	3.74405e-05	GDNF/HOXA11/IRX1/LHX1/LIF/NOG/SALL1/SLC22A1/TMEM59L/WNT11/YAP1	11
BP	GO:0007369	gastrulation	15/297	197/18870	5.6145e-07	5.30798e-05	4.09866e-05	APLN/DKK1/FN1/FOXA2/FOXC2/HMGA2/HOXA11/INHBA/ITGA3/ITGA5/LAMA3/LAMB3/LHX1/NOG/WNT11	15
BP	GO:0048732	gland development	23/297	443/18870	6.14356e-07	5.65531e-05	4.36686e-05	APLN/AREG/CAV1/DKK3/EGFR/FOXI3/GLI1/GLI2/HOXA11/IL6/MAD1L1/NKX2-8/NOG/NRG1/RXFP1/SALL1/SEMA3C/SERPINE2/SIX3/SNAI2/SULF2/TNC/WNT11	23
BP	GO:0030178	negative regulation of Wnt signaling pathway	14/297	173/18870	6.45345e-07	5.78825e-05	4.46952e-05	APCDD1L/BARX1/CAV1/CDH2/DACT1/DKK1/DKK3/GLI1/HECW1/NKD1/NOG/SFRP5/SNAI2/WNT11	14
BP	GO:0061326	renal tubule development	11/297	104/18870	7.43296e-07	6.50012e-05	5.0192e-05	GDNF/HOXA11/IRX1/LHX1/LIF/NOG/SALL1/SLC22A1/TMEM59L/WNT11/YAP1	11
BP	GO:0009914	hormone transport	19/297	319/18870	7.94237e-07	6.7762e-05	5.23238e-05	ANO1/CHGA/FOXA2/FOXL2/GAL/GRP/IL11/IL6/INHBA/KISS1/LIF/NKX6-1/PTPRN/SCG5/SCT/SLC16A2/SLC7A8/SYT7/VGF	19
BP	GO:0009954	proximal/distal pattern formation	7/297	34/18870	8.33188e-07	6.93927e-05	5.3583e-05	EN1/GLI1/GLI2/HOXA11/IRX1/SIX3/SP8	7
BP	GO:0051216	cartilage development	15/297	207/18870	1.05312e-06	8.56702e-05	6.6152e-05	COL2A1/GDF6/HMGA2/HOXA11/LOXL2/MATN3/MMP13/NOG/NPR2/PTHLH/SNAI2/SULF2/TGFBI/WNT11/WNT7A	15
BP	GO:0048562	embryonic organ morphogenesis	18/297	295/18870	1.10121e-06	8.7546e-05	6.76004e-05	ALX4/CHRNA9/COL2A1/FBN2/FOXC2/FOXL2/GLI1/HOXA11/HOXB8/LHX1/MFAP5/MMP16/NOG/SIX3/SLITRK6/TH/WNT11/YAP1	18
BP	GO:0030193	regulation of blood coagulation	9/297	68/18870	1.14725e-06	8.91799e-05	6.88621e-05	CAV1/F3/FAP/FOXA2/PLAU/PROC/SERPINE1/SERPINE2/THBS1	9
BP	GO:0048864	stem cell development	10/297	88/18870	1.22567e-06	9.32039e-05	7.19693e-05	CDH2/FGF19/FN1/FOXC2/GDNF/NRG1/SEMA3A/SEMA3C/SNAI2/WNT7A	10
BP	GO:0021696	cerebellar cortex morphogenesis	7/297	36/18870	1.25849e-06	9.36641e-05	7.23247e-05	GLI1/GLI2/LHX1/LHX5/SERPINE2/WNT7A/ZNF365	7
BP	GO:0061041	regulation of wound healing	12/297	133/18870	1.30332e-06	9.49795e-05	7.33404e-05	AJAP1/CAV1/F3/FAP/FOXA2/FOXC2/PLAU/PROC/SERPINE1/SERPINE2/THBS1/TNFRSF12A	12
BP	GO:1900046	regulation of hemostasis	9/297	70/18870	1.47292e-06	0.000104227	8.04814e-05	CAV1/F3/FAP/FOXA2/PLAU/PROC/SERPINE1/SERPINE2/THBS1	9
BP	GO:0050878	regulation of body fluid levels	20/297	365/18870	1.48982e-06	0.000104227	8.04814e-05	ADRA2C/ANO1/APLN/CAV1/CORO2B/CYP4F11/F3/FAP/FOXA2/HAS2/IL6/PDPN/PLAU/PROC/SCT/SERPINE1/SERPINE2/SLC7A11/TFPI2/THBS1	20
BP	GO:0060560	developmental growth involved in morphogenesis	16/297	244/18870	1.72755e-06	0.000117717	9.08974e-05	AREG/DSCAM/FN1/L1CAM/LHX1/NGF/NKD1/NKX6-1/NPR2/SALL1/SEMA3A/SEMA3C/ST8SIA2/TNC/WNT11/YAP1	16
BP	GO:0030324	lung development	14/297	188/18870	1.74993e-06	0.000117717	9.08974e-05	CCBE1/GLI1/GLI2/ITGA3/LIF/NKX2-8/NOG/PDPN/RXFP1/SLC7A11/TBX5/TNC/WNT11/YAP1	14
BP	GO:0046879	hormone secretion	18/297	308/18870	2.03768e-06	0.000132177	0.000102063	ANO1/CHGA/FOXA2/FOXL2/GAL/GRP/IL11/IL6/INHBA/KISS1/LIF/NKX6-1/PTPRN/SCG5/SCT/SLC16A2/SYT7/VGF	18
BP	GO:0035270	endocrine system development	12/297	139/18870	2.08197e-06	0.000132177	0.000102063	CDH2/DKK3/FOXA2/FOXI3/GLI1/GLI2/IL6/NKX6-1/NOG/SALL1/SIX3/WNT11	12
BP	GO:0050818	regulation of coagulation	9/297	73/18870	2.10993e-06	0.000132177	0.000102063	CAV1/F3/FAP/FOXA2/PLAU/PROC/SERPINE1/SERPINE2/THBS1	9
BP	GO:0030900	forebrain development	21/297	407/18870	2.11604e-06	0.000132177	0.000102063	CDH2/DKK1/DNAH5/EGFR/FEZ1/GLI1/GLI2/IGF2BP1/INHBA/LHX1/LHX5/NEFL/NOG/SALL1/SCN5A/SCT/SEMA3A/SIX3/SLC7A11/TH/WNT7A	21
BP	GO:0002062	chondrocyte differentiation	11/297	116/18870	2.21671e-06	0.000133136	0.000102804	COL2A1/GDF6/HMGA2/HOXA11/LOXL2/NPR2/PTHLH/SNAI2/SULF2/TGFBI/WNT7A	11
BP	GO:0030323	respiratory tube development	14/297	192/18870	2.24507e-06	0.000133136	0.000102804	CCBE1/GLI1/GLI2/ITGA3/LIF/NKX2-8/NOG/PDPN/RXFP1/SLC7A11/TBX5/TNC/WNT11/YAP1	14
BP	GO:0090090	negative regulation of canonical Wnt signaling pathway	12/297	140/18870	2.24558e-06	0.000133136	0.000102804	CAV1/CDH2/DACT1/DKK1/DKK3/GLI1/HECW1/NKD1/NOG/SFRP5/SNAI2/WNT11	12
BP	GO:0007409	axonogenesis	22/297	448/18870	2.70417e-06	0.000157653	0.000121735	CDH2/DSCAM/EFNB2/FEZ1/FLRT2/FN1/GAP43/GDNF/GLI2/L1CAM/LHX1/NCAM1/NEFL/NGF/NKX2-8/NKX6-1/NOG/NPR2/SEMA3A/SEMA3C/SLITRK6/WNT7A	22
BP	GO:0023061	signal release	23/297	484/18870	2.76989e-06	0.000158837	0.000122649	ADRA2C/ANO1/CHGA/FOXA2/FOXL2/GAL/GDNF/GRP/IL11/IL1A/IL6/INHBA/KISS1/LIF/NKX6-1/PTPRN/SCG5/SCT/SLC16A2/SYT13/SYT7/VGF/WNT7A	23
BP	GO:0007596	blood coagulation	15/297	224/18870	2.82001e-06	0.000159103	0.000122855	ADRA2C/CAV1/CYP4F11/F3/FAP/FOXA2/IL6/PDPN/PLAU/PROC/SERPINE1/SERPINE2/SLC7A11/TFPI2/THBS1	15
BP	GO:0061448	connective tissue development	17/297	285/18870	2.98647e-06	0.00016582	0.000128042	COL2A1/FOXC2/GDF6/HMGA2/HOXA11/LOXL2/MATN3/MMP13/NOG/NPR2/PTHLH/RXFP1/SNAI2/SULF2/TGFBI/WNT11/WNT7A	17
BP	GO:0060993	kidney morphogenesis	10/297	98/18870	3.31165e-06	0.000181002	0.000139765	BASP1/GDNF/HOXA11/IRX1/LHX1/LIF/NOG/SALL1/TMEM59L/WNT11	10
BP	GO:2001237	negative regulation of extrinsic apoptotic signaling pathway	10/297	99/18870	3.63314e-06	0.000192945	0.000148987	COL2A1/CSF2/GDNF/IL1A/ITGA6/SCG2/SERPINE1/SNAI2/THBS1/YAP1	10
BP	GO:0022612	gland morphogenesis	11/297	122/18870	3.64048e-06	0.000192945	0.000148987	AREG/CAV1/EGFR/GLI1/IL6/NOG/RXFP1/SEMA3C/SNAI2/SULF2/TNC	11
BP	GO:0050817	coagulation	15/297	229/18870	3.69962e-06	0.000193153	0.000149147	ADRA2C/CAV1/CYP4F11/F3/FAP/FOXA2/IL6/PDPN/PLAU/PROC/SERPINE1/SERPINE2/SLC7A11/TFPI2/THBS1	15
BP	GO:0016055	Wnt signaling pathway	22/297	459/18870	3.9973e-06	0.000205626	0.000158778	APCDD1L/BARX1/CAV1/CDH2/DACT1/DKK1/DKK3/EGFR/FOXL1/GLI1/HECW1/ITGA3/NKD1/NOG/RSPO4/SALL1/SFRP5/SNAI2/SULF2/WNT11/WNT7A/YAP1	22
BP	GO:0007599	hemostasis	15/297	231/18870	4.11516e-06	0.000205832	0.000158937	ADRA2C/CAV1/CYP4F11/F3/FAP/FOXA2/IL6/PDPN/PLAU/PROC/SERPINE1/SERPINE2/SLC7A11/TFPI2/THBS1	15
BP	GO:0072088	nephron epithelium morphogenesis	9/297	79/18870	4.119e-06	0.000205832	0.000158937	GDNF/HOXA11/IRX1/LHX1/LIF/NOG/SALL1/TMEM59L/WNT11	9
BP	GO:0198738	cell-cell signaling by wnt	22/297	461/18870	4.28549e-06	0.000211136	0.000163033	APCDD1L/BARX1/CAV1/CDH2/DACT1/DKK1/DKK3/EGFR/FOXL1/GLI1/HECW1/ITGA3/NKD1/NOG/RSPO4/SALL1/SFRP5/SNAI2/SULF2/WNT11/WNT7A/YAP1	22
BP	GO:2000027	regulation of animal organ morphogenesis	11/297	126/18870	4.98562e-06	0.000242218	0.000187034	AJAP1/DACT1/DKK1/GDNF/HOXA11/LHX1/NKD1/NOG/SNAI2/WNT11/WNT7A	11
BP	GO:0072028	nephron morphogenesis	9/297	81/18870	5.07978e-06	0.000243412	0.000187956	GDNF/HOXA11/IRX1/LHX1/LIF/NOG/SALL1/TMEM59L/WNT11	9
BP	GO:0021587	cerebellum morphogenesis	7/297	44/18870	5.18725e-06	0.000245203	0.000189338	GLI1/GLI2/LHX1/LHX5/SERPINE2/WNT7A/ZNF365	7
BP	GO:0022617	extracellular matrix disassembly	8/297	62/18870	5.54405e-06	0.000258575	0.000199664	ADAMTS15/CTSV/FAP/IL6/MMP1/MMP10/MMP13/PDPN	8
BP	GO:0014032	neural crest cell development	9/297	82/18870	5.62823e-06	0.000259047	0.000200028	CDH2/FGF19/FN1/FOXC2/GDNF/NRG1/SEMA3A/SEMA3C/SNAI2	9
BP	GO:0048880	sensory system development	20/297	401/18870	6.1679e-06	0.000275707	0.000212893	BCAR3/DIO3/DSCAM/EGFR/FBN2/FOXC2/FOXL2/FREM2/INHBA/LHX1/MFAP5/NKD1/SEMA3A/SIX3/SLC7A11/SLITRK6/SMOC1/TENM3/TH/WNT7A	20
BP	GO:0007160	cell-matrix adhesion	15/297	239/18870	6.2259e-06	0.000275707	0.000212893	ACTN1/AJAP1/CDH13/COL17A1/COL5A3/CORO2B/FN1/ITGA3/ITGA5/ITGA6/L1CAM/PLAU/SERPINE1/SGCE/THBS1	15
BP	GO:0007492	endoderm development	9/297	83/18870	6.22666e-06	0.000275707	0.000212893	DKK1/FN1/HMGA2/INHBA/ITGA5/LAMA3/LAMB3/LHX1/NOG	9
BP	GO:2001239	regulation of extrinsic apoptotic signaling pathway in absence of ligand	7/297	46/18870	7.05302e-06	0.000308393	0.000238132	COL2A1/CSF2/GDNF/IL1A/INHBA/SNAI2/SRPX	7
BP	GO:0001945	lymph vessel development	6/297	31/18870	7.64053e-06	0.000327674	0.000253021	CCBE1/EFNB2/FOXC2/NPR2/PDPN/VEGFC	6
BP	GO:0050678	regulation of epithelial cell proliferation	20/297	407/18870	7.68133e-06	0.000327674	0.000253021	APLN/AREG/CAV1/CDH13/EFNB2/EGFR/F3/GLI1/HAS2/NKX2-8/NOG/PTPRN/SCG2/SCN5A/SNAI2/SULF2/THBS1/VEGFC/WNT7A/YAP1	20
BP	GO:0021575	hindbrain morphogenesis	7/297	47/18870	8.1766e-06	0.000340497	0.000262922	GLI1/GLI2/LHX1/LHX5/SERPINE2/WNT7A/ZNF365	7
BP	GO:0035850	epithelial cell differentiation involved in kidney development	7/297	47/18870	8.1766e-06	0.000340497	0.000262922	BASP1/FOXC2/GDNF/LHX1/LIF/SALL1/YAP1	7
BP	GO:0021537	telencephalon development	16/297	276/18870	8.38944e-06	0.00034525	0.000266592	CDH2/DNAH5/EGFR/FEZ1/IGF2BP1/INHBA/LHX1/LHX5/NEFL/SALL1/SCN5A/SCT/SEMA3A/SIX3/SLC7A11/TH	16
BP	GO:0061138	morphogenesis of a branching epithelium	13/297	187/18870	8.70814e-06	0.000354198	0.000273502	AREG/FOXC2/GDNF/GLI2/HOXA11/LHX1/NOG/SALL1/SEMA3C/SNAI2/TMEM59L/TNC/YAP1	13
BP	GO:0048863	stem cell differentiation	15/297	246/18870	8.81392e-06	0.00035438	0.000273642	CDH2/FGF19/FN1/FOXC2/GDNF/HMGA2/LIF/NOG/NRG1/SEMA3A/SEMA3C/SNAI2/TBX5/WNT7A/YAP1	15
BP	GO:0030903	notochord development	5/297	19/18870	9.06143e-06	0.000360192	0.00027813	COL2A1/GLI1/NOG/WNT11/YAP1	5
BP	GO:0035987	endodermal cell differentiation	7/297	49/18870	1.08718e-05	0.000422549	0.00032628	DKK1/FN1/HMGA2/INHBA/ITGA5/LAMA3/LAMB3	7
BP	GO:0048546	digestive tract morphogenesis	7/297	49/18870	1.08718e-05	0.000422549	0.00032628	DACT1/EGFR/GLI1/GLI2/NPR2/SFRP5/WNT11	7
BP	GO:0046883	regulation of hormone secretion	15/297	251/18870	1.12089e-05	0.000430866	0.000332702	ANO1/CHGA/FOXA2/FOXL2/GAL/GRP/IL11/IL6/INHBA/KISS1/LIF/NKX6-1/SCG5/SCT/SYT7	15
BP	GO:0008544	epidermis development	19/297	385/18870	1.22471e-05	0.000465655	0.000359565	ALX4/COL17A1/DKK1/EGFR/FOXI3/FST/GAL/GLI1/GLI2/GSDME/IL1A/INHBA/LAMA3/LAMB3/LAMC2/PTHLH/SLITRK6/YAP1/ZBED2	19
BP	GO:0048333	mesodermal cell differentiation	6/297	34/18870	1.34134e-05	0.000504517	0.000389573	DKK1/FOXC2/HMGA2/HOXA11/INHBA/ITGA3	6
BP	GO:0021695	cerebellar cortex development	7/297	51/18870	1.42642e-05	0.000530809	0.000409875	GLI1/GLI2/LHX1/LHX5/SERPINE2/WNT7A/ZNF365	7
BP	GO:0001649	osteoblast differentiation	15/297	257/18870	1.48334e-05	0.00054618	0.000421744	AREG/FBN2/GDPD2/GLI1/GLI2/IBSP/IL6/NOG/PTHLH/SMOC1/SNAI2/TNC/VEGFC/WNT11/YAP1	15
BP	GO:0031589	cell-substrate adhesion	18/297	356/18870	1.50373e-05	0.000547923	0.00042309	ACTN1/AJAP1/CDH13/COL17A1/COL5A3/CORO2B/FN1/HAS2/ITGA3/ITGA5/ITGA6/L1CAM/PDPN/PLAU/SERPINE1/SGCE/SPOCK1/THBS1	18
BP	GO:0001654	eye development	19/297	391/18870	1.52015e-05	0.000548194	0.000423299	BCAR3/DIO3/DSCAM/EGFR/FBN2/FOXC2/FOXL2/FREM2/INHBA/LHX1/MFAP5/NKD1/SIX3/SLC7A11/SLITRK6/SMOC1/TENM3/TH/WNT7A	19
BP	GO:0051962	positive regulation of nervous system development	16/297	290/18870	1.55384e-05	0.000554625	0.000428265	AMIGO2/DSCAM/FLRT2/FN1/IL6/L1CAM/LIF/NEFL/NGF/NKX6-1/SERPINE2/SLITRK6/ST8SIA2/VEGFC/WNT7A/ZNF365	16
BP	GO:0051960	regulation of nervous system development	21/297	466/18870	1.68686e-05	0.000596024	0.000460232	AMIGO2/DKK1/DSCAM/FLRT2/FN1/IL6/L1CAM/LIF/NEFL/NGF/NKX6-1/NOG/SEMA3A/SEMA3C/SERPINE2/SLITRK6/ST8SIA2/VEGFC/WNT7A/YAP1/ZNF365	21
BP	GO:0150063	visual system development	19/297	395/18870	1.75114e-05	0.000608825	0.000470116	BCAR3/DIO3/DSCAM/EGFR/FBN2/FOXC2/FOXL2/FREM2/INHBA/LHX1/MFAP5/NKD1/SIX3/SLC7A11/SLITRK6/SMOC1/TENM3/TH/WNT7A	19
BP	GO:0030856	regulation of epithelial cell differentiation	12/297	171/18870	1.7579e-05	0.000608825	0.000470116	AJAP1/CAV1/FST/GDNF/IL1A/LHX1/LIF/NKX6-1/PROC/SERPINE1/YAP1/ZBED2	12
BP	GO:0007157	heterophilic cell-cell adhesion via plasma membrane cell adhesion molecules	7/297	53/18870	1.84879e-05	0.000632043	0.000488045	AMIGO2/CDH2/ITGA5/PSG5/SCARF2/TENM2/TENM3	7
BP	GO:0060828	regulation of canonical Wnt signaling pathway	15/297	262/18870	1.86108e-05	0.000632043	0.000488045	CAV1/CDH2/DACT1/DKK1/DKK3/EGFR/GLI1/HECW1/NKD1/NOG/SFRP5/SNAI2/SULF2/WNT11/YAP1	15
BP	GO:0014033	neural crest cell differentiation	9/297	95/18870	1.88797e-05	0.000635012	0.000490337	CDH2/FGF19/FN1/FOXC2/GDNF/NRG1/SEMA3A/SEMA3C/SNAI2	9
BP	GO:1903034	regulation of response to wounding	12/297	173/18870	1.97478e-05	0.000657882	0.000507997	AJAP1/CAV1/F3/FAP/FOXA2/FOXC2/PLAU/PROC/SERPINE1/SERPINE2/THBS1/TNFRSF12A	12
BP	GO:0001763	morphogenesis of a branching structure	13/297	203/18870	2.09487e-05	0.000691308	0.000533807	AREG/FOXC2/GDNF/GLI2/HOXA11/LHX1/NOG/SALL1/SEMA3C/SNAI2/TMEM59L/TNC/YAP1	13
BP	GO:0043410	positive regulation of MAPK cascade	21/297	474/18870	2.17067e-05	0.000709626	0.000547953	ADRA2C/BCAR3/CDH2/CSPG4/DKK1/EGFR/FGF19/GDF6/GSDME/IL11/IL1A/IL6/INHBA/KISS1/LIF/NECAB2/NRG1/PDGFC/SEMA3A/THBS1/WNT7A	21
BP	GO:0021675	nerve development	9/297	97/18870	2.23424e-05	0.000723645	0.000558777	B4GALNT1/CNGB1/NGF/NPR2/SALL1/SEMA3A/SERPINE2/SLITRK6/SULF2	9
BP	GO:0001707	mesoderm formation	8/297	75/18870	2.31812e-05	0.000743925	0.000574437	DKK1/FOXC2/HMGA2/HOXA11/INHBA/ITGA3/NOG/WNT11	8
BP	GO:0001657	ureteric bud development	9/297	98/18870	2.42668e-05	0.000771685	0.000595873	BASP1/FOXC2/GDNF/HOXA11/LHX1/NOG/SALL1/TMEM59L/WNT11	9
BP	GO:0071774	response to fibroblast growth factor	10/297	123/18870	2.51124e-05	0.000791379	0.000611079	APLN/FGF19/FGF5/FLRT2/LHX1/NOG/NPR2/SULF2/THBS1/TNC	10
BP	GO:0051937	catecholamine transport	8/297	76/18870	2.55589e-05	0.000798258	0.000616391	ADRA2C/CHGA/GDNF/SLC22A1/SLC22A3/SLC6A2/SYT13/SYT7	8
BP	GO:0072163	mesonephric epithelium development	9/297	99/18870	2.63302e-05	0.000807921	0.000623853	BASP1/FOXC2/GDNF/HOXA11/LHX1/NOG/SALL1/TMEM59L/WNT11	9
BP	GO:0072164	mesonephric tubule development	9/297	99/18870	2.63302e-05	0.000807921	0.000623853	BASP1/FOXC2/GDNF/HOXA11/LHX1/NOG/SALL1/TMEM59L/WNT11	9
BP	GO:0048332	mesoderm morphogenesis	8/297	77/18870	2.81374e-05	0.000848489	0.000655179	DKK1/FOXC2/HMGA2/HOXA11/INHBA/ITGA3/NOG/WNT11	8
BP	GO:0072078	nephron tubule morphogenesis	8/297	77/18870	2.81374e-05	0.000848489	0.000655179	GDNF/HOXA11/IRX1/LHX1/NOG/SALL1/TMEM59L/WNT11	8
BP	GO:0050808	synapse organization	21/297	483/18870	2.86129e-05	0.000855453	0.000660555	ACTN1/ADD2/AMIGO2/CDH2/DKK1/DNER/DSCAM/FLRT2/GAP43/GDNF/ITGA3/KIF1A/L1CAM/NEFL/SHANK2/SLC7A11/SLITRK6/ST8SIA2/TNC/WNT7A/ZNF365	21
BP	GO:0061005	cell differentiation involved in kidney development	7/297	57/18870	3.00525e-05	0.000890877	0.000687909	BASP1/FOXC2/GDNF/LHX1/LIF/SALL1/YAP1	7
BP	GO:0007611	learning or memory	15/297	274/18870	3.13472e-05	0.00092145	0.000711516	BCHE/CAMK2N1/DKK1/EGFR/EN1/ITGA3/ITGA5/JPH3/LRRN4/NGF/NOG/NTSR1/SHANK2/SLC7A11/TH	15
BP	GO:0048706	embryonic skeletal system development	10/297	128/18870	3.54422e-05	0.0010274	0.000793332	ALX4/COL2A1/FOXC2/HOXA11/HOXB8/LHX1/MMP16/NOG/SULF2/WNT11	10
BP	GO:0090596	sensory organ morphogenesis	15/297	277/18870	3.55392e-05	0.0010274	0.000793332	BCAR3/CHRNA9/COL2A1/DIO3/DSCAM/FBN2/FOXL2/LHX1/MFAP5/NKD1/NOG/SIX3/SLITRK6/TENM3/TH	15
BP	GO:0001823	mesonephros development	9/297	103/18870	3.61388e-05	0.00103618	0.000800106	BASP1/FOXC2/GDNF/HOXA11/LHX1/NOG/SALL1/TMEM59L/WNT11	9
BP	GO:0051899	membrane depolarization	8/297	80/18870	3.7215e-05	0.00105643	0.000815747	CAV1/CHRNA9/CNGB1/MLLT11/NTSR1/SCN4B/SCN5A/TBX5	8
BP	GO:0048754	branching morphogenesis of an epithelial tube	11/297	156/18870	3.76314e-05	0.00105643	0.000815747	AREG/FOXC2/GDNF/GLI2/HOXA11/LHX1/NOG/SALL1/TMEM59L/TNC/YAP1	11
BP	GO:0043616	keratinocyte proliferation	7/297	59/18870	3.77514e-05	0.00105643	0.000815747	AREG/CDH13/EFNB2/FST/HAS2/SNAI2/YAP1	7
BP	GO:0021549	cerebellum development	9/297	104/18870	3.90244e-05	0.00108339	0.000836563	EN1/GLI1/GLI2/LHX1/LHX5/SCN5A/SERPINE2/WNT7A/ZNF365	9
BP	GO:0061333	renal tubule morphogenesis	8/297	81/18870	4.07366e-05	0.00112202	0.000866392	GDNF/HOXA11/IRX1/LHX1/NOG/SALL1/TMEM59L/WNT11	8
BP	GO:0006814	sodium ion transport	14/297	248/18870	4.11803e-05	0.00112538	0.000868986	GRP/HECW1/NKAIN2/NKAIN4/SCN4B/SCN5A/SCN9A/SERPINE2/SLC13A5/SLC5A12/SLC6A11/SLC6A15/SLC6A17/SLC6A2	14
BP	GO:0001667	ameboidal-type cell migration	21/297	497/18870	4.33175e-05	0.00117461	0.000906999	CCBE1/CDH13/CDH2/EFNB2/FAP/FGF19/FN1/FOXC2/GDNF/HAS1/HAS2/ITGA3/LOXL2/SCG2/SEMA3A/SEMA3C/SNAI2/THBS1/VEGFC/WNT11/WNT7A	21
BP	GO:0060070	canonical Wnt signaling pathway	16/297	316/18870	4.41003e-05	0.0011779	0.00090954	CAV1/CDH2/DACT1/DKK1/DKK3/EGFR/GLI1/HECW1/NKD1/NOG/SFRP5/SNAI2/SULF2/WNT11/WNT7A/YAP1	16
BP	GO:0050679	positive regulation of epithelial cell proliferation	13/297	218/18870	4.41123e-05	0.0011779	0.00090954	APLN/AREG/CDH13/EGFR/F3/HAS2/NOG/PTPRN/SCG2/SCN5A/VEGFC/WNT7A/YAP1	13
BP	GO:0009952	anterior/posterior pattern specification	13/297	219/18870	4.62456e-05	0.00122551	0.000946301	ALX4/BARX1/BASP1/DKK1/EN1/FOXA2/FOXC2/HOXA11/HOXB8/LHX1/NKD1/NOG/SEMA3C	13
BP	GO:0010810	regulation of cell-substrate adhesion	13/297	220/18870	4.84681e-05	0.00127475	0.000984323	AJAP1/CDH13/CORO2B/FN1/HAS2/ITGA3/ITGA5/ITGA6/PDPN/PLAU/SERPINE1/SPOCK1/THBS1	13
BP	GO:0042886	amide transport	17/297	354/18870	4.95724e-05	0.00129406	0.000999237	ANO1/AQP10/CHGA/FOLR3/FOXA2/GAL/GRP/IL6/KISS1/NKX6-1/NTSR1/PTPRN/SCT/SLC16A2/SLC7A11/SYT7/VGF	17
BP	GO:0015695	organic cation transport	7/297	62/18870	5.22758e-05	0.00135453	0.00104592	ADRA2C/PDZK1/SLC22A1/SLC22A3/SLC35F3/SLC6A2/SLC7A8	7
BP	GO:0072283	metanephric renal vesicle morphogenesis	4/297	14/18870	5.31526e-05	0.00135756	0.00104827	GDNF/LHX1/LIF/SALL1	4
BP	GO:0048592	eye morphogenesis	11/297	162/18870	5.31693e-05	0.00135756	0.00104827	BCAR3/DIO3/DSCAM/FBN2/FOXL2/LHX1/MFAP5/NKD1/SIX3/TENM3/TH	11
BP	GO:0007548	sex differentiation	15/297	288/18870	5.54415e-05	0.00140532	0.00108515	BASP1/FOXL2/FST/HOXA11/IL1A/INHBA/LHB/LHX1/NPR2/PTPRN/PTX3/SALL1/VGF/WNT7A/ZFP42	15
BP	GO:0060384	innervation	5/297	27/18870	5.67399e-05	0.00142789	0.00110257	NPR2/SEMA3A/SERPINE2/SLITRK6/SULF2	5
BP	GO:0007498	mesoderm development	10/297	136/18870	5.94775e-05	0.00148609	0.00114751	DKK1/FOXC2/HMGA2/HOXA11/INHBA/ITGA3/LHX1/NOG/WNT11/YAP1	10
BP	GO:2001233	regulation of apoptotic signaling pathway	18/297	398/18870	6.48589e-05	0.00160905	0.00124246	CAV1/COL2A1/CSF2/CTSV/GDNF/GSDME/IL1A/INHBA/ITGA6/NOG/SCG2/SERPINE1/SNAI2/SRPX/THBS1/TIMP3/TNFRSF12A/YAP1	18
BP	GO:0048638	regulation of developmental growth	16/297	328/18870	6.86072e-05	0.00169006	0.00130501	BASP1/DIO3/DSCAM/FN1/FOXC2/GLI1/L1CAM/NGF/NKD1/NKX6-1/NOG/SEMA3A/SEMA3C/STC2/TBX5/YAP1	16
BP	GO:0033627	cell adhesion mediated by integrin	8/297	88/18870	7.40339e-05	0.00181017	0.00139776	FOXC2/ITGA3/ITGA5/ITGA6/LIF/PLAU/SERPINE1/SNAI2	8
BP	GO:0015833	peptide transport	14/297	262/18870	7.45181e-05	0.00181017	0.00139776	ANO1/CHGA/FOXA2/GAL/GRP/IL6/KISS1/NKX6-1/PTPRN/SCT/SLC16A2/SLC7A11/SYT7/VGF	14
BP	GO:0048705	skeletal system morphogenesis	13/297	230/18870	7.63369e-05	0.00184156	0.001422	ALX4/COL2A1/FBN2/FOXC2/HAS2/HOXA11/HOXB8/LHX1/MMP13/MMP16/NOG/NPR2/WNT7A	13
BP	GO:0015844	monoamine transport	8/297	89/18870	8.02507e-05	0.0019017	0.00146843	ADRA2C/CHGA/GDNF/SLC22A1/SLC22A3/SLC6A2/SYT13/SYT7	8
BP	GO:0022037	metencephalon development	9/297	114/18870	8.029e-05	0.0019017	0.00146843	EN1/GLI1/GLI2/LHX1/LHX5/SCN5A/SERPINE2/WNT7A/ZNF365	9
BP	GO:0003007	heart morphogenesis	14/297	264/18870	8.08207e-05	0.0019017	0.00146843	ANKRD1/COL2A1/DKK1/FLRT2/FOXC2/HAS2/NOG/NRG1/SEMA3C/SNAI2/TBX5/TH/WNT11/YAP1	14
BP	GO:0003401	axis elongation	5/297	29/18870	8.13421e-05	0.0019017	0.00146843	AREG/NKD1/TNC/WNT11/YAP1	5
BP	GO:0007416	synapse assembly	12/297	200/18870	8.15479e-05	0.0019017	0.00146843	ADD2/AMIGO2/CDH2/DKK1/DNER/DSCAM/FLRT2/GAP43/SHANK2/SLITRK6/ST8SIA2/WNT7A	12
BP	GO:0038034	signal transduction in absence of ligand	7/297	67/18870	8.64497e-05	0.00195154	0.00150692	COL2A1/CSF2/GDNF/IL1A/INHBA/SNAI2/SRPX	7
BP	GO:0060675	ureteric bud morphogenesis	7/297	67/18870	8.64497e-05	0.00195154	0.00150692	GDNF/HOXA11/LHX1/NOG/SALL1/TMEM59L/WNT11	7
BP	GO:0097192	extrinsic apoptotic signaling pathway in absence of ligand	7/297	67/18870	8.64497e-05	0.00195154	0.00150692	COL2A1/CSF2/GDNF/IL1A/INHBA/SNAI2/SRPX	7
BP	GO:0007411	axon guidance	13/297	233/18870	8.70326e-05	0.00195154	0.00150692	DSCAM/EFNB2/FEZ1/FLRT2/GAP43/GDNF/GLI2/L1CAM/LHX1/NCAM1/NOG/SEMA3A/SEMA3C	13
BP	GO:0008406	gonad development	13/297	233/18870	8.70326e-05	0.00195154	0.00150692	BASP1/FOXL2/FST/HOXA11/IL1A/INHBA/LHB/NPR2/PTPRN/PTX3/SALL1/VGF/ZFP42	13
BP	GO:0097485	neuron projection guidance	13/297	233/18870	8.70326e-05	0.00195154	0.00150692	DSCAM/EFNB2/FEZ1/FLRT2/GAP43/GDNF/GLI2/L1CAM/LHX1/NCAM1/NOG/SEMA3A/SEMA3C	13
BP	GO:2000696	regulation of epithelial cell differentiation involved in kidney development	4/297	16/18870	9.42667e-05	0.00210029	0.00162178	GDNF/LHX1/LIF/YAP1	4
BP	GO:0072171	mesonephric tubule morphogenesis	7/297	68/18870	9.50883e-05	0.00210518	0.00162556	GDNF/HOXA11/LHX1/NOG/SALL1/TMEM59L/WNT11	7
BP	GO:0030195	negative regulation of blood coagulation	6/297	48/18870	0.000101744	0.00223836	0.0017284	FAP/PLAU/PROC/SERPINE1/SERPINE2/THBS1	6
BP	GO:0045137	development of primary sexual characteristics	13/297	238/18870	0.000107751	0.0023557	0.001819	BASP1/FOXL2/FST/HOXA11/IL1A/INHBA/LHB/NPR2/PTPRN/PTX3/SALL1/VGF/ZFP42	13
BP	GO:0001942	hair follicle development	8/297	93/18870	0.000109616	0.0023816	0.001839	ALX4/DKK1/EGFR/FOXI3/FST/GAL/GLI2/INHBA	8
BP	GO:0010975	regulation of neuron projection development	19/297	453/18870	0.000110412	0.00238408	0.00184092	CDH2/DKK1/DSCAM/EFNB2/FEZ1/FN1/HECW1/ITGA3/ITGA6/KIF1A/L1CAM/NEFL/NGF/SEMA3A/SEMA3C/SPOCK1/TENM3/WNT7A/ZNF365	19
BP	GO:0003338	metanephros morphogenesis	5/297	31/18870	0.000113424	0.00243408	0.00187953	BASP1/GDNF/LHX1/LIF/SALL1	5
BP	GO:1900047	negative regulation of hemostasis	6/297	49/18870	0.000114423	0.00244057	0.00188453	FAP/PLAU/PROC/SERPINE1/SERPINE2/THBS1	6
BP	GO:0015850	organic hydroxy compound transport	15/297	308/18870	0.000117479	0.00249056	0.00192314	ABCA4/ADRA2C/AQP10/CAV1/CHGA/FGF19/GAL/GDNF/SLC22A1/SLC22A3/SLC5A12/SLC6A2/SLCO1B3/SYT13/SYT7	15
BP	GO:0048704	embryonic skeletal system morphogenesis	8/297	94/18870	0.000118201	0.00249077	0.0019233	ALX4/COL2A1/FOXC2/HOXA11/HOXB8/LHX1/MMP16/NOG	8
BP	GO:0046660	female sex differentiation	9/297	120/18870	0.000119326	0.00249941	0.00192997	FOXL2/FST/INHBA/LHX1/NPR2/PTPRN/PTX3/VGF/ZFP42	9
BP	GO:0072077	renal vesicle morphogenesis	4/297	17/18870	0.000121749	0.00251288	0.00194037	GDNF/LHX1/LIF/SALL1	4
BP	GO:0090494	dopamine uptake	4/297	17/18870	0.000121749	0.00251288	0.00194037	GDNF/SLC22A1/SLC22A3/SLC6A2	4
BP	GO:0030072	peptide hormone secretion	13/297	241/18870	0.000122124	0.00251288	0.00194037	ANO1/CHGA/FOXA2/GAL/GRP/IL6/KISS1/NKX6-1/PTPRN/SCT/SLC16A2/SYT7/VGF	13
BP	GO:0001837	epithelial to mesenchymal transition	11/297	178/18870	0.000123943	0.0025354	0.00195776	FOXA2/HAS2/HMGA2/IL6/LOXL2/NCAM1/NOG/PDPN/SNAI2/TBX5/WNT11	11
BP	GO:0007044	cell-substrate junction assembly	8/297	95/18870	0.000127334	0.00258203	0.00199377	ACTN1/COL17A1/CORO2B/FN1/ITGA5/ITGA6/LAMA3/THBS1	8
BP	GO:0016049	cell growth	20/297	497/18870	0.000127699	0.00258203	0.00199377	DCBLD2/DCUN1D5/DSCAM/EGFR/FN1/FOXL2/INHBA/L1CAM/NGF/NKX6-1/NPR2/ROS1/SEMA3A/SEMA3C/SERPINE2/SPOCK1/ST8SIA2/TNC/WNT11/YAP1	20
BP	GO:0007612	learning	10/297	150/18870	0.000134958	0.00269311	0.00207954	BCHE/DKK1/EN1/JPH3/LRRN4/NOG/NTSR1/SHANK2/SLC7A11/TH	10
BP	GO:0045667	regulation of osteoblast differentiation	10/297	150/18870	0.000134958	0.00269311	0.00207954	AREG/FBN2/GDPD2/GLI1/IL6/NOG/SMOC1/SNAI2/VEGFC/YAP1	10
BP	GO:0061035	regulation of cartilage development	7/297	72/18870	0.000136959	0.00269311	0.00207954	GDF6/HOXA11/LOXL2/NOG/PTHLH/SNAI2/WNT11	7
BP	GO:0022404	molting cycle process	8/297	96/18870	0.000137042	0.00269311	0.00207954	ALX4/DKK1/EGFR/FOXI3/FST/GAL/GLI2/INHBA	8
BP	GO:0022405	hair cycle process	8/297	96/18870	0.000137042	0.00269311	0.00207954	ALX4/DKK1/EGFR/FOXI3/FST/GAL/GLI2/INHBA	8
BP	GO:0002065	columnar/cuboidal epithelial cell differentiation	9/297	123/18870	0.000144139	0.00281348	0.00217249	CAV1/CDH2/FST/IL31RA/NKX6-1/ROS1/SERPINE1/WNT11/YAP1	9
BP	GO:0098742	cell-cell adhesion via plasma-membrane adhesion molecules	14/297	279/18870	0.000144776	0.00281348	0.00217249	AMIGO2/CDH13/CDH2/CLDN6/DSCAM/ITGA3/ITGA5/L1CAM/PCDHGB1/PCDHGB6/PSG5/SCARF2/TENM2/TENM3	14
BP	GO:0002790	peptide secretion	13/297	246/18870	0.000149765	0.00287659	0.00222122	ANO1/CHGA/FOXA2/GAL/GRP/IL6/KISS1/NKX6-1/PTPRN/SCT/SLC16A2/SYT7/VGF	13
BP	GO:0046942	carboxylic acid transport	16/297	351/18870	0.000150539	0.00287659	0.00222122	FGF19/FOLR3/IL1A/NTSR1/SLC13A5/SLC16A2/SLC22A1/SLC22A3/SLC5A12/SLC6A11/SLC6A15/SLC6A17/SLC7A11/SLC7A8/SLCO1B3/THBS1	16
BP	GO:0035115	embryonic forelimb morphogenesis	5/297	33/18870	0.000154409	0.00287659	0.00222122	ALX4/EN1/HOXA11/TBX5/WNT7A	5
BP	GO:0001946	lymphangiogenesis	4/297	18/18870	0.000154602	0.00287659	0.00222122	CCBE1/FOXC2/PDPN/VEGFC	4
BP	GO:0010755	regulation of plasminogen activation	4/297	18/18870	0.000154602	0.00287659	0.00222122	PLAU/SERPINE1/SERPINE2/THBS1	4
BP	GO:0051917	regulation of fibrinolysis	4/297	18/18870	0.000154602	0.00287659	0.00222122	FAP/PLAU/SERPINE1/THBS1	4
BP	GO:0072087	renal vesicle development	4/297	18/18870	0.000154602	0.00287659	0.00222122	GDNF/LHX1/LIF/SALL1	4
BP	GO:0090493	catecholamine uptake	4/297	18/18870	0.000154602	0.00287659	0.00222122	GDNF/SLC22A1/SLC22A3/SLC6A2	4
BP	GO:0015849	organic acid transport	16/297	352/18870	0.000155507	0.00287811	0.0022224	FGF19/FOLR3/IL1A/NTSR1/SLC13A5/SLC16A2/SLC22A1/SLC22A3/SLC5A12/SLC6A11/SLC6A15/SLC6A17/SLC7A11/SLC7A8/SLCO1B3/THBS1	16
BP	GO:0050819	negative regulation of coagulation	6/297	52/18870	0.000160135	0.00294816	0.00227648	FAP/PLAU/PROC/SERPINE1/SERPINE2/THBS1	6
BP	GO:0050890	cognition	15/297	317/18870	0.000161109	0.00295057	0.00227834	BCHE/CAMK2N1/DKK1/EGFR/EN1/ITGA3/ITGA5/JPH3/LRRN4/NGF/NOG/NTSR1/SHANK2/SLC7A11/TH	15
BP	GO:0007517	muscle organ development	16/297	354/18870	0.000165874	0.00302202	0.00233352	ALX4/ANKRD1/BASP1/CAV1/DNER/FOXC2/FOXL2/LIF/MSC/MYH3/MYMK/MYOG/NOG/NRG1/POPDC3/SGCE	16
BP	GO:0061045	negative regulation of wound healing	7/297	75/18870	0.000177277	0.00320593	0.00247552	AJAP1/FAP/PLAU/PROC/SERPINE1/SERPINE2/THBS1	7
BP	GO:2001238	positive regulation of extrinsic apoptotic signaling pathway	6/297	53/18870	0.000178217	0.00320593	0.00247552	CAV1/INHBA/SRPX/THBS1/TIMP3/TNFRSF12A	6
BP	GO:0031128	developmental induction	5/297	34/18870	0.000178718	0.00320593	0.00247552	DKK1/GDNF/HOXA11/SALL1/WNT11	5
BP	GO:0090287	regulation of cellular response to growth factor stimulus	16/297	357/18870	0.000182554	0.00325803	0.00251576	APLN/CCBE1/DKK1/DKK3/FBN2/FST/FSTL3/ITGA3/ITGA5/NOG/PEG10/PMEPA1/SULF2/THBS1/VEGFC/VEPH1	16
BP	GO:0060537	muscle tissue development	18/297	433/18870	0.000186417	0.00331008	0.00255595	ANKRD1/CAV1/DKK1/DNER/EFNB2/FOXC2/FOXL2/GLI1/MSC/MYOG/NOG/NPR2/NRG1/POPDC3/SCN5A/SEMA3C/TBX5/YAP1	18
BP	GO:0060231	mesenchymal to epithelial transition	4/297	19/18870	0.000193413	0.00339628	0.00262251	BASP1/GDNF/LIF/SALL1	4
BP	GO:0010721	negative regulation of cell development	14/297	287/18870	0.000194123	0.00339628	0.00262251	FSTL3/IL1A/IL6/INHBA/LRRC17/NKX6-1/NOG/NPR2/PAEP/PTHLH/SEMA3A/SEMA3C/SNAI2/WNT7A	14
BP	GO:0010951	negative regulation of endopeptidase activity	9/297	128/18870	0.000195019	0.00339628	0.00262251	CST4/SERPINA5/SERPINE1/SERPINE2/SPOCK1/SPOCK3/THBS1/TIMP3/TIMP4	9
BP	GO:0008585	female gonad development	8/297	101/18870	0.000195199	0.00339628	0.00262251	FOXL2/FST/INHBA/NPR2/PTPRN/PTX3/VGF/ZFP42	8
BP	GO:0030902	hindbrain development	10/297	157/18870	0.000196126	0.00339628	0.00262251	EN1/GLI1/GLI2/LHX1/LHX5/NOG/SCN5A/SERPINE2/WNT7A/ZNF365	10
BP	GO:1903532	positive regulation of secretion by cell	14/297	288/18870	0.000201209	0.00346714	0.00267723	ANKRD1/ANO1/FOXL2/GAL/GDNF/GRP/IL1A/INHBA/KISS1/NKX6-1/NTSR1/SCT/SYT7/VEGFC	14
BP	GO:0048048	embryonic eye morphogenesis	5/297	35/18870	0.000205842	0.00347843	0.00268594	FBN2/FOXL2/MFAP5/SIX3/TH	5
BP	GO:0098810	neurotransmitter reuptake	5/297	35/18870	0.000205842	0.00347843	0.00268594	GDNF/SLC22A1/SLC22A3/SLC6A11/SLC6A2	5
BP	GO:1901099	negative regulation of signal transduction in absence of ligand	5/297	35/18870	0.000205842	0.00347843	0.00268594	COL2A1/CSF2/GDNF/IL1A/SNAI2	5
BP	GO:2001240	negative regulation of extrinsic apoptotic signaling pathway in absence of ligand	5/297	35/18870	0.000205842	0.00347843	0.00268594	COL2A1/CSF2/GDNF/IL1A/SNAI2	5
BP	GO:0021510	spinal cord development	8/297	102/18870	0.000208966	0.00349743	0.00270061	GDNF/GLI2/HOXB8/LHX1/LHX5/NEFL/NOG/RFX8	8
BP	GO:0150115	cell-substrate junction organization	8/297	102/18870	0.000208966	0.00349743	0.00270061	ACTN1/COL17A1/CORO2B/FN1/ITGA5/ITGA6/LAMA3/THBS1	8
BP	GO:0015872	dopamine transport	6/297	55/18870	0.000219203	0.00365129	0.00281942	GDNF/SLC22A1/SLC22A3/SLC6A2/SYT13/SYT7	6
BP	GO:0021516	dorsal spinal cord development	4/297	20/18870	0.000238785	0.00394176	0.00304371	GDNF/HOXB8/LHX1/LHX5	4
BP	GO:0033138	positive regulation of peptidyl-serine phosphorylation	8/297	104/18870	0.000238895	0.00394176	0.00304371	BCAR3/CAV1/EGFR/IFNK/IL11/IL6/LIF/NGF	8
BP	GO:0046545	development of primary female sexual characteristics	8/297	105/18870	0.000255125	0.0041898	0.00323524	FOXL2/FST/INHBA/NPR2/PTPRN/PTX3/VGF/ZFP42	8
BP	GO:0042733	embryonic digit morphogenesis	6/297	57/18870	0.000267271	0.00436876	0.00337343	ALX4/FREM2/HOXA11/NOG/SALL1/WNT7A	6
BP	GO:0032963	collagen metabolic process	8/297	106/18870	0.000272247	0.00442939	0.00342024	FAP/IL6/INHBA/MMP1/MMP10/MMP13/MMP16/P3H2	8
BP	GO:0008344	adult locomotory behavior	7/297	81/18870	0.000286646	0.00462925	0.00357457	EN1/FOXA2/GDNF/HOXB8/NTSR1/SHANK2/SLITRK6	7
BP	GO:0099173	postsynapse organization	11/297	196/18870	0.000287178	0.00462925	0.00357457	ACTN1/CDH2/GAP43/GDNF/ITGA3/KIF1A/NEFL/SHANK2/SLC7A11/WNT7A/ZNF365	11
BP	GO:0050730	regulation of peptidyl-tyrosine phosphorylation	12/297	231/18870	0.00031284	0.00501979	0.00387613	AREG/CAV1/CSF2/CSPG4/EGFR/IL11/IL24/IL31RA/IL6/ITGA5/LIF/PDGFC	12
BP	GO:0042063	gliogenesis	15/297	338/18870	0.000320919	0.00512591	0.00395807	ANO1/AREG/CDH2/CSPG4/DNER/FGF5/GAP43/IL6/LIF/NKX6-1/NOG/SERPINE2/TSPAN2/VEGFC/ZNF365	15
BP	GO:0010466	negative regulation of peptidase activity	9/297	137/18870	0.000324143	0.00515387	0.00397967	CST4/SERPINA5/SERPINE1/SERPINE2/SPOCK1/SPOCK3/THBS1/TIMP3/TIMP4	9
BP	GO:0033135	regulation of peptidyl-serine phosphorylation	9/297	138/18870	0.000342063	0.00541419	0.00418068	BCAR3/CAV1/DKK1/EGFR/IFNK/IL11/IL6/LIF/NGF	9
BP	GO:0001558	regulation of cell growth	17/297	417/18870	0.000351072	0.0055166	0.00425975	DCBLD2/DCUN1D5/DSCAM/EGFR/FN1/INHBA/L1CAM/NGF/NKX6-1/ROS1/SEMA3A/SEMA3C/SERPINE2/SPOCK1/TNC/WNT11/YAP1	17
BP	GO:0015874	norepinephrine transport	4/297	22/18870	0.000351687	0.0055166	0.00425975	ADRA2C/SLC22A1/SLC22A3/SLC6A2	4
BP	GO:0001658	branching involved in ureteric bud morphogenesis	6/297	60/18870	0.000354485	0.00553566	0.00427448	GDNF/HOXA11/LHX1/NOG/SALL1/TMEM59L	6
BP	GO:0002028	regulation of sodium ion transport	7/297	85/18870	0.000385736	0.00595317	0.00459686	GRP/HECW1/NKAIN2/NKAIN4/SCN4B/SCN5A/SERPINE2	7
BP	GO:0061053	somite development	7/297	85/18870	0.000385736	0.00595317	0.00459686	DKK1/FOXC2/LHX1/NKD1/NOG/SEMA3C/WNT11	7
BP	GO:0043010	camera-type eye development	15/297	344/18870	0.000386326	0.00595317	0.00459686	BCAR3/DIO3/DSCAM/EGFR/FBN2/FOXC2/FOXL2/INHBA/LHX1/SIX3/SLC7A11/SLITRK6/TENM3/TH/WNT7A	15
BP	GO:0090497	mesenchymal cell migration	6/297	61/18870	0.000388029	0.00595318	0.00459687	CDH2/FGF19/FN1/GDNF/SEMA3A/SEMA3C	6
BP	GO:0008543	fibroblast growth factor receptor signaling pathway	7/297	86/18870	0.000414352	0.00627177	0.00484287	APLN/FGF19/FGF5/FLRT2/NOG/SULF2/THBS1	7
BP	GO:0001759	organ induction	4/297	23/18870	0.000420484	0.00627177	0.00484287	DKK1/GDNF/HOXA11/WNT11	4
BP	GO:0021533	cell differentiation in hindbrain	4/297	23/18870	0.000420484	0.00627177	0.00484287	LHX1/LHX5/NOG/WNT7A	4
BP	GO:0036303	lymph vessel morphogenesis	4/297	23/18870	0.000420484	0.00627177	0.00484287	CCBE1/FOXC2/PDPN/VEGFC	4
BP	GO:0060065	uterus development	4/297	23/18870	0.000420484	0.00627177	0.00484287	FOXL2/HOXA11/LHX1/WNT7A	4
BP	GO:0072202	cell differentiation involved in metanephros development	4/297	23/18870	0.000420484	0.00627177	0.00484287	GDNF/LIF/SALL1/YAP1	4
BP	GO:0051047	positive regulation of secretion	14/297	310/18870	0.000424396	0.00627177	0.00484287	ANKRD1/ANO1/FOXL2/GAL/GDNF/GRP/IL1A/INHBA/KISS1/NKX6-1/NTSR1/SCT/SYT7/VEGFC	14
BP	GO:0015820	leucine transport	3/297	10/18870	0.000426724	0.00627177	0.00484287	SLC6A15/SLC6A17/SLC7A8	3
BP	GO:0060245	detection of cell density	3/297	10/18870	0.000426724	0.00627177	0.00484287	FAP/SRPX/YAP1	3
BP	GO:0140059	dendrite arborization	3/297	10/18870	0.000426724	0.00627177	0.00484287	IGF2BP1/SEMA3A/ZNF365	3
BP	GO:0035136	forelimb morphogenesis	5/297	41/18870	0.000439954	0.00641233	0.00495141	ALX4/EN1/HOXA11/TBX5/WNT7A	5
BP	GO:0072210	metanephric nephron development	5/297	41/18870	0.000439954	0.00641233	0.00495141	GDNF/IRX1/LHX1/LIF/SALL1	5
BP	GO:0052547	regulation of peptidase activity	14/297	312/18870	0.000452468	0.00656735	0.00507112	BIRC2/CAV1/CST4/CTSV/F3/FOXL2/SERPINA5/SERPINE1/SERPINE2/SPOCK1/SPOCK3/THBS1/TIMP3/TIMP4	14
BP	GO:0044344	cellular response to fibroblast growth factor stimulus	8/297	115/18870	0.000472848	0.0068348	0.00527763	APLN/FGF19/FGF5/FLRT2/LHX1/NOG/SULF2/THBS1	8
BP	GO:0050767	regulation of neurogenesis	16/297	390/18870	0.000486715	0.00700629	0.00541005	DSCAM/FN1/IL6/L1CAM/LIF/NEFL/NGF/NKX6-1/NOG/SEMA3A/SEMA3C/SERPINE2/VEGFC/WNT7A/YAP1/ZNF365	16
BP	GO:0021983	pituitary gland development	5/297	42/18870	0.000493046	0.00706834	0.00545797	GLI1/GLI2/NOG/SALL1/SIX3	5
BP	GO:0072273	metanephric nephron morphogenesis	4/297	24/18870	0.00049837	0.00711551	0.00549439	GDNF/LHX1/LIF/SALL1	4
BP	GO:0030177	positive regulation of Wnt signaling pathway	9/297	146/18870	0.000517019	0.00735176	0.00567681	CAV1/DACT1/DKK1/EGFR/NKD1/RSPO4/SALL1/SULF2/YAP1	9
BP	GO:0043588	skin development	14/297	317/18870	0.000529664	0.00745448	0.00575613	ALX4/COL5A3/DKK1/EGFR/FOXI3/FST/GAL/GLI2/IL1A/INHBA/ITGA3/ITGA6/YAP1/ZBED2	14
BP	GO:0042303	molting cycle	8/297	117/18870	0.000530636	0.00745448	0.00575613	ALX4/DKK1/EGFR/FOXI3/FST/GAL/GLI2/INHBA	8
BP	GO:0042633	hair cycle	8/297	117/18870	0.000530636	0.00745448	0.00575613	ALX4/DKK1/EGFR/FOXI3/FST/GAL/GLI2/INHBA	8
BP	GO:0030199	collagen fibril organization	6/297	65/18870	0.00054772	0.00763317	0.00589411	COL28A1/COL2A1/COL5A3/FOXC2/LOXL2/TLL1	6
BP	GO:1905330	regulation of morphogenesis of an epithelium	6/297	65/18870	0.00054772	0.00763317	0.00589411	GDNF/LHX1/LIF/NKD1/NOG/SNAI2	6
BP	GO:0015718	monocarboxylic acid transport	10/297	179/18870	0.00055821	0.00774849	0.00598316	FGF19/IL1A/NTSR1/SLC16A2/SLC22A1/SLC22A3/SLC5A12/SLC6A11/SLCO1B3/THBS1	10
BP	GO:0003337	mesenchymal to epithelial transition involved in metanephros morphogenesis	3/297	11/18870	0.000579924	0.00785374	0.00606443	GDNF/LIF/SALL1	3
BP	GO:0021936	regulation of cerebellar granule cell precursor proliferation	3/297	11/18870	0.000579924	0.00785374	0.00606443	GLI1/LHX1/LHX5	3
BP	GO:0032276	regulation of gonadotropin secretion	3/297	11/18870	0.000579924	0.00785374	0.00606443	FOXL2/INHBA/KISS1	3
BP	GO:0048241	epinephrine transport	3/297	11/18870	0.000579924	0.00785374	0.00606443	ADRA2C/SLC22A1/SLC22A3	3
BP	GO:0060272	embryonic skeletal joint morphogenesis	3/297	11/18870	0.000579924	0.00785374	0.00606443	COL2A1/HOXA11/NOG	3
BP	GO:1901998	toxin transport	3/297	11/18870	0.000579924	0.00785374	0.00606443	SLC22A1/SLC22A3/SLC7A8	3
BP	GO:0035725	sodium ion transmembrane transport	10/297	180/18870	0.000582998	0.00785374	0.00606443	GRP/HECW1/SCN4B/SCN5A/SCN9A/SLC13A5/SLC6A11/SLC6A15/SLC6A17/SLC6A2	10
BP	GO:0060021	roof of mouth development	7/297	91/18870	0.000583919	0.00785374	0.00606443	ALX4/COL2A1/INHBA/MSC/SNAI2/WNT11/WNT7A	7
BP	GO:0050927	positive regulation of positive chemotaxis	4/297	25/18870	0.000586	0.00785374	0.00606443	CDH13/F3/SCG2/VEGFC	4
BP	GO:0001738	morphogenesis of a polarized epithelium	7/297	92/18870	0.000623643	0.00832635	0.00642936	AJAP1/DACT1/DKK1/NKD1/WNT11/WNT7A/YAP1	7
BP	GO:0045165	cell fate commitment	13/297	286/18870	0.000636776	0.00846936	0.00653979	DKK1/FOXA2/FOXC2/FOXI3/GAP43/GLI2/HOXA11/IL6/MYOG/PDPN/TBX5/WNT11/WNT7A	13
BP	GO:0001655	urogenital system development	6/297	67/18870	0.000644633	0.00850915	0.00657052	GLI1/HOXA11/LHX1/NOG/TNC/WNT11	6
BP	GO:0048645	animal organ formation	6/297	67/18870	0.000644633	0.00850915	0.00657052	DKK1/GDNF/HOXA11/NOG/TBX5/WNT11	6
BP	GO:0045785	positive regulation of cell adhesion	18/297	482/18870	0.000668261	0.00878789	0.00678575	CAV1/CDH13/EFNB2/FN1/FOXA2/FOXC2/FRMD5/FSTL3/GLI2/HAS2/IBSP/IL1A/IL6/ITGA3/ITGA5/ITGA6/LIF/PDPN	18
BP	GO:0010001	glial cell differentiation	12/297	252/18870	0.000680839	0.00882929	0.00681772	ANO1/CDH2/DNER/FGF5/GAP43/IL6/LIF/NKX6-1/NOG/SERPINE2/TSPAN2/ZNF365	12
BP	GO:0001504	neurotransmitter uptake	5/297	45/18870	0.000681433	0.00882929	0.00681772	GDNF/SLC22A1/SLC22A3/SLC6A11/SLC6A2	5
BP	GO:0030574	collagen catabolic process	5/297	45/18870	0.000681433	0.00882929	0.00681772	FAP/MMP1/MMP10/MMP13/MMP16	5
BP	GO:0006929	substrate-dependent cell migration	4/297	26/18870	0.00068403	0.00882929	0.00681772	CSPG4/FN1/SNAI2/VEGFC	4
BP	GO:0050926	regulation of positive chemotaxis	4/297	26/18870	0.00068403	0.00882929	0.00681772	CDH13/F3/SCG2/VEGFC	4
BP	GO:0035567	non-canonical Wnt signaling pathway	6/297	68/18870	0.000697814	0.0089741	0.00692954	DACT1/DKK1/NKD1/SFRP5/WNT11/WNT7A	6
BP	GO:0051346	negative regulation of hydrolase activity	11/297	218/18870	0.000703489	0.00901393	0.00696029	CST4/PPP4R4/PTX3/SERPINA5/SERPINE1/SERPINE2/SPOCK1/SPOCK3/THBS1/TIMP3/TIMP4	11
BP	GO:0072182	regulation of nephron tubule epithelial cell differentiation	3/297	12/18870	0.00076425	0.00975674	0.00753387	LHX1/LIF/YAP1	3
BP	GO:0021846	cell proliferation in forebrain	4/297	27/18870	0.000793124	0.0100157	0.00773383	IGF2BP1/LHX5/SIX3/WNT7A	4
BP	GO:0031639	plasminogen activation	4/297	27/18870	0.000793124	0.0100157	0.00773383	PLAU/SERPINE1/SERPINE2/THBS1	4
BP	GO:0042730	fibrinolysis	4/297	27/18870	0.000793124	0.0100157	0.00773383	FAP/PLAU/SERPINE1/THBS1	4
BP	GO:1905039	carboxylic acid transmembrane transport	9/297	156/18870	0.000832725	0.0104555	0.00807345	NTSR1/SLC13A5/SLC16A2/SLC5A12/SLC6A11/SLC6A15/SLC7A11/SLC7A8/THBS1	9
BP	GO:0010837	regulation of keratinocyte proliferation	5/297	47/18870	0.000833931	0.0104555	0.00807345	AREG/EFNB2/HAS2/SNAI2/YAP1	5
BP	GO:1903035	negative regulation of response to wounding	7/297	97/18870	0.000855606	0.010689	0.00825371	AJAP1/FAP/PLAU/PROC/SERPINE1/SERPINE2/THBS1	7
BP	GO:0050770	regulation of axonogenesis	9/297	157/18870	0.000871437	0.0108095	0.0083468	CDH2/DSCAM/FN1/L1CAM/NEFL/NGF/SEMA3A/SEMA3C/WNT7A	9
BP	GO:1903825	organic acid transmembrane transport	9/297	157/18870	0.000871437	0.0108095	0.0083468	NTSR1/SLC13A5/SLC16A2/SLC5A12/SLC6A11/SLC6A15/SLC7A11/SLC7A8/THBS1	9
BP	GO:0042698	ovulation cycle	6/297	71/18870	0.000877915	0.0108514	0.00837914	HAS2/INHBA/KISS1/NPR2/PTPRN/PTX3	6
BP	GO:0060562	epithelial tube morphogenesis	14/297	334/18870	0.000881391	0.010856	0.00838269	AREG/EFNB2/FOXC2/GDNF/GLI2/HOXA11/IRX1/LHX1/NOG/SALL1/TMEM59L/TNC/WNT11/YAP1	14
BP	GO:0090092	regulation of transmembrane receptor protein serine/threonine kinase signaling pathway	13/297	297/18870	0.000901939	0.0110622	0.00854193	DKK1/DKK3/FBN2/FST/FSTL3/GDF6/INHBA/ITGA3/NOG/PEG10/PMEPA1/THBS1/VEPH1	13
BP	GO:0003231	cardiac ventricle development	8/297	127/18870	0.000911483	0.0110622	0.00854193	FOXC2/NOG/NRG1/SALL1/SCN5A/SEMA3C/TBX5/WNT11	8
BP	GO:0003156	regulation of animal organ formation	4/297	28/18870	0.000913946	0.0110622	0.00854193	DKK1/GDNF/HOXA11/WNT11	4
BP	GO:0030194	positive regulation of blood coagulation	4/297	28/18870	0.000913946	0.0110622	0.00854193	F3/PLAU/SERPINE1/THBS1	4
BP	GO:1900048	positive regulation of hemostasis	4/297	28/18870	0.000913946	0.0110622	0.00854193	F3/PLAU/SERPINE1/THBS1	4
BP	GO:0014015	positive regulation of gliogenesis	6/297	72/18870	0.000945275	0.0113628	0.00877401	IL6/LIF/NKX6-1/SERPINE2/VEGFC/ZNF365	6
BP	GO:0030858	positive regulation of epithelial cell differentiation	6/297	72/18870	0.000945275	0.0113628	0.00877401	GDNF/LHX1/LIF/NKX6-1/SERPINE1/ZBED2	6
BP	GO:0098773	skin epidermis development	8/297	128/18870	0.000959247	0.0114913	0.00887321	ALX4/DKK1/EGFR/FOXI3/FST/GAL/GLI2/INHBA	8
BP	GO:0051918	negative regulation of fibrinolysis	3/297	13/18870	0.000981992	0.0117236	0.0090526	PLAU/SERPINE1/THBS1	3
BP	GO:0033628	regulation of cell adhesion mediated by integrin	5/297	49/18870	0.00101051	0.0119822	0.00925231	FOXC2/LIF/PLAU/SERPINE1/SNAI2	5
BP	GO:0060071	Wnt signaling pathway, planar cell polarity pathway	5/297	49/18870	0.00101051	0.0119822	0.00925231	DACT1/DKK1/NKD1/WNT11/WNT7A	5
BP	GO:0014706	striated muscle tissue development	12/297	264/18870	0.00102019	0.0120561	0.00930938	ANKRD1/DKK1/EFNB2/FOXC2/GLI1/MSC/NOG/NRG1/SCN5A/SEMA3C/TBX5/YAP1	12
BP	GO:2000177	regulation of neural precursor cell proliferation	7/297	100/18870	0.00102446	0.0120659	0.0093169	CDH2/GLI1/LHX1/LHX5/SIX3/SLC16A2/VEGFC	7
BP	GO:0022602	ovulation cycle process	5/297	50/18870	0.00110853	0.0130122	0.0100476	INHBA/KISS1/NPR2/PTPRN/PTX3	5
BP	GO:0050920	regulation of chemotaxis	11/297	232/18870	0.00116868	0.0136724	0.0105574	CDH13/DSCAM/EFNB2/F3/IL6/SCG2/SEMA3A/SEMA3C/SERPINE1/THBS1/VEGFC	11
BP	GO:0010575	positive regulation of vascular endothelial growth factor production	4/297	30/18870	0.00119344	0.0137777	0.0106388	CCBE1/IL1A/IL6/SULF2	4
BP	GO:0010955	negative regulation of protein processing	4/297	30/18870	0.00119344	0.0137777	0.0106388	PLAU/SERPINE1/SERPINE2/THBS1	4
BP	GO:0050820	positive regulation of coagulation	4/297	30/18870	0.00119344	0.0137777	0.0106388	F3/PLAU/SERPINE1/THBS1	4
BP	GO:1903318	negative regulation of protein maturation	4/297	30/18870	0.00119344	0.0137777	0.0106388	PLAU/SERPINE1/SERPINE2/THBS1	4
BP	GO:0035282	segmentation	7/297	103/18870	0.00121847	0.0140204	0.0108262	BASP1/DKK1/FOXC2/IRX1/LHX1/NKD1/SEMA3C	7
BP	GO:0015803	branched-chain amino acid transport	3/297	14/18870	0.00123531	0.0141213	0.0109041	SLC6A15/SLC6A17/SLC7A8	3
BP	GO:0072160	nephron tubule epithelial cell differentiation	3/297	14/18870	0.00123531	0.0141213	0.0109041	LHX1/LIF/YAP1	3
BP	GO:0006935	chemotaxis	17/297	468/18870	0.00126478	0.014411	0.0111278	CDH13/CHGA/DSCAM/EFNB2/F3/FLRT2/GDNF/IL6/L1CAM/NRG1/PLAU/SCG2/SEMA3A/SEMA3C/SERPINE1/THBS1/VEGFC	17
BP	GO:0061351	neural precursor cell proliferation	9/297	166/18870	0.00129008	0.0146517	0.0113136	CDH2/GLI1/IGF2BP1/LHX1/LHX5/SIX3/SLC16A2/VEGFC/WNT7A	9
BP	GO:0042330	taxis	17/297	470/18870	0.00132392	0.0149873	0.0115728	CDH13/CHGA/DSCAM/EFNB2/F3/FLRT2/GDNF/IL6/L1CAM/NRG1/PLAU/SCG2/SEMA3A/SEMA3C/SERPINE1/THBS1/VEGFC	17
BP	GO:0048639	positive regulation of developmental growth	9/297	167/18870	0.00134519	0.0151789	0.0117207	BASP1/DIO3/DSCAM/FN1/GLI1/L1CAM/NGF/TBX5/YAP1	9
BP	GO:0003205	cardiac chamber development	9/297	168/18870	0.00140217	0.0157205	0.0121389	ADAMTS6/FOXC2/NOG/NRG1/SALL1/SCN5A/SEMA3C/TBX5/WNT11	9
BP	GO:0050731	positive regulation of peptidyl-tyrosine phosphorylation	9/297	168/18870	0.00140217	0.0157205	0.0121389	AREG/CSF2/CSPG4/IL11/IL24/IL31RA/IL6/ITGA5/LIF	9
BP	GO:0042509	regulation of tyrosine phosphorylation of STAT protein	6/297	78/18870	0.00143677	0.0159953	0.0123511	CAV1/CSF2/IL24/IL31RA/IL6/LIF	6
BP	GO:1901890	positive regulation of cell junction assembly	7/297	106/18870	0.00144015	0.0159953	0.0123511	AMIGO2/CAV1/FLRT2/SLITRK6/ST8SIA2/TBX5/WNT7A	7
BP	GO:0032330	regulation of chondrocyte differentiation	5/297	53/18870	0.00144497	0.0159953	0.0123511	GDF6/HOXA11/LOXL2/PTHLH/SNAI2	5
BP	GO:0090175	regulation of establishment of planar polarity	5/297	53/18870	0.00144497	0.0159953	0.0123511	DACT1/DKK1/NKD1/WNT11/WNT7A	5
BP	GO:0018108	peptidyl-tyrosine phosphorylation	12/297	276/18870	0.00148986	0.0164402	0.0126946	AREG/CAV1/CSF2/CSPG4/EGFR/IL11/IL24/IL31RA/IL6/ITGA5/LIF/PDGFC	12
BP	GO:0072176	nephric duct development	3/297	15/18870	0.00152624	0.016546	0.0127763	EFNB2/LHX1/WNT11	3
BP	GO:0072498	embryonic skeletal joint development	3/297	15/18870	0.00152624	0.016546	0.0127763	COL2A1/HOXA11/NOG	3
BP	GO:0001958	endochondral ossification	4/297	32/18870	0.00152783	0.016546	0.0127763	COL2A1/MMP13/MMP16/NPR2	4
BP	GO:0036075	replacement ossification	4/297	32/18870	0.00152783	0.016546	0.0127763	COL2A1/MMP13/MMP16/NPR2	4
BP	GO:0048710	regulation of astrocyte differentiation	4/297	32/18870	0.00152783	0.016546	0.0127763	IL6/LIF/NOG/SERPINE2	4
BP	GO:0061037	negative regulation of cartilage development	4/297	32/18870	0.00152783	0.016546	0.0127763	NOG/PTHLH/SNAI2/WNT11	4
BP	GO:0045685	regulation of glial cell differentiation	6/297	79/18870	0.00153469	0.016569	0.0127941	IL6/LIF/NKX6-1/NOG/SERPINE2/ZNF365	6
BP	GO:0009581	detection of external stimulus	8/297	138/18870	0.00155608	0.0167482	0.0129325	ABCA4/ANO1/CDH2/CHRNA9/CNGB1/NTSR1/SCN9A/SERPINE2	8
BP	GO:0018212	peptidyl-tyrosine modification	12/297	278/18870	0.00158323	0.0169881	0.0131177	AREG/CAV1/CSF2/CSPG4/EGFR/IL11/IL24/IL31RA/IL6/ITGA5/LIF/PDGFC	12
BP	GO:0015837	amine transport	7/297	108/18870	0.00160459	0.0171647	0.0132541	ADRA2C/CHGA/GDNF/NTSR1/SYT13/SYT7/TH	7
BP	GO:0050769	positive regulation of neurogenesis	11/297	242/18870	0.00163664	0.0174541	0.0134776	DSCAM/FN1/IL6/L1CAM/LIF/NEFL/NGF/NKX6-1/SERPINE2/VEGFC/ZNF365	11
BP	GO:0006836	neurotransmitter transport	10/297	207/18870	0.00168584	0.0178283	0.0137665	GDNF/SLC22A1/SLC22A3/SLC6A11/SLC6A15/SLC6A17/SLC6A2/SYT7/TH/WNT7A	10
BP	GO:0010959	regulation of metal ion transport	15/297	398/18870	0.00168825	0.0178283	0.0137665	CAV1/GAL/GRP/HECW1/JPH3/LRRC38/NKAIN2/NKAIN4/NTSR1/PLPP4/SCN4B/SCN5A/SERPINE2/STC2/TRPC1	15
BP	GO:2001234	negative regulation of apoptotic signaling pathway	11/297	243/18870	0.00169083	0.0178283	0.0137665	COL2A1/CSF2/GDNF/IL1A/ITGA6/NOG/SCG2/SERPINE1/SNAI2/THBS1/YAP1	11
BP	GO:0061387	regulation of extent of cell growth	7/297	109/18870	0.00169211	0.0178283	0.0137665	DSCAM/FN1/L1CAM/NGF/NKX6-1/SEMA3A/SEMA3C	7
BP	GO:1905207	regulation of cardiocyte differentiation	4/297	33/18870	0.00171727	0.0180391	0.0139292	DKK1/EFNB2/EGFR/TBX5	4
BP	GO:0050807	regulation of synapse organization	11/297	244/18870	0.00174649	0.0182911	0.0141238	AMIGO2/CDH2/DKK1/FLRT2/KIF1A/NEFL/SHANK2/SLC7A11/SLITRK6/ST8SIA2/WNT7A	11
BP	GO:0009582	detection of abiotic stimulus	8/297	141/18870	0.00178319	0.0184555	0.0142508	ABCA4/ANO1/CDH2/CHRNA9/CNGB1/NTSR1/SCN9A/SERPINE2	8
BP	GO:0046887	positive regulation of hormone secretion	8/297	141/18870	0.00178319	0.0184555	0.0142508	ANO1/FOXL2/GAL/GRP/INHBA/KISS1/NKX6-1/SCT	8
BP	GO:0001708	cell fate specification	7/297	110/18870	0.00178329	0.0184555	0.0142508	DKK1/FOXA2/FOXI3/GLI2/HOXA11/TBX5/WNT11	7
BP	GO:0014013	regulation of gliogenesis	7/297	110/18870	0.00178329	0.0184555	0.0142508	IL6/LIF/NKX6-1/NOG/SERPINE2/VEGFC/ZNF365	7
BP	GO:0016485	protein processing	11/297	245/18870	0.00180364	0.018611	0.0143708	BCHE/CCBE1/F3/MMP16/PCSK1N/PLAU/SCG5/SERPINE1/SERPINE2/THBS1/TLL1	11
BP	GO:0015711	organic anion transport	16/297	443/18870	0.00184782	0.0186335	0.0143882	FGF19/FOLR3/IL1A/NTSR1/SLC13A5/SLC16A2/SLC22A1/SLC22A3/SLC5A12/SLC6A11/SLC6A15/SLC6A17/SLC7A11/SLC7A8/SLCO1B3/THBS1	16
BP	GO:0001541	ovarian follicle development	5/297	56/18870	0.00185118	0.0186335	0.0143882	FOXL2/INHBA/NPR2/PTX3/VGF	5
BP	GO:0050433	regulation of catecholamine secretion	5/297	56/18870	0.00185118	0.0186335	0.0143882	ADRA2C/CHGA/GDNF/SYT13/SYT7	5
BP	GO:0010715	regulation of extracellular matrix disassembly	3/297	16/18870	0.0018567	0.0186335	0.0143882	FAP/IL6/PDPN	3
BP	GO:0021534	cell proliferation in hindbrain	3/297	16/18870	0.0018567	0.0186335	0.0143882	GLI1/LHX1/LHX5	3
BP	GO:0021924	cell proliferation in external granule layer	3/297	16/18870	0.0018567	0.0186335	0.0143882	GLI1/LHX1/LHX5	3
BP	GO:0021930	cerebellar granule cell precursor proliferation	3/297	16/18870	0.0018567	0.0186335	0.0143882	GLI1/LHX1/LHX5	3
BP	GO:0060841	venous blood vessel development	3/297	16/18870	0.0018567	0.0186335	0.0143882	CCBE1/EFNB2/SEMA3C	3
BP	GO:2000095	regulation of Wnt signaling pathway, planar cell polarity pathway	3/297	16/18870	0.0018567	0.0186335	0.0143882	DACT1/DKK1/NKD1	3
BP	GO:0007260	tyrosine phosphorylation of STAT protein	6/297	82/18870	0.00185909	0.0186335	0.0143882	CAV1/CSF2/IL24/IL31RA/IL6/LIF	6
BP	GO:0060351	cartilage development involved in endochondral bone morphogenesis	4/297	34/18870	0.00192241	0.0190508	0.0147104	COL2A1/HOXA11/MMP13/NPR2	4
BP	GO:0090183	regulation of kidney development	4/297	34/18870	0.00192241	0.0190508	0.0147104	BASP1/GDNF/LHX1/NOG	4
BP	GO:0045926	negative regulation of growth	11/297	247/18870	0.0019225	0.0190508	0.0147104	DCBLD2/INHBA/MT2A/NKD1/NOG/SEMA3A/SEMA3C/SERPINE2/STC2/TBX5/WNT11	11
BP	GO:0048738	cardiac muscle tissue development	11/297	247/18870	0.0019225	0.0190508	0.0147104	ANKRD1/DKK1/EFNB2/FOXC2/GLI1/MSC/NOG/NRG1/SCN5A/TBX5/YAP1	11
BP	GO:0001570	vasculogenesis	6/297	83/18870	0.00197799	0.0194901	0.0150497	CAV1/HAS2/NPR2/TBX5/WNT7A/YAP1	6
BP	GO:0014855	striated muscle cell proliferation	6/297	83/18870	0.00197799	0.0194901	0.0150497	FOXC2/GLI1/MYOG/NOG/TBX5/YAP1	6
BP	GO:0072132	mesenchyme morphogenesis	5/297	57/18870	0.00200348	0.0196859	0.0152009	ACTG2/FOXC2/NOG/SNAI2/WNT11	5
BP	GO:1901888	regulation of cell junction assembly	10/297	213/18870	0.00208003	0.0203466	0.015711	AMIGO2/CAV1/DKK1/FLRT2/SLITRK6/SNAI2/ST8SIA2/TBX5/THBS1/WNT7A	10
BP	GO:1902074	response to salt	14/297	366/18870	0.00208235	0.0203466	0.015711	CAV1/EN1/IL1A/MYOG/NEFL/NPR2/NT5E/SCN5A/SLC13A5/ST8SIA2/SYT13/SYT7/THBS1/TRPC1	14
BP	GO:0050803	regulation of synapse structure or activity	11/297	250/18870	0.00211271	0.0204857	0.0158184	AMIGO2/CDH2/DKK1/FLRT2/KIF1A/NEFL/SHANK2/SLC7A11/SLITRK6/ST8SIA2/WNT7A	11
BP	GO:0052548	regulation of endopeptidase activity	12/297	288/18870	0.00212533	0.0204857	0.0158184	BIRC2/CST4/F3/FOXL2/SERPINA5/SERPINE1/SERPINE2/SPOCK1/SPOCK3/THBS1/TIMP3/TIMP4	12
BP	GO:0030534	adult behavior	8/297	145/18870	0.00212587	0.0204857	0.0158184	EN1/FOXA2/GDNF/HOXB8/NTSR1/SHANK2/SLC7A11/SLITRK6	8
BP	GO:0050921	positive regulation of chemotaxis	8/297	145/18870	0.00212587	0.0204857	0.0158184	CDH13/DSCAM/F3/IL6/SCG2/SERPINE1/THBS1/VEGFC	8
BP	GO:2001235	positive regulation of apoptotic signaling pathway	8/297	145/18870	0.00212587	0.0204857	0.0158184	CAV1/CTSV/GSDME/INHBA/SRPX/THBS1/TIMP3/TNFRSF12A	8
BP	GO:0110110	positive regulation of animal organ morphogenesis	4/297	35/18870	0.0021439	0.0206027	0.0159088	DKK1/GDNF/HOXA11/WNT11	4
BP	GO:0001710	mesodermal cell fate commitment	3/297	17/18870	0.00222848	0.0212404	0.0164012	DKK1/FOXC2/HOXA11	3
BP	GO:0032274	gonadotropin secretion	3/297	17/18870	0.00222848	0.0212404	0.0164012	FOXL2/INHBA/KISS1	3
BP	GO:0050965	detection of temperature stimulus involved in sensory perception of pain	3/297	17/18870	0.00222848	0.0212404	0.0164012	ANO1/NTSR1/SCN9A	3
BP	GO:0001755	neural crest cell migration	5/297	59/18870	0.00233524	0.0220865	0.0170545	FGF19/FN1/GDNF/SEMA3A/SEMA3C	5
BP	GO:0060038	cardiac muscle cell proliferation	5/297	59/18870	0.00233524	0.0220865	0.0170545	FOXC2/GLI1/NOG/TBX5/YAP1	5
BP	GO:0050954	sensory perception of mechanical stimulus	9/297	181/18870	0.00233619	0.0220865	0.0170545	CHRNA9/COL2A1/GSDME/MYO7B/NPR2/SCN9A/SERPINE2/SLITRK6/SNAI2	9
BP	GO:0033273	response to vitamin	6/297	86/18870	0.00236933	0.0223394	0.0172498	BCHE/IL1A/MN1/SNAI2/STC2/TNC	6
BP	GO:0010092	specification of animal organ identity	4/297	36/18870	0.00238239	0.0223421	0.0172519	DKK1/GDNF/HOXA11/WNT11	4
BP	GO:1905332	positive regulation of morphogenesis of an epithelium	4/297	36/18870	0.00238239	0.0223421	0.0172519	GDNF/LHX1/LIF/NOG	4
BP	GO:0048708	astrocyte differentiation	6/297	87/18870	0.0025119	0.0234936	0.0181411	GAP43/IL6/LIF/NOG/SERPINE2/TSPAN2	6
BP	GO:0048771	tissue remodeling	9/297	184/18870	0.00260963	0.024268	0.018739	CAV1/CSPG4/FOXC2/IL1A/IL6/LIF/NPR2/SEMA3C/SYT7	9
BP	GO:0033280	response to vitamin D	4/297	37/18870	0.00263852	0.024268	0.018739	MN1/SNAI2/STC2/TNC	4
BP	GO:0010766	negative regulation of sodium ion transport	3/297	18/18870	0.00264325	0.024268	0.018739	GRP/HECW1/SERPINE2	3
BP	GO:0038128	ERBB2 signaling pathway	3/297	18/18870	0.00264325	0.024268	0.018739	AREG/EGFR/NRG1	3
BP	GO:0048339	paraxial mesoderm development	3/297	18/18870	0.00264325	0.024268	0.018739	FOXC2/WNT11/YAP1	3
BP	GO:0090190	positive regulation of branching involved in ureteric bud morphogenesis	3/297	18/18870	0.00264325	0.024268	0.018739	GDNF/LHX1/NOG	3
BP	GO:2000811	negative regulation of anoikis	3/297	18/18870	0.00264325	0.024268	0.018739	CAV1/ITGA5/SNAI2	3
BP	GO:0050432	catecholamine secretion	5/297	61/18870	0.00270524	0.0245878	0.018986	ADRA2C/CHGA/GDNF/SYT13/SYT7	5
BP	GO:0060350	endochondral bone morphogenesis	5/297	61/18870	0.00270524	0.0245878	0.018986	COL2A1/HOXA11/MMP13/MMP16/NPR2	5
BP	GO:0045766	positive regulation of angiogenesis	9/297	185/18870	0.00270621	0.0245878	0.018986	CCBE1/F3/FOXC2/HMGA2/IL1A/ITGA5/SERPINE1/THBS1/VEGFC	9
BP	GO:1904018	positive regulation of vasculature development	9/297	185/18870	0.00270621	0.0245878	0.018986	CCBE1/F3/FOXC2/HMGA2/IL1A/ITGA5/SERPINE1/THBS1/VEGFC	9
BP	GO:0071692	protein localization to extracellular region	14/297	377/18870	0.00272528	0.0246969	0.0190703	ANKRD1/ANO1/CHGA/FBN2/FOXA2/GAL/IL1A/IL6/NKX6-1/PTPRN/SCG2/SYT7/VEGFC/VGF	14
BP	GO:0048145	regulation of fibroblast proliferation	6/297	89/18870	0.00281626	0.0254555	0.019656	C1QL4/CAV1/EGFR/FN1/LIF/PDGFC	6
BP	GO:0090303	positive regulation of wound healing	5/297	62/18870	0.00290535	0.0261265	0.0201741	F3/FOXC2/PLAU/SERPINE1/THBS1	5
BP	GO:0040036	regulation of fibroblast growth factor receptor signaling pathway	4/297	38/18870	0.0029129	0.0261265	0.0201741	APLN/NOG/SULF2/THBS1	4
BP	GO:0045740	positive regulation of DNA replication	4/297	38/18870	0.0029129	0.0261265	0.0201741	BCAR3/EGFR/GLI1/GLI2	4
BP	GO:0090130	tissue migration	14/297	380/18870	0.00292648	0.0261812	0.0202163	ACTG2/CCBE1/CDH13/EFNB2/FAP/FOXC2/HAS2/ITGA3/LOXL2/SCG2/SNAI2/THBS1/VEGFC/WNT7A	14
BP	GO:0060602	branch elongation of an epithelium	3/297	19/18870	0.0031026	0.0276859	0.0213782	AREG/TNC/YAP1	3
BP	GO:0051965	positive regulation of synapse assembly	5/297	63/18870	0.00311594	0.0277342	0.0214156	AMIGO2/FLRT2/SLITRK6/ST8SIA2/WNT7A	5
BP	GO:0044060	regulation of endocrine process	4/297	39/18870	0.00320617	0.0284352	0.0219568	FOXL2/GAL/INHBA/KISS1	4
BP	GO:0007584	response to nutrient	8/297	155/18870	0.00321095	0.0284352	0.0219568	BCHE/FOXA2/IL1A/MN1/SHANK2/SNAI2/STC2/TNC	8
BP	GO:0030516	regulation of axon extension	6/297	92/18870	0.00332351	0.0293027	0.0226267	DSCAM/FN1/L1CAM/NKX6-1/SEMA3A/SEMA3C	6
BP	GO:0030225	macrophage differentiation	5/297	64/18870	0.00333731	0.0293027	0.0226267	CSF2/IL31RA/INHBA/LIF/TSPAN2	5
BP	GO:0046530	photoreceptor cell differentiation	5/297	64/18870	0.00333731	0.0293027	0.0226267	CNGB1/DIO3/DSCAM/NKD1/TH	5
BP	GO:0031099	regeneration	9/297	191/18870	0.00334667	0.0293027	0.0226267	GAP43/GLI1/IL6/MYMK/NEFL/SULF2/TNC/WNT7A/YAP1	9
BP	GO:0007613	memory	7/297	123/18870	0.00335079	0.0293027	0.0226267	CAMK2N1/ITGA3/ITGA5/JPH3/LRRN4/NGF/TH	7
BP	GO:0051146	striated muscle cell differentiation	12/297	305/18870	0.00339003	0.0295719	0.0228345	ADAMTS15/ANKRD1/CDH2/DKK1/DNER/EFNB2/MYH3/MYMK/MYOG/NRG1/POPDC3/TBX5	12
BP	GO:0042475	odontogenesis of dentin-containing tooth	6/297	93/18870	0.00350682	0.0305146	0.0235624	FOXI3/FST/GLI2/SCN5A/SERPINE1/TNC	6
BP	GO:0060421	positive regulation of heart growth	4/297	40/18870	0.00351893	0.030544	0.0235852	BASP1/GLI1/TBX5/YAP1	4
BP	GO:0010812	negative regulation of cell-substrate adhesion	5/297	65/18870	0.00356978	0.0309086	0.0238667	AJAP1/CORO2B/SERPINE1/SPOCK1/THBS1	5
BP	GO:0032332	positive regulation of chondrocyte differentiation	3/297	20/18870	0.00360797	0.0310091	0.0239443	GDF6/HOXA11/LOXL2	3
BP	GO:0042693	muscle cell fate commitment	3/297	20/18870	0.00360797	0.0310091	0.0239443	DKK1/MYOG/TBX5	3
BP	GO:0072079	nephron tubule formation	3/297	20/18870	0.00360797	0.0310091	0.0239443	GDNF/IRX1/NOG	3
BP	GO:0001756	somitogenesis	5/297	66/18870	0.00381364	0.0326164	0.0251855	DKK1/FOXC2/LHX1/NKD1/SEMA3C	5
BP	GO:0042531	positive regulation of tyrosine phosphorylation of STAT protein	5/297	66/18870	0.00381364	0.0326164	0.0251855	CSF2/IL24/IL31RA/IL6/LIF	5
BP	GO:0009410	response to xenobiotic stimulus	15/297	434/18870	0.00383095	0.0326481	0.0252099	ANKRD1/BCAR3/BCHE/GAL/ITGA3/NKX6-1/SEMA3C/SHANK2/SLC22A1/SLC6A11/SLC6A2/SLCO1B3/TH/THBS1/VEGFC	15
BP	GO:0090276	regulation of peptide hormone secretion	9/297	195/18870	0.00383602	0.0326481	0.0252099	ANO1/CHGA/FOXA2/GRP/IL6/KISS1/NKX6-1/SCT/SYT7	9
BP	GO:0007162	negative regulation of cell adhesion	12/297	312/18870	0.00406215	0.0344651	0.0266129	AJAP1/CDH13/CORO2B/DSCAM/MAD1L1/SERPINE1/SERPINE2/SNAI2/SPOCK1/TGFBI/THBS1/TNC	12
BP	GO:0070613	regulation of protein processing	5/297	67/18870	0.00406921	0.0344651	0.0266129	CCBE1/PLAU/SERPINE1/SERPINE2/THBS1	5
BP	GO:0045666	positive regulation of neuron differentiation	6/297	96/18870	0.00410195	0.0346585	0.0267623	ADRA2C/DKK1/GDF6/NAP1L2/NGF/NKX6-1	6
BP	GO:0050961	detection of temperature stimulus involved in sensory perception	3/297	21/18870	0.00416075	0.0348657	0.0269223	ANO1/NTSR1/SCN9A	3
BP	GO:0060973	cell migration involved in heart development	3/297	21/18870	0.00416075	0.0348657	0.0269223	SEMA3C/SNAI2/TBX5	3
BP	GO:0090189	regulation of branching involved in ureteric bud morphogenesis	3/297	21/18870	0.00416075	0.0348657	0.0269223	GDNF/LHX1/NOG	3
BP	GO:0070372	regulation of ERK1 and ERK2 cascade	12/297	313/18870	0.00416634	0.0348657	0.0269223	C1QL4/EGFR/FGF19/FN1/IL1A/INHBA/LIF/NECAB2/NRG1/PDGFC/ROS1/TIMP3	12
BP	GO:0045861	negative regulation of proteolysis	10/297	235/18870	0.00420319	0.0350246	0.0270449	CST4/PLAU/SERPINA5/SERPINE1/SERPINE2/SPOCK1/SPOCK3/THBS1/TIMP3/TIMP4	10
BP	GO:0071542	dopaminergic neuron differentiation	4/297	42/18870	0.00420535	0.0350246	0.0270449	DKK1/EN1/FOXA2/LMX1B	4
BP	GO:0002791	regulation of peptide secretion	9/297	198/18870	0.0042385	0.0352168	0.0271934	ANO1/CHGA/FOXA2/GRP/IL6/KISS1/NKX6-1/SCT/SYT7	9
BP	GO:0051952	regulation of amine transport	6/297	97/18870	0.004316	0.0356912	0.0275597	ADRA2C/CHGA/GDNF/NTSR1/SYT13/SYT7	6
BP	GO:0060419	heart growth	6/297	97/18870	0.004316	0.0356912	0.0275597	BASP1/FOXC2/GLI1/NOG/TBX5/YAP1	6
BP	GO:0030073	insulin secretion	9/297	199/18870	0.00437974	0.0361329	0.0279008	ANO1/CHGA/FOXA2/GAL/IL6/NKX6-1/PTPRN/SYT7/VGF	9
BP	GO:0090087	regulation of peptide transport	9/297	200/18870	0.00452464	0.0372404	0.0287559	ANO1/CHGA/FOXA2/GRP/IL6/KISS1/NKX6-1/SCT/SYT7	9
BP	GO:0048534	hematopoietic or lymphoid organ development	6/297	98/18870	0.00453818	0.0372642	0.0287743	BARX1/FOXI3/FOXL1/LRRC17/MAD1L1/PDPN	6
BP	GO:0032835	glomerulus development	5/297	69/18870	0.00461666	0.0377315	0.0291351	BASP1/FOXC2/LHX1/NOG/SULF2	5
BP	GO:0050918	positive chemotaxis	5/297	69/18870	0.00461666	0.0377315	0.0291351	CDH13/F3/GDNF/SCG2/VEGFC	5
BP	GO:0007626	locomotory behavior	9/297	201/18870	0.00467324	0.0381048	0.0294234	DSCAM/EN1/FOXA2/GDNF/HOXB8/NTSR1/SHANK2/SLITRK6/TH	9
BP	GO:0010038	response to metal ion	13/297	359/18870	0.00470616	0.0382839	0.0295617	CAV1/EGFR/IL1A/LOXL2/MT2A/MYOG/SCN5A/SLC13A5/SYT13/SYT7/TH/THBS1/TRPC1	13
BP	GO:0010720	positive regulation of cell development	15/297	444/18870	0.00471712	0.0382839	0.0295617	DSCAM/FN1/GLI2/HOXA11/IL6/L1CAM/LIF/MYOG/NEFL/NGF/NKX6-1/PROC/SERPINE2/VEGFC/ZNF365	15
BP	GO:0048588	developmental cell growth	10/297	239/18870	0.00472803	0.0382839	0.0295617	DSCAM/FN1/FOXL2/L1CAM/NGF/NKX6-1/NPR2/SEMA3A/SEMA3C/ST8SIA2	10
BP	GO:0071305	cellular response to vitamin D	3/297	22/18870	0.00476218	0.0383467	0.0296102	MN1/SNAI2/TNC	3
BP	GO:0072234	metanephric nephron tubule development	3/297	22/18870	0.00476218	0.0383467	0.0296102	LIF/SLC22A1/YAP1	3
BP	GO:0046620	regulation of organ growth	6/297	99/18870	0.00476867	0.0383467	0.0296102	BASP1/FOXC2/GLI1/NOG/TBX5/YAP1	6
BP	GO:0050804	modulation of chemical synaptic transmission	16/297	489/18870	0.00484585	0.038878	0.0300204	BCHE/CDH2/DKK1/GRIA3/JPH3/KISS1/NEFL/NGF/NOG/SCT/SERPINE2/SHANK2/SLC7A11/SYT7/VGF/WNT7A	16
BP	GO:0001736	establishment of planar polarity	5/297	70/18870	0.00490915	0.0392059	0.0302737	DACT1/DKK1/NKD1/WNT11/WNT7A	5
BP	GO:0007164	establishment of tissue polarity	5/297	70/18870	0.00490915	0.0392059	0.0302737	DACT1/DKK1/NKD1/WNT11/WNT7A	5
BP	GO:0042476	odontogenesis	7/297	132/18870	0.00493679	0.0392732	0.0303256	FOXI3/FST/GLI2/INHBA/SCN5A/SERPINE1/TNC	7
BP	GO:0099177	regulation of trans-synaptic signaling	16/297	490/18870	0.00494003	0.0392732	0.0303256	BCHE/CDH2/DKK1/GRIA3/JPH3/KISS1/NEFL/NGF/NOG/SCT/SERPINE2/SHANK2/SLC7A11/SYT7/VGF/WNT7A	16
BP	GO:0071526	semaphorin-plexin signaling pathway	4/297	44/18870	0.00497684	0.0394762	0.0304823	GDNF/NCAM1/SEMA3A/SEMA3C	4
BP	GO:0060349	bone morphogenesis	6/297	100/18870	0.00500767	0.0395526	0.0305413	COL2A1/HAS2/HOXA11/MMP13/MMP16/NPR2	6
BP	GO:0042445	hormone metabolic process	10/297	241/18870	0.00500909	0.0395526	0.0305413	BCHE/DHRS2/DIO3/DKK3/GAL/LHB/PCSK1N/SCG5/SLC16A2/STC2	10
BP	GO:0048593	camera-type eye morphogenesis	7/297	133/18870	0.00514278	0.0405168	0.0312859	BCAR3/DIO3/DSCAM/LHX1/SIX3/TENM3/TH	7
BP	GO:0003208	cardiac ventricle morphogenesis	5/297	71/18870	0.00521454	0.0407161	0.0314398	FOXC2/NOG/NRG1/SEMA3C/TBX5	5
BP	GO:0060420	regulation of heart growth	5/297	71/18870	0.00521454	0.0407161	0.0314398	BASP1/GLI1/NOG/TBX5/YAP1	5
BP	GO:1903317	regulation of protein maturation	5/297	71/18870	0.00521454	0.0407161	0.0314398	CCBE1/PLAU/SERPINE1/SERPINE2/THBS1	5
BP	GO:0007156	homophilic cell adhesion via plasma membrane adhesion molecules	8/297	168/18870	0.00521464	0.0407161	0.0314398	AMIGO2/CDH13/CDH2/DSCAM/L1CAM/PCDHGB1/PCDHGB6/TENM3	8
BP	GO:0003333	amino acid transmembrane transport	6/297	101/18870	0.00525534	0.0409425	0.0316146	NTSR1/SLC16A2/SLC6A11/SLC6A15/SLC7A11/SLC7A8	6
BP	GO:0045687	positive regulation of glial cell differentiation	4/297	45/18870	0.0053959	0.0418017	0.0322781	LIF/NKX6-1/SERPINE2/ZNF365	4
BP	GO:0061042	vascular wound healing	3/297	23/18870	0.00541343	0.0418017	0.0322781	FOXC2/NPR2/SERPINE1	3
BP	GO:0072574	hepatocyte proliferation	3/297	23/18870	0.00541343	0.0418017	0.0322781	GLI1/IL6/SULF2	3
BP	GO:0072575	epithelial cell proliferation involved in liver morphogenesis	3/297	23/18870	0.00541343	0.0418017	0.0322781	GLI1/IL6/SULF2	3
BP	GO:0044703	multi-organism reproductive process	9/297	206/18870	0.0054741	0.0421771	0.0325679	ITGA3/ITGA5/LIF/PSG4/PSG5/PTHLH/RXFP1/SERPINE2/STC2	9
BP	GO:0043542	endothelial cell migration	11/297	284/18870	0.00553856	0.0425799	0.032879	CCBE1/CDH13/EFNB2/FAP/FOXC2/LOXL2/SCG2/SNAI2/THBS1/VEGFC/WNT7A	11
BP	GO:0009306	protein secretion	13/297	368/18870	0.00576549	0.0442274	0.0341511	ANKRD1/ANO1/CHGA/FOXA2/GAL/IL1A/IL6/NKX6-1/PTPRN/SCG2/SYT7/VEGFC/VGF	13
BP	GO:0008016	regulation of heart contraction	9/297	208/18870	0.00582264	0.0445681	0.0344141	APLN/CAV1/CHGA/MYL4/SCN4B/SCN5A/TBX5/TH/TRPC1	9
BP	GO:0031018	endocrine pancreas development	4/297	46/18870	0.00583791	0.0445874	0.0344291	CDH2/FOXA2/IL6/NKX6-1	4
BP	GO:0002067	glandular epithelial cell differentiation	5/297	73/18870	0.00586525	0.0446985	0.0345149	CAV1/CDH2/IL31RA/NKX6-1/YAP1	5
BP	GO:0035592	establishment of protein localization to extracellular region	13/297	369/18870	0.00589409	0.0448207	0.0346092	ANKRD1/ANO1/CHGA/FOXA2/GAL/IL1A/IL6/NKX6-1/PTPRN/SCG2/SYT7/VEGFC/VGF	13
BP	GO:0033002	muscle cell proliferation	10/297	247/18870	0.00593161	0.0450082	0.034754	APLN/CDH13/FOXC2/GLI1/IL6/MYOG/NOG/TBX5/THBS1/YAP1	10
BP	GO:0051048	negative regulation of secretion	8/297	172/18870	0.00599134	0.045363	0.035028	ADRA2C/CHGA/IL11/IL13RA2/INHBA/LIF/NRG1/SCT	8
BP	GO:0016048	detection of temperature stimulus	3/297	24/18870	0.00611558	0.046005	0.0355237	ANO1/NTSR1/SCN9A	3
BP	GO:0040037	negative regulation of fibroblast growth factor receptor signaling pathway	3/297	24/18870	0.00611558	0.046005	0.0355237	APLN/SULF2/THBS1	3
BP	GO:2000209	regulation of anoikis	3/297	24/18870	0.00611558	0.046005	0.0355237	CAV1/ITGA5/SNAI2	3
BP	GO:0010631	epithelial cell migration	13/297	372/18870	0.00629371	0.0470134	0.0363024	CCBE1/CDH13/EFNB2/FAP/FOXC2/HAS2/ITGA3/LOXL2/SCG2/SNAI2/THBS1/VEGFC/WNT7A	13
BP	GO:0003254	regulation of membrane depolarization	4/297	47/18870	0.0063034	0.0470134	0.0363024	MLLT11/NTSR1/SCN5A/TBX5	4
BP	GO:0050919	negative chemotaxis	4/297	47/18870	0.0063034	0.0470134	0.0363024	FLRT2/NRG1/SEMA3A/SEMA3C	4
BP	GO:0060043	regulation of cardiac muscle cell proliferation	4/297	47/18870	0.0063034	0.0470134	0.0363024	GLI1/NOG/TBX5/YAP1	4
BP	GO:0048813	dendrite morphogenesis	7/297	139/18870	0.0065172	0.0485046	0.0374538	DSCAM/HECW1/IGF2BP1/KIF1A/SEMA3A/WNT7A/ZNF365	7
BP	GO:0032526	response to retinoic acid	6/297	106/18870	0.0066302	0.0492409	0.0380223	DKK1/RXRG/TNC/TRIML2/WNT11/YAP1	6
BP	GO:0090132	epithelium migration	13/297	375/18870	0.00671464	0.0497623	0.038425	CCBE1/CDH13/EFNB2/FAP/FOXC2/HAS2/ITGA3/LOXL2/SCG2/SNAI2/THBS1/VEGFC/WNT7A	13
BP	GO:0009612	response to mechanical stimulus	9/297	213/18870	0.00676907	0.0500242	0.0386272	ANKRD1/CDH2/CHRNA9/SCN9A/SERPINE2/SLITRK6/THBS1/TNC/WNT11	9
BP	GO:0001754	eye photoreceptor cell differentiation	4/297	48/18870	0.00679288	0.0500242	0.0386272	DIO3/DSCAM/NKD1/TH	4
BP	GO:0031670	cellular response to nutrient	4/297	48/18870	0.00679288	0.0500242	0.0386272	FOXA2/MN1/SNAI2/TNC	4
BP	GO:0008045	motor neuron axon guidance	3/297	25/18870	0.00686962	0.0500623	0.0386567	LHX1/NOG/SEMA3A	3
BP	GO:0035988	chondrocyte proliferation	3/297	25/18870	0.00686962	0.0500623	0.0386567	HMGA2/MMP16/NPR2	3
BP	GO:0072170	metanephric tubule development	3/297	25/18870	0.00686962	0.0500623	0.0386567	LIF/SLC22A1/YAP1	3
BP	GO:0072243	metanephric nephron epithelium development	3/297	25/18870	0.00686962	0.0500623	0.0386567	LIF/SLC22A1/YAP1	3
BP	GO:0072576	liver morphogenesis	3/297	25/18870	0.00686962	0.0500623	0.0386567	GLI1/IL6/SULF2	3
BP	GO:0048144	fibroblast proliferation	6/297	107/18870	0.00693374	0.0504246	0.0389364	C1QL4/CAV1/EGFR/FN1/LIF/PDGFC	6
BP	GO:0002064	epithelial cell development	9/297	214/18870	0.00697176	0.0505958	0.0390686	CDH2/FOXC2/IL1A/NKX6-1/PROC/ROS1/SIX3/WNT7A/YAP1	9
BP	GO:0035265	organ growth	8/297	177/18870	0.00708244	0.0512927	0.0396067	BASP1/FOXC2/GLI1/MMP13/NOG/NPR2/TBX5/YAP1	8
BP	GO:0060348	bone development	9/297	215/18870	0.00717906	0.051885	0.0400641	COL2A1/HAS2/HOXA11/LRRC17/MMP13/MMP16/NPR2/PDGFC/SULF2	9
BP	GO:0070371	ERK1 and ERK2 cascade	12/297	336/18870	0.00721768	0.0520566	0.0401966	C1QL4/EGFR/FGF19/FN1/IL1A/INHBA/LIF/NECAB2/NRG1/PDGFC/ROS1/TIMP3	12
BP	GO:0003279	cardiac septum development	6/297	108/18870	0.00724722	0.0521621	0.040278	ADAMTS6/NOG/SALL1/SEMA3C/TBX5/WNT11	6
BP	GO:0032924	activin receptor signaling pathway	4/297	49/18870	0.00730687	0.0523453	0.0404195	FST/FSTL3/GDF6/INHBA	4
BP	GO:0072337	modified amino acid transport	4/297	49/18870	0.00730687	0.0523453	0.0404195	FOLR3/PDZK1/SLC22A1/SLC7A11	4
BP	GO:0060538	skeletal muscle organ development	8/297	178/18870	0.00731757	0.0523453	0.0404195	ANKRD1/BASP1/CAV1/DNER/FOXL2/MSC/MYOG/POPDC3	8
BP	GO:1903036	positive regulation of response to wounding	5/297	77/18870	0.0073345	0.0523593	0.0404303	F3/FOXC2/PLAU/SERPINE1/THBS1	5
BP	GO:0003015	heart process	10/297	255/18870	0.00736195	0.0524483	0.040499	APLN/CAV1/CHGA/MYL4/SCN4B/SCN5A/TBX5/TH/TRPC1/YAP1	10
BP	GO:0044706	multi-multicellular organism process	9/297	216/18870	0.00739105	0.0525486	0.0405765	ITGA3/ITGA5/LIF/PSG4/PSG5/PTHLH/RXFP1/SERPINE2/STC2	9
BP	GO:0045927	positive regulation of growth	10/297	256/18870	0.00755801	0.0535004	0.0413115	BASP1/DIO3/DSCAM/EGFR/FN1/GLI1/L1CAM/NGF/TBX5/YAP1	10
BP	GO:0090101	negative regulation of transmembrane receptor protein serine/threonine kinase signaling pathway	8/297	179/18870	0.00755853	0.0535004	0.0413115	DKK1/FBN2/FST/FSTL3/NOG/PEG10/PMEPA1/VEPH1	8
BP	GO:0006939	smooth muscle contraction	6/297	109/18870	0.00757082	0.0535004	0.0413115	ADRA2C/CAV1/GDNF/HTR1D/HTR7/SULF2	6
BP	GO:0002026	regulation of the force of heart contraction	3/297	26/18870	0.00767643	0.0536018	0.0413897	CAV1/CHGA/MYL4	3
BP	GO:0021697	cerebellar cortex formation	3/297	26/18870	0.00767643	0.0536018	0.0413897	LHX1/LHX5/WNT7A	3
BP	GO:0061311	cell surface receptor signaling pathway involved in heart development	3/297	26/18870	0.00767643	0.0536018	0.0413897	DKK1/SNAI2/WNT11	3
BP	GO:0062149	detection of stimulus involved in sensory perception of pain	3/297	26/18870	0.00767643	0.0536018	0.0413897	ANO1/NTSR1/SCN9A	3
BP	GO:2000050	regulation of non-canonical Wnt signaling pathway	3/297	26/18870	0.00767643	0.0536018	0.0413897	DACT1/DKK1/NKD1	3
BP	GO:0051051	negative regulation of transport	15/297	469/18870	0.0076771	0.0536018	0.0413897	ADRA2C/CAV1/CHGA/GRP/HECW1/IL11/IL13RA2/INHBA/LIF/NECAB2/NRG1/NTSR1/SCT/SERPINE2/THBS1	15
BP	GO:0050772	positive regulation of axonogenesis	5/297	78/18870	0.00773845	0.0539225	0.0416374	DSCAM/FN1/L1CAM/NEFL/NGF	5
BP	GO:0001666	response to hypoxia	11/297	298/18870	0.00783897	0.0543178	0.0419426	BIRC2/CAV1/DIO3/IL1A/LIF/LOXL2/PLAU/STC2/TH/THBS1/VEGFC	11
BP	GO:0030850	prostate gland development	4/297	50/18870	0.00784586	0.0543178	0.0419426	GLI1/HOXA11/NOG/TNC	4
BP	GO:0089718	amino acid import across plasma membrane	4/297	50/18870	0.00784586	0.0543178	0.0419426	NTSR1/SLC16A2/SLC7A11/SLC7A8	4
BP	GO:1904019	epithelial cell apoptotic process	7/297	144/18870	0.00785729	0.0543178	0.0419426	IL6/SCG2/SERPINE1/SIX3/THBS1/WNT11/YAP1	7
BP	GO:1903522	regulation of blood circulation	10/297	258/18870	0.0079622	0.0549344	0.0424188	ADRA2C/APLN/CAV1/CHGA/MYL4/SCN4B/SCN5A/TBX5/TH/TRPC1	10
BP	GO:0007601	visual perception	9/297	219/18870	0.00805582	0.055471	0.0428331	ABCA4/CNGB1/COL2A1/SFRP5/SIX3/SLITRK6/TGFBI/TH/TIMP3	9
BP	GO:0021536	diencephalon development	5/297	79/18870	0.00815762	0.0560616	0.0432891	GLI1/GLI2/NOG/SALL1/SIX3	5
BP	GO:0010717	regulation of epithelial to mesenchymal transition	6/297	111/18870	0.00824908	0.056579	0.0436886	FOXA2/IL6/LOXL2/NOG/PDPN/TBX5	6
BP	GO:0001974	blood vessel remodeling	4/297	51/18870	0.00841032	0.0574596	0.0443686	FOXC2/LIF/NPR2/SEMA3C	4
BP	GO:0046622	positive regulation of organ growth	4/297	51/18870	0.00841032	0.0574596	0.0443686	BASP1/GLI1/TBX5/YAP1	4
BP	GO:0070482	response to oxygen levels	12/297	343/18870	0.00843175	0.0574937	0.0443949	BIRC2/CAV1/DIO3/IL1A/LIF/LOXL2/PDPN/PLAU/STC2/TH/THBS1/VEGFC	12
BP	GO:0045745	positive regulation of G protein-coupled receptor signaling pathway	3/297	27/18870	0.00853685	0.0578719	0.044687	CHGA/GRP/NECAB2	3
BP	GO:0050951	sensory perception of temperature stimulus	3/297	27/18870	0.00853685	0.0578719	0.044687	ANO1/NTSR1/SCN9A	3
BP	GO:0090330	regulation of platelet aggregation	3/297	27/18870	0.00853685	0.0578719	0.044687	IL6/PDPN/SERPINE2	3
BP	GO:0019827	stem cell population maintenance	8/297	183/18870	0.00858257	0.0580693	0.0448394	CDH2/HMGA2/IGF2BP1/LIF/LOXL2/NOG/WNT7A/YAP1	8
BP	GO:1904035	regulation of epithelial cell apoptotic process	6/297	113/18870	0.00896995	0.0602746	0.0465422	IL6/SCG2/SERPINE1/THBS1/WNT11/YAP1	6
BP	GO:0002066	columnar/cuboidal epithelial cell development	4/297	52/18870	0.00900073	0.0602746	0.0465422	CDH2/NKX6-1/ROS1/YAP1	4
BP	GO:0003197	endocardial cushion development	4/297	52/18870	0.00900073	0.0602746	0.0465422	DKK1/NOG/SNAI2/TBX5	4
BP	GO:0035176	social behavior	4/297	52/18870	0.00900073	0.0602746	0.0465422	EN1/GRP/SHANK2/TH	4
BP	GO:0060688	regulation of morphogenesis of a branching structure	4/297	52/18870	0.00900073	0.0602746	0.0465422	GDNF/LHX1/NOG/SNAI2	4
BP	GO:0050953	sensory perception of light stimulus	9/297	223/18870	0.00901189	0.0602746	0.0465422	ABCA4/CNGB1/COL2A1/SFRP5/SIX3/SLITRK6/TGFBI/TH/TIMP3	9
BP	GO:0048644	muscle organ morphogenesis	5/297	81/18870	0.00904272	0.0603654	0.0466124	ANKRD1/FOXC2/LIF/NOG/NRG1	5
BP	GO:0007224	smoothened signaling pathway	7/297	148/18870	0.00906778	0.0604173	0.0466525	DISP2/GLI1/GLI2/NKX6-1/NOG/RFX8/SERPINE2	7
BP	GO:0051963	regulation of synapse assembly	6/297	114/18870	0.00934679	0.0621579	0.0479965	AMIGO2/DKK1/FLRT2/SLITRK6/ST8SIA2/WNT7A	6
BP	GO:0001963	synaptic transmission, dopaminergic	3/297	28/18870	0.00945159	0.0624984	0.0482595	GDNF/SLC6A2/TH	3
BP	GO:0030325	adrenal gland development	3/297	28/18870	0.00945159	0.0624984	0.0482595	DKK3/SALL1/WNT11	3
BP	GO:0034698	response to gonadotropin	3/297	28/18870	0.00945159	0.0624984	0.0482595	INHBA/ITGA3/NPR2	3
BP	GO:0048146	positive regulation of fibroblast proliferation	4/297	53/18870	0.00961752	0.063237	0.0488298	EGFR/FN1/LIF/PDGFC	4
BP	GO:0050982	detection of mechanical stimulus	4/297	53/18870	0.00961752	0.063237	0.0488298	CDH2/CHRNA9/SCN9A/SERPINE2	4
BP	GO:0060390	regulation of SMAD protein signal transduction	4/297	53/18870	0.00961752	0.063237	0.0488298	GDF6/INHBA/PMEPA1/VEPH1	4
BP	GO:0008361	regulation of cell size	8/297	187/18870	0.00970715	0.0635305	0.0490564	DSCAM/FN1/L1CAM/NGF/NKX6-1/SCT/SEMA3A/SEMA3C	8
BP	GO:0098727	maintenance of cell number	8/297	187/18870	0.00970715	0.0635305	0.0490564	CDH2/HMGA2/IGF2BP1/LIF/LOXL2/NOG/WNT7A/YAP1	8
BP	GO:0006865	amino acid transport	7/297	150/18870	0.00972184	0.0635305	0.0490564	NTSR1/SLC16A2/SLC6A11/SLC6A15/SLC6A17/SLC7A11/SLC7A8	7
BP	GO:0048640	negative regulation of developmental growth	6/297	115/18870	0.0097348	0.0635305	0.0490564	NKD1/NOG/SEMA3A/SEMA3C/STC2/TBX5	6
BP	GO:0006936	muscle contraction	12/297	351/18870	0.0100089	0.0651975	0.0503436	ADRA2C/CAV1/CHGA/CHRNG/GDNF/HTR1D/HTR7/MYH3/MYL4/SCN4B/SCN5A/SULF2	12
BP	GO:0014012	peripheral nervous system axon regeneration	2/297	10/18870	0.0102212	0.0653798	0.0504843	NEFL/TNC	2
BP	GO:0032275	luteinizing hormone secretion	2/297	10/18870	0.0102212	0.0653798	0.0504843	FOXL2/KISS1	2
BP	GO:0042756	drinking behavior	2/297	10/18870	0.0102212	0.0653798	0.0504843	APLN/EN1	2
BP	GO:0048340	paraxial mesoderm morphogenesis	2/297	10/18870	0.0102212	0.0653798	0.0504843	FOXC2/WNT11	2
BP	GO:0048703	embryonic viscerocranium morphogenesis	2/297	10/18870	0.0102212	0.0653798	0.0504843	FOXC2/LHX1	2
BP	GO:0070562	regulation of vitamin D receptor signaling pathway	2/297	10/18870	0.0102212	0.0653798	0.0504843	MN1/SNAI2	2
BP	GO:0072172	mesonephric tubule formation	2/297	10/18870	0.0102212	0.0653798	0.0504843	GDNF/NOG	2
BP	GO:1903596	regulation of gap junction assembly	2/297	10/18870	0.0102212	0.0653798	0.0504843	CAV1/TBX5	2
BP	GO:2000826	regulation of heart morphogenesis	2/297	10/18870	0.0102212	0.0653798	0.0504843	DKK1/WNT11	2
BP	GO:0051703	biological process involved in intraspecies interaction between organisms	4/297	54/18870	0.0102611	0.0653798	0.0504843	EN1/GRP/SHANK2/TH	4
BP	GO:0060425	lung morphogenesis	4/297	54/18870	0.0102611	0.0653798	0.0504843	LIF/NOG/TNC/YAP1	4
BP	GO:0072348	sulfur compound transport	4/297	54/18870	0.0102611	0.0653798	0.0504843	SLC22A1/SLC35F3/SLC6A11/SLC7A11	4
BP	GO:0015697	quaternary ammonium group transport	3/297	29/18870	0.0104213	0.0660396	0.0509938	PDZK1/SLC22A1/SLC22A3	3
BP	GO:0072207	metanephric epithelium development	3/297	29/18870	0.0104213	0.0660396	0.0509938	LIF/SLC22A1/YAP1	3
BP	GO:0097421	liver regeneration	3/297	29/18870	0.0104213	0.0660396	0.0509938	GLI1/IL6/SULF2	3
BP	GO:0003018	vascular process in circulatory system	10/297	269/18870	0.010491	0.0663611	0.0512421	ADRA2C/CAV1/FOXC2/HTR1D/HTR7/SLC16A2/SLC22A1/SLC22A3/SLC6A17/SLC7A8	10
BP	GO:0002040	sprouting angiogenesis	8/297	190/18870	0.01062	0.0670553	0.0517781	CCBE1/CDH13/EFNB2/FOXC2/ITGA5/LOXL2/THBS1/VEGFC	8
BP	GO:0021543	pallium development	8/297	191/18870	0.0109379	0.0689385	0.0532322	CDH2/EGFR/FEZ1/IGF2BP1/LHX5/NEFL/SCT/TH	8
BP	GO:0031345	negative regulation of cell projection organization	8/297	192/18870	0.0112629	0.0708588	0.0547151	DKK1/EFNB2/ITGA3/SEMA3A/SEMA3C/SPOCK1/YAP1/ZNF365	8
BP	GO:0010894	negative regulation of steroid biosynthetic process	3/297	30/18870	0.0114467	0.0713733	0.0551123	DKK3/FGF19/SNAI2	3
BP	GO:0035640	exploration behavior	3/297	30/18870	0.0114467	0.0713733	0.0551123	ITGA3/JPH3/NOG	3
BP	GO:0060045	positive regulation of cardiac muscle cell proliferation	3/297	30/18870	0.0114467	0.0713733	0.0551123	GLI1/TBX5/YAP1	3
BP	GO:0071295	cellular response to vitamin	3/297	30/18870	0.0114467	0.0713733	0.0551123	MN1/SNAI2/TNC	3
BP	GO:0097205	renal filtration	3/297	30/18870	0.0114467	0.0713733	0.0551123	CORO2B/ITGA3/SULF2	3
BP	GO:0051961	negative regulation of nervous system development	7/297	155/18870	0.011507	0.071622	0.0553044	DKK1/IL6/NKX6-1/NOG/SEMA3A/SEMA3C/WNT7A	7
BP	GO:0036293	response to decreased oxygen levels	11/297	315/18870	0.0115631	0.0717161	0.055377	BIRC2/CAV1/DIO3/IL1A/LIF/LOXL2/PLAU/STC2/TH/THBS1/VEGFC	11
BP	GO:1904062	regulation of monoatomic cation transmembrane transport	11/297	315/18870	0.0115631	0.0717161	0.055377	CAV1/GAL/GRP/HECW1/JPH3/LRRC38/NTSR1/PDZK1/SCN4B/SCN5A/TRPC1	11
BP	GO:0030857	negative regulation of epithelial cell differentiation	4/297	56/18870	0.0116305	0.0718792	0.055503	CAV1/FST/IL1A/YAP1	4
BP	GO:0060986	endocrine hormone secretion	4/297	56/18870	0.0116305	0.0718792	0.055503	FOXL2/GAL/INHBA/KISS1	4
BP	GO:0046718	viral entry into host cell	7/297	156/18870	0.0118907	0.0733576	0.0566446	CAV1/CLDN6/EFNB2/EGFR/ITGA5/NCAM1/PTX3	7
BP	GO:0010232	vascular transport	5/297	87/18870	0.0120912	0.0735511	0.056794	SLC16A2/SLC22A1/SLC22A3/SLC6A17/SLC7A8	5
BP	GO:0150104	transport across blood-brain barrier	5/297	87/18870	0.0120912	0.0735511	0.056794	SLC16A2/SLC22A1/SLC22A3/SLC6A17/SLC7A8	5
BP	GO:0031667	response to nutrient levels	15/297	495/18870	0.0121692	0.0735511	0.056794	BCHE/FOXA2/GAST/IL1A/MN1/PCSK1N/SCT/SHANK2/SLC22A3/SNAI2/STC2/TH/TNC/VGF/WNT11	15
BP	GO:0007043	cell-cell junction assembly	7/297	157/18870	0.0122836	0.0735511	0.056794	CAV1/CDH13/CDH2/CLDN6/SNAI2/TBX5/WNT11	7
BP	GO:0048675	axon extension	6/297	121/18870	0.012307	0.0735511	0.056794	DSCAM/FN1/L1CAM/NKX6-1/SEMA3A/SEMA3C	6
BP	GO:0002448	mast cell mediated immunity	4/297	57/18870	0.0123571	0.0735511	0.056794	CHGA/GRP/IL13RA2/SPON2	4
BP	GO:1901016	regulation of potassium ion transmembrane transporter activity	4/297	57/18870	0.0123571	0.0735511	0.056794	CAV1/GAL/GRP/LRRC38	4
BP	GO:0001547	antral ovarian follicle growth	2/297	11/18870	0.0123636	0.0735511	0.056794	NPR2/PTX3	2
BP	GO:0002551	mast cell chemotaxis	2/297	11/18870	0.0123636	0.0735511	0.056794	CHGA/VEGFC	2
BP	GO:0019511	peptidyl-proline hydroxylation	2/297	11/18870	0.0123636	0.0735511	0.056794	P3H2/P4HA3	2
BP	GO:0021562	vestibulocochlear nerve development	2/297	11/18870	0.0123636	0.0735511	0.056794	NPR2/SLITRK6	2
BP	GO:0031943	regulation of glucocorticoid metabolic process	2/297	11/18870	0.0123636	0.0735511	0.056794	DKK3/GAL	2
BP	GO:0035878	nail development	2/297	11/18870	0.0123636	0.0735511	0.056794	ITGA6/RSPO4	2
BP	GO:0060923	cardiac muscle cell fate commitment	2/297	11/18870	0.0123636	0.0735511	0.056794	DKK1/TBX5	2
BP	GO:0072178	nephric duct morphogenesis	2/297	11/18870	0.0123636	0.0735511	0.056794	EFNB2/LHX1	2
BP	GO:0086016	AV node cell action potential	2/297	11/18870	0.0123636	0.0735511	0.056794	SCN4B/SCN5A	2
BP	GO:0086027	AV node cell to bundle of His cell signaling	2/297	11/18870	0.0123636	0.0735511	0.056794	SCN4B/SCN5A	2
BP	GO:0090009	primitive streak formation	2/297	11/18870	0.0123636	0.0735511	0.056794	FOXA2/LHX1	2
BP	GO:1901731	positive regulation of platelet aggregation	2/297	11/18870	0.0123636	0.0735511	0.056794	IL6/PDPN	2
BP	GO:1901844	regulation of cell communication by electrical coupling involved in cardiac conduction	2/297	11/18870	0.0123636	0.0735511	0.056794	CAV1/TBX5	2
BP	GO:2001241	positive regulation of extrinsic apoptotic signaling pathway in absence of ligand	2/297	11/18870	0.0123636	0.0735511	0.056794	INHBA/SRPX	2
BP	GO:0060325	face morphogenesis	3/297	31/18870	0.0125281	0.0742766	0.0573542	DKK1/MYH3/NOG	3
BP	GO:2000191	regulation of fatty acid transport	3/297	31/18870	0.0125281	0.0742766	0.0573542	IL1A/NTSR1/THBS1	3
BP	GO:0007605	sensory perception of sound	7/297	158/18870	0.0126858	0.0750842	0.0579778	CHRNA9/COL2A1/GSDME/MYO7B/NPR2/SLITRK6/SNAI2	7
BP	GO:0003012	muscle system process	14/297	452/18870	0.0127394	0.0752741	0.0581244	ADRA2C/CAV1/CHGA/CHRNG/GDNF/HTR1D/HTR7/MYH3/MYL4/MYMK/MYOG/SCN4B/SCN5A/SULF2	14
BP	GO:0003229	ventricular cardiac muscle tissue development	4/297	58/18870	0.0131121	0.077086	0.0595235	FOXC2/NOG/NRG1/TBX5	4
BP	GO:0015804	neutral amino acid transport	4/297	58/18870	0.0131121	0.077086	0.0595235	SLC6A15/SLC6A17/SLC7A11/SLC7A8	4
BP	GO:0086065	cell communication involved in cardiac conduction	4/297	58/18870	0.0131121	0.077086	0.0595235	CAV1/SCN4B/SCN5A/TBX5	4
BP	GO:0002088	lens development in camera-type eye	5/297	89/18870	0.0132452	0.0775724	0.0598992	BCAR3/SIX3/SLC7A11/SLITRK6/WNT7A	5
BP	GO:0055017	cardiac muscle tissue growth	5/297	89/18870	0.0132452	0.0775724	0.0598992	FOXC2/GLI1/NOG/TBX5/YAP1	5
BP	GO:0010811	positive regulation of cell-substrate adhesion	6/297	123/18870	0.0132614	0.0775724	0.0598992	CDH13/FN1/HAS2/ITGA3/ITGA5/ITGA6	6
BP	GO:0007178	transmembrane receptor protein serine/threonine kinase signaling pathway	13/297	410/18870	0.01347	0.0786614	0.06074	DKK1/DKK3/FBN2/FST/FSTL3/GDF6/INHBA/ITGA3/NOG/PEG10/PMEPA1/THBS1/VEPH1	13
BP	GO:0017015	regulation of transforming growth factor beta receptor signaling pathway	7/297	160/18870	0.0135184	0.0788121	0.0608564	DKK3/FBN2/ITGA3/PEG10/PMEPA1/THBS1/VEPH1	7
BP	GO:0007435	salivary gland morphogenesis	3/297	32/18870	0.013666	0.0790145	0.0610127	EGFR/SEMA3C/SNAI2	3
BP	GO:0060055	angiogenesis involved in wound healing	3/297	32/18870	0.013666	0.0790145	0.0610127	FOXC2/NPR2/SERPINE1	3
BP	GO:0060795	cell fate commitment involved in formation of primary germ layer	3/297	32/18870	0.013666	0.0790145	0.0610127	DKK1/FOXC2/HOXA11	3
BP	GO:0061036	positive regulation of cartilage development	3/297	32/18870	0.013666	0.0790145	0.0610127	GDF6/HOXA11/LOXL2	3
BP	GO:0140058	neuron projection arborization	3/297	32/18870	0.013666	0.0790145	0.0610127	IGF2BP1/SEMA3A/ZNF365	3
BP	GO:0038127	ERBB signaling pathway	6/297	124/18870	0.0137575	0.079412	0.0613196	AREG/BCAR3/CDH13/EGFR/NPR2/NRG1	6
BP	GO:0010574	regulation of vascular endothelial growth factor production	4/297	59/18870	0.0138959	0.0798157	0.0616314	CCBE1/IL1A/IL6/SULF2	4
BP	GO:0031638	zymogen activation	4/297	59/18870	0.0138959	0.0798157	0.0616314	PLAU/SERPINE1/SERPINE2/THBS1	4
BP	GO:0051480	regulation of cytosolic calcium ion concentration	4/297	59/18870	0.0138959	0.0798157	0.0616314	CAV1/CNGB1/SLC35G1/TRPC1	4
BP	GO:0071248	cellular response to metal ion	8/297	200/18870	0.0141245	0.0809961	0.0625428	EGFR/MT2A/MYOG/SCN5A/SLC13A5/SYT13/SYT7/TH	8
BP	GO:0002274	myeloid leukocyte activation	9/297	241/18870	0.0144118	0.0816067	0.0630143	CHGA/CSF2/DHRS2/FN1/GRP/IL13RA2/IL31RA/IL6/THBS1	9
BP	GO:0032535	regulation of cellular component size	12/297	370/18870	0.0146711	0.0816067	0.0630143	ADD2/DSCAM/FN1/KANK4/L1CAM/NEFL/NGF/NKX6-1/SCT/SEMA3A/SEMA3C/WNT7A	12
BP	GO:0001553	luteinization	2/297	12/18870	0.0146835	0.0816067	0.0630143	INHBA/PTPRN	2
BP	GO:0003306	Wnt signaling pathway involved in heart development	2/297	12/18870	0.0146835	0.0816067	0.0630143	DKK1/WNT11	2
BP	GO:0007501	mesodermal cell fate specification	2/297	12/18870	0.0146835	0.0816067	0.0630143	DKK1/HOXA11	2
BP	GO:0010749	regulation of nitric oxide mediated signal transduction	2/297	12/18870	0.0146835	0.0816067	0.0630143	EGFR/THBS1	2
BP	GO:0014831	gastro-intestinal system smooth muscle contraction	2/297	12/18870	0.0146835	0.0816067	0.0630143	HTR1D/SULF2	2
BP	GO:0014854	response to inactivity	2/297	12/18870	0.0146835	0.0816067	0.0630143	MYOG/SCN5A	2
BP	GO:0021527	spinal cord association neuron differentiation	2/297	12/18870	0.0146835	0.0816067	0.0630143	LHX1/LHX5	2
BP	GO:0022605	mammalian oogenesis stage	2/297	12/18870	0.0146835	0.0816067	0.0630143	NPR2/PTX3	2
BP	GO:0033629	negative regulation of cell adhesion mediated by integrin	2/297	12/18870	0.0146835	0.0816067	0.0630143	SERPINE1/SNAI2	2
BP	GO:0051583	dopamine uptake involved in synaptic transmission	2/297	12/18870	0.0146835	0.0816067	0.0630143	GDNF/SLC6A2	2
BP	GO:0051798	positive regulation of hair follicle development	2/297	12/18870	0.0146835	0.0816067	0.0630143	FST/GAL	2
BP	GO:0051934	catecholamine uptake involved in synaptic transmission	2/297	12/18870	0.0146835	0.0816067	0.0630143	GDNF/SLC6A2	2
BP	GO:0070327	thyroid hormone transport	2/297	12/18870	0.0146835	0.0816067	0.0630143	SLC16A2/SLC7A8	2
BP	GO:0070561	vitamin D receptor signaling pathway	2/297	12/18870	0.0146835	0.0816067	0.0630143	MN1/SNAI2	2
BP	GO:0071679	commissural neuron axon guidance	2/297	12/18870	0.0146835	0.0816067	0.0630143	GDNF/NCAM1	2
BP	GO:0086067	AV node cell to bundle of His cell communication	2/297	12/18870	0.0146835	0.0816067	0.0630143	SCN4B/SCN5A	2
BP	GO:1902305	regulation of sodium ion transmembrane transport	4/297	60/18870	0.0147088	0.0816067	0.0630143	GRP/HECW1/SCN4B/SCN5A	4
BP	GO:0044409	entry into host	7/297	163/18870	0.0148397	0.0816067	0.0630143	CAV1/CLDN6/EFNB2/EGFR/ITGA5/NCAM1/PTX3	7
BP	GO:1903844	regulation of cellular response to transforming growth factor beta stimulus	7/297	163/18870	0.0148397	0.0816067	0.0630143	DKK3/FBN2/ITGA3/PEG10/PMEPA1/THBS1/VEPH1	7
BP	GO:0002063	chondrocyte development	3/297	33/18870	0.0148609	0.0816067	0.0630143	HOXA11/PTHLH/SULF2	3
BP	GO:0045026	plasma membrane fusion	3/297	33/18870	0.0148609	0.0816067	0.0630143	FOLR3/MYMK/SERPINA5	3
BP	GO:0048566	embryonic digestive tract development	3/297	33/18870	0.0148609	0.0816067	0.0630143	GLI2/SALL1/SCT	3
BP	GO:0060914	heart formation	3/297	33/18870	0.0148609	0.0816067	0.0630143	DKK1/TBX5/WNT11	3
BP	GO:0099174	regulation of presynapse organization	3/297	33/18870	0.0148609	0.0816067	0.0630143	DKK1/SLITRK6/WNT7A	3
BP	GO:1905606	regulation of presynapse assembly	3/297	33/18870	0.0148609	0.0816067	0.0630143	DKK1/SLITRK6/WNT7A	3
BP	GO:0001935	endothelial cell proliferation	8/297	202/18870	0.0149159	0.0817804	0.0631484	APLN/CAV1/CDH13/F3/LOXL2/SCG2/THBS1/VEGFC	8
BP	GO:0060047	heart contraction	9/297	243/18870	0.0151335	0.0828435	0.0639693	APLN/CAV1/CHGA/MYL4/SCN4B/SCN5A/TBX5/TH/TRPC1	9
BP	GO:0003206	cardiac chamber morphogenesis	6/297	127/18870	0.0153233	0.083621	0.0645697	FOXC2/NOG/NRG1/SEMA3C/TBX5/WNT11	6
BP	GO:0090288	negative regulation of cellular response to growth factor stimulus	6/297	127/18870	0.0153233	0.083621	0.0645697	APLN/DKK1/FSTL3/NOG/SULF2/THBS1	6
BP	GO:0055008	cardiac muscle tissue morphogenesis	4/297	61/18870	0.0155511	0.0847319	0.0654274	ANKRD1/FOXC2/NOG/NRG1	4
BP	GO:0035051	cardiocyte differentiation	7/297	165/18870	0.0157703	0.0857923	0.0662463	DKK1/EFNB2/EGFR/INHBA/NRG1/SEMA3C/TBX5	7
BP	GO:0042692	muscle cell differentiation	13/297	419/18870	0.0158518	0.0859995	0.0664063	ACTN1/ADAMTS15/ANKRD1/CDH2/DKK1/DNER/EFNB2/MYH3/MYMK/MYOG/NRG1/POPDC3/TBX5	13
BP	GO:0048545	response to steroid hormone	11/297	330/18870	0.0158575	0.0859995	0.0664063	AREG/BCHE/CAV1/IL6/INHBA/NEFL/PMEPA1/RXRG/TH/THBS1/YAP1	11
BP	GO:0071560	cellular response to transforming growth factor beta stimulus	10/297	287/18870	0.0158906	0.0860452	0.0664416	ANKRD1/CAV1/DKK3/FBN2/ITGA3/PEG10/PMEPA1/THBS1/VEPH1/WNT7A	10
BP	GO:0007431	salivary gland development	3/297	34/18870	0.016113	0.0860509	0.066446	EGFR/SEMA3C/SNAI2	3
BP	GO:0034110	regulation of homotypic cell-cell adhesion	3/297	34/18870	0.016113	0.0860509	0.066446	IL6/PDPN/SERPINE2	3
BP	GO:0034405	response to fluid shear stress	3/297	34/18870	0.016113	0.0860509	0.066446	CSF2/HAS2/TFPI2	3
BP	GO:0043276	anoikis	3/297	34/18870	0.016113	0.0860509	0.066446	CAV1/ITGA5/SNAI2	3
BP	GO:0045939	negative regulation of steroid metabolic process	3/297	34/18870	0.016113	0.0860509	0.066446	DKK3/FGF19/SNAI2	3
BP	GO:0048265	response to pain	3/297	34/18870	0.016113	0.0860509	0.066446	SCN9A/SLC6A2/THBS1	3
BP	GO:0048841	regulation of axon extension involved in axon guidance	3/297	34/18870	0.016113	0.0860509	0.066446	DSCAM/SEMA3A/SEMA3C	3
BP	GO:0060317	cardiac epithelial to mesenchymal transition	3/297	34/18870	0.016113	0.0860509	0.066446	HAS2/NOG/SNAI2	3
BP	GO:0086019	cell-cell signaling involved in cardiac conduction	3/297	34/18870	0.016113	0.0860509	0.066446	SCN4B/SCN5A/TBX5	3
BP	GO:0007519	skeletal muscle tissue development	7/297	166/18870	0.0162508	0.0866543	0.0669119	ANKRD1/CAV1/DNER/FOXL2/MSC/MYOG/POPDC3	7
BP	GO:1903053	regulation of extracellular matrix organization	4/297	62/18870	0.0164233	0.0874407	0.0675191	FAP/HAS2/IL6/PDPN	4
BP	GO:0009791	post-embryonic development	5/297	94/18870	0.0164497	0.0874482	0.0675249	ALX4/DSCAM/LHX1/SCN9A/SEMA3C	5
BP	GO:0045444	fat cell differentiation	9/297	248/18870	0.0170539	0.0894005	0.0690325	C1QL4/GDF6/HMGA2/IL11/IL6/LAMB3/NPR2/SNAI2/YAP1	9
BP	GO:0072091	regulation of stem cell proliferation	5/297	95/18870	0.0171471	0.0894005	0.0690325	HMGA2/SNAI2/VEGFC/WNT11/YAP1	5
BP	GO:0014744	positive regulation of muscle adaptation	2/297	13/18870	0.0171747	0.0894005	0.0690325	MYMK/MYOG	2
BP	GO:0014874	response to stimulus involved in regulation of muscle adaptation	2/297	13/18870	0.0171747	0.0894005	0.0690325	MYOG/SCN5A	2
BP	GO:0015824	proline transport	2/297	13/18870	0.0171747	0.0894005	0.0690325	SLC6A15/SLC6A17	2
BP	GO:0015838	amino-acid betaine transport	2/297	13/18870	0.0171747	0.0894005	0.0690325	PDZK1/SLC22A1	2
BP	GO:0021681	cerebellar granular layer development	2/297	13/18870	0.0171747	0.0894005	0.0690325	SERPINE2/WNT7A	2
BP	GO:0021702	cerebellar Purkinje cell differentiation	2/297	13/18870	0.0171747	0.0894005	0.0690325	LHX1/LHX5	2
BP	GO:0032536	regulation of cell projection size	2/297	13/18870	0.0171747	0.0894005	0.0690325	NEFL/WNT7A	2
BP	GO:0033604	negative regulation of catecholamine secretion	2/297	13/18870	0.0171747	0.0894005	0.0690325	ADRA2C/CHGA	2
BP	GO:0048711	positive regulation of astrocyte differentiation	2/297	13/18870	0.0171747	0.0894005	0.0690325	LIF/SERPINE2	2
BP	GO:0051610	serotonin uptake	2/297	13/18870	0.0171747	0.0894005	0.0690325	SLC22A1/SLC22A3	2
BP	GO:0061029	eyelid development in camera-type eye	2/297	13/18870	0.0171747	0.0894005	0.0690325	EGFR/INHBA	2
BP	GO:0071285	cellular response to lithium ion	2/297	13/18870	0.0171747	0.0894005	0.0690325	MYOG/SLC13A5	2
BP	GO:0002090	regulation of receptor internalization	4/297	63/18870	0.0173254	0.0896515	0.0692262	APLN/DKK1/EFNB2/NECAB2	4
BP	GO:0010573	vascular endothelial growth factor production	4/297	63/18870	0.0173254	0.0896515	0.0692262	CCBE1/IL1A/IL6/SULF2	4
BP	GO:0021545	cranial nerve development	4/297	63/18870	0.0173254	0.0896515	0.0692262	CNGB1/NPR2/SALL1/SLITRK6	4
BP	GO:2000179	positive regulation of neural precursor cell proliferation	4/297	63/18870	0.0173254	0.0896515	0.0692262	GLI1/LHX1/LHX5/VEGFC	4
BP	GO:0002021	response to dietary excess	3/297	35/18870	0.0174226	0.0898884	0.0694092	PCSK1N/SCT/VGF	3
BP	GO:0050974	detection of mechanical stimulus involved in sensory perception	3/297	35/18870	0.0174226	0.0898884	0.0694092	CHRNA9/SCN9A/SERPINE2	3
BP	GO:1901654	response to ketone	8/297	208/18870	0.0174832	0.0900681	0.0695479	CAV1/HOXA11/INHBA/NEFL/TH/THBS1/TNC/YAP1	8
BP	GO:0071559	response to transforming growth factor beta	10/297	293/18870	0.0180835	0.0930236	0.0718301	ANKRD1/CAV1/DKK3/FBN2/ITGA3/PEG10/PMEPA1/THBS1/VEPH1/WNT7A	10
BP	GO:0046328	regulation of JNK cascade	6/297	132/18870	0.0182007	0.0934888	0.0721893	DACT1/EGFR/FGF19/IL1A/SEMA3A/WNT7A	6
BP	GO:0061337	cardiac conduction	5/297	97/18870	0.0186002	0.0954008	0.0736657	CAV1/SCN4B/SCN5A/TBX5/TRPC1	5
BP	GO:0016486	peptide hormone processing	3/297	36/18870	0.0187899	0.0958135	0.0739843	BCHE/PCSK1N/SCG5	3
BP	GO:0055023	positive regulation of cardiac muscle tissue growth	3/297	36/18870	0.0187899	0.0958135	0.0739843	GLI1/TBX5/YAP1	3
BP	GO:0009266	response to temperature stimulus	7/297	171/18870	0.0188097	0.0958135	0.0739843	ANO1/IL1A/NTSR1/PCSK1N/SCN9A/THBS1/VGF	7
BP	GO:0030048	actin filament-based movement	6/297	133/18870	0.0188176	0.0958135	0.0739843	CAV1/MYH3/MYO7B/PDPN/SCN4B/SCN5A	6
BP	GO:0030879	mammary gland development	6/297	133/18870	0.0188176	0.0958135	0.0739843	APLN/AREG/CAV1/GLI2/NRG1/RXFP1	6
BP	GO:0055021	regulation of cardiac muscle tissue growth	4/297	65/18870	0.0192211	0.0977261	0.0754612	GLI1/NOG/TBX5/YAP1	4
BP	GO:0048511	rhythmic process	10/297	296/18870	0.0192601	0.097782	0.0755044	CSF2/HAS2/HTR7/INHBA/KISS1/NPR2/PTPRN/PTX3/SCN9A/TH	10
BP	GO:0009798	axis specification	5/297	98/18870	0.0193562	0.0981274	0.0757711	BASP1/FOXA2/LHX1/SIX3/WNT7A	5
BP	GO:0002031	G protein-coupled receptor internalization	2/297	14/18870	0.0198313	0.0986769	0.0761954	APLN/NECAB2	2
BP	GO:0030213	hyaluronan biosynthetic process	2/297	14/18870	0.0198313	0.0986769	0.0761954	HAS1/HAS2	2
BP	GO:0050930	induction of positive chemotaxis	2/297	14/18870	0.0198313	0.0986769	0.0761954	SCG2/VEGFC	2
BP	GO:0051412	response to corticosterone	2/297	14/18870	0.0198313	0.0986769	0.0761954	NEFL/TH	2
BP	GO:0051608	histamine transport	2/297	14/18870	0.0198313	0.0986769	0.0761954	CSF2/SLC22A3	2
BP	GO:0060019	radial glial cell differentiation	2/297	14/18870	0.0198313	0.0986769	0.0761954	CDH2/GAP43	2
BP	GO:0061043	regulation of vascular wound healing	2/297	14/18870	0.0198313	0.0986769	0.0761954	FOXC2/SERPINE1	2
BP	GO:0070141	response to UV-A	2/297	14/18870	0.0198313	0.0986769	0.0761954	EGFR/MMP1	2
BP	GO:0097531	mast cell migration	2/297	14/18870	0.0198313	0.0986769	0.0761954	CHGA/VEGFC	2
BP	GO:1902043	positive regulation of extrinsic apoptotic signaling pathway via death domain receptors	2/297	14/18870	0.0198313	0.0986769	0.0761954	THBS1/TIMP3	2
BP	GO:1902047	polyamine transmembrane transport	2/297	14/18870	0.0198313	0.0986769	0.0761954	SLC22A1/SLC22A3	2
BP	GO:1905208	negative regulation of cardiocyte differentiation	2/297	14/18870	0.0198313	0.0986769	0.0761954	DKK1/EGFR	2
BP	GO:2000650	negative regulation of sodium ion transmembrane transporter activity	2/297	14/18870	0.0198313	0.0986769	0.0761954	GRP/HECW1	2
BP	GO:0003161	cardiac conduction system development	3/297	37/18870	0.020215	0.0988989	0.0763668	MSC/SCN5A/TBX5	3
BP	GO:0003230	cardiac atrium development	3/297	37/18870	0.020215	0.0988989	0.0763668	NOG/TBX5/WNT11	3
BP	GO:0008207	C21-steroid hormone metabolic process	3/297	37/18870	0.020215	0.0988989	0.0763668	DHRS2/DKK3/LHB	3
BP	GO:0014059	regulation of dopamine secretion	3/297	37/18870	0.020215	0.0988989	0.0763668	GDNF/SYT13/SYT7	3
BP	GO:0044319	wound healing, spreading of cells	3/297	37/18870	0.020215	0.0988989	0.0763668	ITGA5/PDPN/WNT7A	3
BP	GO:0045773	positive regulation of axon extension	3/297	37/18870	0.020215	0.0988989	0.0763668	DSCAM/FN1/L1CAM	3
BP	GO:0046688	response to copper ion	3/297	37/18870	0.020215	0.0988989	0.0763668	IL1A/LOXL2/MT2A	3
BP	GO:0051385	response to mineralocorticoid	3/297	37/18870	0.020215	0.0988989	0.0763668	INHBA/NEFL/TH	3
BP	GO:0060323	head morphogenesis	3/297	37/18870	0.020215	0.0988989	0.0763668	DKK1/MYH3/NOG	3
BP	GO:0070306	lens fiber cell differentiation	3/297	37/18870	0.020215	0.0988989	0.0763668	SIX3/SLC7A11/WNT7A	3
BP	GO:0090505	epiboly involved in wound healing	3/297	37/18870	0.020215	0.0988989	0.0763668	ITGA5/PDPN/WNT7A	3
BP	GO:0042446	hormone biosynthetic process	4/297	66/18870	0.0202152	0.0988989	0.0763668	DIO3/DKK3/LHB/STC2	4
BP	GO:0043086	negative regulation of catalytic activity	14/297	480/18870	0.0203312	0.0991617	0.0765698	CAMK2N1/CAV1/CST4/FOXA2/PPP4R4/PTX3/SERPINA5/SERPINE1/SERPINE2/SPOCK1/SPOCK3/THBS1/TIMP3/TIMP4	14
BP	GO:0043270	positive regulation of monoatomic ion transport	8/297	214/18870	0.020354	0.0991617	0.0765698	CAV1/GAL/LRRC38/NTSR1/PDZK1/SCN4B/SCN5A/TRPC1	8
BP	GO:0045216	cell-cell junction organization	8/297	214/18870	0.020354	0.0991617	0.0765698	CAV1/CDH13/CDH2/CLDN6/EFNB2/SNAI2/TBX5/WNT11	8
BP	GO:0007259	receptor signaling pathway via JAK-STAT	7/297	174/18870	0.0204739	0.0996075	0.076914	CAV1/CSF2/IFNK/IL24/IL31RA/IL6/LIF	7
BP	GO:0046888	negative regulation of hormone secretion	4/297	67/18870	0.0212403	0.103193	0.0796823	CHGA/IL11/INHBA/LIF	4
BP	GO:0010634	positive regulation of epithelial cell migration	7/297	176/18870	0.0216389	0.104258	0.080505	CCBE1/FOXC2/HAS2/ITGA3/THBS1/VEGFC/WNT7A	7
BP	GO:0042044	fluid transport	3/297	38/18870	0.0216981	0.104258	0.080505	AQP10/CSF2/HAS2	3
BP	GO:0048846	axon extension involved in axon guidance	3/297	38/18870	0.0216981	0.104258	0.080505	DSCAM/SEMA3A/SEMA3C	3
BP	GO:0060306	regulation of membrane repolarization	3/297	38/18870	0.0216981	0.104258	0.080505	CAV1/SCN4B/SCN5A	3
BP	GO:0060563	neuroepithelial cell differentiation	3/297	38/18870	0.0216981	0.104258	0.080505	CDH2/SERPINE1/WNT11	3
BP	GO:0086091	regulation of heart rate by cardiac conduction	3/297	38/18870	0.0216981	0.104258	0.080505	CAV1/SCN4B/SCN5A	3
BP	GO:0090504	epiboly	3/297	38/18870	0.0216981	0.104258	0.080505	ITGA5/PDPN/WNT7A	3
BP	GO:1902284	neuron projection extension involved in neuron projection guidance	3/297	38/18870	0.0216981	0.104258	0.080505	DSCAM/SEMA3A/SEMA3C	3
BP	GO:0001764	neuron migration	7/297	177/18870	0.0222382	0.106707	0.082396	DNER/FLRT2/ITGA3/LHX1/NKX6-1/SEMA3A/SPOCK1	7
BP	GO:0010226	response to lithium ion	2/297	15/18870	0.0226474	0.10721	0.082784	MYOG/SLC13A5	2
BP	GO:0010649	regulation of cell communication by electrical coupling	2/297	15/18870	0.0226474	0.10721	0.082784	CAV1/TBX5	2
BP	GO:0010838	positive regulation of keratinocyte proliferation	2/297	15/18870	0.0226474	0.10721	0.082784	AREG/HAS2	2
BP	GO:0015816	glycine transport	2/297	15/18870	0.0226474	0.10721	0.082784	SLC6A17/SLC7A8	2
BP	GO:0021694	cerebellar Purkinje cell layer formation	2/297	15/18870	0.0226474	0.10721	0.082784	LHX1/LHX5	2
BP	GO:0060026	convergent extension	2/297	15/18870	0.0226474	0.10721	0.082784	NKD1/WNT11	2
BP	GO:0086069	bundle of His cell to Purkinje myocyte communication	2/297	15/18870	0.0226474	0.10721	0.082784	SCN5A/TBX5	2
BP	GO:1902306	negative regulation of sodium ion transmembrane transport	2/297	15/18870	0.0226474	0.10721	0.082784	GRP/HECW1	2
BP	GO:2000052	positive regulation of non-canonical Wnt signaling pathway	2/297	15/18870	0.0226474	0.10721	0.082784	DKK1/NKD1	2
BP	GO:0042391	regulation of membrane potential	13/297	440/18870	0.0226495	0.10721	0.082784	CAV1/CHRNA9/CHRNG/CNGB1/GRIA3/MLLT11/NPR2/NTSR1/POPDC3/SCN4B/SCN5A/TBX5/WNT7A	13
BP	GO:0001941	postsynaptic membrane organization	3/297	39/18870	0.0232391	0.109408	0.0844818	CDH2/GDNF/SLC7A11	3
BP	GO:0032350	regulation of hormone metabolic process	3/297	39/18870	0.0232391	0.109408	0.0844818	DKK3/GAL/STC2	3
BP	GO:0099068	postsynapse assembly	3/297	39/18870	0.0232391	0.109408	0.0844818	CDH2/GAP43/WNT7A	3
BP	GO:0140448	signaling receptor ligand precursor processing	3/297	39/18870	0.0232391	0.109408	0.0844818	BCHE/PCSK1N/SCG5	3
BP	GO:0035019	somatic stem cell population maintenance	4/297	69/18870	0.0233848	0.109763	0.0847557	LIF/NOG/WNT7A/YAP1	4
BP	GO:0043627	response to estrogen	4/297	69/18870	0.0233848	0.109763	0.0847557	CAV1/GAL/HOXA11/WNT7A	4
BP	GO:0071772	response to BMP	7/297	179/18870	0.0234713	0.109763	0.0847557	COL2A1/DKK1/FST/FSTL3/GDF6/ITGA3/NOG	7
BP	GO:0071773	cellular response to BMP stimulus	7/297	179/18870	0.0234713	0.109763	0.0847557	COL2A1/DKK1/FST/FSTL3/GDF6/ITGA3/NOG	7
BP	GO:1990138	neuron projection extension	7/297	179/18870	0.0234713	0.109763	0.0847557	DSCAM/FN1/L1CAM/NKX6-1/SEMA3A/SEMA3C/ST8SIA2	7
BP	GO:0010977	negative regulation of neuron projection development	6/297	140/18870	0.0235393	0.109934	0.0848878	DKK1/EFNB2/SEMA3A/SEMA3C/SPOCK1/ZNF365	6
BP	GO:1904064	positive regulation of cation transmembrane transport	6/297	141/18870	0.024273	0.113209	0.087417	CAV1/GAL/LRRC38/NTSR1/PDZK1/TRPC1	6
BP	GO:0019218	regulation of steroid metabolic process	5/297	104/18870	0.0243166	0.113262	0.0874572	DKK3/FGF19/GAL/IL1A/SNAI2	5
BP	GO:0001936	regulation of endothelial cell proliferation	7/297	181/18870	0.0247508	0.114773	0.0886245	APLN/CAV1/CDH13/F3/SCG2/THBS1/VEGFC	7
BP	GO:0021953	central nervous system neuron differentiation	7/297	181/18870	0.0247508	0.114773	0.0886245	GLI2/INHBA/LHX1/LHX5/NKX6-1/SPOCK1/WNT7A	7
BP	GO:0001953	negative regulation of cell-matrix adhesion	3/297	40/18870	0.024838	0.114773	0.0886245	AJAP1/SERPINE1/THBS1	3
BP	GO:0009595	detection of biotic stimulus	3/297	40/18870	0.024838	0.114773	0.0886245	FAP/SRPX/YAP1	3
BP	GO:0032570	response to progesterone	3/297	40/18870	0.024838	0.114773	0.0886245	CAV1/THBS1/YAP1	3
BP	GO:0033028	myeloid cell apoptotic process	3/297	40/18870	0.024838	0.114773	0.0886245	IL6/SLC7A11/SNAI2	3
BP	GO:0070252	actin-mediated cell contraction	5/297	105/18870	0.0252156	0.116364	0.0898531	CAV1/MYH3/PDPN/SCN4B/SCN5A	5
BP	GO:0050708	regulation of protein secretion	9/297	266/18870	0.0254515	0.116985	0.0903321	ANKRD1/ANO1/CHGA/FOXA2/IL1A/IL6/NKX6-1/SYT7/VEGFC	9
BP	GO:0015846	polyamine transport	2/297	16/18870	0.0256176	0.116985	0.0903321	SLC22A1/SLC22A3	2
BP	GO:0032926	negative regulation of activin receptor signaling pathway	2/297	16/18870	0.0256176	0.116985	0.0903321	FST/FSTL3	2
BP	GO:0034112	positive regulation of homotypic cell-cell adhesion	2/297	16/18870	0.0256176	0.116985	0.0903321	IL6/PDPN	2
BP	GO:0060033	anatomical structure regression	2/297	16/18870	0.0256176	0.116985	0.0903321	GLI1/TH	2
BP	GO:0060044	negative regulation of cardiac muscle cell proliferation	2/297	16/18870	0.0256176	0.116985	0.0903321	NOG/TBX5	2
BP	GO:0060911	cardiac cell fate commitment	2/297	16/18870	0.0256176	0.116985	0.0903321	DKK1/TBX5	2
BP	GO:2000345	regulation of hepatocyte proliferation	2/297	16/18870	0.0256176	0.116985	0.0903321	GLI1/SULF2	2
BP	GO:0014046	dopamine secretion	3/297	41/18870	0.0264948	0.120519	0.093061	GDNF/SYT13/SYT7	3
BP	GO:0031952	regulation of protein autophosphorylation	3/297	41/18870	0.0264948	0.120519	0.093061	CAV1/PDGFC/VEGFC	3
BP	GO:1903115	regulation of actin filament-based movement	3/297	41/18870	0.0264948	0.120519	0.093061	CAV1/PDPN/SCN5A	3
BP	GO:0051592	response to calcium ion	6/297	144/18870	0.0265655	0.120683	0.0931882	CAV1/SCN5A/SYT13/SYT7/THBS1/TRPC1	6
BP	GO:0060411	cardiac septum morphogenesis	4/297	72/18870	0.0268399	0.121457	0.0937852	NOG/SEMA3C/TBX5/WNT11	4
BP	GO:0070527	platelet aggregation	4/297	72/18870	0.0268399	0.121457	0.0937852	IL6/PDPN/SERPINE2/SLC7A11	4
BP	GO:1904888	cranial skeletal system development	4/297	72/18870	0.0268399	0.121457	0.0937852	FOXC2/LHX1/MMP16/NOG	4
BP	GO:0002526	acute inflammatory response	5/297	107/18870	0.0270769	0.122213	0.0943693	F3/FN1/IL1A/IL31RA/IL6	5
BP	GO:0007173	epidermal growth factor receptor signaling pathway	5/297	107/18870	0.0270769	0.122213	0.0943693	AREG/BCAR3/CDH13/EGFR/NPR2	5
BP	GO:0007565	female pregnancy	7/297	186/18870	0.0281569	0.126671	0.0978113	ITGA3/ITGA5/LIF/PSG4/PSG5/PTHLH/STC2	7
BP	GO:0032872	regulation of stress-activated MAPK cascade	7/297	186/18870	0.0281569	0.126671	0.0978113	DACT1/EGFR/FGF19/GDF6/IL1A/SEMA3A/WNT7A	7
BP	GO:0000578	embryonic axis specification	3/297	42/18870	0.0282094	0.126671	0.0978113	BASP1/LHX1/WNT7A	3
BP	GO:0071634	regulation of transforming growth factor beta production	3/297	42/18870	0.0282094	0.126671	0.0978113	FN1/THBS1/WNT11	3
BP	GO:0034765	regulation of monoatomic ion transmembrane transport	13/297	454/18870	0.0282571	0.126722	0.0978511	CAV1/GAL/GRP/HECW1/JPH3/KCNF1/LRRC38/NTSR1/PDZK1/SCN4B/SCN5A/SCN9A/TRPC1	13
BP	GO:0001574	ganglioside biosynthetic process	2/297	17/18870	0.0287361	0.127562	0.0984996	B4GALNT1/ST8SIA2	2
BP	GO:0002076	osteoblast development	2/297	17/18870	0.0287361	0.127562	0.0984996	GLI2/PTHLH	2
BP	GO:0003128	heart field specification	2/297	17/18870	0.0287361	0.127562	0.0984996	DKK1/WNT11	2
BP	GO:0008228	opsonization	2/297	17/18870	0.0287361	0.127562	0.0984996	PTX3/SPON2	2
BP	GO:0010470	regulation of gastrulation	2/297	17/18870	0.0287361	0.127562	0.0984996	FOXA2/LHX1	2
BP	GO:0050872	white fat cell differentiation	2/297	17/18870	0.0287361	0.127562	0.0984996	NPR2/SNAI2	2
BP	GO:0051447	negative regulation of meiotic cell cycle	2/297	17/18870	0.0287361	0.127562	0.0984996	LIF/NPR2	2
BP	GO:0098712	L-glutamate import across plasma membrane	2/297	17/18870	0.0287361	0.127562	0.0984996	NTSR1/SLC7A11	2
BP	GO:0071241	cellular response to inorganic substance	8/297	229/18870	0.0289681	0.128429	0.0991692	EGFR/MT2A/MYOG/SCN5A/SLC13A5/SYT13/SYT7/TH	8
BP	GO:0090277	positive regulation of peptide hormone secretion	5/297	109/18870	0.0290236	0.128512	0.0992333	ANO1/GRP/KISS1/NKX6-1/SCT	5
BP	GO:0003281	ventricular septum development	4/297	74/18870	0.0293041	0.129263	0.0998132	NOG/SALL1/TBX5/WNT11	4
BP	GO:0045669	positive regulation of osteoblast differentiation	4/297	74/18870	0.0293041	0.129263	0.0998132	FBN2/GDPD2/IL6/YAP1	4
BP	GO:0060415	muscle tissue morphogenesis	4/297	74/18870	0.0293041	0.129263	0.0998132	ANKRD1/FOXC2/NOG/NRG1	4
BP	GO:0001505	regulation of neurotransmitter levels	7/297	188/18870	0.0296042	0.130095	0.100455	GDNF/SLC22A1/SLC22A3/SLC6A11/SLC6A2/SYT7/WNT7A	7
BP	GO:0044000	movement in host	7/297	188/18870	0.0296042	0.130095	0.100455	CAV1/CLDN6/EFNB2/EGFR/ITGA5/NCAM1/PTX3	7
BP	GO:0097696	receptor signaling pathway via STAT	7/297	188/18870	0.0296042	0.130095	0.100455	CAV1/CSF2/IFNK/IL24/IL31RA/IL6/LIF	7
BP	GO:0010712	regulation of collagen metabolic process	3/297	43/18870	0.0299816	0.13065	0.100884	FAP/IL6/INHBA	3
BP	GO:0010719	negative regulation of epithelial to mesenchymal transition	3/297	43/18870	0.0299816	0.13065	0.100884	FOXA2/NOG/TBX5	3
BP	GO:0060443	mammary gland morphogenesis	3/297	43/18870	0.0299816	0.13065	0.100884	AREG/CAV1/RXFP1	3
BP	GO:0099084	postsynaptic specialization organization	3/297	43/18870	0.0299816	0.13065	0.100884	CDH2/GAP43/SHANK2	3
BP	GO:1904037	positive regulation of epithelial cell apoptotic process	3/297	43/18870	0.0299816	0.13065	0.100884	IL6/THBS1/WNT11	3
BP	GO:0002444	myeloid leukocyte mediated immunity	5/297	110/18870	0.0300293	0.13065	0.100884	CHGA/GRP/IL13RA2/IL6/SPON2	5
BP	GO:0007218	neuropeptide signaling pathway	5/297	110/18870	0.0300293	0.13065	0.100884	GAL/GRP/NTSR1/PCSK1N/SCG5	5
BP	GO:0090263	positive regulation of canonical Wnt signaling pathway	5/297	110/18870	0.0300293	0.13065	0.100884	CAV1/DACT1/EGFR/SULF2/YAP1	5
BP	GO:0032412	regulation of monoatomic ion transmembrane transporter activity	8/297	231/18870	0.0302812	0.131582	0.101604	CAV1/GAL/GRP/HECW1/JPH3/LRRC38/PDZK1/SCN4B	8
BP	GO:0070302	regulation of stress-activated protein kinase signaling cascade	7/297	189/18870	0.0303463	0.131701	0.101696	DACT1/EGFR/FGF19/GDF6/IL1A/SEMA3A/WNT7A	7
BP	GO:0042246	tissue regeneration	4/297	75/18870	0.0305848	0.132572	0.102368	GAP43/MYMK/WNT7A/YAP1	4
BP	GO:0031960	response to corticosteroid	6/297	149/18870	0.0306975	0.132732	0.102491	AREG/BCHE/IL6/INHBA/NEFL/TH	6
BP	GO:0050768	negative regulation of neurogenesis	6/297	149/18870	0.0306975	0.132732	0.102491	IL6/NKX6-1/NOG/SEMA3A/SEMA3C/WNT7A	6
BP	GO:0001938	positive regulation of endothelial cell proliferation	5/297	111/18870	0.0310566	0.133788	0.103307	APLN/CDH13/F3/SCG2/VEGFC	5
BP	GO:0002793	positive regulation of peptide secretion	5/297	111/18870	0.0310566	0.133788	0.103307	ANO1/GRP/KISS1/NKX6-1/SCT	5
BP	GO:0060840	artery development	5/297	111/18870	0.0310566	0.133788	0.103307	ADAMTS6/EFNB2/FOXC2/NOG/WNT11	5
BP	GO:0070741	response to interleukin-6	3/297	44/18870	0.0318112	0.136331	0.105271	FOXA2/IL6/YAP1	3
BP	GO:2000242	negative regulation of reproductive process	4/297	76/18870	0.0318981	0.136331	0.105271	IL1A/LIF/NPR2/PAEP	4
BP	GO:0010002	cardioblast differentiation	2/297	18/18870	0.0319977	0.136331	0.105271	NRG1/TBX5	2
BP	GO:0016264	gap junction assembly	2/297	18/18870	0.0319977	0.136331	0.105271	CAV1/TBX5	2
BP	GO:0019896	axonal transport of mitochondrion	2/297	18/18870	0.0319977	0.136331	0.105271	FEZ1/NEFL	2
BP	GO:0032328	alanine transport	2/297	18/18870	0.0319977	0.136331	0.105271	SLC6A17/SLC7A8	2
BP	GO:0038083	peptidyl-tyrosine autophosphorylation	2/297	18/18870	0.0319977	0.136331	0.105271	CAV1/EGFR	2
BP	GO:0086103	G protein-coupled receptor signaling pathway involved in heart process	2/297	18/18870	0.0319977	0.136331	0.105271	CAV1/CHGA	2
BP	GO:1905209	positive regulation of cardiocyte differentiation	2/297	18/18870	0.0319977	0.136331	0.105271	EFNB2/TBX5	2
BP	GO:0002573	myeloid leukocyte differentiation	8/297	235/18870	0.0330289	0.140554	0.108531	CSF2/DHRS2/FSTL3/IL31RA/INHBA/LIF/LRRC17/TSPAN2	8
BP	GO:0032355	response to estradiol	5/297	113/18870	0.0331769	0.141012	0.108885	AREG/EGFR/MYOG/TH/WNT7A	5
BP	GO:0032091	negative regulation of protein binding	4/297	77/18870	0.033244	0.141126	0.108973	CAV1/DACT1/DKK1/NOG	4
BP	GO:1903531	negative regulation of secretion by cell	6/297	152/18870	0.0333678	0.14148	0.109246	ADRA2C/CHGA/IL11/IL13RA2/INHBA/LIF	6
BP	GO:0048701	embryonic cranial skeleton morphogenesis	3/297	45/18870	0.033698	0.142534	0.110061	FOXC2/LHX1/MMP16	3
BP	GO:0071604	transforming growth factor beta production	3/297	45/18870	0.033698	0.142534	0.110061	FN1/THBS1/WNT11	3
BP	GO:0018958	phenol-containing compound metabolic process	5/297	114/18870	0.0342701	0.144779	0.111794	DIO3/SLC16A2/SLC7A11/TH/TRPC1	5
BP	GO:0019233	sensory perception of pain	4/297	78/18870	0.0346227	0.146092	0.112808	ANO1/HOXB8/NTSR1/SCN9A	4
BP	GO:0008037	cell recognition	6/297	154/18870	0.0352291	0.147404	0.113821	DSCAM/FOLR3/GAP43/PAEP/PTX3/SPON2	6
BP	GO:0048259	regulation of receptor-mediated endocytosis	5/297	115/18870	0.0353853	0.147404	0.113821	APLN/DKK1/EFNB2/NECAB2/SERPINE1	5
BP	GO:0001502	cartilage condensation	2/297	19/18870	0.0353971	0.147404	0.113821	COL2A1/WNT7A	2
BP	GO:0001845	phagolysosome assembly	2/297	19/18870	0.0353971	0.147404	0.113821	SRPX/SYT7	2
BP	GO:0021513	spinal cord dorsal/ventral patterning	2/297	19/18870	0.0353971	0.147404	0.113821	GLI2/RFX8	2
BP	GO:0021692	cerebellar Purkinje cell layer morphogenesis	2/297	19/18870	0.0353971	0.147404	0.113821	LHX1/LHX5	2
BP	GO:0030540	female genitalia development	2/297	19/18870	0.0353971	0.147404	0.113821	LHX1/NPR2	2
BP	GO:0032305	positive regulation of icosanoid secretion	2/297	19/18870	0.0353971	0.147404	0.113821	IL1A/NTSR1	2
BP	GO:0048266	behavioral response to pain	2/297	19/18870	0.0353971	0.147404	0.113821	SCN9A/THBS1	2
BP	GO:0051797	regulation of hair follicle development	2/297	19/18870	0.0353971	0.147404	0.113821	FST/GAL	2
BP	GO:1903817	negative regulation of voltage-gated potassium channel activity	2/297	19/18870	0.0353971	0.147404	0.113821	CAV1/GRP	2
BP	GO:0032768	regulation of monooxygenase activity	3/297	46/18870	0.0356417	0.147894	0.114199	EGFR/GDNF/IL1A	3
BP	GO:0035272	exocrine system development	3/297	46/18870	0.0356417	0.147894	0.114199	EGFR/SEMA3C/SNAI2	3
BP	GO:0048483	autonomic nervous system development	3/297	46/18870	0.0356417	0.147894	0.114199	FN1/GDNF/SEMA3A	3
BP	GO:0022898	regulation of transmembrane transporter activity	8/297	239/18870	0.035942	0.148963	0.115025	CAV1/GAL/GRP/HECW1/JPH3/LRRC38/PDZK1/SCN4B	8
BP	GO:0031016	pancreas development	4/297	79/18870	0.0360342	0.149169	0.115184	CDH2/FOXA2/IL6/NKX6-1	4
BP	GO:0003407	neural retina development	4/297	80/18870	0.0374785	0.154363	0.119195	DIO3/DSCAM/LHX1/SIX3	4
BP	GO:0048844	artery morphogenesis	4/297	80/18870	0.0374785	0.154363	0.119195	EFNB2/FOXC2/NOG/WNT11	4
BP	GO:0097061	dendritic spine organization	4/297	80/18870	0.0374785	0.154363	0.119195	ITGA3/KIF1A/WNT7A/ZNF365	4
BP	GO:0045664	regulation of neuron differentiation	7/297	198/18870	0.0375936	0.154363	0.119195	ADRA2C/DKK1/GDF6/NAP1L2/NGF/NKX6-1/SIX3	7
BP	GO:0055010	ventricular cardiac muscle tissue morphogenesis	3/297	47/18870	0.0376421	0.154363	0.119195	FOXC2/NOG/NRG1	3
BP	GO:0061383	trabecula morphogenesis	3/297	47/18870	0.0376421	0.154363	0.119195	FBN2/NOG/NRG1	3
BP	GO:0099054	presynapse assembly	3/297	47/18870	0.0376421	0.154363	0.119195	DKK1/SLITRK6/WNT7A	3
BP	GO:0140353	lipid export from cell	3/297	47/18870	0.0376421	0.154363	0.119195	GAL/IL1A/INHBA	3
BP	GO:0002029	desensitization of G protein-coupled receptor signaling pathway	2/297	20/18870	0.0389293	0.157534	0.121643	APLN/NECAB2	2
BP	GO:0003417	growth plate cartilage development	2/297	20/18870	0.0389293	0.157534	0.121643	MMP13/NPR2	2
BP	GO:0006309	apoptotic DNA fragmentation	2/297	20/18870	0.0389293	0.157534	0.121643	FOXL2/IL6	2
BP	GO:0006700	C21-steroid hormone biosynthetic process	2/297	20/18870	0.0389293	0.157534	0.121643	DKK3/LHB	2
BP	GO:0015812	gamma-aminobutyric acid transport	2/297	20/18870	0.0389293	0.157534	0.121643	NTSR1/SLC6A11	2
BP	GO:0032098	regulation of appetite	2/297	20/18870	0.0389293	0.157534	0.121643	SCT/SLC22A3	2
BP	GO:0032303	regulation of icosanoid secretion	2/297	20/18870	0.0389293	0.157534	0.121643	IL1A/NTSR1	2
BP	GO:0033141	positive regulation of peptidyl-serine phosphorylation of STAT protein	2/297	20/18870	0.0389293	0.157534	0.121643	IFNK/LIF	2
BP	GO:0043011	myeloid dendritic cell differentiation	2/297	20/18870	0.0389293	0.157534	0.121643	CSF2/DHRS2	2
BP	GO:0055093	response to hyperoxia	2/297	20/18870	0.0389293	0.157534	0.121643	CAV1/PDPN	2
BP	GO:0003151	outflow tract morphogenesis	4/297	81/18870	0.0389557	0.157534	0.121643	FOXC2/NOG/SEMA3C/WNT11	4
BP	GO:0050810	regulation of steroid biosynthetic process	4/297	81/18870	0.0389557	0.157534	0.121643	DKK3/FGF19/IL1A/SNAI2	4
BP	GO:0034767	positive regulation of monoatomic ion transmembrane transport	6/297	158/18870	0.0391494	0.158135	0.122107	CAV1/GAL/LRRC38/NTSR1/PDZK1/TRPC1	6
BP	GO:0006953	acute-phase response	3/297	48/18870	0.0396987	0.15925	0.122968	FN1/IL1A/IL6	3
BP	GO:0008542	visual learning	3/297	48/18870	0.0396987	0.15925	0.122968	LRRN4/NOG/SLC7A11	3
BP	GO:0044331	cell-cell adhesion mediated by cadherin	3/297	48/18870	0.0396987	0.15925	0.122968	CDH13/CDH2/FOXA2	3
BP	GO:0045776	negative regulation of blood pressure	3/297	48/18870	0.0396987	0.15925	0.122968	APLN/NTSR1/VEGFC	3
BP	GO:0046189	phenol-containing compound biosynthetic process	3/297	48/18870	0.0396987	0.15925	0.122968	SLC7A11/TH/TRPC1	3
BP	GO:2001222	regulation of neuron migration	3/297	48/18870	0.0396987	0.15925	0.122968	FLRT2/NKX6-1/SEMA3A	3
BP	GO:0043434	response to peptide hormone	12/297	430/18870	0.0403602	0.161718	0.124874	AREG/BCAR3/CAV1/FOXC2/GAL/INHBA/NEFL/NKX6-1/NPR2/STC2/TH/VGF	12
BP	GO:0030100	regulation of endocytosis	9/297	291/18870	0.0414701	0.165975	0.128161	APLN/CAV1/CDH13/DKK1/EFNB2/NECAB2/PTX3/SERPINE1/SYT7	9
BP	GO:0007520	myoblast fusion	3/297	49/18870	0.0418112	0.166578	0.128627	ADAMTS15/MYMK/MYOG	3
BP	GO:0010171	body morphogenesis	3/297	49/18870	0.0418112	0.166578	0.128627	DKK1/MYH3/NOG	3
BP	GO:0010543	regulation of platelet activation	3/297	49/18870	0.0418112	0.166578	0.128627	IL6/PDPN/SERPINE2	3
BP	GO:0042461	photoreceptor cell development	3/297	49/18870	0.0418112	0.166578	0.128627	CNGB1/DIO3/TH	3
BP	GO:0042310	vasoconstriction	4/297	83/18870	0.0420088	0.167175	0.129087	ADRA2C/CAV1/HTR1D/HTR7	4
BP	GO:0030510	regulation of BMP signaling pathway	5/297	121/18870	0.0425455	0.167202	0.129108	DKK1/FST/FSTL3/ITGA3/NOG	5
BP	GO:0051100	negative regulation of binding	5/297	121/18870	0.0425455	0.167202	0.129108	CAV1/DACT1/DKK1/HMGA2/NOG	5
BP	GO:0001780	neutrophil homeostasis	2/297	21/18870	0.0425891	0.167202	0.129108	IL6/SLC7A11	2
BP	GO:0021511	spinal cord patterning	2/297	21/18870	0.0425891	0.167202	0.129108	GLI2/RFX8	2
BP	GO:0022401	negative adaptation of signaling pathway	2/297	21/18870	0.0425891	0.167202	0.129108	APLN/NECAB2	2
BP	GO:0042745	circadian sleep/wake cycle	2/297	21/18870	0.0425891	0.167202	0.129108	CSF2/TH	2
BP	GO:0060445	branching involved in salivary gland morphogenesis	2/297	21/18870	0.0425891	0.167202	0.129108	SEMA3C/SNAI2	2
BP	GO:0061318	renal filtration cell differentiation	2/297	21/18870	0.0425891	0.167202	0.129108	BASP1/FOXC2	2
BP	GO:0071498	cellular response to fluid shear stress	2/297	21/18870	0.0425891	0.167202	0.129108	HAS2/TFPI2	2
BP	GO:0072112	podocyte differentiation	2/297	21/18870	0.0425891	0.167202	0.129108	BASP1/FOXC2	2
BP	GO:1901018	positive regulation of potassium ion transmembrane transporter activity	2/297	21/18870	0.0425891	0.167202	0.129108	GAL/LRRC38	2
BP	GO:1903429	regulation of cell maturation	2/297	21/18870	0.0425891	0.167202	0.129108	NPR2/PAEP	2
BP	GO:0060395	SMAD protein signal transduction	4/297	84/18870	0.0435846	0.170918	0.131978	GDF6/INHBA/PMEPA1/VEPH1	4
BP	GO:0032874	positive regulation of stress-activated MAPK cascade	5/297	122/18870	0.0438177	0.171504	0.13243	FGF19/GDF6/IL1A/SEMA3A/WNT7A	5
BP	GO:0021515	cell differentiation in spinal cord	3/297	50/18870	0.0439792	0.171504	0.13243	GLI2/LHX1/LHX5	3
BP	GO:0060976	coronary vasculature development	3/297	50/18870	0.0439792	0.171504	0.13243	ADAMTS6/APLN/TBX5	3
BP	GO:1902041	regulation of extrinsic apoptotic signaling pathway via death domain receptors	3/297	50/18870	0.0439792	0.171504	0.13243	SERPINE1/THBS1/TIMP3	3
BP	GO:2000649	regulation of sodium ion transmembrane transporter activity	3/297	50/18870	0.0439792	0.171504	0.13243	GRP/HECW1/SCN4B	3
BP	GO:0007254	JNK cascade	6/297	163/18870	0.0444259	0.172861	0.133478	DACT1/EGFR/FGF19/IL1A/SEMA3A/WNT7A	6
BP	GO:0030307	positive regulation of cell growth	6/297	163/18870	0.0444259	0.172861	0.133478	DSCAM/EGFR/FN1/L1CAM/NGF/YAP1	6
BP	GO:0018105	peptidyl-serine phosphorylation	9/297	295/18870	0.0445491	0.173147	0.133699	BCAR3/CAV1/DKK1/EGFR/IFNK/IL11/IL6/LIF/NGF	9
BP	GO:0034284	response to monosaccharide	7/297	206/18870	0.0449209	0.174399	0.134666	ANO1/FOXA2/IL1A/NKX6-1/PTPRN/TH/THBS1	7
BP	GO:0030282	bone mineralization	5/297	123/18870	0.0451124	0.174754	0.13494	FBN2/IBSP/MMP13/PTHLH/WNT11	5
BP	GO:2001257	regulation of cation channel activity	5/297	123/18870	0.0451124	0.174754	0.13494	CAV1/GAL/GRP/JPH3/LRRC38	5
BP	GO:0008306	associative learning	4/297	85/18870	0.0451934	0.174874	0.135033	LRRN4/NOG/SHANK2/SLC7A11	4
BP	GO:0008089	anterograde axonal transport	3/297	51/18870	0.0462022	0.176698	0.136441	FEZ1/KIF1A/NEFL	3
BP	GO:0035094	response to nicotine	3/297	51/18870	0.0462022	0.176698	0.136441	NKX6-1/SLC7A11/TH	3
BP	GO:0003228	atrial cardiac muscle tissue development	2/297	22/18870	0.0463718	0.176698	0.136441	NOG/TBX5	2
BP	GO:0006837	serotonin transport	2/297	22/18870	0.0463718	0.176698	0.136441	SLC22A1/SLC22A3	2
BP	GO:0007398	ectoderm development	2/297	22/18870	0.0463718	0.176698	0.136441	ITGA6/LHX1	2
BP	GO:0008090	retrograde axonal transport	2/297	22/18870	0.0463718	0.176698	0.136441	KIF1A/NEFL	2
BP	GO:0021756	striatum development	2/297	22/18870	0.0463718	0.176698	0.136441	INHBA/SLC7A11	2
BP	GO:0033630	positive regulation of cell adhesion mediated by integrin	2/297	22/18870	0.0463718	0.176698	0.136441	FOXC2/LIF	2
BP	GO:0035313	wound healing, spreading of epidermal cells	2/297	22/18870	0.0463718	0.176698	0.136441	ITGA5/WNT7A	2
BP	GO:0048485	sympathetic nervous system development	2/297	22/18870	0.0463718	0.176698	0.136441	GDNF/SEMA3A	2
BP	GO:0060546	negative regulation of necroptotic process	2/297	22/18870	0.0463718	0.176698	0.136441	BIRC2/CAV1	2
BP	GO:0072311	glomerular epithelial cell differentiation	2/297	22/18870	0.0463718	0.176698	0.136441	BASP1/FOXC2	2
BP	GO:0086012	membrane depolarization during cardiac muscle cell action potential	2/297	22/18870	0.0463718	0.176698	0.136441	SCN4B/SCN5A	2
BP	GO:2000725	regulation of cardiac muscle cell differentiation	2/297	22/18870	0.0463718	0.176698	0.136441	DKK1/EFNB2	2
BP	GO:0070304	positive regulation of stress-activated protein kinase signaling cascade	5/297	124/18870	0.0464299	0.176726	0.136463	FGF19/GDF6/IL1A/SEMA3A/WNT7A	5
BP	GO:0050796	regulation of insulin secretion	6/297	165/18870	0.046655	0.177391	0.136976	ANO1/CHGA/FOXA2/IL6/NKX6-1/SYT7	6
BP	GO:0008625	extrinsic apoptotic signaling pathway via death domain receptors	4/297	86/18870	0.046835	0.177496	0.137057	NGF/SERPINE1/THBS1/TIMP3	4
BP	GO:0032370	positive regulation of lipid transport	4/297	86/18870	0.046835	0.177496	0.137057	CAV1/GAL/IL1A/NTSR1	4
BP	GO:1901379	regulation of potassium ion transmembrane transport	4/297	86/18870	0.046835	0.177496	0.137057	CAV1/GAL/GRP/LRRC38	4
BP	GO:0001952	regulation of cell-matrix adhesion	5/297	125/18870	0.04777	0.180548	0.139414	AJAP1/CDH13/PLAU/SERPINE1/THBS1	5
BP	GO:0072089	stem cell proliferation	5/297	125/18870	0.04777	0.180548	0.139414	HMGA2/SNAI2/VEGFC/WNT11/YAP1	5
BP	GO:0007338	single fertilization	6/297	166/18870	0.0477952	0.180548	0.139414	FOLR3/FOXL2/HOXA11/NPR2/PAEP/SERPINA5	6
BP	GO:0031103	axon regeneration	3/297	52/18870	0.0484799	0.182347	0.140803	GAP43/NEFL/TNC	3
BP	GO:0051180	vitamin transport	3/297	52/18870	0.0484799	0.182347	0.140803	FOLR3/SLC22A1/SLC35F3	3
BP	GO:0060324	face development	3/297	52/18870	0.0484799	0.182347	0.140803	DKK1/MYH3/NOG	3
BP	GO:0099172	presynapse organization	3/297	52/18870	0.0484799	0.182347	0.140803	DKK1/SLITRK6/WNT7A	3
BP	GO:0030509	BMP signaling pathway	6/297	167/18870	0.0489525	0.183927	0.142023	DKK1/FST/FSTL3/GDF6/ITGA3/NOG	6
BP	GO:0051701	biological process involved in interaction with host	7/297	211/18870	0.0499365	0.185079	0.142912	CAV1/CLDN6/EFNB2/EGFR/ITGA5/NCAM1/PTX3	7
CC	GO:0062023	collagen-containing extracellular matrix	33/313	429/19886	5.61851e-14	1.71926e-11	1.46081e-11	ADAMTS15/CDH13/CDH2/COL10A1/COL17A1/COL28A1/COL2A1/COL4A6/COL5A3/CSPG4/F3/FBN2/FN1/FREM2/INHBE/L1CAM/LAMA3/LAMB3/LAMC2/LOXL2/MATN3/MFAP5/NCAM1/P3H2/SERPINA5/SERPINE1/SERPINE2/SMOC1/SRPX/TGFBI/THBS1/TIMP3/TNC	33
CC	GO:0005788	endoplasmic reticulum lumen	26/313	313/19886	5.32857e-12	8.15271e-10	6.92714e-10	ARSI/BCHE/CDH2/CHGB/COL10A1/COL17A1/COL28A1/COL2A1/COL4A6/COL5A3/EVA1A/FN1/FSTL3/IL6/MATN3/P3H2/P4HA3/PDGFC/PROC/PRSS23/SCG2/STC2/THBS1/TNC/VGF/WNT7A	26
CC	GO:0005604	basement membrane	15/313	90/19886	1.02111e-11	1.04153e-09	8.84961e-10	COL17A1/COL28A1/COL2A1/COL4A6/FN1/FREM2/LAMA3/LAMB3/LAMC2/LOXL2/P3H2/SMOC1/TGFBI/TIMP3/TNC	15
CC	GO:0098644	complex of collagen trimers	5/313	21/19886	1.54789e-05	0.0010994	0.00093413	COL10A1/COL28A1/COL2A1/COL4A6/COL5A3	5
CC	GO:0030055	cell-substrate junction	20/313	431/19886	1.7964e-05	0.0010994	0.00093413	ACTN1/BCAR3/CAV1/CDH13/CDH2/COL17A1/CORO2B/CSPG4/EFNB2/EGFR/FAP/FLRT2/ITGA3/ITGA5/ITGA6/L1CAM/LAMA3/PLAU/SCARF2/TNC	20
CC	GO:0150034	distal axon	15/313	276/19886	3.44359e-05	0.00175623	0.00149222	BASP1/CNGB1/DSCAM/FEZ1/GAP43/IGF2BP1/ITGA3/L1CAM/NEFL/NTSR1/PCDHGB1/PTPRN/SHANK2/TENM2/TH	15
CC	GO:0005581	collagen trimer	8/313	86/19886	6.30236e-05	0.00275503	0.00234088	C1QL4/CCBE1/COL10A1/COL17A1/COL28A1/COL2A1/COL4A6/COL5A3	8
CC	GO:0030426	growth cone	11/313	168/19886	7.43706e-05	0.00284467	0.00241704	BASP1/DSCAM/FEZ1/GAP43/IGF2BP1/ITGA3/L1CAM/NEFL/PCDHGB1/SHANK2/TENM2	11
CC	GO:0030427	site of polarized growth	11/313	173/19886	9.67561e-05	0.00328971	0.00279518	BASP1/DSCAM/FEZ1/GAP43/IGF2BP1/ITGA3/L1CAM/NEFL/PCDHGB1/SHANK2/TENM2	11
CC	GO:0005925	focal adhesion	18/313	421/19886	0.000133313	0.00407937	0.00346613	ACTN1/BCAR3/CAV1/CDH13/CDH2/CORO2B/CSPG4/EFNB2/EGFR/FAP/FLRT2/ITGA3/ITGA5/ITGA6/L1CAM/PLAU/SCARF2/TNC	18
CC	GO:0045177	apical part of cell	19/313	469/19886	0.00017481	0.0048629	0.00413187	AJAP1/ANO1/ANXA13/AQP10/CDH2/CSPG4/FAP/FN1/KISS1/MYO7B/PDPN/PDZK1/SHANK2/SLC16A2/SLC22A1/SLC22A3/SLC5A12/SLC7A11/SLC7A8	19
CC	GO:0031045	dense core granule	5/313	37/19886	0.000269787	0.00687956	0.00584538	CHGA/GRP/KIF1A/SCG2/SYT7	5
CC	GO:1904090	peptidase inhibitor complex	3/313	11/19886	0.000580241	0.0119658	0.0101671	PLAU/SERPINA5/SERPINE1	3
CC	GO:0031091	platelet alpha granule	7/313	91/19886	0.000585393	0.0119658	0.0101671	ACTN1/FN1/SERPINA5/SERPINE1/SERPINE2/THBS1/VEGFC	7
CC	GO:0098992	neuronal dense core vesicle	4/313	25/19886	0.000586561	0.0119658	0.0101671	CHGA/GRP/KIF1A/SCG2	4
CC	GO:0016324	apical plasma membrane	16/313	403/19886	0.000698351	0.0129993	0.0110451	AJAP1/ANO1/ANXA13/AQP10/CDH2/CSPG4/FN1/KISS1/PDPN/PDZK1/SHANK2/SLC16A2/SLC22A1/SLC22A3/SLC5A12/SLC7A8	16
CC	GO:0005583	fibrillar collagen trimer	3/313	12/19886	0.000764663	0.0129993	0.0110451	COL28A1/COL2A1/COL5A3	3
CC	GO:0098643	banded collagen fibril	3/313	12/19886	0.000764663	0.0129993	0.0110451	COL28A1/COL2A1/COL5A3	3
CC	GO:0098858	actin-based cell projection	11/313	227/19886	0.000984563	0.0158567	0.013473	ACTG2/GAP43/IGF2BP1/ITGA3/ITGA6/MYO7B/PDPN/PDZK1/SLC7A11/SLC7A8/TENM2	11
CC	GO:0001518	voltage-gated sodium channel complex	3/313	14/19886	0.00123596	0.0189103	0.0160675	SCN4B/SCN5A/SCN9A	3
CC	GO:0030175	filopodium	7/313	108/19886	0.00160828	0.0234349	0.019912	ACTG2/GAP43/IGF2BP1/ITGA3/ITGA6/PDPN/TENM2	7
CC	GO:0031528	microvillus membrane	4/313	33/19886	0.0017188	0.023907	0.0203131	PDPN/PDZK1/SLC7A11/SLC7A8	4
CC	GO:0098636	protein complex involved in cell adhesion	5/313	57/19886	0.00200608	0.0266896	0.0226775	ITGA3/ITGA5/ITGA6/PLAU/TNC	5
CC	GO:0031527	filopodium membrane	3/313	18/19886	0.00264458	0.0337184	0.0286496	GAP43/ITGA3/PDPN	3
CC	GO:0031253	cell projection membrane	13/313	352/19886	0.00401579	0.0479492	0.0407411	CNGB1/CSPG4/EGFR/FAP/GAP43/ITGA3/ITGA5/PDPN/PDZK1/SGCE/SHANK2/SLC7A11/SLC7A8	13
CC	GO:0031093	platelet alpha granule lumen	5/313	67/19886	0.00407411	0.0479492	0.0407411	ACTN1/FN1/SERPINE1/THBS1/VEGFC	5
CC	GO:0031258	lamellipodium membrane	3/313	22/19886	0.00476447	0.0539973	0.0458801	CSPG4/FAP/PDPN	3
CC	GO:0044291	cell-cell contact zone	5/313	72/19886	0.00553956	0.0605394	0.0514387	ACTN1/AJAP1/CDH2/SCN4B/SCN5A	5
CC	GO:0034706	sodium channel complex	3/313	24/19886	0.00611845	0.0622695	0.0529087	SCN4B/SCN5A/SCN9A	3
CC	GO:0016323	basolateral plasma membrane	10/313	249/19886	0.00628714	0.0622695	0.0529087	AJAP1/AQP10/CDH2/EGFR/ITGA3/PDPN/SLC22A1/SLC22A3/SLC7A8/SLCO1B3	10
CC	GO:0097546	ciliary base	4/313	47/19886	0.00630835	0.0622695	0.0529087	CEP126/GLI1/GLI2/KCNF1	4
CC	GO:0005796	Golgi lumen	6/313	106/19886	0.00664019	0.0634969	0.0539516	CSPG4/LHB/MMP16/NGF/PROC/WNT7A	6
CC	GO:0014704	intercalated disc	4/313	50/19886	0.00785184	0.072808	0.061863	ACTN1/CDH2/SCN4B/SCN5A	4
CC	GO:0045178	basal part of cell	11/313	301/19886	0.00844622	0.0736504	0.0625787	AJAP1/AQP10/CDH2/EGFR/FAP/ITGA3/PDPN/SLC22A1/SLC22A3/SLC7A8/SLCO1B3	11
CC	GO:0044853	plasma membrane raft	6/313	112/19886	0.00861654	0.0736504	0.0625787	ADD2/CAV1/CDH13/CDH2/HAS2/SCN5A	6
CC	GO:0009897	external side of plasma membrane	13/313	387/19886	0.00866475	0.0736504	0.0625787	CDH13/F3/FOLR3/IL13RA2/IL31RA/ITGA3/ITGA5/ITGA6/NCAM1/NT5E/PLAU/SERPINA5/THBS1	13
CC	GO:0099571	postsynaptic cytoskeleton	2/313	10/19886	0.0102232	0.0845483	0.0718384	NEFL/NEFM	2
CC	GO:0043025	neuronal cell body	15/313	489/19886	0.0110394	0.0888963	0.0755328	DNER/DSCAM/FEZ1/GAL/GAP43/IGF2BP1/KISS1/L1CAM/NTSR1/PTPRN/SHANK2/SLC22A3/SLC6A2/TH/VGF	15
CC	GO:0008305	integrin complex	3/313	31/19886	0.0125335	0.0983395	0.0835564	ITGA3/ITGA5/ITGA6	3
CC	GO:0009925	basal plasma membrane	10/313	282/19886	0.0142585	0.109077	0.0926801	AJAP1/AQP10/CDH2/EGFR/ITGA3/PDPN/SLC22A1/SLC22A3/SLC7A8/SLCO1B3	10
CC	GO:0001527	microfibril	2/313	13/19886	0.0171779	0.125153	0.106339	FBN2/MFAP5	2
CC	GO:1905286	serine-type peptidase complex	2/313	13/19886	0.0171779	0.125153	0.106339	F3/PLAU	2
CC	GO:0005902	microvillus	5/313	97/19886	0.0186177	0.132489	0.112572	MYO7B/PDPN/PDZK1/SLC7A11/SLC7A8	5
CC	GO:0034702	monoatomic ion channel complex	10/313	300/19886	0.020967	0.145816	0.123896	ANO1/CHRNA9/CNGB1/GRIA3/KCNF1/LRRC38/SCN4B/SCN5A/SCN9A/TRPC1	10
CC	GO:0097060	synaptic membrane	12/313	393/19886	0.0224071	0.152368	0.129463	CHRNA9/CHRNG/EFNB2/GRIA3/IL31RA/ITGA3/ITGA5/SHANK2/SLC6A11/SLC6A2/SYT7/TENM2	12
CC	GO:0005903	brush border	5/313	108/19886	0.0280635	0.184575	0.156829	ACTN1/MYO7B/PDZK1/SHANK2/SLC7A11	5
CC	GO:0098637	protein complex involved in cell-matrix adhesion	2/313	17/19886	0.028741	0.184575	0.156829	PLAU/TNC	2
CC	GO:0098984	neuron to neuron synapse	11/313	362/19886	0.028953	0.184575	0.156829	ADD2/CAMK2N1/CDH2/EFNB2/GAP43/GRIA3/NTSR1/SH2D5/SHANK2/SPOCK1/SYT7	11
CC	GO:0005912	adherens junction	7/313	188/19886	0.0296449	0.185129	0.157299	AJAP1/CDH13/CDH2/EFNB2/FRMD5/ITGA6/LAMA3	7
CC	GO:0045211	postsynaptic membrane	9/313	275/19886	0.0306588	0.187632	0.159426	CHRNA9/CHRNG/EFNB2/GRIA3/ITGA3/ITGA5/SHANK2/SLC6A11/TENM2	9
CC	GO:0031594	neuromuscular junction	4/313	76/19886	0.0319167	0.1915	0.162713	ITGA3/NEFL/SERPINE2/SPOCK1	4
CC	GO:0034703	cation channel complex	7/313	193/19886	0.0334842	0.194628	0.16537	CNGB1/KCNF1/LRRC38/SCN4B/SCN5A/SCN9A/TRPC1	7
CC	GO:0043195	terminal bouton	3/313	45/19886	0.03371	0.194628	0.16537	CNGB1/NTSR1/TH	3
CC	GO:0031983	vesicle lumen	10/313	326/19886	0.0343578	0.194694	0.165427	ACTN1/EGFR/FN1/FOLR3/GRP/PTX3/SERPINE1/THBS1/TIMP3/VEGFC	10
CC	GO:0098982	GABA-ergic synapse	4/313	79/19886	0.0360546	0.200594	0.17044	CDH13/GAP43/SLC6A11/SLC6A17	4
CC	GO:0045121	membrane raft	9/313	286/19886	0.0378962	0.207075	0.175946	ADD2/CAV1/CDH13/CDH2/EGFR/HAS2/NTSR1/PDPN/SCN5A	9
CC	GO:0098857	membrane microdomain	9/313	287/19886	0.0386072	0.20726	0.176103	ADD2/CAV1/CDH13/CDH2/EGFR/HAS2/NTSR1/PDPN/SCN5A	9
CC	GO:0030027	lamellipodium	7/313	201/19886	0.0402921	0.212576	0.18062	ACTG2/CDH2/CSPG4/FAP/GDPD2/IGF2BP1/PDPN	7
CC	GO:0016327	apicolateral plasma membrane	2/313	22/19886	0.046379	0.240542	0.204382	CDH2/CLDN6	2
MF	GO:0005201	extracellular matrix structural constituent	18/301	166/18496	2.43082e-10	1.14249e-07	9.31388e-08	COL10A1/COL17A1/COL28A1/COL2A1/COL4A6/COL5A3/FBN2/FN1/LAMA3/LAMB3/LAMC2/MATN3/MFAP5/SRPX/TFPI2/TGFBI/THBS1/TNC	18
MF	GO:0008083	growth factor activity	17/301	162/18496	1.2905e-09	3.03267e-07	2.47232e-07	AREG/CSF2/DKK1/FGF19/FGF5/GDF6/GDNF/IL11/IL6/INHBA/INHBE/LIF/NGF/NRG1/PDGFC/VEGFC/VGF	17
MF	GO:0005179	hormone activity	13/301	126/18496	1.43008e-07	2.24047e-05	1.82649e-05	APLN/CHGB/FBN2/GAL/GAST/GRP/INHBA/INHBE/LHB/PTHLH/SCT/STC2/VGF	13
MF	GO:0061134	peptidase regulator activity	17/301	228/18496	2.12337e-07	2.49496e-05	2.03396e-05	CAV1/COL28A1/CST4/CTSV/FN1/NGF/PCSK1N/SERPINA5/SERPINE1/SERPINE2/SLCO1B3/SPOCK1/SPOCK3/TFPI2/THBS1/TIMP3/TIMP4	17
MF	GO:0004866	endopeptidase inhibitor activity	14/301	168/18496	6.71397e-07	6.31113e-05	5.14502e-05	COL28A1/CST4/NGF/PCSK1N/SERPINA5/SERPINE1/SERPINE2/SLCO1B3/SPOCK1/SPOCK3/TFPI2/THBS1/TIMP3/TIMP4	14
MF	GO:0030414	peptidase inhibitor activity	14/301	175/18496	1.09879e-06	8.60715e-05	7.0168e-05	COL28A1/CST4/NGF/PCSK1N/SERPINA5/SERPINE1/SERPINE2/SLCO1B3/SPOCK1/SPOCK3/TFPI2/THBS1/TIMP3/TIMP4	14
MF	GO:0061135	endopeptidase regulator activity	14/301	184/18496	1.99824e-06	0.000134167	0.000109377	COL28A1/CST4/NGF/PCSK1N/SERPINA5/SERPINE1/SERPINE2/SLCO1B3/SPOCK1/SPOCK3/TFPI2/THBS1/TIMP3/TIMP4	14
MF	GO:0070851	growth factor receptor binding	12/301	138/18496	2.71748e-06	0.000159652	0.000130153	AREG/CSF2/FGF19/FGF5/FLRT2/GDNF/IL11/IL1A/IL6/ITGA5/PDGFC/VEGFC	12
MF	GO:0008191	metalloendopeptidase inhibitor activity	5/301	16/18496	4.16308e-06	0.000217405	0.000177235	NGF/SPOCK1/SPOCK3/TIMP3/TIMP4	5
MF	GO:0005125	cytokine activity	15/301	237/18496	8.3643e-06	0.000393122	0.000320485	AREG/CSF2/GDF6/IFNK/IL11/IL1A/IL24/IL6/INHBA/INHBE/LIF/NRG1/SCG2/WNT11/WNT7A	15
MF	GO:0043394	proteoglycan binding	6/301	36/18496	2.28192e-05	0.000975003	0.000794852	COL2A1/COL5A3/FN1/FST/THBS1/TNC	6
MF	GO:0005178	integrin binding	11/301	154/18496	4.515e-05	0.00176838	0.00144163	ACTN1/FAP/FN1/FRMD5/IBSP/ITGA3/ITGA5/ITGA6/NRG1/TGFBI/THBS1	11
MF	GO:0030020	extracellular matrix structural constituent conferring tensile strength	6/301	45/18496	8.43922e-05	0.0030511	0.00248735	COL10A1/COL17A1/COL28A1/COL2A1/COL4A6/COL5A3	6
MF	GO:0002020	protease binding	10/301	142/18496	0.000112441	0.00366306	0.00298623	CCBE1/F3/FAP/FN1/ITGA3/SERPINA5/SERPINE1/THBS1/TIMP3/TIMP4	10
MF	GO:0005518	collagen binding	7/301	68/18496	0.000116906	0.00366306	0.00298623	CCBE1/COL5A3/FN1/ITGA3/MMP13/TGFBI/THBS1	7
MF	GO:0008201	heparin binding	11/301	174/18496	0.000135567	0.00398229	0.00324648	ADAMTS15/COL17A1/COL28A1/COL5A3/FN1/LAMC2/RSPO4/SERPINA5/SERPINE2/SMOC1/THBS1	11
MF	GO:0005539	glycosaminoglycan binding	13/301	240/18496	0.0001626	0.0044954	0.00366478	ADAMTS15/COL17A1/COL28A1/COL5A3/FN1/LAMC2/RSPO4/SERPINA5/SERPINE2/SMOC1/SPOCK3/SULF2/THBS1	13
MF	GO:0004857	enzyme inhibitor activity	17/301	386/18496	0.000210558	0.00527674	0.00430176	CAMK2N1/COL28A1/CST4/ELFN2/NGF/PCSK1N/SCG5/SERPINA5/SERPINE1/SERPINE2/SLCO1B3/SPOCK1/SPOCK3/TFPI2/THBS1/TIMP3/TIMP4	17
MF	GO:1901618	organic hydroxy compound transmembrane transporter activity	6/301	53/18496	0.000213315	0.00527674	0.00430176	ABCA4/AQP10/SLC22A1/SLC5A12/SLC6A2/SLCO1B3	6
MF	GO:0004867	serine-type endopeptidase inhibitor activity	8/301	101/18496	0.000244456	0.00574471	0.00468325	COL28A1/PCSK1N/SERPINA5/SERPINE1/SERPINE2/SLCO1B3/SPOCK1/TFPI2	8
MF	GO:0050840	extracellular matrix binding	6/301	55/18496	0.000262138	0.0058669	0.00478287	ADAMTS15/ITGA3/ITGA6/SMOC1/TGFBI/THBS1	6
MF	GO:0005326	neurotransmitter transmembrane transporter activity	4/301	21/18496	0.000330659	0.00706408	0.00575884	SLC22A1/SLC22A3/SLC6A15/SLC6A2	4
MF	GO:0004252	serine-type endopeptidase activity	10/301	174/18496	0.000578639	0.0117799	0.00960333	CTSV/F3/FAP/MMP1/MMP10/MMP13/PLAU/PROC/PRSS23/TLL1	10
MF	GO:1901681	sulfur compound binding	13/301	275/18496	0.000601527	0.0117799	0.00960333	ADAMTS15/COL17A1/COL28A1/COL5A3/FN1/FST/LAMC2/RSPO4/SERPINA5/SERPINE2/SMOC1/TH/THBS1	13
MF	GO:0008504	monoamine transmembrane transporter activity	3/301	12/18496	0.000841862	0.015827	0.0129026	SLC22A1/SLC22A3/SLC6A2	3
MF	GO:0045499	chemorepellent activity	4/301	28/18496	0.00103426	0.0186963	0.0152418	FLRT2/NRG1/SEMA3A/SEMA3C	4
MF	GO:0015081	sodium ion transmembrane transporter activity	9/301	157/18496	0.00109975	0.0191438	0.0156066	SCN4B/SCN5A/SCN9A/SLC13A5/SLC22A1/SLC5A12/SLC6A11/SLC6A15/SLC6A2	9
MF	GO:0008236	serine-type peptidase activity	10/301	192/18496	0.00123053	0.0206553	0.0168388	CTSV/F3/FAP/MMP1/MMP10/MMP13/PLAU/PROC/PRSS23/TLL1	10
MF	GO:0017171	serine hydrolase activity	10/301	196/18496	0.00143619	0.0232762	0.0189755	CTSV/F3/FAP/MMP1/MMP10/MMP13/PLAU/PROC/PRSS23/TLL1	10
MF	GO:0015370	solute:sodium symporter activity	6/301	80/18496	0.0019368	0.0303433	0.0247367	SLC13A5/SLC22A1/SLC5A12/SLC6A11/SLC6A15/SLC6A2	6
MF	GO:0015378	sodium:chloride symporter activity	3/301	16/18496	0.00204201	0.0309596	0.0252391	SLC22A1/SLC6A11/SLC6A2	3
MF	GO:0004222	metalloendopeptidase activity	7/301	110/18496	0.00215135	0.031598	0.0257596	ADAMTS15/ADAMTS6/MMP1/MMP10/MMP13/MMP16/TLL1	7
MF	GO:0072341	modified amino acid binding	6/301	84/18496	0.00248233	0.0353544	0.0288219	ANXA13/FOLR3/GAP43/SYT13/SYT7/THBS1	6
MF	GO:0015101	organic cation transmembrane transporter activity	4/301	36/18496	0.00268705	0.0371445	0.0302813	SLC22A1/SLC22A3/SLC6A2/SLC7A8	4
MF	GO:0015373	monoatomic anion:sodium symporter activity	3/301	18/18496	0.00290477	0.0377866	0.0308047	SLC22A1/SLC6A11/SLC6A2	3
MF	GO:0030297	transmembrane receptor protein tyrosine kinase activator activity	3/301	18/18496	0.00290477	0.0377866	0.0308047	AREG/EGFR/NRG1	3
MF	GO:0005343	organic acid:sodium symporter activity	4/301	37/18496	0.00297469	0.0377866	0.0308047	SLC13A5/SLC5A12/SLC6A11/SLC6A15	4
MF	GO:0001786	phosphatidylserine binding	5/301	62/18496	0.00335034	0.0414385	0.0337819	ANXA13/GAP43/SYT13/SYT7/THBS1	5
MF	GO:0099186	structural constituent of postsynapse	3/301	21/18496	0.00456702	0.0550385	0.044869	ACTN1/NEFL/SHANK2	3
MF	GO:0005248	voltage-gated sodium channel activity	3/301	22/18496	0.00522513	0.0598978	0.0488305	SCN4B/SCN5A/SCN9A	3
MF	GO:0015377	chloride:monoatomic cation symporter activity	3/301	22/18496	0.00522513	0.0598978	0.0488305	SLC22A1/SLC6A11/SLC6A2	3
MF	GO:0046943	carboxylic acid transmembrane transporter activity	8/301	164/18496	0.00549835	0.0615291	0.0501604	SLC13A5/SLC16A2/SLC5A12/SLC6A11/SLC6A15/SLC7A11/SLC7A8/SLCO1B3	8
MF	GO:0005342	organic acid transmembrane transporter activity	8/301	165/18496	0.00569928	0.0622944	0.0507842	SLC13A5/SLC16A2/SLC5A12/SLC6A11/SLC6A15/SLC7A11/SLC7A8/SLCO1B3	8
MF	GO:0008514	organic anion transmembrane transporter activity	10/301	242/18496	0.00646793	0.0690892	0.0563236	SLC13A5/SLC16A2/SLC22A1/SLC22A3/SLC5A12/SLC6A11/SLC6A15/SLC7A11/SLC7A8/SLCO1B3	10
MF	GO:0015291	secondary active transmembrane transporter activity	11/301	286/18496	0.00740934	0.0752862	0.0613756	SLC13A5/SLC16A2/SLC22A1/SLC5A12/SLC6A11/SLC6A15/SLC6A17/SLC6A2/SLC7A11/SLC7A8/SLCO1B3	11
MF	GO:0005104	fibroblast growth factor receptor binding	3/301	25/18496	0.00752862	0.0752862	0.0613756	FGF19/FGF5/FLRT2	3
MF	GO:0015296	monoatomic anion:monoatomic cation symporter activity	3/301	25/18496	0.00752862	0.0752862	0.0613756	SLC22A1/SLC6A11/SLC6A2	3
MF	GO:0001618	virus receptor activity	5/301	79/18496	0.00933958	0.0896695	0.0731012	CLDN6/EFNB2/EGFR/ITGA5/NCAM1	5
MF	GO:0098918	structural constituent of synapse	3/301	27/18496	0.00934852	0.0896695	0.0731012	ACTN1/NEFL/SHANK2	3
MF	GO:0140272	exogenous protein binding	5/301	80/18496	0.0098331	0.0924312	0.0753526	CLDN6/EFNB2/EGFR/ITGA5/NCAM1	5
MF	GO:0043236	laminin binding	3/301	28/18496	0.0103462	0.0948413	0.0773174	ITGA3/ITGA6/THBS1	3
MF	GO:0005544	calcium-dependent phospholipid binding	4/301	53/18496	0.0107719	0.0948413	0.0773174	ANXA10/ANXA13/SYT13/SYT7	4
MF	GO:0015203	polyamine transmembrane transporter activity	2/301	10/18496	0.0108967	0.0948413	0.0773174	SLC22A1/SLC22A3	2
MF	GO:0015658	branched-chain amino acid transmembrane transporter activity	2/301	10/18496	0.0108967	0.0948413	0.0773174	SLC6A15/SLC7A8	2
MF	GO:0015293	symporter activity	7/301	149/18496	0.0111362	0.0951637	0.0775803	SLC13A5/SLC22A1/SLC5A12/SLC6A11/SLC6A15/SLC6A17/SLC6A2	7
MF	GO:0001968	fibronectin binding	3/301	29/18496	0.0114034	0.095294	0.0776865	FSTL3/ITGA3/THBS1	3
MF	GO:0004175	endopeptidase activity	13/301	389/18496	0.0116299	0.095294	0.0776865	ADAMTS15/ADAMTS6/CTSV/F3/FAP/MMP1/MMP10/MMP13/MMP16/PLAU/PROC/PRSS23/TLL1	13
MF	GO:0015294	solute:monoatomic cation symporter activity	6/301	117/18496	0.0122735	0.095294	0.0776865	SLC13A5/SLC22A1/SLC5A12/SLC6A11/SLC6A15/SLC6A2	6
MF	GO:0005184	neuropeptide hormone activity	3/301	30/18496	0.0125205	0.095294	0.0776865	GAL/GRP/VGF	3
MF	GO:0160041	neuropeptide activity	3/301	30/18496	0.0125205	0.095294	0.0776865	GAL/GRP/VGF	3
MF	GO:0015171	amino acid transmembrane transporter activity	5/301	85/18496	0.0125707	0.095294	0.0776865	SLC16A2/SLC6A11/SLC6A15/SLC7A11/SLC7A8	5
MF	GO:0042562	hormone binding	5/301	85/18496	0.0125707	0.095294	0.0776865	CDH13/EGFR/INHBA/NPR2/RXFP1	5
MF	GO:0048185	activin binding	2/301	11/18496	0.0131761	0.0967621	0.0788833	FST/FSTL3	2
MF	GO:0050998	nitric-oxide synthase binding	2/301	11/18496	0.0131761	0.0967621	0.0788833	CAV1/SCN5A	2
MF	GO:0048019	receptor antagonist activity	3/301	31/18496	0.013698	0.0990474	0.0807463	DKK1/DKK3/FST	3
MF	GO:0017166	vinculin binding	2/301	12/18496	0.015643	0.108121	0.0881431	ACTN1/CORO2B	2
MF	GO:0031543	peptidyl-proline dioxygenase activity	2/301	12/18496	0.015643	0.108121	0.0881431	P3H2/P4HA3	2
MF	GO:0035497	cAMP response element binding	2/301	12/18496	0.015643	0.108121	0.0881431	CREB5/HMGA2	2
MF	GO:0030296	protein tyrosine kinase activator activity	3/301	33/18496	0.0162362	0.110595	0.0901601	AREG/EGFR/NRG1	3
MF	GO:0005172	vascular endothelial growth factor receptor binding	2/301	13/18496	0.0182905	0.118001	0.0961977	ITGA5/VEGFC	2
MF	GO:0039706	co-receptor binding	2/301	13/18496	0.0182905	0.118001	0.0961977	DKK1/DKK3	2
MF	GO:1901338	catecholamine binding	2/301	13/18496	0.0182905	0.118001	0.0961977	ADRA2C/TH	2
MF	GO:0008028	monocarboxylic acid transmembrane transporter activity	4/301	62/18496	0.0183278	0.118001	0.0961977	SLC16A2/SLC5A12/SLC6A11/SLCO1B3	4
MF	GO:0071855	neuropeptide receptor binding	3/301	35/18496	0.0190205	0.120806	0.0984843	APLN/GAL/KISS1	3
MF	GO:0004065	arylsulfatase activity	2/301	14/18496	0.0211124	0.128868	0.105057	ARSI/SULF2	2
MF	GO:0005161	platelet-derived growth factor receptor binding	2/301	14/18496	0.0211124	0.128868	0.105057	ITGA5/PDGFC	2
MF	GO:0008195	phosphatidate phosphatase activity	2/301	14/18496	0.0211124	0.128868	0.105057	PLPP4/PLPPR1	2
MF	GO:0030594	neurotransmitter receptor activity	5/301	99/18496	0.0228583	0.137736	0.112286	CHRNA9/CHRNG/GRIA3/HTR1D/HTR7	5
MF	GO:0140161	monocarboxylate:sodium symporter activity	2/301	15/18496	0.0241021	0.1416	0.115436	SLC5A12/SLC6A11	2
MF	GO:1901611	phosphatidylglycerol binding	2/301	15/18496	0.0241021	0.1416	0.115436	ANXA13/GSDME	2
MF	GO:0008227	G protein-coupled amine receptor activity	3/301	39/18496	0.0253317	0.146987	0.119828	ADRA2C/HTR1D/HTR7	3
MF	GO:0042056	chemoattractant activity	3/301	41/18496	0.0288588	0.164045	0.133734	GDNF/SCG2/VEGFC	3
MF	GO:0046873	metal ion transmembrane transporter activity	13/301	441/18496	0.0291095	0.164045	0.133734	CHRNA9/KCNF1/LRRC38/SCN4B/SCN5A/SCN9A/SLC13A5/SLC22A1/SLC5A12/SLC6A11/SLC6A15/SLC6A2/TRPC1	13
MF	GO:0008484	sulfuric ester hydrolase activity	2/301	17/18496	0.0305607	0.164045	0.133734	ARSI/SULF2	2
MF	GO:0008569	minus-end-directed microtubule motor activity	2/301	17/18496	0.0305607	0.164045	0.133734	DNAH14/DNAH5	2
MF	GO:0030169	low-density lipoprotein particle binding	2/301	17/18496	0.0305607	0.164045	0.133734	CDH13/THBS1	2
MF	GO:0030547	signaling receptor inhibitor activity	3/301	42/18496	0.0307147	0.164045	0.133734	DKK1/DKK3/FST	3
MF	GO:0043028	cysteine-type endopeptidase regulator activity involved in apoptotic process	3/301	42/18496	0.0307147	0.164045	0.133734	BIRC2/CTSV/FOXL2	3
MF	GO:0008237	metallopeptidase activity	7/301	185/18496	0.0320567	0.169288	0.138009	ADAMTS15/ADAMTS6/MMP1/MMP10/MMP13/MMP16/TLL1	7
MF	GO:0005272	sodium channel activity	3/301	43/18496	0.032632	0.170412	0.138925	SCN4B/SCN5A/SCN9A	3
MF	GO:0008301	DNA binding, bending	2/301	18/18496	0.0340176	0.175695	0.143232	FOXL1/HMGA2	2
MF	GO:0005126	cytokine receptor binding	9/301	273/18496	0.0352329	0.17954	0.146366	CSF2/IFNK/IL11/IL1A/IL6/ITGA5/LIF/NGF/VEGFC	9
MF	GO:0022804	active transmembrane transporter activity	13/301	454/18496	0.035526	0.17954	0.146366	ABCA4/SLC13A5/SLC16A2/SLC22A1/SLC22A3/SLC5A12/SLC6A11/SLC6A15/SLC6A17/SLC6A2/SLC7A11/SLC7A8/SLCO1B3	13
MF	GO:0003774	cytoskeletal motor activity	5/301	112/18496	0.0362607	0.181303	0.147804	DNAH14/DNAH5/KIF1A/MYH3/MYO7B	5
MF	GO:0015355	secondary active monocarboxylate transmembrane transporter activity	2/301	19/18496	0.0376187	0.182276	0.148597	SLC5A12/SLC6A11	2
MF	GO:0015651	quaternary ammonium group transmembrane transporter activity	2/301	19/18496	0.0376187	0.182276	0.148597	SLC22A1/SLC22A3	2
MF	GO:0042577	lipid phosphatase activity	2/301	19/18496	0.0376187	0.182276	0.148597	PLPP4/PLPPR1	2
MF	GO:0015175	neutral L-amino acid transmembrane transporter activity	3/301	46/18496	0.0387489	0.185836	0.151499	SLC6A15/SLC7A11/SLC7A8	3
MF	GO:0022839	monoatomic ion gated channel activity	10/301	325/18496	0.0407408	0.191008	0.155716	ANO1/CHRNA9/CHRNG/CNGB1/GRIA3/KCNF1/LRRC38/SCN4B/SCN5A/SCN9A	10
MF	GO:0031406	carboxylic acid binding	7/301	195/18496	0.0407732	0.191008	0.155716	CYP4F11/FOLR3/P3H2/P4HA3/SERPINA5/ST8SIA2/TH	7
MF	GO:0031418	L-ascorbic acid binding	2/301	20/18496	0.0413584	0.191008	0.155716	P3H2/P4HA3	2
MF	GO:0022836	gated channel activity	10/301	326/18496	0.0414529	0.191008	0.155716	ANO1/CHRNA9/CHRNG/CNGB1/GRIA3/KCNF1/LRRC38/SCN4B/SCN5A/SCN9A	10
MF	GO:0008373	sialyltransferase activity	2/301	21/18496	0.0452312	0.206395	0.168259	ST6GAL2/ST8SIA2	2
MF	GO:0005261	monoatomic cation channel activity	10/301	333/18496	0.0466773	0.210945	0.171969	ANO1/CHRNA9/CHRNG/CNGB1/KCNF1/LRRC38/SCN4B/SCN5A/SCN9A/TRPC1	10
MF	GO:0004993	G protein-coupled serotonin receptor activity	2/301	22/18496	0.0492318	0.219973	0.179328	HTR1D/HTR7	2
MF	GO:0008013	beta-catenin binding	4/301	85/18496	0.0499783	0.219973	0.179328	AJAP1/CDH2/DACT1/SALL1	4

## Sheet: S8
category	subcategory	ID	Description	GeneRatio	BgRatio	pvalue	p.adjust	qvalue	geneID	Count
Environmental Information Processing	Signaling molecules and interaction	hsa04512	ECM-receptor interaction	13/148	89/8840	2.2549e-09	4.7353e-07	4.13003e-07	COL2A1/COL4A6/FN1/FREM2/IBSP/ITGA3/ITGA5/ITGA6/LAMA3/LAMB3/LAMC2/THBS1/TNC	13
Cellular Processes	Cellular community - eukaryotes	hsa04510	Focal adhesion	18/148	203/8840	6.65924e-09	6.99221e-07	6.09847e-07	ACTN1/BIRC2/CAV1/COL2A1/COL4A6/EGFR/FN1/IBSP/ITGA3/ITGA5/ITGA6/LAMA3/LAMB3/LAMC2/PDGFC/THBS1/TNC/VEGFC	18
Environmental Information Processing	Signal transduction	hsa04151	PI3K-Akt signaling pathway	22/148	362/8840	1.31933e-07	9.23531e-06	8.05486e-06	AREG/COL2A1/COL4A6/CREB5/EGFR/FGF19/FGF5/FN1/GDNF/IBSP/IL6/ITGA3/ITGA5/ITGA6/LAMA3/LAMB3/LAMC2/NGF/PDGFC/THBS1/TNC/VEGFC	22
Human Diseases	Cancer: specific types	hsa05222	Small cell lung cancer	9/148	93/8840	2.35563e-05	0.00123671	0.00107863	BIRC2/COL4A6/FN1/ITGA3/ITGA6/LAMA3/LAMB3/LAMC2/RXRG	9
Human Diseases	Infectious disease: viral	hsa05165	Human papillomavirus infection	17/148	333/8840	3.90689e-05	0.00164089	0.00143115	CCNA1/COL2A1/COL4A6/CREB5/EGFR/FN1/IBSP/ITGA3/ITGA5/ITGA6/LAMA3/LAMB3/LAMC2/THBS1/TNC/WNT11/WNT7A	17
Environmental Information Processing	Signal transduction	hsa04390	Hippo signaling pathway	10/148	157/8840	0.000292483	0.00833005	0.00726531	AREG/BIRC2/GDF6/GLI2/NKD1/SERPINE1/SNAI2/WNT11/WNT7A/YAP1	10
Human Diseases	Infectious disease: parasitic	hsa05146	Amoebiasis	8/148	103/8840	0.000317335	0.00833005	0.00726531	ACTN1/COL4A6/CSF2/FN1/IL6/LAMA3/LAMB3/LAMC2	8
Environmental Information Processing	Signaling molecules and interaction	hsa04080	Neuroactive ligand-receptor interaction	16/148	368/8840	0.000422627	0.00957328	0.00834963	ADRA2C/APLN/CHRNA9/CHRNG/GAL/GPR50/GRIA3/GRP/HTR1D/HTR7/KISS1/LHB/NTSR1/RXFP1/SCT/VGF	16
Environmental Information Processing	Signaling molecules and interaction	hsa04060	Cytokine-cytokine receptor interaction	14/148	298/8840	0.000455871	0.00957328	0.00834963	CSF2/GDF6/IFNK/IL11/IL13RA2/IL1A/IL24/IL31RA/IL6/INHBA/INHBE/LIF/NGF/TNFRSF12A	14
Organismal Systems	Immune system	hsa04640	Hematopoietic cell lineage	7/148	99/8840	0.00131733	0.0251489	0.0219344	CSF2/IL11/IL1A/IL6/ITGA3/ITGA5/ITGA6	7
Human Diseases	Endocrine and metabolic disease	hsa04933	AGE-RAGE signaling pathway in diabetic complications	7/148	101/8840	0.00148035	0.0259061	0.0225948	COL4A6/F3/FN1/IL1A/IL6/SERPINE1/VEGFC	7
Organismal Systems	Digestive system	hsa04974	Protein digestion and absorption	7/148	105/8840	0.0018534	0.0299395	0.0261126	COL10A1/COL17A1/COL28A1/COL2A1/COL4A6/COL5A3/SLC7A8	7
Environmental Information Processing	Signal transduction	hsa04630	JAK-STAT signaling pathway	9/148	168/8840	0.00200224	0.0300336	0.0261948	CSF2/EGFR/IFNK/IL11/IL13RA2/IL24/IL31RA/IL6/LIF	9
Organismal Systems	Immune system	hsa04610	Complement and coagulation cascades	6/148	88/8840	0.00349358	0.0489101	0.0426584	F3/PLAU/PROC/SERPINA5/SERPINE1/SERPINE2	6
Human Diseases	Cancer: overview	hsa05202	Transcriptional misregulation in cancer	9/148	193/8840	0.00505156	0.0663018	0.0578271	BIRC2/CCNA1/CSF2/GRIA3/HMGA2/HOXA11/IL6/PLAU/RXRG	9
Organismal Systems	Endocrine system	hsa04926	Relaxin signaling pathway	7/148	130/8840	0.00609055	0.0752362	0.0656195	COL4A6/CREB5/EGFR/MMP1/MMP13/RXFP1/VEGFC	7
Human Diseases	Cancer: overview	hsa05205	Proteoglycans in cancer	9/148	204/8840	0.00720308	0.084036	0.0732945	CAV1/EGFR/FN1/ITGA5/PLAU/THBS1/TIMP3/WNT11/WNT7A	9
Environmental Information Processing	Signal transduction	hsa04350	TGF-beta signaling pathway	6/148	108/8840	0.00940337	0.103932	0.0906474	FST/GDF6/INHBA/INHBE/NOG/THBS1	6
Organismal Systems	Endocrine system	hsa04928	Parathyroid hormone synthesis, secretion and action	6/148	115/8840	0.0125786	0.132075	0.115194	CREB5/EGFR/MMP13/MMP16/PTHLH/RXRG	6
Human Diseases	Cardiovascular disease	hsa05412	Arrhythmogenic right ventricular cardiomyopathy	5/148	86/8840	0.014468	0.137312	0.119761	CDH2/ITGA3/ITGA5/ITGA6/SGCE	5
Environmental Information Processing	Signal transduction	hsa04668	TNF signaling pathway	6/148	119/8840	0.0146978	0.137312	0.119761	BIRC2/CREB5/CSF2/IL6/LIF/VEGFC	6
Cellular Processes	Cell motility	hsa04810	Regulation of actin cytoskeleton	9/148	230/8840	0.0150389	0.137312	0.119761	ACTN1/EGFR/FGF19/FGF5/FN1/ITGA3/ITGA5/ITGA6/PDGFC	9
Human Diseases	Immune disease	hsa05323	Rheumatoid arthritis	5/148	94/8840	0.0205223	0.176047	0.153545	CSF2/IL11/IL1A/IL6/MMP1	5
Human Diseases	Cancer: specific types	hsa05217	Basal cell carcinoma	4/148	63/8840	0.020958	0.176047	0.153545	GLI1/GLI2/WNT11/WNT7A	4
Human Diseases	Cardiovascular disease	hsa05410	Hypertrophic cardiomyopathy	5/148	99/8840	0.0250404	0.200648	0.175001	IL6/ITGA3/ITGA5/ITGA6/SGCE	5
Environmental Information Processing	Signal transduction	hsa04020	Calcium signaling pathway	9/148	254/8840	0.026694	0.200648	0.175001	EGFR/FGF19/FGF5/GDNF/HTR7/NGF/NTSR1/PDGFC/VEGFC	9
Environmental Information Processing	Signal transduction	hsa04310	Wnt signaling pathway	7/148	174/8840	0.0267531	0.200648	0.175001	APCDD1L/DKK1/NKD1/RSPO4/SFRP5/WNT11/WNT7A	7
Human Diseases	Cancer: specific types	hsa05219	Bladder cancer	3/148	41/8840	0.0308366	0.223299	0.194757	EGFR/MMP1/THBS1	3
Human Diseases	Cancer: specific types	hsa05218	Melanoma	4/148	73/8840	0.0337311	0.228546	0.199333	EGFR/FGF19/FGF5/PDGFC	4
Cellular Processes	Cellular community - eukaryotes	hsa04550	Signaling pathways regulating pluripotency of stem cells	6/148	144/8840	0.0337377	0.228546	0.199333	INHBA/INHBE/LHX5/LIF/WNT11/WNT7A	6
Human Diseases	Infectious disease: parasitic	hsa05145	Toxoplasmosis	5/148	111/8840	0.0383485	0.251662	0.219495	BIRC2/ITGA6/LAMA3/LAMB3/LAMC2	5
Human Diseases	Cancer: specific types	hsa05226	Gastric cancer	6/148	150/8840	0.0399519	0.254239	0.221742	EGFR/FGF19/FGF5/RXRG/WNT11/WNT7A	6
Human Diseases	Drug resistance: antineoplastic	hsa01521	EGFR tyrosine kinase inhibitor resistance	4/148	80/8840	0.0448682	0.277127	0.241705	EGFR/IL6/NRG1/PDGFC	4
Cellular Processes	Cell motility	hsa04814	Motor proteins	7/148	197/8840	0.0473608	0.280398	0.244558	ACTG2/DNAH14/DNAH5/KIF1A/MYH3/MYL4/MYO7B	7
Environmental Information Processing	Signaling molecules and interaction	hsa04514	Cell adhesion molecules	6/148	157/8840	0.0480683	0.280398	0.244558	CDH2/CLDN6/ITGA6/L1CAM/NCAM1/SLITRK6	6
